# Supplementary material for: High spatial resolution (10–50 μm) analysis of Sr isotopes in rock-forming apatite by LA-MC-ICP-MS
Source: Royal Society of Chemistry journal article supplement (doi:10.1039/d3ja00177f), 2023-01-01
Supplement: d3ja00177f1.pdf [file d3ja00177f1.pdf]

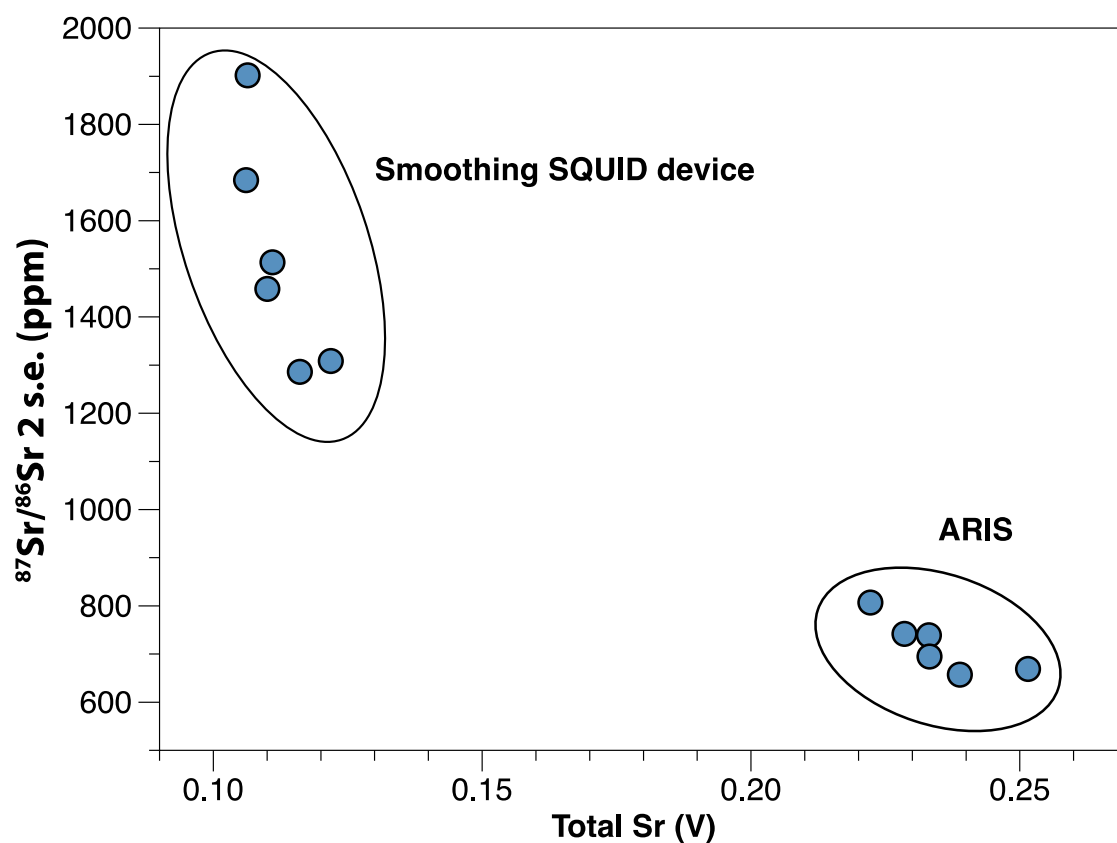

Supplementary Figure 1. Total Sr intensity and internal precision of Durango apatite analyses by LA-MC-ICP-MS with a 13x13  $\mu\text{m}$  laser ablation beam, depending on the device used to transport the ablated material from the ablation cell to the plasma (i.e. smoothing SQUID or ARIS).
