# Supplementary material for: High spatial resolution (10–50 μm) analysis of Sr isotopes in rock-forming apatite by LA-MC-ICP-MS
Source: Royal Society of Chemistry journal article supplement (doi:10.1039/d3ja00177f), 2023-01-01
Supplement: d3ja00177f3.xlsx [file d3ja00177f3.xlsx]

## Sheet: Sheet1
					Background measurements (V)																						Intensities corrected for background (V)													Method 1 Mass Bias correction only								Method 2 Mass Bias ,REE, Rb and Ca correction
Processed analysis #	Sample name				83Kr	3sd	83.5	3sd	84Sr	3sd	85Rb	3sd	85.5	3sd	86Sr	3sd	86.5	3sd	87Sr	3sd	88Sr	3sd		Total Sr(V) raw			83Kr	83.5	84Sr	85Rb	85.49	86Sr	86.5	87Sr	88Sr					87Sr/86Sr	2 s.e.	2 s.e. ppm	deviation from true (ppm)	no. cycles				87Sr/86Sr	2 s.e.
01	Dur01-Seq7-50um		2022-09-01		0.000438552	0.000152391	6.29808e-07	9.62645e-05	0.00211066	0.000134956	1.63079e-06	0.000115213	-9.18629e-05	0.000130987	0.000697604	0.000120107	1.15466e-06	0.00010227	3.34247e-05	0.000135829	0.000273476	0.000122888		4.17041			0.00199336	0.00123954	0.0252455	0.00081179	0.000313122	0.400526	0.000279176	0.287206	3.44365					0.707683	8.10861e-05	114.58	1918.58	58				0.706428	7.28627e-05
02	Dur02-Seq7-50um		2022-09-01		0.000436829	0.000127905	3.97071e-06	0.000127106	0.00213235	0.000129771	3.07274e-06	0.000126459	-8.84004e-05	0.000112087	0.000701821	0.000137906	9.32888e-06	0.000114395	4.81005e-05	0.000130724	0.000310358	0.000113725		4.16301			0.00189568	0.00117458	0.0251077	0.000771383	0.000277077	0.399851	0.000259067	0.28669	3.4375					0.707628	6.33253e-05	89.4895	1840.55	57				0.706455	7.03685e-05
03	Dur03-Seq7-50um		2022-09-01		0.000447051	0.000124487	2.05475e-06	0.000104584	0.00212325	0.000137006	7.01216e-06	0.000105391	-9.55154e-05	0.000117761	0.000706077	0.000140239	8.36497e-06	0.000127822	5.03169e-05	0.000113215	0.000325118	0.000126888		4.02795			0.00194387	0.00121954	0.0244199	0.00078874	0.000310944	0.386879	0.000283839	0.277428	3.32595					0.70776	7.56336e-05	106.863	2027.6	57				0.706448	7.16067e-05
04	Dur01-Seq8-50um		2022-09-01		0.000435275	0.000127706	5.27953e-06	0.000125401	0.00211124	0.00014558	1.50465e-06	0.000117307	-9.30095e-05	0.000110359	0.000703302	0.000129027	2.58625e-06	0.000122563	4.61264e-05	0.000121787	0.000352961	0.000123338		3.20574			0.000693096	0.000406073	0.0187666	0.000245547	0.000111073	0.30774	9.6959e-05	0.220494	2.64695					0.706917	7.63828e-05	108.051	833.752	56				0.706396	9.24968e-05
05	Dur02-Seq8-50um		2022-09-01		0.000431092	0.000123846	3.99749e-06	0.000128231	0.00211712	0.000141023	-3.3004e-06	0.00010877	-8.89722e-05	0.000101178	0.00070589	0.000125121	5.29219e-06	0.000120688	4.14683e-05	0.000122073	0.000328711	0.000112072		3.21268			0.000714378	0.000421293	0.0188212	0.000284889	0.000102684	0.308392	8.88661e-05	0.220978	2.6527					0.706949	8.71386e-05	123.26	879.516	58				0.70645	8.35473e-05
06	Dur03-Seq8-50um		2022-09-01		0.000436664	0.000121909	5.57157e-06	0.000159592	0.00212949	0.000138884	9.06878e-06	9.51185e-05	-9.92773e-05	0.00012138	0.000690426	0.000115009	4.47568e-06	9.68886e-05	5.29095e-05	0.000121736	0.00031386	0.000128871		3.29307			0.000756718	0.000443537	0.0193085	0.000284092	0.000111798	0.3161	9.78146e-05	0.226492	2.7191					0.706954	9.0963e-05	128.669	886.183	59				0.706385	0.000107229
07	Dur01-Seq11-50um		2022-09-01		0.000437213	0.000106585	5.03231e-06	9.87161e-05	0.00210815	0.000124495	1.97986e-06	9.4583e-05	-9.06251e-05	0.000103795	0.000697495	0.000118254	4.65067e-06	0.000136668	3.27644e-05	0.000109482	0.000298174	0.000132018		3.32044			0.000784007	0.000454638	0.0195413	0.000311948	0.000110485	0.318747	0.000102459	0.228408	2.74173					0.706993	7.27593e-05	102.914	941.424	57				0.7064	8.89561e-05
08	Dur02-Seq11-50um		2022-09-01		0.00044357	8.90488e-05	8.14421e-06	0.00013172	0.00211999	0.000133416	1.60714e-06	0.000145493	-0.000100175	0.000103859	0.000704928	0.000118266	-4.1565e-06	0.000118359	3.53659e-05	0.000116911	0.000315273	0.000113989		2.97044			0.00062376	0.000365749	0.017411	0.000247226	0.000104566	0.285216	9.83917e-05	0.204406	2.45267					0.707183	7.41942e-05	104.915	1210.54	58				0.706583	9.27073e-05
09	Dur03-Seq11-50um		2022-09-01		0.000444543	0.000131374	8.74512e-06	0.000133788	0.00210172	0.000146966	1.13389e-05	0.000109411	-0.000102088	0.000136657	0.000696218	0.000131314	-1.70494e-06	0.000113897	4.53007e-05	0.000116135	0.000317376	0.000107055		3.67427			0.000948519	0.000576448	0.0217087	0.000396494	0.000143523	0.35264	0.000124499	0.252737	3.03389					0.707033	6.48787e-05	91.7619	997.917	57				0.706396	7.75835e-05
10	Dur01-Seq12-50um		2022-09-01		0.000438755	0.000111045	5.48788e-06	0.000134676	0.00210557	0.000147666	1.0727e-05	0.000132416	-9.55244e-05	0.000106885	0.000703225	0.000109538	6.25915e-06	0.000113573	4.46585e-05	0.000114899	0.000345278	0.000128577		3.53268			0.000855082	0.000508837	0.0207597	0.000313363	0.000133668	0.339044	0.000109062	0.243002	2.91694					0.707098	6.71264e-05	94.9322	1090.6	57				0.706513	9.2368e-05
11	Dur02-Seq12-50um		2022-09-01		0.00044108	0.000125234	5.94845e-06	9.37071e-05	0.00210833	0.000114507	2.89415e-06	0.000122858	-9.4375e-05	0.000121151	0.000704258	9.55378e-05	1.2996e-06	0.000105658	4.86685e-05	0.000109231	0.000344532	0.000133045		3.44256			0.000843908	0.000500853	0.0202888	0.000316542	0.000136361	0.330431	0.000108289	0.236796	2.84253					0.707008	5.92399e-05	83.7897	962.198	58				0.706447	8.15858e-05
12	Dur03-Seq12-50um		2022-09-01		0.000431426	0.000124254	5.53519e-06	0.00011343	0.00210225	0.000180464	3.75636e-06	0.000113703	-8.85071e-05	0.000110991	0.000704253	0.000137005	-1.785e-06	9.55434e-05	4.62477e-05	0.000116953	0.000336388	0.000121186		3.51569			0.000905712	0.000531311	0.0207628	0.000347833	0.000142264	0.337446	0.000129596	0.241825	2.90292					0.707039	5.48441e-05	77.5687	1006.28	55				0.706341	7.63128e-05
13	Dur01-Seq13-50um		2022-09-01		0.000425255	0.000104518	1.12253e-05	0.000138211	0.00208466	0.000124706	-1.93896e-05	0.00010002	-9.88574e-05	0.000140735	0.000784861	0.000112939	4.51429e-06	0.000133211	0.000118285	0.000126726	0.00108439	0.000144191		3.80486			0.0016755	0.00103989	0.0228336	0.000677349	0.000237356	0.365268	0.000219359	0.261876	3.14097					0.707482	6.77588e-05	95.7746	1633.89	58				0.706415	7.25153e-05
14	Dur02-Seq13-50um		2022-09-01		0.000430209	9.22729e-05	7.41202e-09	0.000103903	0.00206915	0.000152406	-2.27438e-05	0.000149354	-0.000105368	0.000132771	0.000757194	0.000121369	-1.55557e-07	0.000116187	9.42493e-05	0.000107149	0.000860265	0.000137239		3.91421			0.00190253	0.00120181	0.0236745	0.000788068	0.000304931	0.375893	0.00029504	0.269554	3.2315					0.707704	7.56295e-05	106.866	1947.66	58				0.706326	6.69872e-05
15	Dur03-Seq13-50um		2022-09-01		0.000433932	0.00012363	1.18824e-05	0.000119251	0.00209225	0.000149448	-1.6369e-05	0.000163662	-0.000102463	0.000128	0.000749106	0.000101714	-3.94703e-06	9.89854e-05	7.79565e-05	9.82227e-05	0.000770902	0.000133725		3.93646			0.00180986	0.00114251	0.0236781	0.000733541	0.000265297	0.377885	0.000245773	0.270983	3.24996					0.707576	6.35922e-05	89.8734	1766.26	59				0.706398	6.81767e-05
16	Dur01-Seq14-50um		2022-09-01		0.000442393	0.000140967	1.52679e-05	0.00013835	0.0020891	0.000133439	-1.43723e-05	0.000110006	-0.000113082	0.00013912	0.000736126	9.16035e-05	9.56256e-06	0.00013957	7.4932e-05	0.000111556	0.000715227	0.000136595		3.8352			0.0016312	0.00102585	0.0229759	0.000663817	0.00025137	0.368192	0.00021933	0.263989	3.16639					0.707501	8.17098e-05	115.491	1661.3	59				0.70642	9.42115e-05
17	Dur02-Seq14-50um		2022-09-01		0.000436239	0.000117539	9.88314e-06	9.22897e-05	0.00208561	0.00012026	-1.37615e-05	0.00012101	-0.000104832	0.000134186	0.000733567	0.000118846	5.20606e-06	0.000114901	7.06676e-05	0.000136473	0.000649033	0.000110125		3.91873			0.00181153	0.0011368	0.0235778	0.000738505	0.000274457	0.376191	0.000245138	0.269768	3.23544					0.707569	6.82718e-05	96.4879	1757.02	59				0.706402	7.01936e-05
18	Dur03-Seq14-50um		2022-09-01		0.00044054	0.000101935	3.55931e-06	0.000118402	0.00208174	0.000113564	-5.99065e-06	0.000114565	-0.000101577	0.000141804	0.000723102	0.000132964	3.15967e-06	0.000121111	7.53584e-05	0.000132655	0.000602443	0.000120719		3.77427			0.00162699	0.0010157	0.0226052	0.000655503	0.000226609	0.362324	0.000216475	0.25979	3.11619					0.707502	7.97331e-05	112.697	1662.7	57				0.706428	9.73268e-05
19	Dur01-Seq15-50um		2022-09-01		0.000427607	0.000127877	1.57019e-05	0.000116416	0.00204815	0.000142898	-2.99183e-06	0.000119131	-0.00010483	0.000106603	0.000713009	0.000106918	6.14058e-06	0.000114866	5.993e-05	0.000118747	0.000560642	0.00012304		3.43236			0.000788519	0.00046262	0.0200676	0.000299337	0.000115669	0.329349	0.00011357	0.236023	2.83388					0.706985	8.21607e-05	116.213	930.024	58				0.706389	0.00010056
20	Dur02-Seq15-50um		2022-09-01		0.000429143	0.000110767	6.10891e-06	0.000141229	0.00206225	0.000157992	-1.88539e-06	0.000101534	-0.000104362	0.000100956	0.000708188	9.52723e-05	5.49619e-06	0.000137347	7.03387e-05	0.000108962	0.000521873	0.000122089		3.39453			0.000783975	0.000475554	0.0198571	0.000294296	0.000120678	0.325756	0.000107678	0.233411	2.80268					0.706878	9.03101e-05	127.759	778.791	58				0.706279	0.000104023
21	Dur03-Seq15-50um		2022-09-01		0.000437985	0.000102993	6.06987e-06	0.000114561	0.00206787	0.000117499	-1.42104e-06	0.000125211	-0.000101071	0.000107181	0.000708452	0.0001083	2.80757e-06	0.000107502	6.15045e-05	0.000114937	0.000506389	0.000104936		3.21522			0.000765473	0.000460133	0.0188899	0.000298775	0.00012302	0.308573	0.000106346	0.221133	2.65462					0.707041	8.45635e-05	119.602	1008.94	58				0.706396	0.000103325
22	Dur01-Seq16-50um		2022-09-01		0.000427235	0.000137879	-1.3103e-06	0.000108632	0.00207131	0.000147529	-3.94022e-06	0.000119846	-9.45088e-05	0.000145485	0.000711123	0.000106782	-3.12453e-07	0.000102912	5.11994e-05	0.000116104	0.000495532	0.000111479		3.2441			0.000774737	0.000465794	0.0190497	0.000290864	0.000110316	0.311348	0.000115558	0.223102	2.67848					0.706972	9.07404e-05	128.351	911.832	57				0.706313	0.000102314
23	Dur02-Seq16-50um		2022-09-01		0.000437039	0.000110457	1.28255e-05	0.000128829	0.00207477	0.000136445	-6.87516e-06	0.000111605	-0.000100765	0.000125351	0.000700248	0.000105166	-1.24029e-06	0.00015679	5.84856e-05	0.000107601	0.000468772	0.000152151		3.31264			0.000807906	0.000475368	0.0194683	0.000303851	0.000122279	0.317962	0.000116476	0.227851	2.73511					0.707027	6.76116e-05	95.628	990.212	55				0.706375	8.182e-05
24	Dur03-Seq16-50um		2022-09-01		0.00043966	0.000118391	4.15744e-06	0.000134413	0.00208459	0.000154259	1.47993e-06	0.000128896	-0.00011182	0.000152175	0.000712393	8.67967e-05	9.87262e-06	0.000104437	5.92462e-05	0.000106626	0.000452974	9.07589e-05		3.0937			0.000706199	0.000419438	0.0181219	0.000254834	0.000114587	0.296958	0.000102969	0.212808	2.55432					0.70707	6.32373e-05	89.4357	1049.94	57				0.706418	7.64533e-05
25	Dur01-Seq17-50um		2022-09-01		0.000437996	0.000104329	1.48609e-06	0.000126274	0.00207816	0.000127626	-1.64418e-05	0.000105103	-0.00010576	0.000121431	0.000702319	0.000115323	8.3051e-06	9.26831e-05	6.35021e-05	0.000107714	0.000456404	0.000130695		3.05464			0.000698704	0.000416548	0.0178912	0.000259042	0.000124589	0.293227	9.51255e-05	0.2101	2.52206					0.706986	7.24837e-05	102.525	931.818	59				0.706413	9.05253e-05
26	Dur02-Seq17-50um		2022-09-01		0.000442348	0.000117346	-4.79041e-06	0.000124844	0.0020775	0.000130005	-1.5692e-05	0.000134426	-9.05845e-05	0.000102996	0.000701635	0.000141809	4.90737e-06	0.000115395	5.05719e-05	0.00010921	0.000437789	0.000105286		3.17959			0.000752166	0.000460197	0.01867	0.000284723	0.000110632	0.305162	0.000112516	0.218671	2.62526					0.706961	7.86567e-05	111.26	896.482	58				0.706301	8.13634e-05
27	Dur03-Seq17-50um		2022-09-01		0.000442484	0.00012891	4.51101e-06	0.000102365	0.00207721	0.000126999	-1.38028e-05	0.000133754	-0.000117297	0.00011679	0.000699597	0.000138805	-2.22264e-06	0.00012262	5.15192e-05	0.000128479	0.000423585	0.000126196		3.1003			0.000719364	0.000428452	0.0181753	0.000279248	0.000128827	0.297606	0.000110679	0.213246	2.5598					0.707001	9.34436e-05	132.169	953.213	59				0.706324	0.000115222
28	Dur01-Seq1-50um		2022-09-02		0.000440492	0.000137468	7.79161e-06	0.000123369	0.00215999	0.000157721	1.51551e-05	0.000109591	-0.000104446	0.00013465	0.000685755	0.000110081	5.8699e-06	8.78904e-05	1.74346e-05	0.000128214	7.69773e-05	0.000124401		3.43351			0.000843514	0.000507635	0.0202133	0.00031914	0.000126242	0.329513	0.000117423	0.236156	2.83532					0.707003	7.74795e-05	109.589	955.768	57				0.706338	0.000104718
29	Dur02-Seq1-50um		2022-09-02		0.000443083	0.000118537	1.64628e-05	0.000127686	0.00218597	0.000141397	1.63563e-06	8.85517e-05	-0.000118523	0.000122464	0.000691967	0.000110313	-1.64735e-06	0.000114203	2.75705e-05	0.00012279	0.000153728	0.000112986		3.61393			0.00089677	0.000531308	0.0212261	0.00034629	0.000149521	0.34686	0.000125667	0.248575	2.98423					0.706994	5.85208e-05	82.774	943.514	56				0.706368	6.97948e-05
30	Dur03-Seq1-50um		2022-09-02		0.000443293	0.000126165	9.88847e-06	0.000101685	0.00218897	0.000171886	1.64724e-06	0.000106972	-0.000107512	0.000140242	0.000705815	0.000124297	6.69233e-06	0.000114273	2.55258e-05	0.000138559	0.000200788	0.000133082		3.52981			0.000907012	0.000553939	0.0207694	0.000337808	0.000143666	0.338731	0.000119259	0.242765	2.91472					0.707005	7.73151e-05	109.356	958.721	57				0.706367	8.98362e-05
31	Dur01-Seq2-50um		2022-09-02		0.000437753	0.000114906	3.94234e-06	0.000115775	0.00218094	0.000162708	-1.13321e-05	0.000120894	-0.000103431	0.000122932	0.000713263	0.000124123	3.24701e-06	0.000112575	2.69784e-05	0.000103865	0.000232873	0.000106122		3.49988			0.000913771	0.000543579	0.0205809	0.000346135	0.000125703	0.335819	0.00011627	0.240704	2.88998					0.707006	6.16689e-05	87.2255	959.343	58				0.706412	7.86485e-05
32	Dur02-Seq2-50um		2022-09-02		0.000448926	0.000129857	3.67744e-06	0.000102154	0.0021797	0.000150457	-1.01983e-05	0.00011411	-0.000100602	0.000127926	0.000709499	0.000117913	9.25357e-06	0.000127546	4.67951e-05	0.000119647	0.000251792	0.000128962		3.53703			0.000918431	0.000567057	0.020815	0.000366064	0.000140638	0.339395	0.000105656	0.243233	2.92062					0.706955	6.59962e-05	93.3528	887.241	57				0.706384	8.40953e-05
33	Dur03-Seq2-50um		2022-09-02		0.00044487	0.000105079	9.20428e-06	9.93064e-05	0.00218552	0.000156928	-1.57796e-05	0.000114609	-0.000105691	0.000133204	0.000701192	0.00011658	6.18388e-06	0.00013005	3.39716e-05	0.000111822	0.000264703	0.00011505		3.38403			0.000837571	0.000509488	0.0198646	0.000329688	0.000121555	0.324768	0.000109613	0.232734	2.79427					0.706941	7.04651e-05	99.676	868.198	59				0.70635	9.28243e-05
34	Dur01-Seq4-50um		2022-09-05		0.000442324	0.000126882	1.31404e-05	0.000102059	0.00215396	0.000118418	-3.25483e-06	0.000123177	-9.29114e-05	0.000131565	0.000689515	0.000107974	1.09119e-05	0.000128583	1.9203e-05	0.000104125	0.000132813	0.000125362		3.07251			0.000743411	0.000434311	0.0181388	0.000284036	0.000121641	0.294891	9.44466e-05	0.211356	2.53715					0.707068	8.27099e-05	116.976	1048.24	58				0.706446	9.91284e-05
35	Dur02-Seq4-50um		2022-09-05		0.000435037	0.000131915	8.17198e-06	0.000119485	0.00213804	0.000127397	-8.85843e-07	0.000118858	-9.7717e-05	0.000133323	0.000688295	0.000110798	1.9617e-05	0.000112028	2.04776e-05	0.000114458	0.000180434	0.000126788		3.44149			0.000879013	0.00051958	0.0202851	0.000332493	0.000130915	0.33024	0.000110213	0.236684	2.8418					0.706979	6.68924e-05	94.6172	921.418	57				0.706392	7.46687e-05
36	Dur03-Seq4-50um		2022-09-05		0.000439519	0.000119185	9.03477e-06	0.000130412	0.0021323	0.000142225	-4.49876e-06	0.00010426	-9.7338e-05	0.000120739	0.000692426	0.000112373	1.59156e-05	0.000125176	2.17866e-05	0.00010646	0.000208646	0.000120671		3.49052			0.000851454	0.000515803	0.0205555	0.000334193	0.000139588	0.334963	9.64288e-05	0.240078	2.88226					0.70703	9.09642e-05	128.657	994.565	58				0.70653	9.46673e-05
37	Dur01-Seq5-50um		2022-09-05		0.000434514	0.000128785	5.26081e-06	0.000118608	0.00211787	0.000142036	-1.1324e-05	0.000113078	-9.7186e-05	0.00011809	0.000684173	0.000123197	4.99325e-06	0.000121255	2.44542e-05	0.000122848	0.000234258	0.000134036		3.47295			0.000847229	0.000505107	0.0204321	0.000339132	0.000123999	0.333302	0.000111115	0.238855	2.86773					0.706962	7.71973e-05	109.196	897.577	58				0.706378	8.93985e-05
38	Dur02-Seq5-50um		2022-09-05		0.00043185	0.000121913	5.46787e-06	0.000104044	0.00211416	0.000135256	7.11169e-07	0.000104712	-0.00010488	0.000140113	0.000684114	0.000115279	6.85937e-06	0.000126893	2.22079e-05	0.000114988	0.000236133	0.000138251		3.29246			0.000793292	0.000472597	0.0193674	0.000306089	0.000127724	0.315973	0.000111927	0.226427	2.71868					0.706915	6.77773e-05	95.8775	831.266	57				0.706264	9.07492e-05
39	Dur03-Seq5-50um		2022-09-05		0.00043152	0.000116879	5.17752e-06	0.000118566	0.00209697	0.000136696	-8.53607e-06	0.000100273	-0.000102165	0.000119864	0.000686987	0.000131672	1.33475e-05	0.000113026	2.63028e-05	0.000124155	0.000224659	0.000137784		3.16199			0.000751563	0.000446567	0.0186019	0.000292572	0.000124439	0.30347	0.000100891	0.217478	2.61094					0.706988	6.44546e-05	91.168	933.909	56				0.7064	7.86163e-05
40	Dur01-Seq6-50um		2022-09-05		0.000426902	0.00012374	6.20678e-06	0.000121583	0.00209034	0.00015115	4.22549e-06	0.000119785	-8.85788e-05	0.00012576	0.000670297	0.000126031	7.66073e-06	0.00012238	2.23154e-05	0.000113401	0.000198842	0.000139843		3.29756			0.000812009	0.000491805	0.0194071	0.000302301	0.000123898	0.316431	0.000104504	0.226787	2.72292					0.706958	0.000102808	145.423	891.469	58				0.706364	0.000113055
41	Dur02-Seq6-50um		2022-09-05		0.00042457	0.000120568	5.16667e-06	0.000122616	0.00209109	0.000143776	-1.03386e-06	0.000119023	-9.45623e-05	0.00013229	0.000675355	0.000103719	1.12734e-05	0.000110254	3.08168e-05	0.000114872	0.000220714	0.000145713		3.44491			0.000912967	0.000557161	0.0203362	0.000349653	0.000134242	0.330507	0.000117371	0.236899	2.84459					0.706994	7.07531e-05	100.076	942.824	58				0.706346	8.64702e-05
42	Dur03-Seq6-50um		2022-09-05		0.000420918	0.000129589	1.20341e-05	0.000124971	0.00208662	0.000146061	-6.3283e-06	0.000102562	-9.83124e-05	0.000130966	0.000679578	0.000108715	8.12094e-06	0.000111988	2.59783e-05	0.000123709	0.000229175	0.000138476		3.30397			0.00081907	0.000474433	0.0194452	0.000313423	0.000126184	0.317028	0.000108192	0.227216	2.72819					0.706944	7.21815e-05	102.104	872.42	57				0.706346	9.80423e-05
43	Dur02-Seq1-50um		2022-09-06		0.000429973	0.000122931	9.01796e-06	0.000111614	0.00207051	0.00013946	1.04715e-05	0.000112708	-0.000108974	0.000120155	0.000667479	0.000100631	1.12099e-06	0.000113352	1.86631e-05	0.000120067	0.000157486	0.000129893		3.33811			0.000764198	0.00045371	0.0195656	0.000281874	0.000125089	0.320404	0.000100432	0.229599	2.75645					0.70696	7.7833e-05	110.095	895.027	57				0.70641	9.81744e-05
44	Dur03-Seq1-50um		2022-09-06		0.000424115	0.000130883	6.19314e-06	0.000117144	0.0020703	0.00011766	-2.83481e-06	0.000124792	-0.000101644	0.000119653	0.000671907	0.00011789	-3.14424e-06	0.000123835	2.57487e-05	0.000110724	0.000175881	0.000131579		3.25349			0.000730903	0.000431933	0.0190365	0.000273271	0.000106232	0.312282	9.18016e-05	0.22376	2.68656					0.706888	7.4135e-05	104.875	792.786	58				0.706358	8.41098e-05
45	Dur02-Seq2-50um		2022-09-06		0.000421914	0.000124515	1.10417e-05	0.000113372	0.00205498	0.000144466	5.31148e-06	0.000120777	-9.84282e-05	0.000130402	0.00067125	0.000121694	-5.53879e-06	0.000112633	2.70934e-05	0.000122986	0.000197519	0.000120615		3.30431			0.000729613	0.000429567	0.0193273	0.000278219	0.000107615	0.317144	9.62252e-05	0.227249	2.7285					0.706873	8.19923e-05	115.993	771.076	57				0.706372	8.20969e-05
46	Dur03-Seq2-50um		2022-09-06		0.000421554	0.00010934	8.73644e-06	0.000118002	0.00205574	0.000139648	8.06535e-06	0.000133833	-0.000111405	0.000105971	0.000665587	0.000125046	-7.83485e-07	0.000113963	2.48668e-05	0.000114476	0.000204326	0.000121638		3.31498			0.00080061	0.000471889	0.0194485	0.000326554	0.000126232	0.318194	9.76788e-05	0.228086	2.73731					0.707163	8.12571e-05	114.906	1182.46	58				0.706638	9.37788e-05
47	Dur01-Seq5-50um		2022-09-07		0.000415166	0.000132943	1.42518e-05	0.000127578	0.00204652	0.000119701	6.52607e-06	0.000123234	-9.31724e-05	0.000120214	0.000658938	0.000114026	6.37691e-06	0.000114625	1.38251e-05	0.000123498	0.000121713	0.000123448		3.20718			0.000813122	0.000481103	0.0188897	0.000317053	0.000130088	0.307883	0.000113867	0.220694	2.64837					0.707256	9.46891e-05	133.882	1313.22	58				0.706618	0.000102801
48	Dur02-Seq5-50um		2022-09-07		0.000414833	0.000114408	7.40993e-06	0.000120759	0.00204062	0.00014368	9.12205e-06	0.00012837	-8.43933e-05	0.000126825	0.000650083	0.000109433	1.00265e-05	0.000133919	1.95435e-05	0.000116439	0.000179427	0.00013399		3.50941			0.000981855	0.000595233	0.0207245	0.000372927	0.000149002	0.336708	0.000127986	0.241345	2.89789					0.706999	7.41777e-05	104.919	950.253	59				0.706307	8.4208e-05
49	Dur03-Seq5-50um		2022-09-07		0.000419657	0.000129893	1.24619e-05	0.000119175	0.00202686	0.000152871	3.72428e-06	0.000120523	-9.21484e-05	0.000121244	0.000655556	0.000116939	6.18747e-06	0.00010051	2.67202e-05	0.0001275	0.000207105	0.000132172		3.21656			0.000836538	0.000516183	0.0189652	0.000322813	0.000129876	0.308693	0.000120062	0.221241	2.65603					0.707039	9.17873e-05	129.819	1006.12	58				0.706327	9.66516e-05
50	Dur01-Seq6-50um		2022-09-07		0.000415945	0.000128309	1.3501e-05	0.00011654	0.00202215	0.000122459	-1.09394e-06	0.000119384	-9.90157e-05	0.000126037	0.000651069	0.000112571	3.10115e-06	0.00011335	2.46118e-05	0.000103068	0.000219755	0.000125034		3.55437			0.00103407	0.000631665	0.0210149	0.00040786	0.00015269	0.341015	0.000152003	0.244431	2.93497					0.706969	7.56508e-05	107.007	907.361	57				0.706196	9.15873e-05
51	Dur02-Seq6-50um		2022-09-07		0.000411065	0.000117089	3.60239e-06	0.000121773	0.00202499	0.000141082	-3.06592e-06	0.000112792	-9.83267e-05	0.000115595	0.00065922	0.000122962	9.27023e-06	0.00011915	2.8622e-05	0.00011782	0.000224478	0.000130778		3.4712			0.000993426	0.000615911	0.0205196	0.000396036	0.000147785	0.33303	0.000135944	0.238725	2.86629					0.707034	6.41074e-05	90.6708	999.923	57				0.706259	8.17765e-05
52	Dur03-Seq6-50um		2022-09-07		0.000406157	0.000114314	7.89854e-06	0.000102331	0.00202314	0.000153908	-1.70954e-06	0.000115444	-9.42823e-05	0.000113568	0.000655064	0.000111467	3.45801e-06	0.000113414	2.63571e-05	0.000120467	0.000231811	0.000130759		3.03662			0.000816336	0.000498185	0.0178822	0.000351002	0.000119336	0.291436	0.000113398	0.208892	2.50741					0.707077	9.09156e-05	128.579	1061.12	58				0.706388	0.000100151
																																						Average	0.707106							Average	0.706392
																																						2 s.d.	0.000483702							2 s.d.	0.000163329
																																						2 s.d. ppm	684.059							2 s.d. ppm	231.216
01	Dur01-Seq7-25um		2022-08-30		0.000430414	0.000131392	8.85841e-06	0.000112172	0.00211439	0.000124763	3.61798e-06	0.000104392	-0.000100643	0.000124738	0.000677001	9.73564e-05	-5.49084e-06	0.000121238	1.10803e-05	0.000102413	0.000138761	7.69735e-05		0.905244			0.000256528	0.000154972	0.0053861	9.13647e-05	4.69111e-05	0.0869402	4.61988e-05	0.0623214	0.747415					0.707462	0.000147287	208.19	1604.85	58				0.70639	0.000239859
02	Dur02-Seq7-25um		2022-08-30		0.000442691	0.000104883	5.63444e-06	0.000152145	0.00210452	0.000139441	-8.06867e-06	0.00011441	-9.88424e-05	0.000102731	0.000674087	0.000106933	-6.7741e-06	0.000136744	2.46701e-05	0.00011018	0.000151534	0.000141129		0.915137			0.00023885	0.000149431	0.00544603	0.000111493	4.68823e-05	0.0879103	4.47934e-05	0.0629916	0.755568					0.707219	0.000155913	220.459	1261.51	58				0.706318	0.000235852
03	Dur03-Seq7-25um		2022-08-30		0.000433917	0.000103936	8.72762e-06	0.000119499	0.0021038	0.00013354	1.35883e-05	0.000125265	-8.99792e-05	0.0001294	0.000676033	0.000140438	9.97322e-06	0.000125311	1.97547e-05	0.000127261	0.000159474	0.000138472		0.908408			0.000243422	0.000149891	0.00539819	9.40244e-05	3.82873e-05	0.0872708	2.93308e-05	0.0625271	0.75001					0.70719	0.000124526	176.086	1219.85	58				0.706595	0.000245404
04	Dur01-Seq8-25um		2022-08-30		0.000428904	0.000116526	5.14917e-06	0.000125976	0.00209136	0.000133559	4.76744e-06	9.43685e-05	-0.000102491	0.000131328	0.000678683	0.000108092	9.85201e-06	0.000128888	2.45313e-05	0.000132961	0.000172255	0.000129617		0.905244			0.000252851	0.000158944	0.00541539	9.41329e-05	4.38001e-05	0.0869311	3.37841e-05	0.0623044	0.747378					0.707299	0.000143034	202.225	1374.6	57				0.7065	0.000239542
05	Dur02-Seq8-25um		2022-08-30		0.000436088	0.000124663	1.77878e-06	0.000118982	0.00209973	0.000138589	9.25845e-06	0.000137376	-0.000101076	0.000113279	0.000681399	0.000107266	-6.71817e-06	0.000118701	1.67269e-05	0.000105927	0.000177651	0.000128426		0.892601			0.00023626	0.000153338	0.0053077	9.19587e-05	4.50689e-05	0.085754	3.64249e-05	0.0614522	0.736933					0.707451	0.000123382	174.404	1589.47	55				0.706636	0.000225211
06	Dur03-Seq8-25um		2022-08-30		0.000425377	0.000130307	6.78527e-06	0.000128395	0.00209584	0.000105777	5.65693e-06	0.000107282	-9.49167e-05	0.000162818	0.000673554	0.000109242	-7.02577e-06	0.000115674	2.18469e-05	0.000114232	0.000174552	9.87894e-05		0.896061			0.00024629	0.000140067	0.00531791	8.73794e-05	4.52728e-05	0.0860837	3.60395e-05	0.0616808	0.739791					0.707241	0.000186127	263.174	1292.48	59				0.706567	0.000322922
07	Dur01-Seq9-25um		2022-08-30		0.000432222	0.000140857	-9.78856e-07	0.00010853	0.0020902	0.000122852	4.82406e-06	0.000130573	-0.000100385	0.000123044	0.000675299	0.000118256	-7.3926e-06	0.000105294	1.80263e-05	0.000119441	0.000161923	0.000118321		0.895914			0.000253039	0.000151341	0.00531901	9.53709e-05	4.53731e-05	0.0860447	4.44836e-05	0.0616649	0.739689					0.707302	0.000131242	185.553	1379.27	56				0.706381	0.000238846
08	Dur02-Seq9-25um		2022-08-30		0.000427492	0.000101651	1.55336e-05	0.000111456	0.00209379	0.000152374	1.08409e-05	0.000112775	-0.000103907	0.00014451	0.000665423	0.000113221	2.30791e-06	0.000137781	1.37913e-05	0.000111263	0.000171699	0.000113384		0.939052			0.000262632	0.000154476	0.00559336	9.49303e-05	4.59423e-05	0.0902266	2.43442e-05	0.0646431	0.775304					0.707232	0.000169265	239.334	1279.39	59				0.706727	0.00025333
09	Dur03-Seq9-25um		2022-08-30		0.000449471	0.000108181	1.30886e-05	0.000128913	0.0021457	0.000137258	7.76819e-06	0.000119532	-9.97686e-05	0.000167095	0.000692092	8.8039e-05	-7.31585e-06	9.24882e-05	8.15092e-06	0.000133388	0.000177672	0.000131218		0.896794			0.000237351	0.000130999	0.00532563	8.85459e-05	4.94337e-05	0.0861448	4.77432e-05	0.061741	0.7404					0.707421	0.000153778	217.379	1546.98	58				0.706414	0.000213106
10	Dur02-Seq3-25um		2022-09-02		0.000432383	0.00013249	8.49558e-06	0.000116505	0.00210163	0.000136442	1.44977e-06	0.00011517	-9.98195e-05	0.000128336	0.000662438	0.000113206	-9.79692e-08	0.000122294	8.23013e-06	0.000107577	7.71667e-05	0.000129403		0.840206			0.000260787	0.000157605	0.00498986	0.000102142	4.07002e-05	0.0806622	2.89546e-05	0.0578163	0.693767					0.707176	0.000164961	233.268	1200.22	58				0.706571	0.000254729
11	Dur03-Seq3-25um		2022-09-02		0.000427707	0.000131058	1.03905e-05	0.000123098	0.00209874	0.000130364	-1.07201e-06	0.000103835	-9.97009e-05	0.0001373	0.000664243	0.000110344	3.92385e-06	0.00011167	8.17099e-06	0.000111758	9.80243e-05	0.000131122		0.852941			0.000256997	0.0001678	0.00507104	0.000109711	4.02727e-05	0.0818797	3.45832e-05	0.0586828	0.704262					0.70707	0.000145802	206.205	1050.49	57				0.706264	0.000283673
12	Dur01-Seq4-25um		2022-09-02		0.00042527	0.000123915	1.04678e-05	0.000117977	0.00208526	0.000140171	-1.28922e-06	0.000122291	-9.64732e-05	0.000132512	0.000664736	0.000110323	6.74037e-06	0.000123385	5.55112e-06	0.00012504	9.56285e-05	0.000137702		0.8426			0.000262269	0.000158142	0.005013	0.00010359	3.52525e-05	0.0808984	3.85454e-05	0.0579763	0.695724					0.707139	0.000170452	241.044	1148.31	57				0.706146	0.00029811
13	Dur02-Seq4-25um		2022-09-02		0.000429968	0.000109827	1.43645e-05	0.000109197	0.00209372	0.000140186	-1.42239e-05	0.000113169	-9.85772e-05	0.000140062	0.000666192	0.000108101	-2.91825e-06	0.000123189	4.32878e-06	0.00011617	0.00010622	0.000129441		0.850423			0.000256495	0.000151139	0.00505258	0.000102112	4.1398e-05	0.0816321	4.04885e-05	0.0585089	0.702174					0.707285	0.000165866	234.511	1354.29	56				0.706185	0.000227527
14	Dur03-Seq4-25um		2022-09-02		0.000429972	0.00013	1.03925e-05	0.000122244	0.00208985	0.000133637	-9.08809e-06	0.000123244	-9.60645e-05	0.000130078	0.000663993	0.000124246	5.88372e-06	0.000122726	7.97672e-06	0.000116513	0.000105447	0.000122105		0.842567			0.000251274	0.0001645	0.00500498	9.76439e-05	3.76888e-05	0.0808679	2.67752e-05	0.0579689	0.695686					0.707236	0.000182295	257.757	1284.91	59				0.706636	0.000245059
15	Dur01-Seq6-25um		2022-09-06		0.00040646	0.000125114	6.08897e-06	0.000133239	0.00196712	0.00014168	5.34263e-07	0.000110816	-9.51855e-05	0.000113199	0.000630676	0.000100831	-2.23456e-06	0.000106595	1.74293e-05	0.000104211	0.00012882	0.000115381		0.916007			0.000249252	0.000147065	0.00539522	8.75411e-05	3.51117e-05	0.0879181	2.64779e-05	0.0630062	0.75631					0.707001	0.000157481	222.745	953.146	56				0.706518	0.000225755
16	Dur02-Seq6-25um		2022-09-06		0.000407713	0.000120114	1.00103e-05	0.000117619	0.00197783	0.000136236	-1.42831e-06	0.00012121	-9.30725e-05	0.000117528	0.000632965	0.00011123	-8.00893e-06	0.000121459	1.41268e-05	0.000116146	0.000132529	0.000125619		0.909139			0.000246968	0.000146117	0.00534705	8.52748e-05	4.3193e-05	0.0872596	2.03039e-05	0.0625267	0.750636					0.70697	0.000173693	245.686	908.714	58				0.706657	0.000268032
17	Dur03-Seq6-25um		2022-09-06		0.000405236	0.000124728	1.41649e-05	0.000119726	0.00197176	0.000136873	-4.92738e-06	0.000106164	-9.96946e-05	0.000132891	0.000631858	0.000103618	-5.90737e-06	0.000116249	1.37974e-05	0.000120978	0.000133602	0.000129725		0.915314			0.000256868	0.000143823	0.00539662	0.000108447	3.80052e-05	0.0878683	4.10136e-05	0.0629617	0.755733					0.707043	0.000158984	224.858	1012.19	57				0.706035	0.000265709
18	Dur01-Seq7-25um		2022-09-06		0.000413045	0.000143316	6.37333e-06	0.000117411	0.00198123	0.000156422	5.44473e-06	0.000127212	-9.36758e-05	0.000115679	0.000634224	0.000102361	-7.22843e-06	0.000103539	1.39553e-05	0.000126145	0.000117813	0.000116853		0.458634			0.000129338	7.62096e-05	0.00276449	5.57222e-05	2.0246e-05	0.0451452	1.64704e-05	0.0323475	0.388333					0.707009	0.00015706	222.147	964.084	58				0.706218	0.000240104
19	Dur02-Seq7-25um		2022-09-06		0.000407276	0.000111737	7.40756e-06	0.000121422	0.0019811	0.000149473	6.1773e-05	0.00011729	-0.000102792	0.000118246	0.000636941	0.000118752	-7.00259e-06	0.000112494	1.44711e-05	0.000112389	0.000117117	0.000108237		0.927054			0.000254959	0.000157366	0.00546638	9.18028e-05	3.45093e-05	0.0889742	3.4383e-05	0.0637631	0.765445					0.707008	0.000139783	197.71	962.779	58				0.706238	0.000253057
20	Dur03-Seq7-25um		2022-09-06		0.000409913	0.000107202	5.98966e-06	0.000121612	0.00197682	0.00013781	6.41218e-06	0.000118239	-0.000100695	0.000133851	0.00063517	0.000117591	-7.37504e-06	0.000124734	1.4415e-05	0.000123775	0.000127645	0.000111399		0.922729			0.000252537	0.000160691	0.00544843	0.000104873	4.27604e-05	0.0885728	2.55586e-05	0.0634689	0.761859					0.707055	0.000166601	235.626	1029.83	58				0.706421	0.000238133
																																						Average	0.70719							Average	0.706421
																																						2 s.d.	0.000305212							2 s.d.	0.000390516
																																						2 s.d. ppm	431.584							2 s.d. ppm	552.809
01	Dur01-Seq1-13um		2022-08-30		0.000442541	0.000140004	1.02379e-05	0.000131479	0.00213388	0.000154425	7.3594e-06	0.000115714	-0.000101511	0.000148227	0.000683583	0.00012079	4.80086e-07	0.000139407	2.86903e-05	0.000140739	0.000116863	0.000117827		0.237989			7.74895e-05	4.94127e-05	0.00143972	3.12788e-05	2.65311e-05	0.0228488	1.16376e-05	0.0163628	0.196417					0.706685	0.000483812	684.621	505.989	56				0.705943	0.000888362
02	Dur02-Seq1-13um		2022-08-30		0.000446183	0.000111858	7.13228e-06	0.000125096	0.00215171	0.000141566	-4.47273e-06	0.00012752	-8.48313e-05	0.000140671	0.000682111	0.000141757	9.07387e-06	0.000127934	1.35853e-05	0.000136386	0.00011387	0.00010554		0.227842			7.65313e-05	5.60595e-05	0.00134316	3.34419e-05	-1.59277e-06	0.0218776	5.6675e-06	0.0156803	0.18804					0.70723	0.000486866	688.412	1276.5	57				0.70698	0.000879679
03	Dur03-Seq1-13um		2022-08-30		0.000442469	0.000115753	1.21949e-05	0.000103765	0.00214404	0.000122817	-3.35668e-07	9.76883e-05	-0.000102942	0.000136276	0.000693687	0.00012177	5.74211e-07	0.000100478	2.19336e-05	0.000119207	0.000102373	9.2516e-05		0.22728			7.66075e-05	3.11259e-05	0.0013506	2.38649e-05	4.56746e-06	0.0218201	1.51117e-05	0.0156273	0.187583					0.706878	0.000446233	631.273	778.477	55				0.705773	0.000819931
04	Dur01-Seq2-13um		2022-08-30		0.000438015	0.000117476	-1.64313e-06	0.000111156	0.00213368	0.000131767	1.3853e-05	0.000118	-9.87506e-05	0.000139749	0.000669922	0.000113189	3.42521e-06	0.000114155	1.68405e-05	0.000122975	0.000106844	0.000109833		0.223765			7.62936e-05	4.77214e-05	0.00134529	1.1793e-05	-9.48788e-06	0.0215038	5.35275e-06	0.0153824	0.184676					0.706535	0.000522186	739.08	293.152	56				0.705753	0.00088162
05	Dur02-Seq2-13um		2022-08-30		0.000436945	0.000111275	2.63161e-06	0.000124521	0.00214542	0.00013131	1.1575e-05	9.23151e-05	-0.000110819	0.000131163	0.00067283	0.000113156	2.62101e-06	0.000128181	5.49396e-06	0.000103903	0.000104488	0.000123839		0.231302			7.47681e-05	4.08178e-05	0.00138845	2.65819e-05	2.3963e-05	0.0222246	1.99471e-05	0.0159184	0.190908					0.706798	0.000490287	693.673	665.433	56				0.705081	0.000795911
06	Dur03-Seq2-13um		2022-08-30		0.000448688	0.000122634	-5.55477e-06	0.000111594	0.00213239	0.000158823	2.72851e-06	0.000103089	-9.0682e-05	0.000115952	0.000685573	0.000131596	8.62416e-06	0.000112356	8.11594e-06	0.000100832	0.000101202	0.000156836		0.228321			7.8824e-05	4.41654e-05	0.00136612	2.74687e-05	4.80995e-06	0.0219272	1.34548e-05	0.0157099	0.188449					0.707125	0.000525404	743.014	1128.92	57				0.705516	0.000787626
07	Dur01-Seq1-13um		2022-08-30		0.000457173	0.00012443	1.57218e-05	0.000122547	0.00225942	0.000152205	3.95489e-06	0.000124416	-0.000102915	0.000117432	0.000729019	0.000131526	-2.91699e-06	0.00012363	1.65269e-05	0.000112023	0.000114357	9.85113e-05		0.247685			0.000183278	0.000121087	0.00154489	8.48804e-05	2.39905e-06	0.0237905	1.50888e-05	0.0170466	0.204422					0.707341	0.000445856	630.327	1434.09	57				0.706121	0.000785316
08	Dur02-Seq1-13um		2022-08-30		0.000458659	0.000125809	1.25358e-05	0.000108556	0.00224451	0.000160255	5.27121e-07	0.000131775	-9.67979e-05	0.000134434	0.000722199	9.7918e-05	7.94058e-07	9.31562e-05	1.16764e-05	0.000110095	0.000116117	0.000115132		0.245374			0.000175408	0.000107697	0.00153324	8.01473e-05	5.97939e-06	0.0235631	1.43449e-05	0.0168978	0.202511					0.707726	0.000430135	607.77	1979.95	55				0.706635	0.000969407
09	Dur03-Seq1-13um		2022-08-30		0.000457935	0.000110115	1.30772e-05	0.000110951	0.002223	0.00014936	5.4769e-06	0.000112907	-9.91439e-05	0.000139254	0.000715018	0.000104712	3.96763e-06	0.000125453	1.30466e-05	0.000113582	0.000114217	0.000141367		0.228513			0.00015392	9.77962e-05	0.00141482	6.44925e-05	1.00273e-05	0.0219419	1.94484e-05	0.0157305	0.188592					0.707328	0.000485597	686.523	1416.36	56				0.705499	0.000787264
10	Dur01-Seq3-13um		2022-08-30		0.000435353	0.000113652	2.43035e-06	0.000121949	0.00211747	0.000133745	5.03442e-06	0.000111211	-9.21285e-05	0.000124768	0.000687285	0.000114143	3.78185e-06	0.000107033	1.50989e-05	0.000121185	9.45639e-05	0.000110289		0.268556			0.000129382	9.84791e-05	0.00163573	4.00291e-05	1.70146e-06	0.0257737	1.07307e-05	0.0184791	0.221676					0.707474	0.000499811	706.474	1621.83	59				0.706164	0.000862777
11	Dur02-Seq3-13um		2022-08-30		0.000438407	0.000119738	1.56109e-05	0.000109613	0.00212217	0.000130589	-1.46937e-06	0.000138508	-0.000100624	0.000118144	0.000681798	0.000133094	-3.49543e-07	0.000104559	1.62174e-05	0.000102785	9.29513e-05	0.000105116		0.255392			0.000126073	7.66036e-05	0.00156	5.57889e-05	2.09401e-05	0.024517	2.53505e-05	0.0175709	0.210808					0.707454	0.00039727	561.549	1594.09	57				0.70553	0.000706144
12	Dur02-Seq3-13um		2022-08-30		0.000430124	0.000121877	4.01786e-07	0.000132068	0.00212882	0.000145813	1.61446e-05	0.000124141	-0.000106969	0.00013122	0.000680785	8.42666e-05	8.79442e-06	9.78396e-05	1.66704e-05	0.000124596	8.89685e-05	0.000117616		0.253426			0.000135928	8.92144e-05	0.00153495	3.53172e-05	2.17314e-05	0.0243283	1.11827e-05	0.0174373	0.209186					0.707221	0.000441538	624.328	1264.39	58				0.706611	0.000732285
13	Dur01-Seq4-13um		2022-08-30		0.00044542	0.000100366	7.7963e-06	9.39764e-05	0.00213828	0.000129519	8.56779e-07	0.000117722	-9.85062e-05	0.000115673	0.000679314	0.0001169	1.27692e-05	0.000111196	1.55725e-05	0.000126119	0.000104075	0.000109889		0.253018			0.000118573	7.40898e-05	0.00155136	5.78138e-05	1.64149e-05	0.0243014	8.77114e-06	0.0174137	0.208838					0.707361	0.0004446	628.533	1462.75	58				0.706168	0.000742065
14	Dur02-Seq4-13um		2022-08-30		0.000440617	0.000113227	1.03845e-05	0.000112912	0.00213483	0.000148305	1.06417e-05	0.000145975	-0.0001051	0.000111607	0.000679781	0.000107818	-1.07697e-06	0.000110886	1.25034e-05	0.000110014	0.000104774	0.000118104		0.263619			0.000132702	7.74489e-05	0.00159272	4.87087e-05	2.32535e-05	0.0253154	1.42211e-05	0.0181413	0.217592					0.707512	0.000469902	664.16	1676.46	58				0.70611	0.0009523
15	Dur03-Seq4-13um		2022-08-30		0.000440762	0.000113625	1.13337e-06	0.000119103	0.00211775	0.000156383	1.44984e-05	0.000115349	-0.000107102	0.000108737	0.000689841	0.00011264	-2.18291e-06	0.000117652	2.12249e-05	0.000121022	0.000100066	0.000111723		0.253606			0.000120501	8.77723e-05	0.0015526	3.82645e-05	1.71693e-06	0.0243456	1.54855e-05	0.0174435	0.209328					0.706907	0.000453055	640.898	819.232	55				0.705707	0.00102959
16	Dur01-Seq5-13um		2022-08-30		0.000439461	0.000151276	1.0962e-05	0.000120019	0.00209594	0.000154893	9.95684e-06	0.000148741	-8.56269e-05	0.000130803	0.000663988	0.000122701	4.11319e-06	0.000118934	9.02112e-06	0.000121243	8.82512e-05	0.000101653		0.251486			0.000114296	8.13785e-05	0.00155436	5.48949e-05	-4.34494e-06	0.0241528	1.44431e-05	0.0173175	0.207587					0.707488	0.000407658	576.205	1642.42	56				0.70621	0.000776591
17	Dur02-Seq5-13um		2022-08-30		0.000444441	0.000109843	7.36529e-06	9.41632e-05	0.00213232	0.000147301	1.93492e-06	0.00010338	-9.24668e-05	0.000116794	0.000680086	0.000116727	3.72889e-06	0.000129909	2.07846e-05	0.000118146	9.41937e-05	0.000129535		0.2498			0.000126623	9.26191e-05	0.00153021	5.40815e-05	7.15651e-06	0.0239879	1.53335e-05	0.0171884	0.206188					0.707219	0.000556498	786.882	1261.98	56				0.706169	0.000923255
18	Dur03-Seq5-13um		2022-08-30		0.000444169	0.000132414	1.84463e-05	0.000122136	0.00214967	0.00014179	4.7344e-06	0.000142488	-0.000105091	0.000143592	0.000688214	0.00010383	-3.43397e-06	0.000108519	1.78167e-05	0.000139861	9.43582e-05	0.000127503		0.250435			0.000137399	6.93739e-05	0.00157425	5.87516e-05	1.60043e-05	0.0240632	2.14798e-05	0.0172423	0.20671					0.707673	0.000421154	595.124	1904.74	56				0.705911	0.000786056
19	Dur01-Seq6-13um		2022-08-30		0.000476747	0.000134165	5.2876e-06	0.000111504	0.0022884	0.000223592	1.35072e-05	0.000136434	-8.76045e-05	0.000125621	0.000723413	0.000116281	8.26501e-06	0.000127703	1.04914e-05	0.000108454	9.62132e-05	0.000139327		0.216786			5.88396e-05	4.7049e-05	0.00129015	2.2984e-05	4.50517e-06	0.020798	9.09595e-06	0.0149003	0.178931					0.706811	0.000482155	682.155	684.33	56				0.706099	0.00102536
20	Dur02-Seq6-13um		2022-08-30		0.000469352	0.000114733	1.25044e-05	0.000133538	0.0022762	0.000156971	-5.84426e-06	0.000100058	-9.7359e-05	0.000118188	0.000729315	0.000108942	5.51455e-06	0.000116323	1.55905e-05	0.000108547	0.000107427	0.000107291		0.219493			6.50626e-05	2.72559e-05	0.00129052	3.80028e-05	7.5345e-06	0.0210502	1.79485e-05	0.0150941	0.181152					0.707537	0.000533081	753.433	1711.24	56				0.705519	0.00101633
21	Dur03-Seq6-13um		2022-08-30		0.000467204	0.00012631	1.20493e-05	0.00013465	0.00226123	0.000133855	8.62926e-06	0.000141796	-8.61559e-05	0.000131291	0.000728581	0.000121472	8.87404e-06	0.000114164	1.12788e-05	0.00012388	0.000100989	0.000137498		0.2205			7.44816e-05	3.04762e-05	0.00131764	2.30128e-05	4.39937e-06	0.0211674	1.65675e-05	0.0151708	0.181991					0.707276	0.000515885	729.398	1341.75	58				0.705753	0.00118129
22	Dur01-Seq1-13um		2022-09-01		0.000421531	0.000118014	1.34086e-05	0.000132105	0.00205471	0.000132685	-4.10358e-07	9.8478e-05	-8.79568e-05	0.000119341	0.000668542	0.000116531	5.98655e-07	0.000123483	1.74677e-05	0.00014183	0.00015896	0.000113779		0.216914			8.35393e-05	3.48889e-05	0.00127952	1.55769e-05	6.64482e-06	0.0207905	7.95715e-06	0.0149052	0.178967					0.707061	0.000446848	631.979	1038.02	56				0.706196	0.000916133
23	Dur02-Seq1-13um		2022-09-01		0.00044054	0.000112453	1.34061e-05	0.000160831	0.00206674	0.000126729	-2.12723e-06	0.000141558	-9.24919e-05	0.000124488	0.000676538	0.000136127	2.59167e-06	0.000105675	1.62805e-05	0.000105014	0.000154043	0.000130274		0.216289			6.49332e-05	3.2712e-05	0.00128846	1.59945e-05	1.26956e-08	0.0207321	1.36109e-05	0.0148522	0.178454					0.70648	0.000506134	716.416	215.512	56				0.705052	0.00116829
24	Dur03-Seq1-13um		2022-09-01		0.000439819	0.000100519	2.99725e-06	0.000129046	0.00207139	0.000135278	-9.12732e-06	0.000108793	-9.62421e-05	0.000119605	0.000672314	0.00010894	-5.48765e-06	0.000110895	2.42654e-05	0.000129788	0.000151552	0.000111818		0.225168			6.21654e-05	5.23167e-05	0.00133018	2.95852e-05	1.45113e-05	0.0215769	1.95325e-05	0.015467	0.185795					0.707114	0.000562967	796.147	1113.48	57				0.704641	0.000868872
25	Dur01-Seq3-13um		2022-09-02		0.000432792	0.000131483	1.27029e-05	0.000126932	0.00210371	0.000142572	-2.88454e-06	0.00010562	-9.83139e-05	0.000120517	0.000658508	0.000122505	-2.29731e-06	0.00011578	7.60176e-06	0.000108391	8.50776e-05	0.000119591		0.217669			6.71132e-05	4.42249e-05	0.00128932	3.0452e-05	9.66361e-06	0.0208758	1.56043e-05	0.0149732	0.179665					0.707514	0.000468924	662.777	1678.57	56				0.706194	0.000828107
26	Dur01-Seq5-13um		2022-09-06		0.000416817	0.000108286	8.46089e-06	0.000125434	0.00204094	0.000151085	-7.26139e-07	0.000106985	-8.99339e-05	0.00012188	0.000647463	0.000129047	5.19123e-06	0.000115504	4.31614e-06	0.000117338	7.41371e-05	0.000114867		0.220027			6.74133e-05	4.28553e-05	0.00129844	3.21473e-05	3.13108e-06	0.0210911	-1.89667e-06	0.0151187	0.181624					0.706899	0.000601252	850.549	808.104	58				0.706833	0.000915751
27	Dur02-Seq5-13um		2022-09-06		0.000422339	0.000123512	9.61292e-06	0.00011497	0.00203901	0.000139101	7.2974e-06	9.87191e-05	-9.25436e-05	0.000119	0.000643334	0.000116607	-5.53273e-06	0.000123617	1.12784e-05	0.000114596	7.37602e-05	0.000111744		0.227813			6.24457e-05	3.95383e-05	0.00134636	2.67075e-05	7.18325e-06	0.0218408	1.0227e-05	0.0156534	0.188051					0.706657	0.000472231	668.261	466.076	58				0.70558	0.000932305
28	Dur01-Seq5-13um		2022-09-06		0.000422895	0.000132096	1.20393e-05	0.000123953	0.00203656	0.000145479	-2.32471e-07	0.000122009	-0.000101227	0.000121761	0.000650186	0.000108124	7.40629e-07	0.000123839	7.7075e-06	0.00011507	7.11745e-05	0.000115689		0.21626			6.48436e-05	3.01481e-05	0.00128174	2.36342e-05	1.64761e-05	0.0207346	5.45908e-06	0.0148632	0.178514					0.706986	0.000554783	784.715	931.85	55				0.706434	0.00103124
																																						Average	0.707153							Average	0.705935
																																						2 s.d.	0.000691978							2 s.d.	0.00106905
																																						2 s.d. ppm	978.541							2 s.d. ppm	1514.37
01	Dur01-Seq3-10um		2022-09-06		0.000420828	0.000106949	7.53756e-06	0.000108622	0.00204461	0.000134011	4.69433e-06	0.000107926	-0.000107548	0.00011796	0.000663917	0.000119661	-3.66191e-06	0.000113082	2.07082e-05	0.000135301	0.00019563	0.00013542		0.118557			3.44299e-05	2.95361e-05	0.000695094	7.91827e-06	1.46868e-05	0.0113494	-3.09329e-06	0.0081449	0.0977084					0.70807	0.000954314	1347.77	2466.18	55				0.707104	0.00177274
02	Dur02-Seq3-10um		2022-09-06		0.000417013	0.000125244	4.94687e-06	0.00012394	0.00204795	0.000141806	-2.45447e-06	0.000112822	-9.76878e-05	0.000121187	0.000657975	0.000115705	-3.74368e-06	0.000116458	1.1311e-05	0.000120354	0.00012783	0.00011874		0.118288			3.59028e-05	2.94167e-05	0.000697067	1.99941e-05	-3.46363e-06	0.0113368	3.64634e-06	0.00811837	0.0975537					0.705834	0.00110422	1564.42	-699.28	57				0.70482	0.00196587
03	Dur03-Seq3-10um		2022-09-06		0.000413208	0.000118945	1.45232e-05	0.000130225	0.00204577	0.000133603	-6.14039e-08	0.000131444	-0.000100187	0.000126147	0.000660318	0.000109184	-1.62825e-06	0.000115933	1.11609e-05	0.000104528	0.000106297	0.000121497		0.115037			3.61864e-05	1.65509e-05	0.000668268	1.40771e-05	-2.90475e-06	0.0110105	4.68478e-07	0.00790078	0.0948906					0.707352	0.0012328	1742.83	1449.48	57				0.706028	0.00162389
04	Dur01-Seq4-10um		2022-09-06		0.000419715	0.000129897	1.10667e-05	0.000131357	0.00204005	0.00015107	-1.87641e-06	0.000122321	-9.92705e-05	0.000125148	0.000651657	0.00012254	-1.76427e-06	0.000117014	6.58195e-06	0.000113983	9.26096e-05	0.000131095		0.119546			3.27186e-05	1.38359e-05	0.000701325	7.74811e-06	6.56076e-06	0.0114557	1.02093e-05	0.00822007	0.0986294					0.707736	0.000999779	1412.64	1993.61	55				0.705612	0.00250896
05	Dur02-Seq4-10um		2022-09-06		0.000416481	0.000132434	1.24907e-05	0.000138434	0.00203954	0.000152843	-8.4801e-06	0.000108881	-9.62638e-05	0.000138539	0.000646085	0.00013023	2.26885e-07	0.000111287	4.37611e-06	0.000100523	8.753e-05	0.000124026		0.112686			3.30894e-05	1.20272e-05	0.000662404	1.52761e-05	1.54801e-06	0.0108019	-3.6071e-06	0.00774759	0.0929663					0.707961	0.00102142	1442.76	2311.5	58				0.706447	0.00188276
06	Dur03-Seq4-10um		2022-09-06		0.000422885	0.000126072	1.26156e-05	0.000134676	0.00203929	0.000137424	2.68053e-06	0.000112459	-9.23263e-05	0.000122212	0.000646224	0.000117449	1.14783e-06	0.000129943	4.43052e-06	0.000113563	7.98669e-05	0.0001292		0.115786			2.79739e-05	2.21132e-05	0.000684018	9.06956e-06	1.07968e-07	0.011103	1.60562e-06	0.00795862	0.0955349					0.707065	0.000965121	1364.97	1043.24	56				0.707026	0.00202784
07	Dur01-Seq8-10um		2022-09-06		0.000406658	0.000123974	6.1335e-06	0.000122565	0.0019658	0.000140253	1.1408e-05	0.000127195	-8.75899e-05	0.000125731	0.000621957	0.000109271	3.98281e-06	0.000111338	1.23421e-05	0.000110454	9.97658e-05	0.000118577		0.127192			4.76647e-05	1.40458e-05	0.000774894	2.62114e-05	8.80107e-06	0.0121958	-2.81871e-07	0.00874301	0.104937					0.707209	0.000876499	1239.38	1247.79	56				0.706016	0.00185989
08	Dur02-Seq8-10um		2022-09-06		0.000408142	0.000119139	8.28304e-06	0.000113393	0.00198344	0.00013562	1.34092e-05	0.000115658	-8.96971e-05	0.000119338	0.000624918	0.000115665	-1.41407e-06	0.000122512	1.84276e-05	0.00011769	9.70849e-05	0.000109274		0.130292			3.99691e-05	2.92356e-05	0.000775034	1.69499e-05	4.91827e-07	0.0124904	7.2594e-06	0.00894923	0.107498					0.706941	0.000782188	1106.44	867.746	55				0.705132	0.0020334
09	Dur03-Seq8-10um		2022-09-06		0.000409779	0.000123056	1.18328e-05	0.000116366	0.00198272	0.000143607	1.41857e-05	0.000107641	-9.24587e-05	0.000125255	0.000624866	0.000124205	5.91305e-06	0.000120842	1.7247e-05	0.000135677	9.11941e-05	0.000129404		0.127084			3.83545e-05	1.24907e-05	0.000749418	1.82122e-05	1.25168e-05	0.0121805	-6.53433e-06	0.00872873	0.104853					0.706626	0.000785545	1111.68	421.344	56				0.706859	0.00171922
10	Dur01-Seq7-10um		2022-09-07		0.000413113	0.000120286	7.96107e-06	0.0001071	0.00201061	0.000144531	5.13887e-06	0.000111648	-9.89537e-05	0.000112162	0.000646004	0.000121939	4.83839e-07	0.000106282	2.38129e-05	0.000118198	0.000162412	0.000122608		0.112355			3.90373e-05	1.89125e-05	0.000670799	2.04901e-05	5.84235e-06	0.0107589	9.34233e-06	0.00771129	0.0926212					0.707331	0.0010217	1444.44	1419.68	56				0.704919	0.00157787
11	Dur02-Seq7-10um		2022-09-07		0.000408692	0.000117745	1.03134e-05	0.000137477	0.00202103	0.000130932	6.60091e-06	0.0001101	-9.89091e-05	0.000125655	0.000642509	0.000122269	3.2559e-06	0.000111873	2.15144e-05	0.000115192	0.000123548	0.000126118		0.107013			3.11788e-05	1.17114e-05	0.00063363	1.40901e-05	7.31717e-06	0.010237	4.35132e-06	0.00734312	0.0882512					0.706641	0.00111271	1574.64	442.582	58				0.705412	0.0024664
12	Dur03-Seq7-10um		2022-09-07		0.000408952	0.000125958	1.00704e-05	0.000126174	0.00202004	0.000146196	5.33405e-06	0.000117266	-9.60584e-05	0.000132456	0.000636344	0.00011422	8.246e-06	0.000119156	1.52149e-05	0.000115539	0.000109377	0.000122635		0.110167			4.53561e-05	2.47946e-05	0.000655047	1.8198e-05	7.35808e-06	0.0105599	-3.20366e-06	0.007558	0.090867					0.706109	0.000963427	1364.42	-309.859	57				0.705422	0.00211778
13	Dur01-Seq8-10um		2022-09-07		0.000411396	0.000127636	1.02982e-05	0.000112297	0.00201864	0.000123166	1.43512e-05	0.000106966	-9.76334e-05	0.00012605	0.000639395	0.000115164	1.58583e-05	0.000122552	1.15217e-05	0.000118873	9.78239e-05	0.000116246		0.109444			3.88262e-05	2.13214e-05	0.000650817	1.19528e-05	9.52331e-06	0.0104847	-1.7148e-06	0.00751763	0.0902824					0.70673	0.00104274	1475.45	569.17	58				0.70742	0.00180321
14	Dur02-Seq8-10um		2022-09-07		0.000409764	0.000111196	8.00077e-06	0.000110539	0.00202722	0.000137782	6.69202e-06	0.000113303	-8.94804e-05	0.000128024	0.000644005	0.000115587	6.17884e-06	0.000120357	1.12395e-05	0.000113816	8.76218e-05	0.000124262		0.108721			4.15163e-05	1.38868e-05	0.000637144	1.25461e-05	9.90925e-06	0.0104171	9.44035e-06	0.00746822	0.0896953					0.70706	0.00133011	1881.19	1035.98	56				0.704787	0.00201971
15	Dur03-Seq8-10um		2022-09-07		0.00040437	0.000126559	4.2042e-06	0.000117106	0.00202337	0.000129555	1.33849e-05	0.000106208	-9.60486e-05	0.000128744	0.000642542	0.000125117	7.51442e-06	0.00010861	1.37926e-05	0.000123394	8.44075e-05	0.000123336		0.107661			5.19322e-05	2.7101e-05	0.000650667	1.08148e-05	3.01056e-06	0.0103116	1.18065e-07	0.00738948	0.0888257					0.706919	0.00101884	1441.24	836.953	56				0.706747	0.00207467
16	Dur01-Seq9-10um		2022-09-07		0.00041665	0.00011606	7.72133e-06	0.000123937	0.00202463	0.000141727	1.28076e-05	0.000125173	-9.46237e-05	0.000130455	0.000640277	0.000110153	4.33951e-06	0.000129765	1.53019e-05	0.000130938	7.5027e-05	0.000130203		0.112817			4.25471e-05	3.33226e-05	0.000683948	1.56145e-05	4.05506e-06	0.010808	2.60751e-06	0.0077517	0.0930882					0.706978	0.000935016	1322.55	920.689	55				0.706192	0.00223784
17	Dur02-Seq9-10um		2022-09-07		0.000412188	0.000117537	8.58299e-06	0.000124176	0.00203732	0.000144214	1.51616e-05	0.000120271	-0.000105596	0.00013063	0.000641038	0.000121711	-1.12269e-06	0.000127797	1.31541e-05	0.000104074	7.75773e-05	0.000116999		0.106855			3.89908e-05	1.93869e-05	0.000626704	7.6273e-06	8.24517e-06	0.0102359	5.92345e-06	0.00733096	0.0881608					0.70546	0.00118551	1680.48	-1228.6	57				0.703158	0.00221444
18	Dur03-Seq9-10um		2022-09-07		0.000413547	0.000129429	5.37826e-06	0.000121702	0.00202994	0.00012791	1.38946e-05	0.000125545	-9.05173e-05	0.000113991	0.000643864	0.000121001	8.29712e-06	0.000107963	1.3308e-05	0.000110028	7.08128e-05	0.000113038		0.108442			4.78417e-05	3.19264e-05	0.000641785	1.11293e-05	-5.04214e-06	0.0103946	9.07657e-07	0.00744995	0.0894826					0.707158	0.00086107	1217.65	1175.37	54				0.706581	0.00178364
19	Dur01-Seq10-10um		2022-09-07		0.000416508	0.000110717	1.16417e-05	0.000108895	0.0020391	0.000132795	1.26463e-05	0.000105023	-9.40108e-05	0.000110329	0.000639789	0.000119729	4.48621e-06	0.000116465	1.86793e-05	0.000111458	6.76613e-05	0.000123533		0.10844			3.89982e-05	2.29876e-05	0.000637026	4.85399e-06	6.044e-07	0.0103895	-1.45721e-06	0.00745088	0.0894794					0.707241	0.0009494	1342.4	1292.12	55				0.707394	0.00182085
20	Dur02-Seq10-10um		2022-09-07		0.000418761	0.000137372	1.10758e-05	0.00012336	0.00203442	0.000147502	5.9974e-06	0.00012273	-9.68394e-05	0.000134072	0.000638435	0.000103998	8.31881e-06	0.000108236	1.72511e-05	0.000122318	6.83183e-05	0.000126731		0.107463			3.51924e-05	3.10003e-05	0.000633156	1.35093e-05	3.20921e-06	0.0103019	-1.53412e-06	0.00738375	0.0886763					0.707386	0.00114373	1616.84	1497.8	56				0.707593	0.00194702
21	Dur03-Seq10-10um		2022-09-07		0.000423125	0.000109971	1.10709e-05	0.000128656	0.00202806	0.000151108	1.39045e-05	0.000119647	-0.000105734	0.000141235	0.000639526	0.000115259	5.31526e-06	0.000117736	1.89159e-05	9.71632e-05	6.5241e-05	0.000118318		0.108931			2.88248e-05	2.51495e-05	0.000661269	4.19557e-06	1.25585e-05	0.0104546	3.89659e-06	0.00748973	0.0898925					0.706876	0.00095067	1344.89	775.36	54				0.70632	0.00222771
																																						Average	0.706985							Average	0.706047
																																						2 s.d.	0.00126598							2 s.d.	0.00220838
																																						2 s.d. ppm	1790.68							2 s.d. ppm	3127.8
01	Ipira01-Seq7-50um		2022-08-30		0.000419396	0.00013125	8.38086e-06	0.000133943	0.00200011	0.000136765	-3.7069e-07	0.00014024	-0.000121197	0.000116624	0.000680632	0.000115264	8.63388e-06	0.000150699	4.24385e-05	0.000112788	0.000405427	0.000137682		2.35844			0.000383629	0.000186797	0.0141795	0.000127555	6.59073e-05	0.22652	5.57642e-05	0.163199	1.94719					0.71108	8.43848e-05	118.671	834.741	58				0.710589	0.000109954
02	Ipira02-Seq7-50um		2022-08-30		0.000422793	0.000107691	9.28209e-06	0.000126942	0.00200367	0.000150733	1.53413e-05	0.000133023	-0.000125871	9.57236e-05	0.000674502	9.25933e-05	6.09934e-06	0.000145119	4.12992e-05	0.000122005	0.000384836	0.000124801		2.6097			0.000494571	0.000255014	0.0157847	0.000162404	7.90556e-05	0.250691	6.178e-05	0.180593	2.1547					0.711014	6.74202e-05	94.8227	741.73	56				0.710584	0.000104845
03	Ipira03-Seq7-50um		2022-08-30		0.000419122	0.000125925	1.1055e-05	0.000128112	0.00200515	0.000123557	1.77217e-06	0.000130349	-0.000102988	0.000119505	0.000679675	0.000114149	1.21639e-06	0.000118852	4.77064e-05	0.000110671	0.000365406	0.000118059		2.37508			0.000365848	0.000164578	0.0142553	0.000122222	4.41842e-05	0.228115	4.55356e-05	0.164318	1.96098					0.710936	9.1321e-05	128.452	632.617	56				0.710558	0.000113981
04	Ipira01-Seq8-50um		2022-08-30		0.00041612	0.000109477	5.70684e-06	0.000147898	0.00200015	0.000135183	-1.82995e-06	9.10975e-05	-0.000118317	0.000134087	0.000669465	0.000112497	4.31533e-06	8.72804e-05	4.50136e-05	0.000134411	0.000353327	0.000102295		2.38216			0.000379049	0.000181174	0.0143155	0.000130573	5.35728e-05	0.228822	4.25916e-05	0.164844	1.96682					0.711003	8.97043e-05	126.166	726.215	56				0.710661	0.000119474
05	Ipira01-Seq8-50um		2022-08-30		0.000411479	9.19399e-05	7.13121e-06	0.000112744	0.00200522	0.000171044	-8.99773e-08	0.00011182	-0.000121126	0.000119011	0.00067072	0.000106031	3.49912e-06	8.89606e-05	5.09651e-05	0.000126831	0.000358889	0.000115163		2.36543			0.000366411	0.000180891	0.0142252	0.000121473	5.66869e-05	0.227224	4.67694e-05	0.163672	1.95302					0.710962	0.00011022	155.029	669.23	58				0.710604	0.000135298
06	Ipira03-Seq8-50um		2022-08-30		0.000423707	0.000147287	7.27689e-06	0.000105656	0.00200269	0.000131492	6.8215e-06	0.000105914	-0.00011559	9.57915e-05	0.000672168	0.000102004	1.76352e-06	0.000120528	4.09826e-05	0.000128002	0.000336972	0.000140229		2.53998			0.000429327	0.000215655	0.0153124	0.000140964	6.91183e-05	0.243982	5.95187e-05	0.175755	2.09718					0.710999	7.51289e-05	105.667	720.968	58				0.710525	9.55487e-05
07	Ipira01-Seq9-50um		2022-08-30		0.000415999	0.000144406	1.89304e-06	0.000129124	0.00201445	0.00015503	4.63121e-06	0.000114032	-0.000102967	0.000160583	0.000669059	0.000113667	1.58889e-06	0.000108727	4.50074e-05	0.000114531	0.000345659	0.000110521		2.6055			0.000439874	0.00021974	0.015684	0.000152298	5.96524e-05	0.250257	5.86441e-05	0.180293	2.15127					0.710984	8.25557e-05	116.115	698.865	57				0.710564	0.000110644
08	Ipira02-Seq9-50um		2022-08-30		0.000414336	0.00011211	-3.20577e-06	0.000109495	0.00200782	0.000144787	-5.96294e-06	0.000125308	-0.000119064	0.000127724	0.000663297	0.000121072	-2.14827e-07	0.000128848	4.22493e-05	0.000129794	0.000346878	0.000121664		2.56269			0.000403353	0.00021083	0.0154273	0.00014284	5.78591e-05	0.246222	6.00355e-05	0.177358	2.11592					0.710979	9.09665e-05	127.945	692.999	56				0.710539	0.000109487
09	Ipira03-Seq9-50um		2022-08-30		0.000417556	0.000138608	3.48435e-06	0.00011925	0.00201015	0.000148268	1.15107e-05	0.000103861	-0.000101096	0.000109806	0.000672444	0.000107965	5.2798e-06	0.000120418	3.95355e-05	0.000129061	0.000332685	0.000119991		2.56225			0.00040797	0.000208125	0.0153981	0.000127298	5.77796e-05	0.246195	5.61334e-05	0.177348	2.11557					0.711062	9.38227e-05	131.947	808.914	57				0.710643	0.000112058
10	Ipira01-Seq1-50um		2022-09-01		0.000434239	0.000132771	5.86167e-06	0.000116262	0.00208302	0.000147707	-1.82437e-05	8.97701e-05	-9.23941e-05	0.00012569	0.000724349	0.000126624	1.31822e-05	0.000131341	7.0525e-05	9.5832e-05	0.000618845	0.000119456		2.36641			0.000480252	0.000248945	0.0142306	0.00017508	6.57266e-05	0.227146	6.70084e-05	0.163659	1.95356					0.71093	8.12287e-05	114.257	623.357	58				0.710406	0.000105835
11	Ipira02-Seq1-50um		2022-09-01		0.000433601	9.52344e-05	1.23941e-05	0.000121004	0.00208782	0.00013272	-1.31432e-05	0.000111883	-0.000100656	0.000115943	0.000724618	0.000116731	5.02289e-06	0.000128854	5.45764e-05	0.000127518	0.000533463	0.000151235		2.35477			0.000455217	0.000245147	0.0141523	0.000163532	7.09201e-05	0.226026	5.40156e-05	0.162859	1.94404					0.710941	8.18065e-05	115.068	638.423	58				0.710508	0.000122617
12	Ipira03-Seq1-50um		2022-09-01		0.00043382	0.000127891	1.2147e-05	0.000106867	0.00208248	0.000101811	-1.08472e-05	0.000106739	-0.000107868	0.000128217	0.000720555	0.000145459	-5.05848e-06	0.000137627	5.79383e-05	0.000118892	0.00047513	0.000131044		2.31383			0.000468134	0.00025419	0.0139308	0.000171908	6.93406e-05	0.222116	6.18149e-05	0.160047	1.91028					0.710967	8.67191e-05	121.973	675.841	59				0.710478	0.000116546
13	Ipira01-Seq2-50um		2022-09-01		0.00043862	9.93494e-05	6.10566e-06	0.000122064	0.002077	0.000144795	-1.39732e-05	0.00010454	-9.86445e-05	0.000113231	0.000713219	0.000100082	-4.55891e-06	0.000122616	5.6257e-05	0.000102052	0.000464939	0.000113648		2.263			0.000463506	0.000242954	0.013639	0.00017595	7.30891e-05	0.217226	6.53487e-05	0.156538	1.86832					0.711057	6.91781e-05	97.289	802.689	58				0.710474	8.51785e-05
14	Ipira02-Seq2-50um		2022-09-01		0.000427885	0.000111852	9.81563e-06	0.000159237	0.00208779	0.000153266	-4.5176e-06	0.000114855	-0.000104293	0.0001186	0.000708072	0.000107423	-4.15721e-07	0.000122267	4.43925e-05	0.000113725	0.000422436	0.000106953		2.26051			0.000417086	0.00020096	0.0135436	0.000135829	5.54088e-05	0.217069	6.35725e-05	0.15641	1.86631					0.711112	9.73449e-05	136.891	879.54	57				0.710561	0.000103813
15	Ipira03-Seq2-50um		2022-09-01		0.000431707	0.00010003	8.54772e-06	0.00011125	0.00208877	0.000147707	-8.28995e-06	0.00011798	-0.000108597	0.000123432	0.000701466	0.000139886	5.60823e-06	0.000113221	4.58543e-05	9.52519e-05	0.000383341	0.000141713		2.3729			0.000476574	0.000238085	0.0142824	0.000162812	7.2992e-05	0.227768	5.81376e-05	0.164131	1.95915					0.710993	7.58338e-05	106.659	711.727	58				0.710532	9.97386e-05
16	Ipira01-Seq1-50um		2022-09-05		0.000412276	0.00012994	1.99259e-05	0.000133363	0.00199503	0.000130511	2.283e-06	0.000109718	-8.78202e-05	0.00013499	0.000634267	0.000107486	8.81277e-06	0.00011686	1.54635e-05	0.000109693	0.000164759	0.000103934		2.24308			0.000443091	0.000222471	0.0135106	0.000161453	5.99326e-05	0.215291	4.59972e-05	0.155169	1.85217					0.711079	8.59016e-05	120.805	833.833	57				0.710658	0.000125985
17	Ipira02-Seq1-50um		2022-09-05		0.000410006	0.000123839	1.19894e-05	0.000118762	0.0019887	0.000129484	2.97767e-06	0.000121256	-8.63353e-05	0.000123227	0.000647569	0.000116296	2.58579e-06	0.000124471	1.9722e-05	0.000111362	0.000236265	0.000124609		2.28544			0.000482426	0.000256358	0.0137792	0.000169595	8.57034e-05	0.219372	6.7643e-05	0.15812	1.88708					0.711187	9.93976e-05	139.763	985.592	56				0.710593	0.000120648
18	Ipira03-Seq1-50um		2022-09-05		0.00041126	0.000132475	2.04196e-05	0.000127596	0.00198606	0.000126426	-3.0807e-06	0.000103864	-8.15148e-05	0.000128966	0.000644213	0.000101824	2.43421e-07	0.000108575	2.75034e-05	0.000121303	0.000258796	0.000119358		2.28599			0.000481475	0.000256403	0.0138029	0.000178934	6.65389e-05	0.2194	6.57271e-05	0.158118	1.88751					0.71104	7.60439e-05	106.947	777.801	56				0.710492	0.000130429
19	Ipira01-Seq2-50um		2022-09-05		0.000409612	0.000114091	1.1478e-05	0.000136556	0.00198242	0.000126946	-4.87127e-06	0.000103822	-8.04395e-05	0.000132084	0.000637311	0.000110462	-2.5629e-06	0.000119059	2.87047e-05	0.000108569	0.000227856	0.000119101		2.38598			0.00051696	0.000284255	0.0144118	0.000182563	8.00847e-05	0.22896	6.61992e-05	0.165009	1.97012					0.710957	6.78291e-05	95.4053	661.524	56				0.710396	0.000103332
20	Ipira02-Seq2-50um		2022-09-05		0.000410646	0.000111479	1.32864e-05	0.000121573	0.00197929	0.000162001	-5.21471e-06	0.000110687	-8.54595e-05	0.000123454	0.000643286	9.89401e-05	6.80912e-06	0.000145463	3.58184e-05	0.000127958	0.000238112	0.000136275		2.29554			0.000475894	0.000247952	0.0138521	0.000165453	7.19506e-05	0.220297	6.06306e-05	0.158775	1.89542					0.711067	9.91405e-05	139.425	816.351	57				0.710556	0.000109839
21	Ipira03-Seq2-50um		2022-09-05		0.000405329	0.000116716	1.29592e-05	0.000127209	0.00197978	0.000134578	-4.79793e-06	0.000118003	-8.40189e-05	0.000121709	0.000643175	0.000117915	4.71188e-06	0.000108669	3.1099e-05	0.000114585	0.000235024	0.000132149		2.28039			0.000460238	0.000249885	0.0137442	0.000156969	7.03902e-05	0.218831	5.88717e-05	0.157703	1.88291					0.71091	7.57388e-05	106.538	595.912	57				0.710465	9.56746e-05
																																						Average	0.711012							Average	0.710542
																																						2 s.d.	0.000138592							2 s.d.	0.000146877
																																						2 s.d. ppm	194.922							2 s.d. ppm	206.711
01	Ipira01-Seq4-25um		2022-08-30		0.000436142	0.000117184	4.82479e-06	0.000115002	0.00210938	0.000140947	6.74316e-05	0.000143806	-0.000103395	0.000142396	0.000677262	0.000100814	9.87849e-06	0.000118514	2.2788e-05	0.000116724	0.000166829	0.000125781		0.663022			0.000136013	6.93997e-05	0.00401753	3.54692e-05	2.79735e-05	0.0636513	1.16025e-05	0.0458512	0.547362					0.710838	0.000195828	275.49	493.51	57				0.710418	0.000291187
02	Ipira02-Seq4-25um		2022-08-30		0.000427675	0.000123412	1.17769e-05	0.000135369	0.00208997	0.000123256	6.41942e-05	0.000124569	-9.82788e-05	0.000156147	0.000679788	0.000122513	-4.4944e-06	0.000106863	2.14146e-05	0.000101645	0.000159109	0.000121732		0.672413			0.000134873	5.3555e-05	0.00406195	4.25673e-05	2.9613e-05	0.0645636	2.00967e-05	0.0465109	0.555125					0.710972	0.000186727	262.636	682.581	57				0.710361	0.000306348
03	Ipira03-Seq4-25um		2022-08-30		0.000431492	0.00013079	2.8255e-07	0.000120789	0.00210441	0.000150463	5.25114e-05	0.000111308	-8.88835e-05	0.000110927	0.000684141	0.000115877	3.58857e-06	0.000146478	2.35279e-05	0.000123427	0.00016479	0.000127325		0.676974			0.000135211	6.0238e-05	0.00407779	2.40676e-05	-3.10907e-06	0.0649937	2.40389e-05	0.0468245	0.558878					0.710843	0.000167247	235.279	500.646	58				0.710074	0.000277095
04	Ipira01-Seq5-25um		2022-08-30		0.000430423	0.000141869	5.54498e-06	0.000138205	0.00208373	0.000115646	1.00659e-05	0.00011478	-9.64635e-05	0.000127661	0.000681606	9.4515e-05	1.03295e-06	0.000113479	2.57534e-05	0.000117899	0.000169702	0.000124552		0.67329			0.000135967	6.24568e-05	0.00407213	4.52698e-05	9.9525e-06	0.0646371	2.27534e-05	0.0465593	0.555831					0.710816	0.000217927	306.587	462.827	56				0.710188	0.000406364
05	Ipira02-Seq5-25um		2022-08-30		0.000430423	0.000141869	5.54498e-06	0.000138205	0.00208373	0.000115646	1.00659e-05	0.00011478	-9.64635e-05	0.000127661	0.000681606	9.4515e-05	1.03295e-06	0.000113479	2.57534e-05	0.000117899	0.000169702	0.000124552		0.676012			0.000139675	7.31382e-05	0.0040916	4.76682e-05	2.16907e-05	0.064896	2.12033e-05	0.0467526	0.558079					0.710906	0.000212244	298.554	590.396	58				0.710291	0.000340966
06	Ipira03-Seq5-25um		2022-08-30		0.000425146	0.000135137	7.01121e-06	0.000118218	0.00208036	0.000151986	1.24679e-05	0.000106253	-9.72575e-05	0.00011518	0.000680152	0.000112095	1.49727e-06	0.000114483	2.05121e-05	0.000107541	0.000154774	0.000147526		0.671355			0.000147744	6.75413e-05	0.00406159	4.31175e-05	1.17317e-05	0.0644674	2.07682e-05	0.0464449	0.554247					0.71099	0.000210328	295.824	708.306	60				0.710297	0.000308886
07	Ipira01-Seq6-25um		2022-08-30		0.000429246	9.23033e-05	9.03415e-06	0.000129836	0.00207446	0.000134544	1.11203e-05	0.000115852	-9.8451e-05	0.000130785	0.000668769	0.000104344	5.98071e-06	0.000120821	1.96154e-05	0.000108134	0.000168198	8.68514e-05		0.670226			0.000136349	5.92973e-05	0.00404478	5.00893e-05	2.21823e-05	0.0643513	1.43735e-05	0.0463613	0.553304					0.710931	0.000194227	273.201	624.826	57				0.710512	0.000362347
08	Ipira02-Seq6-25um		2022-08-30		0.000426627	0.00014279	1.44301e-05	0.000120024	0.00208642	0.000130022	1.16636e-05	0.00011797	-8.93898e-05	0.000122387	0.000660039	0.000121745	7.54507e-06	0.000114212	1.72154e-05	0.000116753	0.000163697	0.00011071		0.670609			0.000136169	6.81585e-05	0.00404527	3.30622e-05	6.93488e-06	0.0644012	6.98889e-06	0.0463916	0.553632					0.711006	0.000195866	275.477	730.451	57				0.710828	0.000327352
09	Ipira03-Seq6-25um		2022-08-30		0.000429108	0.000123342	7.95121e-06	0.000117896	0.00210636	0.000118119	1.16557e-05	8.62626e-05	-9.85695e-05	0.000129693	0.000665307	0.000100918	2.62396e-06	0.000109221	1.87453e-05	0.000111209	0.000160149	0.000125758		0.664926			0.000139982	7.1498e-05	0.0040638	4.02412e-05	7.36278e-06	0.06387	1.24049e-05	0.0460056	0.548933					0.711031	0.00023141	325.457	765.154	59				0.710525	0.000308325
10	Ipira01-Seq3-25um		2022-09-02		0.000434352	0.000124446	1.53959e-05	0.000124026	0.00210809	0.000134824	-1.1515e-05	0.000122771	-9.04265e-05	0.000127523	0.0006637	0.000113003	6.03762e-06	0.000130826	1.10388e-05	0.000123285	0.000106516	0.000131599		0.637625			0.00016863	9.49967e-05	0.00388122	7.13399e-05	4.02067e-05	0.061187	2.60232e-05	0.0441092	0.526446					0.711167	0.000273567	384.674	956.693	60				0.71021	0.000349441
11	Ipira02-Seq3-25um		2022-09-02		0.000431263	0.000130382	1.70458e-05	0.000118581	0.00209452	0.000137659	-1.13585e-05	0.000110496	-9.0938e-05	0.000123028	0.000662373	0.000106513	5.3603e-06	0.000124847	1.20863e-05	0.000113572	0.000107966	0.000117569		0.643207			0.000173929	8.68782e-05	0.00389727	7.33773e-05	2.61196e-05	0.0617267	2.31978e-05	0.0444929	0.531052					0.711189	0.000182826	257.071	987.754	56				0.710295	0.000333681
12	Ipira03-Seq3-25um		2022-09-02		0.000435023	0.000135424	1.31036e-05	0.000138875	0.00208765	0.00013533	-1.41928e-05	0.000110614	-8.80885e-05	0.000113836	0.000662042	0.000121064	2.82964e-06	0.000111513	1.34545e-05	0.000110981	0.000105404	0.000115527		0.637625			0.000173432	9.7746e-05	0.00387469	6.23481e-05	2.35802e-05	0.0611869	2.42475e-05	0.0440994	0.526445					0.711021	0.000189352	266.31	751.379	58				0.710247	0.000358047
13	Ipira01-Seq8-25um		2022-09-02		0.000428227	0.00012858	1.41951e-05	0.000121894	0.00209205	0.00013201	-1.18894e-05	0.000122736	-9.29178e-05	0.000120544	0.000663107	0.000107091	9.55278e-06	0.000121649	1.42496e-05	0.000112039	9.7655e-05	0.000119961		0.622877			0.000151801	8.33534e-05	0.00376901	6.55246e-05	2.01975e-05	0.0597679	9.32901e-06	0.0430756	0.514277					0.710906	0.000231095	325.071	589.075	58				0.710541	0.000325602
14	Ipira02-Seq8-25um		2022-09-02		0.000433142	0.00011502	1.21236e-05	0.000114558	0.00209077	0.000151552	5.43819e-06	0.000114359	-9.67547e-05	0.000125755	0.000662481	0.000105546	2.74497e-06	0.000119608	1.19799e-05	0.000125174	9.65251e-05	0.000118532		0.619265			0.000143683	8.21556e-05	0.00375748	5.0212e-05	2.33341e-05	0.0594325	1.55484e-05	0.0428328	0.511293					0.711151	0.000209703	294.879	934.445	57				0.710559	0.000329841
15	Ipira03-Seq8-25um		2022-09-02		0.000434281	0.00013129	1.67909e-05	0.000112418	0.00208815	0.00013792	9.33779e-06	0.000128189	-9.27549e-05	0.000120679	0.000665004	0.000115631	-1.45443e-06	0.000119302	1.10053e-05	0.000126683	9.95214e-05	0.000136133		0.629044			0.000147432	8.14801e-05	0.00380594	9.58098e-05	3.03478e-05	0.060362	2.96849e-05	0.0434976	0.519367					0.710876	0.00022515	316.723	546.922	59				0.709763	0.000268359
16	Ipira01-Seq1-25um		2022-09-06		0.000408087	0.000112724	1.0783e-05	0.000111919	0.00199258	0.000132419	8.64207e-06	0.000127933	-0.000100626	0.000110779	0.000630602	0.000112392	9.13923e-06	0.000119504	1.55644e-05	0.000122702	7.60558e-05	0.000126741		0.617263			0.000129055	7.32522e-05	0.00373044	4.81821e-05	3.33095e-05	0.0592481	7.56583e-06	0.0426833	0.509659					0.710777	0.000201155	283.007	407.964	58				0.710472	0.000300024
17	Ipira02-Seq1-25um		2022-09-06		0.000410764	0.000114973	1.05164e-05	0.000119823	0.0019885	0.000158293	6.54221e-06	0.000113745	-9.3541e-05	0.00012931	0.00062767	0.000116041	2.79876e-06	0.000115284	1.25201e-05	0.000113985	8.64411e-05	0.000139116		0.612132			0.000124008	7.26671e-05	0.00369907	4.63707e-05	2.08674e-05	0.0587556	1.59299e-05	0.0423387	0.505411					0.71092	0.000246544	346.796	609.162	59				0.710433	0.000364843
18	Ipira03-Seq1-25um		2022-09-06		0.000408068	0.000108935	1.12532e-05	0.000122975	0.00198901	0.000132654	4.96828e-06	0.00010685	-9.29221e-05	0.00011664	0.000624739	0.000114474	-1.04665e-06	0.00011701	6.36385e-06	0.000122598	8.92447e-05	0.000109339		0.624081			0.000140105	8.04451e-05	0.00377688	4.33429e-05	1.80328e-05	0.0599096	2.53778e-05	0.0431786	0.515275					0.711191	0.000197794	278.117	990.554	57				0.710471	0.00035835
19	Ipira01-Seq2-25um		2022-09-06		0.000407904	0.000122141	1.2438e-05	0.000118607	0.00198804	0.000139519	6.48149e-06	0.000135453	-8.85401e-05	0.000118768	0.000624674	0.000114701	1.86843e-06	0.000131534	6.58579e-06	0.000122222	8.69077e-05	0.000115843		0.619741			0.000130322	7.15482e-05	0.00374707	4.45855e-05	1.11343e-05	0.0595053	1.69641e-05	0.0428758	0.511699					0.7111	0.000177673	249.856	862.94	58				0.710515	0.000366926
20	Ipira02-Seq2-25um		2022-09-06		0.000407235	0.000117256	1.13592e-05	0.000118658	0.001986	0.000146036	2.55193e-06	0.000114209	-9.55692e-05	0.000119128	0.00062252	0.00012375	7.3037e-06	0.000116695	9.43956e-06	0.000122086	9.08987e-05	0.000130164		0.626657			0.000132444	6.4026e-05	0.00378234	5.19206e-05	9.86764e-06	0.0601523	1.27812e-05	0.0433497	0.517404					0.711014	0.000177951	250.279	741.299	57				0.710514	0.000309185
21	Ipira03-Seq2-25um		2022-09-06		0.000407992	0.000115406	1.43369e-05	0.000123789	0.00198382	0.000134498	7.40174e-06	0.000118869	-0.000109036	0.000144121	0.000627901	0.000125035	9.28124e-06	0.000124637	1.5161e-05	0.000124311	9.39806e-05	0.000111226		0.656822			0.000146276	6.96733e-05	0.00397824	4.9036e-05	3.00809e-05	0.0630684	1.50363e-05	0.0454287	0.542309					0.71079	0.00020344	286.217	426.633	59				0.710264	0.000298484
																																						Average	0.710973							Average	0.71037
																																						2 s.d.	0.000261904							2 s.d.	0.000434932
																																						2 s.d. ppm	368.374							2 s.d. ppm	612.26
01	Ipira01-Seq1-13um		2022-08-30		0.000448277	0.000125581	1.48841e-05	0.000134406	0.00216134	0.000149718	-3.7737e-06	0.000108781	-0.000108654	0.000125578	0.000690331	0.000127192	3.98377e-06	0.00010349	1.81602e-05	9.80697e-05	0.000119367	0.000116386		0.162008			2.92158e-05	1.14386e-05	0.000973272	2.18963e-05	1.4986e-05	0.0155338	-1.36555e-06	0.0111897	0.133664					0.710804	0.000769722	1082.89	445.861	56				0.710027	0.00137223
02	Ipira02-Seq1-13um		2022-08-30		0.000447907	0.000128619	1.29086e-05	0.000113633	0.00215427	0.000115068	6.31938e-06	0.000130384	-9.67615e-05	0.000107583	0.00068434	0.000108508	1.80738e-06	0.000119555	9.75271e-06	0.000110721	0.000113191	0.000150252		0.16039			3.05921e-05	9.11074e-06	0.00097161	1.98714e-05	-4.26755e-06	0.0153897	4.77138e-06	0.0110916	0.132337					0.71115	0.000684357	962.325	932.761	56				0.709926	0.00123313
03	Ipira03-Seq1-13um		2022-08-30		0.000442276	0.000111551	1.01571e-05	0.000115687	0.00214834	0.000151125	8.7389e-06	0.000126434	-9.91723e-05	0.000138609	0.000683254	0.000101354	2.18604e-06	0.000128969	9.33261e-06	0.000121145	0.00011601	0.000110539		0.163108			3.7154e-05	1.63336e-05	0.000986221	1.41983e-05	1.64914e-05	0.0156526	5.97733e-06	0.0112729	0.134579					0.711072	0.000682532	959.864	822.955	56				0.710115	0.00115274
04	Ipira01-Seq2-13um		2022-08-30		0.000440439	0.000114719	5.77831e-06	0.000111967	0.00215588	0.000132734	1.07122e-05	9.56307e-05	-8.91751e-05	0.000126927	0.000691453	9.62238e-05	4.48374e-06	0.000118694	1.08065e-05	0.000132571	0.000113948	0.000128683		0.158099			5.26379e-05	2.26834e-05	0.000942374	1.36393e-05	2.90024e-06	0.0151555	-8.35964e-06	0.0109181	0.130449					0.710823	0.000859362	1208.97	472.829	57				0.71137	0.00128836
05	Ipira02-Seq2-13um		2022-08-30		0.000440138	0.0001087	8.82428e-06	0.000104971	0.00214167	0.000143013	9.69153e-06	9.46088e-05	-9.72973e-05	0.000134498	0.000677974	0.000103551	1.15388e-06	0.000124859	1.16352e-05	0.000131279	0.000108382	0.000131027		0.159392			4.1234e-05	1.67186e-05	0.00097591	1.3948e-05	1.06358e-06	0.0153015	7.29776e-06	0.011023	0.131518					0.71082	0.000609268	857.134	468.289	57				0.709766	0.00160881
06	Ipira03-Seq2-13um		2022-08-30		0.000439792	0.00010675	9.13103e-06	0.000133153	0.00213282	0.000125001	-1.16422e-06	0.000110039	-9.31327e-05	0.000120939	0.000682235	0.000118098	-8.48228e-07	0.000123975	1.64617e-05	0.0001149	0.000110717	0.000104518		0.16526			3.83388e-05	2.75664e-05	0.00101385	2.39077e-05	2.51382e-06	0.0158548	1.72793e-05	0.0114228	0.136363					0.710693	0.000652534	918.167	289.347	55				0.708612	0.0010134
07	Ipira01-Seq3-13um		2022-08-30		0.000437379	0.000107014	8.48808e-06	0.00011785	0.00213742	0.00014689	-1.03532e-05	0.000123346	-0.000106104	0.000140133	0.00067678	7.68383e-05	2.51826e-06	0.000106831	7.17434e-06	0.000107697	9.34957e-05	0.000122378		0.166891			3.43311e-05	1.04186e-05	0.00102387	3.33823e-05	2.29603e-06	0.0160191	2.98233e-06	0.0115437	0.137725					0.711233	0.000651845	916.5	1049.53	56				0.710562	0.00118693
08	Ipira02-Seq3-13um		2022-08-30		0.000442687	0.000120119	9.80623e-06	0.000144861	0.00212808	0.000116022	-4.23363e-06	0.000115427	-0.000117123	0.000145186	0.000677674	0.000118137	9.74615e-06	0.000119919	1.63929e-05	0.000108699	9.96667e-05	0.00010404		0.160831			2.28166e-05	2.21088e-05	0.000984664	1.50405e-05	2.1759e-05	0.0154414	6.41898e-07	0.0111086	0.132717					0.709867	0.000782899	1102.88	-872.226	59				0.709622	0.00139398
09	Ipira03-Seq3-13um		2022-08-30		0.000437379	0.000107014	8.48808e-06	0.00011785	0.00213742	0.00014689	-1.03532e-05	0.000123346	-0.000106104	0.000140133	0.00067678	7.68383e-05	2.51826e-06	0.000106831	7.17434e-06	0.000107697	9.34957e-05	0.000122378		0.162467			2.81427e-05	1.31653e-05	0.000993373	3.07458e-05	5.1614e-06	0.0155946	2.60374e-06	0.0112343	0.134072					0.711001	0.000698695	982.691	723.664	56				0.709996	0.00153847
10	Ipira01-Seq1-13um		2022-09-02		0.000438758	9.99304e-05	1.61981e-05	0.0001309	0.00217307	0.000142818	-1.38414e-05	0.000100905	-9.84037e-05	0.000127423	0.000682391	0.000125338	1.33241e-07	0.0001349	2.26873e-05	0.000114032	0.000167807	0.000123768		0.165891			3.5223e-05	1.12312e-05	0.000996709	2.51402e-05	6.45665e-06	0.0158989	4.73673e-06	0.011452	0.136829					0.710486	0.00079265	1115.64	-1.71763	58				0.709649	0.00130975
11	Ipira02-Seq1-13um		2022-09-02		0.000429281	0.000144902	1.43833e-05	0.000110047	0.00215813	0.000145833	2.71502e-06	0.000118015	-0.000104956	0.000119621	0.000699199	0.000123171	-4.94484e-06	0.000106795	2.54013e-05	0.00012865	0.000139123	0.000138708		0.163111			3.73154e-05	1.15612e-05	0.000989255	1.41318e-05	9.55551e-06	0.0156118	1.10374e-05	0.011265	0.134561					0.711074	0.000716944	1008.25	826.803	56				0.709383	0.00115687
12	Ipira03-Seq1-13um		2022-09-02		0.000443558	0.000124163	1.19765e-05	8.58989e-05	0.0021592	0.000129673	1.1538e-05	0.000110571	-9.63213e-05	0.00012586	0.00069364	0.000101193	6.55917e-06	0.000107683	1.65021e-05	0.000106504	0.00012309	0.000101297		0.155654			3.15035e-05	2.62415e-05	0.000934363	8.55297e-06	2.50221e-06	0.0149149	-7.07463e-06	0.0107621	0.128417					0.711461	0.000765572	1076.06	1370.57	57				0.712698	0.00126695
13	Ipira01-Seq2-13um		2022-09-02		0.000435367	0.000115851	9.79648e-06	0.000120361	0.00217477	0.000213402	1.38124e-05	0.000133615	-0.000100394	0.000126592	0.000826355	0.00270968	7.22194e-06	0.000132693	0.000127495	0.00199098	0.00141576	0.0233784		0.161616			3.3473e-05	2.41384e-05	0.000973844	7.99744e-06	7.11025e-06	0.0155035	4.91216e-07	0.0111751	0.133347					0.711192	0.000785702	1104.77	992.17	57				0.71039	0.00147049
14	Ipira02-Seq2-13um		2022-09-02		0.000435476	0.000118648	1.44338e-05	0.000105698	0.00214302	0.000160406	5.39385e-06	0.000131483	-9.70114e-05	0.00013576	0.000685631	0.000136011	-4.4213e-06	0.000115253	2.65704e-05	0.000134764	0.000100567	0.000115918		0.159987			4.18042e-05	1.55527e-05	0.000982703	3.57549e-06	7.82961e-06	0.0153316	1.10119e-05	0.011055	0.132015					0.711695	0.000739516	1039.09	1699.77	56				0.709771	0.00113966
15	Ipira03-Seq2-13um		2022-09-02		0.000435015	0.000117862	5.06955e-06	0.000101189	0.00215165	0.000181446	-1.53063e-05	0.000103015	-0.000100768	0.000129356	0.00068664	0.000121499	4.91197e-06	0.000111452	7.26324e-06	0.000135044	9.61167e-05	0.000128418		0.15652			4.62871e-05	2.83483e-05	0.000961185	1.98026e-05	9.35428e-06	0.0149964	1.70039e-06	0.0108266	0.129161					0.711953	0.000638677	897.077	2063.54	56				0.711206	0.00109096
16	Ipira01-Seq3-13um		2022-09-02		0.000441316	0.000112551	1.34433e-05	0.000107953	0.00215857	0.000164242	-1.59513e-05	0.000118928	-9.80279e-05	9.97632e-05	0.000681751	9.80338e-05	-4.88552e-06	0.0001214	1.84286e-05	0.000104725	9.21834e-05	0.000108262		0.161268			4.06599e-05	2.92919e-05	0.000978203	2.4763e-05	-6.49988e-07	0.0154472	7.52324e-06	0.0111377	0.133085					0.710537	0.000670281	943.345	70.2652	54				0.709753	0.00113605
17	Ipira03-Seq3-13um		2022-09-02		0.000437216	0.000114762	6.26312e-06	0.000154501	0.00215722	0.000125527	-8.19896e-06	0.000129451	-9.25175e-05	0.000146929	0.000679651	0.000109272	4.22275e-06	9.66306e-05	1.63749e-05	0.000110385	8.60271e-05	0.000128705		0.159637			4.01747e-05	3.24643e-05	0.00097237	2.77966e-05	-8.36792e-06	0.0153059	-3.98274e-06	0.0110218	0.131739					0.710166	0.000659427	928.553	-451.89	56				0.710206	0.00139714
18	Ipira03-Seq3-13um		2022-09-02		0.000437789	0.000132804	1.94996e-05	9.75501e-05	0.00215139	0.000125417	-7.52802e-06	0.000100034	-0.000103084	0.000147559	0.000685841	0.00012892	7.4464e-06	0.000109981	5.39844e-06	0.000104598	8.10512e-05	0.000120536		0.157674			4.00302e-05	8.61216e-06	0.00094763	1.41907e-05	1.2706e-05	0.0151044	-2.71418e-06	0.0109031	0.130124					0.711652	0.000548109	770.192	1640.06	56				0.71175	0.00114671
19	Ipira01-Seq4-13um		2022-09-02		0.000436563	0.000127754	7.32423e-06	0.000128528	0.00215253	0.00013676	1.09951e-05	0.000124471	-9.7894e-05	0.000114693	0.000683315	0.00011152	4.81419e-06	0.000112324	4.80738e-06	0.000120684	7.4231e-05	0.000115222		0.158153			4.00709e-05	2.42315e-05	0.000951451	2.51763e-05	-5.49263e-06	0.0151568	2.83703e-06	0.0109329	0.130531					0.711222	0.000599729	843.238	1034.1	57				0.710975	0.00145284
20	Ipira02-Seq4-13um		2022-09-02		0.000437204	0.000123997	8.83319e-06	0.000115432	0.00214886	0.000140813	1.85767e-05	0.000116174	-0.000114852	0.000127937	0.000682114	0.000117985	6.26534e-06	0.000119954	7.38817e-06	0.00013486	7.17255e-05	0.000116456		0.160469			4.06276e-05	1.69814e-05	0.000974935	4.7085e-05	1.46025e-05	0.0153812	6.77434e-06	0.0110951	0.132443					0.711139	0.000663159	932.531	917.708	58				0.709615	0.00125631
21	Ipira03-Seq4-13um		2022-09-02		0.000440373	0.000126516	4.16209e-06	0.000121755	0.00215364	0.000140657	2.07355e-05	0.000102066	-0.000102044	0.000127856	0.000678589	0.000126874	6.20021e-06	0.000114626	3.93945e-06	0.000131709	6.81472e-05	0.000127067		0.154479			3.2032e-05	2.37616e-05	0.000931578	2.12257e-05	9.37136e-06	0.0148153	1.04432e-06	0.010682	0.127499					0.710853	0.000665752	936.553	515.719	54				0.711038	0.00139822
22	Ipira01-Seq5-13um		2022-09-02		0.000439066	0.000125304	5.5069e-06	0.000140684	0.00214993	0.000140771	2.38353e-05	0.000110799	-0.000101853	0.000132176	0.000677595	0.000117388	7.88104e-06	0.000121059	4.00548e-06	0.000127729	7.00132e-05	0.00011869		0.154203			3.98554e-05	2.12804e-05	0.000934443	3.44191e-06	-6.47948e-06	0.0147903	-6.40943e-06	0.0106581	0.12727					0.710599	0.000762305	1072.77	157.041	56				0.711009	0.00157033
23	Ipira02-Seq5-13um		2022-09-02		0.000434971	0.000113603	1.05506e-05	0.000122038	0.00214475	0.000161255	1.75376e-05	0.000120798	-0.000104859	0.000124108	0.00068094	0.000108204	6.91009e-06	0.000123342	-1.12308e-06	0.000129744	6.76155e-05	0.000125356		0.153266			4.27335e-05	1.56637e-05	0.000928942	7.0724e-06	1.12228e-05	0.0146942	-1.8719e-06	0.0105888	0.126501					0.710618	0.000601259	846.108	183.813	55				0.711141	0.00128811
24	Ipira03-Seq5-13um		2022-09-02		0.000438646	0.000128083	1.56028e-06	0.000121948	0.00214291	0.000135902	1.61774e-05	0.000113775	-0.000103865	0.000122255	0.000679842	0.000123803	4.22774e-06	0.000118848	-2.31487e-06	0.000119242	6.97831e-05	0.000116389		0.155012			4.4164e-05	2.89601e-05	0.000945179	8.35162e-06	9.84912e-06	0.0148642	4.77185e-06	0.0107171	0.127938					0.710896	0.000688959	969.141	576.128	58				0.710043	0.00118571
																																						Average	0.710958							Average	0.710359
																																						2 s.d.	0.000948589							2 s.d.	0.00178618
																																						2 s.d. ppm	1334.24							2 s.d. ppm	2514.47
01	Ipira01-Seq6-10um		2022-09-02		0.000439834	0.000119458	9.90812e-06	0.000121455	0.00214556	0.000127913	1.62469e-05	0.000123689	-0.000104861	0.000137385	0.000675022	0.000107243	2.57849e-06	0.000114737	6.30965e-06	0.000112201	6.49908e-05	0.000135935		0.0806443			2.60299e-05	8.8936e-06	0.00049118	8.64349e-06	6.40905e-06	0.00773128	-2.08832e-06	0.00556148	0.0665286					0.708881	0.001555	2193.6	-2260.98	57				0.70792	0.00259381
02	Ipira02-Seq6-10um		2022-09-02		0.000441656	0.000144579	7.6542e-06	0.000112203	0.00214325	0.000129551	1.27415e-05	0.000113625	-0.000104971	0.000119449	0.000679361	9.77267e-05	8.83027e-06	0.000114919	-4.74189e-07	0.000115529	5.93766e-05	0.000122873		0.0792604			2.22735e-05	8.17957e-06	0.000486692	7.04501e-06	-4.51355e-06	0.00760175	3.6929e-06	0.00547947	0.0653946					0.711133	0.00138092	1941.86	908.808	57				0.710441	0.00378425
03	Ipira03-Seq6-10um		2022-09-02		0.000441447	0.000126501	1.36641e-05	0.000116497	0.00214759	0.000125216	1.62383e-05	0.000115231	-0.000105819	0.00012388	0.000679329	0.000102672	4.96097e-06	0.000103863	-4.24923e-06	0.000124259	6.37971e-05	0.000124908		0.0811583			2.66439e-05	5.29044e-06	0.00048405	1.09041e-05	3.32059e-06	0.00777821	-3.47403e-06	0.00560489	0.0669585					0.710337	0.00158259	2227.94	-210.748	57				0.710138	0.0034413
04	Ipira01-Seq3-10um		2022-09-06		0.000407967	0.000131244	8.7257e-06	0.000120309	0.00198576	0.000128084	1.52734e-05	0.000121248	-9.31086e-05	0.000122526	0.000624122	0.000111906	3.68101e-06	0.000114875	1.05335e-05	0.000117304	7.00001e-05	0.000114452		0.0868589			2.09698e-05	1.48995e-05	0.000514692	3.80667e-06	1.64765e-06	0.0083287	1.82315e-05	0.00599498	0.0716573					0.710051	0.00144302	2032.28	-613.606	57				0.703577	0.00353336
05	Ipira02-Seq3-10um		2022-09-06		0.000407163	0.000127831	7.55968e-06	0.000122965	0.00197943	0.000152513	1.0977e-05	0.000106431	-0.000100359	0.000131571	0.000622788	0.000122741	2.96764e-06	0.000137973	6.30265e-06	0.000120188	7.2475e-05	0.000101417		0.0934619			2.02971e-05	8.23241e-06	0.000568621	4.85625e-06	4.8733e-06	0.00895206	4.7015e-06	0.00646005	0.077109					0.710973	0.00115132	1619.35	684.52	57				0.709852	0.00225782
06	Ipira03-Seq3-10um		2022-09-06		0.000402756	0.000118586	8.11001e-06	0.000124493	0.00197666	0.000147455	1.33488e-05	0.000108347	-0.000102324	0.000124793	0.000622609	0.00012373	2.14012e-06	0.000102131	8.57039e-06	0.000112761	6.21305e-05	0.000122504		0.0844255			1.95362e-05	1.28839e-05	0.00051686	-4.23851e-07	4.19091e-06	0.00809252	-3.19663e-06	0.00582704	0.069659					0.710585	0.00149854	2108.88	138.202	57				0.710996	0.00276859
07	Ipira01-Seq4-10um		2022-09-06		0.000408347	0.000111027	7.71794e-06	0.000119631	0.00197977	0.000142818	7.49784e-06	0.000113735	-0.00010084	0.000131868	0.000630991	0.000115592	6.45511e-06	0.000112478	1.14622e-05	0.000113894	0.000127144	0.000109451		0.0896604			1.94097e-05	1.24381e-05	0.000543538	8.94004e-06	7.06789e-06	0.00858798	2.65727e-06	0.00620772	0.0739143					0.713584	0.00119885	1680.04	4359.45	57				0.711229	0.00240137
08	Ipira02-Seq4-10um		2022-09-06		0.000406216	0.000109038	7.54544e-06	0.000121311	0.00197907	0.00012692	8.04242e-06	0.000117886	-0.000102936	0.000115885	0.000624586	0.000129904	2.0625e-06	0.000107331	1.38493e-05	0.000105328	0.00011335	0.000123566		0.0886583			2.14694e-05	1.09444e-05	0.00054323	1.06341e-05	7.45875e-06	0.0084944	3.62401e-06	0.00611912	0.0731009					0.711021	0.00144586	2033.5	751.021	56				0.710594	0.00261938
09	Ipira03-Seq4-10um		2022-09-06		0.000410666	0.000115532	9.19126e-06	0.000110459	0.00198182	0.00013991	1.59965e-05	0.000136194	-8.98263e-05	0.000131536	0.000630475	0.000106769	-1.22105e-06	0.000107953	1.47748e-05	0.00012364	0.000109288	0.000113735		0.0896914			1.84627e-05	1.36461e-05	0.000542754	6.22235e-06	8.18937e-06	0.00859567	-1.20476e-06	0.00620341	0.0739572					0.712188	0.00141755	1990.41	2394.33	58				0.711715	0.00211197
10	Ipira01-Seq1-10um		2022-09-07		0.000455895	0.000122799	1.16543e-05	0.000117239	0.0022072	0.000137433	7.41324e-06	0.0001041	-9.12006e-05	0.000135667	0.000700534	0.000135421	5.62734e-06	0.00011795	1.49295e-05	0.000105887	5.85598e-05	0.000106848		0.0737057			1.61186e-05	1.07491e-05	0.00045021	-2.91618e-06	9.77474e-06	0.00706409	6.10207e-07	0.00507601	0.0608065					0.707513	0.00159197	2250.09	-4185.18	55				0.706481	0.00252442
11	Ipira02-Seq1-10um		2022-09-07		0.000457369	0.000136359	6.80456e-06	0.000114836	0.00218961	0.000143989	9.66994e-06	0.000114099	-9.15158e-05	0.000122506	0.000694931	0.000105216	3.67654e-06	0.000122295	1.2206e-05	0.000112668	5.61298e-05	0.000115092		0.0733728			1.49136e-05	1.39899e-05	0.000412235	8.96715e-06	-9.24941e-06	0.00701258	-3.86137e-06	0.00505949	0.0605377					0.710801	0.00221424	3115.14	441.978	55				0.710472	0.00277699
12	Ipira03-Seq1-10um		2022-09-07		0.000429261	0.000129953	1.19242e-05	0.000129738	0.00207119	0.000132557	7.68534e-06	0.000113206	-9.80522e-05	0.000135954	0.0006504	0.000115025	3.95642e-06	0.000116232	1.37222e-05	0.000115003	6.68291e-05	0.0001158		0.0774174			1.18311e-05	1.52925e-05	0.000444883	9.89437e-06	7.08114e-06	0.00741608	-3.54983e-07	0.00533763	0.0638619					0.709725	0.00144212	2031.95	-1071.85	57				0.710043	0.002862
13	Ipira01-Seq2-10um		2022-09-07		0.000425036	0.000118651	8.62306e-06	0.000114378	0.00203196	0.000128423	4.02384e-06	9.89987e-05	-9.77413e-05	0.000129816	0.000645731	0.000113673	-2.53497e-06	0.000112438	9.84055e-06	0.000120121	6.37978e-05	0.000111253		0.0732841			1.90462e-05	1.76144e-05	0.000446993	4.88375e-06	-1.3845e-06	0.00701639	6.41598e-06	0.00506752	0.0604549					0.711875	0.00129631	1820.98	1953.78	55				0.708003	0.00259021
14	Ipira02-Seq2-10um		2022-09-07		0.000426199	0.000122314	1.11287e-05	0.000114108	0.00203731	0.000141508	6.65194e-07	0.000112912	-0.000104802	0.000121769	0.000647889	0.000111606	6.19518e-06	0.000119549	1.17356e-05	0.000121418	6.26553e-05	0.000113354		0.0739553			1.31885e-05	6.88095e-06	0.000436565	1.08869e-05	5.54251e-06	0.00708474	-2.01659e-06	0.00510256	0.0610096					0.710685	0.00203001	2856.41	278.278	57				0.711648	0.00344908
15	Ipira03-Seq2-10um		2022-09-07		0.000423611	0.000120837	1.12529e-05	0.00012862	0.00203023	0.000131743	4.32798e-06	0.000109504	-0.000103748	0.000123603	0.00063999	0.000114881	4.40482e-06	0.000105145	6.33865e-06	0.000121935	6.28296e-05	0.000115028		0.0747278			1.97269e-05	9.82504e-06	0.000453697	7.36947e-06	3.96085e-06	0.00716161	1.23358e-06	0.00517094	0.06165					0.712076	0.00176062	2472.51	2237.08	56				0.710699	0.00335554
16	Ipira01-Seq3-10um		2022-09-07		0.000417056	0.000115265	7.85958e-06	0.000115297	0.002036	0.000140454	6.45369e-06	0.000112996	-0.00010669	0.000118833	0.000642337	0.000117649	-3.86286e-06	0.000108199	7.2994e-06	0.000117822	6.40319e-05	0.000121253		0.0747018			1.99958e-05	3.16116e-06	0.000449524	1.2343e-05	5.78868e-06	0.00715158	5.01012e-06	0.00515507	0.0616246					0.710247	0.00176126	2479.78	-338.431	57				0.708463	0.00364434
17	Ipira02-Seq3-10um		2022-09-07		0.000420068	0.000140985	7.23594e-06	0.000118971	0.00203345	0.000126182	6.9221e-06	0.000116589	-9.68507e-05	0.000124619	0.000642311	0.00011628	5.94966e-06	0.000115387	9.4617e-06	0.000116516	6.46215e-05	0.000129455		0.0742651			2.87824e-05	1.20726e-05	0.000449372	1.31224e-05	3.77357e-06	0.00711126	3.02023e-06	0.00512322	0.0612626					0.709895	0.00146861	2068.78	-833.377	57				0.707855	0.00377886
18	Ipira03-Seq3-10um		2022-09-07		0.000420453	0.000124342	9.79929e-06	0.000132234	0.00203172	0.000149066	1.18527e-05	0.000118167	-9.70411e-05	0.000137187	0.000645934	0.000107031	2.48079e-06	0.000122493	6.90081e-06	0.000112619	5.88184e-05	0.000120961		0.0716549			2.69219e-05	5.02265e-06	0.000427253	9.97395e-06	1.09634e-06	0.0068637	9.03139e-06	0.00495409	0.059114					0.711725	0.00151761	2132.3	1742.65	57				0.707781	0.00264846
19	Ipira01-Seq4-10um		2022-09-07		0.00042117	0.00012737	1.27638e-05	0.000115881	0.00203821	0.000137764	2.38231e-06	0.000105714	-0.000103661	0.000114483	0.000648205	9.88763e-05	3.03865e-06	0.000115062	8.36974e-06	0.000119956	5.90143e-05	0.000127287		0.0744219			2.98292e-05	6.93877e-06	0.000452019	8.92659e-06	1.15822e-05	0.00712532	8.45141e-06	0.00513446	0.061399					0.71029	0.00117444	1653.47	-277.647	55				0.70726	0.0026944
20	Ipira02-Seq4-10um		2022-09-07		0.000421479	0.000115454	6.53681e-06	0.000112616	0.00203559	0.000126874	5.30194e-06	0.00011317	-9.87622e-05	0.000133298	0.000645145	0.000123989	2.35876e-06	0.000136583	8.40109e-06	0.000102159	6.64806e-05	0.00011981		0.0800339			1.84014e-05	1.83167e-05	0.000481921	1.31418e-05	-1.24558e-06	0.00767393	6.41652e-06	0.00553355	0.0660253					0.710989	0.00172975	2432.89	706.423	57				0.708269	0.00327536
21	Ipira03-Seq4-10um		2022-09-07		0.000425132	0.000119734	7.76064e-06	0.00013106	0.002033	0.000142099	8.74448e-06	0.000127638	-9.88067e-05	0.000125819	0.000644904	0.000106061	4.13595e-06	0.000125197	9.23589e-06	0.000123061	6.58257e-05	0.000127268		0.0723828			2.80988e-05	1.59173e-05	0.000434195	1.23221e-05	8.08725e-06	0.00693479	1.98581e-06	0.00499449	0.0597084					0.710204	0.00151095	2127.49	-398.263	56				0.708648	0.00326282
																																						Average	0.710704							Average	0.709147
																																						2 s.d.	0.00251263							2 s.d.	0.00400872
																																						2 s.d. ppm	3535.41							2 s.d. ppm	5652.88
01	MAD01-Seq7-50um		2022-08-30		0.000408855	0.000131723	5.46595e-06	0.000130893	0.0019876	0.000125666	9.09681e-06	0.000125789	-0.000102302	0.000120573	0.000717508	0.000103791	4.51026e-06	0.000111557	8.20541e-05	0.000116666	0.000732944	0.000111341		12.6053			0.000475344	0.000262128	0.0683243	0.000156263	6.99096e-05	1.21032	7.32993e-05	0.873236	10.4088					0.711903	8.39751e-05	117.959	144.994	58				0.711798	8.38797e-05
02	MAD02-Seq7-50um		2022-08-30		0.000403813	0.000152247	8.15198e-06	0.000123854	0.00200022	0.000145784	4.31313e-06	0.000133246	-0.000115833	0.000141858	0.000734924	8.6033e-05	-1.92506e-06	9.90893e-05	9.57575e-05	0.000137103	0.000922272	0.000140196		12.3227			0.000493462	0.000259972	0.0667892	0.00021975	7.04351e-05	1.18329	7.29153e-05	0.853749	10.1752					0.711951	7.28236e-05	102.287	212.064	58				0.711842	7.07701e-05
03	MAD03-Seq7-50um		2022-08-30		0.000407112	0.000113171	1.09035e-05	0.000116421	0.00199992	0.00011755	2.11469e-06	0.000112503	-0.000104015	0.000115919	0.000758225	9.67232e-05	9.58499e-06	0.000103857	9.56506e-05	0.000104563	0.00103351	0.000157482		12.4063			0.000491011	0.000266243	0.0672708	0.000178202	7.04713e-05	1.19131	6.42614e-05	0.859508	10.2441					0.71193	5.99464e-05	84.2027	182.968	58				0.711833	6.25194e-05
04	MAD01-Seq8-50um		2022-08-30		0.000411274	0.000118258	8.3094e-06	0.000105344	0.00199801	0.000152217	8.80043e-06	0.000131631	-0.000114803	0.000110117	0.000741354	0.000129624	6.21397e-07	0.00011571	9.06077e-05	0.000132184	0.000968222	0.000148481		13.1328			0.000520293	0.00028871	0.0712164	0.00019686	8.22929e-05	1.2609	7.70457e-05	0.909804	10.8441					0.71194	7.38243e-05	103.695	196.082	58				0.711824	7.66439e-05
05	MAD02-Seq8-50um		2022-08-30		0.000408456	0.000105207	1.15908e-05	0.000132946	0.00200356	0.000133389	7.22851e-06	8.80432e-05	-0.000113476	0.000114221	0.000764004	0.000125988	-9.32398e-06	0.000123949	0.000111657	0.000102132	0.00111962	0.00016064		12.3757			0.000483857	0.000266876	0.0671023	0.000166984	7.7905e-05	1.18855	8.62832e-05	0.85746	10.2188					0.711942	6.78575e-05	95.3132	199.492	57				0.711842	7.68427e-05
06	MAD03-Seq8-50um		2022-08-30		0.00041209	0.000142017	7.06315e-06	0.000116723	0.00200474	0.000141961	-2.94112e-06	0.000131282	-9.82e-05	0.000102804	0.000770534	0.000127255	7.56221e-06	0.000108513	0.000118399	8.92353e-05	0.00118539	0.000158986		13.191			0.000549857	0.000300821	0.0715489	0.000209075	8.4393e-05	1.26666	7.279e-05	0.913888	10.8919					0.711982	6.26293e-05	87.9648	255.069	58				0.711867	6.06628e-05
07	MAD01-Seq9-50um		2022-08-30		0.00040157	0.000103316	1.0371e-05	0.000114081	0.00199619	0.00015427	9.91539e-07	0.000108543	-0.0001049	0.000132729	0.000742224	9.76141e-05	9.40769e-06	0.000115501	9.29187e-05	9.53869e-05	0.000944221	0.000146256		12.7253			0.00052124	0.000290592	0.0690044	0.000190042	9.17923e-05	1.22189	7.74441e-05	0.881652	10.5076					0.711948	6.95373e-05	97.6719	207.527	57				0.711817	6.38415e-05
08	MAD02-Seq9-50um		2022-08-30		0.000409608	0.000116861	5.72268e-07	0.000101454	0.00198345	0.000136215	-2.55201e-06	0.000126273	-0.000102675	0.000142643	0.000766415	0.00013521	3.23865e-06	0.00011564	0.000115155	0.000125345	0.00113077	0.000181599		12.8022			0.000502896	0.000296491	0.0694507	0.000188863	7.18633e-05	1.22944	8.83341e-05	0.886974	10.571					0.711922	7.64205e-05	107.344	171.177	57				0.711803	7.52445e-05
09	MAD03-Seq9-50um		2022-08-30		0.000401062	0.000131101	1.22452e-05	0.000126211	0.00199181	0.000144199	-1.81409e-06	0.000111098	-0.000108656	0.000130074	0.000769083	0.000128028	1.37833e-06	0.000103682	0.000122152	0.000105237	0.00123316	0.000174816		11.8366			0.000442046	0.00023728	0.0642338	0.000164344	7.91809e-05	1.13719	6.26454e-05	0.820304	9.7734					0.712008	8.51036e-05	119.526	292.651	57				0.71188	8.08761e-05
10	MAD01-Seq1-50um		2022-09-01		0.000435628	0.000134915	1.25846e-05	0.000131467	0.00207578	0.000145644	-2.1138e-06	0.000100198	-0.000100593	0.00013196	0.000699262	9.6428e-05	-1.40349e-06	0.000120261	3.57476e-05	9.60851e-05	0.000365468	0.000121216		12.3567			0.000585783	0.000333453	0.0670362	0.000228101	8.88054e-05	1.18642	9.1373e-05	0.856025	10.2038					0.711945	5.28054e-05	74.1706	203.343	57				0.711797	5.58173e-05
11	MAD02-Seq1-50um		2022-09-01		0.000431105	0.000109665	2.78266e-06	9.5544e-05	0.00209305	0.000120371	-8.70565e-06	0.000111778	-0.000104776	0.00012687	0.000733488	0.000116648	1.2846e-07	0.000124882	6.17591e-05	0.000125307	0.000653296	0.000157838		11.958			0.000571927	0.000320115	0.064851	0.000225585	9.83012e-05	1.14816	9.11271e-05	0.828413	9.8743					0.711928	5.89641e-05	82.8232	179.627	58				0.711791	6.13288e-05
12	MAD03-Seq1-50um		2022-09-01		0.000433914	0.000121544	8.0037e-06	0.000136694	0.00208374	0.00014163	-2.2849e-07	0.000131652	-0.000100969	0.000139635	0.000753901	0.000113064	4.92801e-06	0.000110225	7.01581e-05	0.000103842	0.000802672	0.000164289		11.9547			0.000590872	0.000340514	0.0648746	0.000219472	9.08226e-05	1.14781	9.62489e-05	0.828218	9.87142					0.711993	5.58029e-05	78.3757	270.581	56				0.711853	5.74516e-05
13	MAD01-Seq2-50um		2022-09-01		0.000425371	0.000141919	5.69206e-06	0.000112248	0.00208808	0.000143669	2.3727e-06	0.000125613	-9.76989e-05	0.000157623	0.000759232	0.000103155	9.21361e-07	0.00014767	8.78627e-05	0.000123102	0.000856993	0.000145407		12.4334			0.00063187	0.000360812	0.0674602	0.000232944	0.000100239	1.19362	9.65709e-05	0.861284	10.2667					0.711963	5.78741e-05	81.288	229.321	59				0.711827	5.88442e-05
14	MAD02-Seq2-50um		2022-09-01		0.000434301	0.000122649	2.41416e-06	0.000124935	0.00209683	0.000127029	-1.01229e-05	8.72808e-05	-0.000100241	0.000118284	0.000773364	0.000114582	3.92859e-06	0.000122822	0.000103599	0.000129487	0.000974258	0.00018487		12.6085			0.000638054	0.000373077	0.0683785	0.000247932	0.000102061	1.21033	0.000102892	0.873394	10.4111					0.711989	4.86538e-05	68.335	265.081	58				0.711837	4.8002e-05
15	MAD03-Seq2-50um		2022-09-01		0.000438638	0.000105074	1.5559e-05	0.000107987	0.00209181	0.000137575	-1.35429e-05	0.000131917	-9.83568e-05	0.000141841	0.000791785	9.86605e-05	-3.72812e-06	0.000105733	0.000107355	0.000128381	0.00111629	0.000185337		12.6476			0.000621263	0.00034533	0.0685894	0.000240829	9.28112e-05	1.21419	9.9278e-05	0.876109	10.4433					0.711962	4.92309e-05	69.1482	227.639	59				0.711798	5.2626e-05
16	MAD01-Seq5-50um		2022-09-05		0.00040015	0.000132389	1.30249e-05	0.000102087	0.00194796	0.000146294	3.03759e-06	0.000104834	-9.54249e-05	0.000126441	0.000641107	0.000114294	-4.15484e-06	0.000120857	4.15463e-05	0.000119388	0.000302821	0.000108714		12.7238			0.00067815	0.000384966	0.0690241	0.000266042	0.000102913	1.22094	0.000111402	0.88124	10.507					0.711945	4.79057e-05	67.2884	204.323	57				0.711778	4.95631e-05
17	MAD02-Seq5-50um		2022-09-05		0.000393499	0.000112403	7.99103e-06	0.000117973	0.00195519	0.000140273	1.69247e-06	0.000103912	-0.00010514	0.00012693	0.000671685	0.000117191	-1.89064e-06	0.000114079	5.98653e-05	0.000114321	0.000530281	0.000187164		12.4106			0.000697549	0.000401283	0.0673514	0.000260892	0.000112664	1.19096	0.000104655	0.859576	10.2482					0.711974	5.51091e-05	77.4032	245.139	58				0.711818	5.82346e-05
18	MAD03-Seq5-50um		2022-09-05		0.000399884	0.000107956	9.54082e-06	0.000118548	0.00195426	0.000139945	8.73141e-06	0.000101872	-9.99313e-05	0.000131077	0.000681622	0.000126259	-1.86116e-06	0.000106263	7.18977e-05	0.000117606	0.000645139	0.000231028		12.726			0.000688112	0.000392027	0.069022	0.000271694	0.000113839	1.22117	9.9023e-05	0.881359	10.5085					0.711905	7.14372e-05	100.347	147.091	57				0.711742	6.6392e-05
19	MAD01-Seq6-50um		2022-09-05		0.000398328	0.000132615	4.99167e-06	0.000121728	0.00194776	0.000141927	3.88581e-06	0.000124239	-0.000101088	0.000123594	0.00066077	9.34996e-05	-2.10775e-07	0.000123495	5.25644e-05	0.000122364	0.000493561	0.000142488		12.2973			0.000637825	0.000373394	0.0667157	0.000249554	0.000104476	1.18031	0.000103275	0.851826	10.1546					0.711987	6.12243e-05	85.9908	262.122	57				0.711819	5.52016e-05
20	MAD02-Seq6-50um		2022-09-05		0.000397704	0.000132252	4.71931e-06	0.000142967	0.00195426	0.000126485	3.88398e-06	0.000118013	-0.000100252	0.000125922	0.000684673	0.00012111	-4.37675e-06	0.00011233	6.64731e-05	0.000131939	0.000656896	0.000213359		12.632			0.000685144	0.000405173	0.0685658	0.000257422	0.000111023	1.21234	0.000113172	0.874969	10.4308					0.711978	4.65696e-05	65.4087	250.625	58				0.711819	4.63136e-05
21	MAD03-Seq6-50um		2022-09-05		0.000394692	0.00012269	6.64769e-06	0.00013198	0.00194962	0.000137716	1.70565e-06	0.000110768	-8.93595e-05	0.000116843	0.000691896	0.000115413	9.2759e-07	0.000108537	7.35837e-05	0.000120634	0.000743109	0.000236111		12.0287			0.000629296	0.000360462	0.0652377	0.000239647	9.18502e-05	1.15433	8.91133e-05	0.833167	9.93256					0.711996	6.39428e-05	89.8079	274.923	56				0.711854	6.65021e-05
																																						Average	0.711957							Average	0.711821
																																						2 s.d.	6.01169e-05							2 s.d.	6.30563e-05
																																						2 s.d. ppm	84.4389							2 s.d. ppm	88.5845
01	MAD01-Seq4-25um		2022-08-30		0.000437769	0.000120243	1.1592e-05	0.000135176	0.00208737	0.000130554	8.87224e-06	9.41392e-05	-9.71451e-05	0.000140854	0.000684911	0.000117117	6.39738e-06	0.00011239	3.63964e-05	0.000111974	0.000278485	0.000114277		3.48371			0.000153741	8.46652e-05	0.0189082	6.61046e-05	8.55731e-06	0.33443	2.3228e-05	0.241316	2.87657					0.711955	7.38403e-05	103.715	217.687	58				0.711825	8.74499e-05
02	MAD02-Seq4-25um		2022-08-30		0.000431914	0.000135763	5.82373e-06	0.000109992	0.00207041	0.000133202	1.05505e-05	0.000130419	-0.000115238	0.000139248	0.00068248	0.000106014	3.57311e-06	0.000111701	2.96373e-05	0.000130788	0.000321911	0.000103294		3.48847			0.000154921	9.53599e-05	0.0189415	5.48761e-05	4.06958e-05	0.33489	2.38417e-05	0.241635	2.88046					0.711923	7.57418e-05	106.391	172.35	56				0.711788	0.000100841
03	MAD03-Seq4-25um		2022-08-30		0.000423435	0.000115496	5.95446e-06	9.53771e-05	0.00207475	0.000139312	1.21907e-05	0.00011862	-0.000107409	0.000110439	0.000703286	0.000116163	1.46247e-05	0.000108794	2.88999e-05	9.56655e-05	0.000351949	0.000110809		3.50006			0.000162465	9.25461e-05	0.0189806	5.80906e-05	1.67062e-05	0.335948	3.85377e-06	0.242454	2.89					0.712033	8.91583e-05	125.217	327.363	58				0.711999	9.54088e-05
04	MAD01-Seq5-25um		2022-08-30		0.000424606	0.000144761	3.67307e-06	0.000112481	0.00206788	0.000148867	1.14375e-05	0.000117469	-0.000101737	0.000116923	0.000692685	0.000132127	5.10194e-06	0.000102206	3.79618e-05	9.91791e-05	0.000392063	0.000108758		3.51921			0.000157088	9.55594e-05	0.0190996	6.12405e-05	1.82123e-05	0.337817	2.54991e-05	0.243757	2.90577					0.711938	8.77825e-05	123.301	193.243	58				0.711768	0.000105106
05	MAD02-Seq5-25um		2022-08-30		0.000413306	0.000104626	1.38495e-05	0.000116086	0.00206028	0.000153941	9.50797e-06	0.000125084	-9.99387e-05	0.000121544	0.000697962	0.00013084	8.71876e-06	9.97805e-05	3.72192e-05	0.00011152	0.00040917	0.000112063		3.52343			0.000156792	8.59869e-05	0.0191256	5.73879e-05	2.41866e-05	0.338193	1.96983e-05	0.244051	2.90924					0.711979	8.2772e-05	116.256	251.93	58				0.711833	9.26391e-05
06	MAD03-Seq5-25um		2022-08-30		0.000427601	0.000124356	1.09642e-05	0.00012614	0.00207141	0.000167267	6.49449e-06	0.000126331	-9.70358e-05	0.000119797	0.00071053	0.000108772	2.68024e-06	0.00013025	3.38484e-05	0.000116481	0.000413043	0.000125288		3.5047			0.0001571	9.21532e-05	0.0190061	5.96259e-05	3.19248e-05	0.336424	2.38308e-05	0.242769	2.89377					0.711999	9.7181e-05	136.49	278.998	59				0.71186	9.63731e-05
07	MAD01-Seq6-25um		2022-08-30		0.000420975	0.000122101	1.77378e-05	0.000138487	0.00206556	0.000144741	1.06257e-05	9.63463e-05	-9.92988e-05	0.000123601	0.000700648	0.00010768	1.14221e-05	0.000122922	4.56774e-05	0.000112543	0.000442649	0.000105934		3.52935			0.000161506	6.48802e-05	0.0191437	5.48112e-05	1.49552e-05	0.338776	2.08824e-05	0.24445	2.9141					0.711886	7.91957e-05	111.248	120.186	57				0.711764	8.75022e-05
08	MAD02-Seq6-25um		2022-08-30		0.000420221	0.000118299	6.42498e-06	0.000136964	0.00205607	0.000125299	6.51509e-06	0.00012454	-0.000108529	0.00013622	0.000705561	0.000119767	7.12502e-06	0.000122423	4.59023e-05	0.000111127	0.000456929	0.00010924		3.54857			0.00017239	9.76189e-05	0.0192649	6.7235e-05	3.42947e-05	0.340599	2.28968e-05	0.245774	2.92995					0.711926	8.30185e-05	116.611	177.473	58				0.711797	9.13594e-05
09	MAD03-Seq6-25um		2022-08-30		0.000428703	0.000121954	8.18288e-06	0.000127161	0.00205638	0.000159898	3.20123e-06	0.000111455	-0.00011145	0.000113605	0.000696105	0.000133684	1.04165e-05	0.000116579	5.17298e-05	0.000130955	0.000464172	0.000112477		3.53942			0.000160617	9.26072e-05	0.0192291	6.22234e-05	3.35779e-05	0.339733	1.96891e-05	0.245146	2.92239					0.71191	8.33088e-05	117.022	154.244	59				0.711789	0.000105478
10	MAD01-Seq1-25um		2022-09-05		0.000421423	0.000113336	3.08736e-06	0.000118215	0.00205598	0.000137931	-6.794e-06	0.000128489	-8.4011e-05	0.000137561	0.000663187	0.000117112	1.3588e-05	0.000111916	1.97625e-05	0.000117179	0.000191225	0.000115377		3.54622			0.000214604	0.000130024	0.0192548	8.20943e-05	1.76126e-05	0.3401	2.78696e-05	0.245526	2.92828					0.711935	7.98138e-05	112.108	190.341	59				0.711801	9.69539e-05
11	MAD02-Seq1-25um		2022-09-05		0.000428123	0.000131682	9.14178e-06	0.000124984	0.00205726	0.000129668	-3.85628e-06	9.36684e-05	-8.88572e-05	0.000133865	0.000667301	0.000120993	7.33938e-06	0.000123189	1.97091e-05	0.000110481	0.000218843	0.000130456		3.58579			0.000214964	0.000114087	0.0194735	7.79657e-05	2.80684e-05	0.34391	3.83365e-05	0.248277	2.96092					0.711969	7.65142e-05	107.468	237.768	58				0.711746	9.42363e-05
12	MAD03-Seq1-25um		2022-09-05		0.000424836	0.000116906	9.04462e-06	0.000125619	0.0020599	0.000121175	-4.25228e-07	0.000133678	-9.47787e-05	0.000122127	0.000667606	0.000120344	8.3872e-06	0.000119618	1.52178e-05	0.000112291	0.000232885	0.000129298		3.54253			0.000210096	0.000124882	0.0192328	7.78715e-05	2.9495e-05	0.339757	2.54215e-05	0.245263	2.92519					0.711931	7.1421e-05	100.32	184.674	57				0.711734	0.000103415
13	MAD01-Seq2-25um		2022-09-05		0.000424006	0.000124172	7.10893e-06	0.000110268	0.00205528	0.000134561	-3.64175e-06	0.000106567	-9.32048e-05	0.000122937	0.000664091	0.000114047	4.4185e-06	0.000117502	2.1255e-05	0.000117279	0.000252643	0.000139716		3.43572			0.000238152	0.000143859	0.0186894	9.76844e-05	4.95144e-05	0.329592	3.26244e-05	0.237928	2.83697					0.712006	7.42208e-05	104.242	289.043	60				0.711854	7.50397e-05
14	MAD02-Seq2-25um		2022-09-05		0.000422288	0.000122762	6.27609e-06	0.00011386	0.00205213	0.000140509	-8.07182e-07	0.000109249	-8.75768e-05	0.000114271	0.000665379	0.000117784	9.04554e-06	0.000108176	2.28945e-05	0.000116561	0.000258149	0.000130947		3.35442			0.000232734	0.000134333	0.0182585	8.99291e-05	3.01156e-05	0.321827	3.31765e-05	0.232313	2.76982					0.712019	7.91136e-05	111.112	307.966	58				0.711858	7.43689e-05
15	MAD03-Seq2-25um		2022-09-05		0.000420379	0.000110382	9.43623e-06	0.00012207	0.00205399	0.000133834	1.17861e-06	0.000118253	-9.17346e-05	0.000122291	0.000671635	0.000116206	8.2945e-06	0.000116554	2.19752e-05	0.000124018	0.000266199	0.00012887		3.37451			0.000230515	0.000130739	0.0183536	8.88776e-05	3.03029e-05	0.323786	3.11551e-05	0.233711	2.7864					0.711981	7.03864e-05	98.8599	254.305	57				0.711801	9.78087e-05
16	MAD01-Seq3-25um		2022-09-05		0.000418563	0.000145579	1.29701e-05	0.000122096	0.00204733	0.000151832	1.27962e-06	0.000108524	-9.69974e-05	0.00011462	0.000672258	0.000115759	1.78298e-05	0.000116934	2.68234e-05	0.000104137	0.000274484	0.000115131		3.40779			0.000244823	0.000137673	0.0185347	8.40463e-05	3.9633e-05	0.3269	2.50843e-05	0.235963	2.81388					0.71195	6.8365e-05	96.0251	210.311	59				0.711784	8.12426e-05
17	MAD02-Seq3-25um		2022-09-05		0.000421232	0.00013845	6.57055e-06	0.000112128	0.00204946	0.000139489	-4.4719e-06	0.000107477	-9.27149e-05	0.000133252	0.000669252	0.000106284	1.32471e-05	0.000123951	1.9728e-05	0.000124112	0.000285048	0.000125783		3.39059			0.000234937	0.000141429	0.018446	9.38367e-05	3.84432e-05	0.325308	2.77219e-05	0.23483	2.79966					0.712022	7.06654e-05	99.2461	311.222	56				0.711869	8.82239e-05
18	MAD03-Seq3-25um		2022-09-05		0.000420914	0.000126364	8.07678e-06	0.000118307	0.00204375	0.000134192	-1.65997e-06	0.000109911	-9.66329e-05	0.000126702	0.00067127	0.000108718	5.70987e-06	0.000119177	1.92188e-05	0.000106639	0.000280587	0.00013662		3.35599			0.000218757	0.000126038	0.0182497	8.31643e-05	2.87375e-05	0.322016	2.93998e-05	0.232445	2.7711					0.712043	9.38874e-05	131.856	341.032	59				0.711848	0.000107625
19	MAD01-Seq5-25um		2022-09-06		0.00041464	0.000120037	5.5058e-06	0.000122368	0.00199292	0.000140886	6.98918e-06	0.000125602	-8.78808e-05	0.000120264	0.000637985	0.000121856	-1.60657e-06	0.000112325	1.19054e-05	0.00012044	0.000112767	0.000121472		3.48805			0.000205498	0.000125703	0.0189289	7.66458e-05	1.95308e-05	0.334701	1.91671e-05	0.241569	2.88032					0.711968	7.13028e-05	100.149	235.993	57				0.711835	8.43516e-05
20	MAD02-Seq5-25um		2022-09-06		0.000408026	0.000137774	6.33162e-06	0.000112524	0.00198194	0.000127532	9.46099e-06	0.000101603	-9.71856e-05	0.000136118	0.000644158	0.000113455	-2.68766e-06	0.000133184	1.36849e-05	0.000114203	0.000158091	0.000117726		3.49602			0.000203012	0.000112816	0.0189664	6.65388e-05	3.80111e-05	0.335451	3.13477e-05	0.242133	2.88686					0.711971	7.50813e-05	105.456	239.719	58				0.711823	9.76136e-05
21	MAD03-Seq5-25um		2022-09-06		0.000406695	0.000108357	3.09636e-06	0.000122317	0.001975	0.000124533	5.19538e-06	0.000104883	-9.32588e-05	0.000137412	0.000643899	0.000109008	-4.71172e-06	0.000110784	2.14767e-05	0.000103739	0.000188437	0.00011645		3.46143			0.000194631	0.000112061	0.0187764	7.53598e-05	2.47128e-05	0.332134	2.68125e-05	0.239714	2.85826					0.711886	8.13878e-05	114.327	120.124	55				0.71176	0.00010505
																																						Average	0.711963							Average	0.711816
																																						2 s.d.	9.17612e-05							2 s.d.	0.000115082
																																						2 s.d. ppm	128.885							2 s.d. ppm	161.674
01	MAD01-Seq1-13um		2022-08-30		0.000430679	0.00015369	1.13081e-05	0.000118164	0.00214083	0.00013495	3.09754e-06	0.000121226	-9.73837e-05	0.000138276	0.000664503	0.000127262	8.85276e-06	9.7198e-05	9.29914e-06	0.000104704	0.000107357	0.000124699		0.823781			4.74933e-05	2.06129e-05	0.00446746	1.73459e-05	6.41505e-06	0.0790902	-1.88863e-05	0.0570548	0.680168					0.71185	0.000159811	224.501	70.0045	57				0.712248	0.000280299
02	MAD02-Seq1-13um		2022-08-30		0.000438156	0.000134239	1.96463e-05	0.00013454	0.002126	0.000118097	1.19142e-05	0.000110159	-9.7858e-05	0.000111545	0.000688388	0.000114026	2.79834e-08	8.69907e-05	3.54916e-06	0.000112295	0.000102824	9.60444e-05		0.840918			4.53529e-05	1.22401e-05	0.00457098	1.20104e-05	9.0538e-07	0.0807152	4.27095e-06	0.0582608	0.694324					0.712114	0.000158986	223.26	440.477	57				0.711916	0.000268266
03	MAD03-Seq1-13um		2022-08-30		0.000445934	0.000144874	1.66802e-05	0.000110864	0.00212358	0.000123804	8.54261e-07	9.51833e-05	-0.000106756	0.0001257	0.000679321	0.000127772	-1.19307e-06	0.000115545	1.87282e-05	0.000133666	0.000124285	0.000103366		0.831938			3.48731e-05	1.86004e-05	0.00452142	1.68898e-05	5.56979e-06	0.079877	1.40757e-05	0.0576082	0.686893					0.711696	0.000164895	231.692	-146.107	57				0.711424	0.000285932
04	MAD01-Seq2-13um		2022-08-30		0.000433116	0.000128824	1.66177e-05	0.000108921	0.00212953	0.000152136	-5.37387e-06	0.00011155	-0.000114982	0.000124904	0.000676685	9.27802e-05	-2.84017e-06	0.000124677	1.14742e-05	0.000100983	0.000130291	9.91543e-05		0.830181			4.77374e-05	1.99583e-05	0.00450261	1.26634e-05	4.66231e-06	0.0796892	9.1101e-07	0.0575088	0.685431					0.712034	0.000154362	216.79	328.659	57				0.711976	0.000260056
05	MAD02-Seq2-13um		2022-08-30		0.000431137	0.000128865	3.91906e-06	0.000121045	0.00211577	0.000198562	-9.69508e-07	0.000112506	-9.89592e-05	0.000156936	0.000671784	0.000103142	-1.62196e-06	0.000108984	2.44281e-05	0.000139773	0.000135729	0.000114093		0.820657			4.26515e-05	3.29139e-05	0.00444738	3.89036e-06	-5.53458e-08	0.0787982	1.8005e-06	0.0568501	0.67756					0.711946	0.000155453	218.349	205.707	58				0.711991	0.000247121
06	MAD03-Seq2-13um		2022-08-30		0.000431975	0.000111558	7.70854e-06	0.000102821	0.00212598	0.000135886	-5.06872e-06	0.000138657	-0.000105429	0.000132228	0.000683988	0.000107637	1.00772e-05	0.000106366	1.48514e-05	0.000137974	0.000141016	0.000117061		0.856171			4.45377e-05	2.08516e-05	0.00464674	7.76694e-06	2.97245e-06	0.0821778	-5.99327e-06	0.0592881	0.706882					0.711879	0.000175823	246.985	110.447	58				0.711852	0.000289117
07	MAD01-Seq3-13um		2022-08-30		0.000435039	0.000135434	1.28371e-05	0.000120165	0.0021176	0.000137894	-5.40778e-06	0.000109163	-0.000108776	0.000113164	0.000681139	0.000105845	-6.31098e-07	0.000122048	2.21815e-05	0.000110477	0.000153227	0.000130448		0.828966			3.3876e-05	2.56165e-05	0.0045094	3.50738e-05	-1.86221e-06	0.0795785	7.62256e-06	0.0574136	0.684406					0.711832	0.000146719	206.114	44.2566	57				0.711462	0.000290444
08	MAD02-Seq3-13um		2022-08-30		0.00043869	0.000109353	1.20489e-05	0.000127978	0.00213259	0.000151516	8.01884e-08	0.000102469	-0.000110346	0.000115356	0.000679827	0.000137857	8.21142e-06	0.000129889	1.74613e-05	0.000118047	0.000145913	0.000135903		0.819448			3.37678e-05	1.94111e-05	0.00443043	1.68293e-05	1.50023e-05	0.078646	6.3769e-06	0.0567587	0.676551					0.712045	0.000187307	263.056	344.217	59				0.71186	0.000307705
09	MAD03-Seq3-13um		2022-08-30		0.000431007	0.000125335	3.90423e-06	0.00012415	0.00211827	0.000146074	6.46349e-07	0.000132509	-0.000119008	0.000112801	0.000679774	0.000135375	1.13756e-05	0.000118084	1.40697e-05	0.000106429	0.000151712	0.000135452		0.821556			3.94414e-05	2.62451e-05	0.00446638	1.30971e-05	1.08382e-05	0.0788663	-1.14592e-05	0.0569046	0.678295					0.711927	0.000197727	277.735	179.076	58				0.712086	0.000293243
10	MAD01-Seq1-13um		2022-09-02		0.000432109	0.000130513	7.53623e-06	0.000116347	0.00209184	0.000131254	-1.80574e-06	0.00010488	-9.74876e-05	0.000118088	0.000668504	0.000114448	3.85266e-06	0.00010023	1.23722e-05	0.000139192	7.04643e-05	0.000120828		0.831602			5.45246e-05	2.92332e-05	0.00450746	1.88719e-05	5.54822e-06	0.0797726	8.3725e-06	0.057573	0.686665					0.711839	0.000156644	220.055	54.9002	57				0.711519	0.000241135
11	MAD02-Seq1-13um		2022-09-02		0.000432144	0.000117348	1.08708e-05	0.000113246	0.00209456	0.000146507	-9.06302e-06	0.000111991	-0.000100528	0.00012642	0.000672709	0.000104948	2.57336e-06	0.000119763	1.24164e-05	0.000119647	7.25869e-05	0.000115782		0.836282			4.25152e-05	2.89134e-05	0.00453681	3.40069e-05	5.17939e-06	0.080217	3.38928e-06	0.0579044	0.690528					0.711965	0.000192531	270.422	232.39	57				0.711699	0.000264413
12	MAD03-Seq1-13um		2022-09-02		0.000431165	0.000113295	1.02809e-05	0.000122208	0.00209548	0.000160246	5.56223e-07	0.00011979	-0.000101204	0.000126385	0.000676599	0.000104684	4.14183e-06	0.000127088	1.49802e-05	0.000118011	7.82813e-05	0.000123478		0.826007			4.21189e-05	2.58706e-05	0.00448206	1.93313e-05	1.74183e-05	0.0792341	6.00692e-06	0.0571832	0.682041					0.711753	0.000153616	215.828	-66.0409	56				0.711621	0.000235613
13	MAD01-Seq2-13um		2022-09-02		0.000426679	0.000131865	9.39852e-06	0.000127907	0.00209534	0.000131976	-7.44903e-06	0.000115098	-0.000104638	0.000113385	0.000670379	0.000114308	3.96121e-06	0.000109955	1.43812e-05	0.000105996	8.05499e-05	0.000126852		0.854805			5.91297e-05	2.56663e-05	0.00463749	2.49379e-05	1.82718e-05	0.0819868	1.47289e-05	0.059193	0.705816					0.712094	0.000142801	200.537	413.082	56				0.711762	0.000290438
14	MAD02-Seq2-13um		2022-09-02		0.000430246	0.000119911	6.78755e-06	0.0001121	0.00208886	0.000138836	3.82994e-06	0.000120987	-9.6677e-05	0.00011396	0.000677084	0.000104688	3.22107e-06	0.000124034	1.14436e-05	0.000113452	8.08972e-05	0.000105573		0.836012			4.54873e-05	3.72752e-05	0.00455079	1.95798e-05	2.98315e-06	0.0801775	1.24848e-05	0.0578791	0.690301					0.711946	0.00014597	205.03	204.535	57				0.711591	0.000241219
15	MAD03-Seq2-13um		2022-09-02		0.000430021	0.000125315	4.32661e-06	0.000118601	0.00209322	0.000141271	7.59828e-06	0.000125732	-0.000100405	0.000127708	0.000677848	0.000111815	-1.49299e-06	0.000116463	1.40144e-05	0.000113695	8.1985e-05	0.000107427		0.827015			5.07659e-05	3.73677e-05	0.004498	1.43632e-05	8.37272e-06	0.079317	9.91166e-06	0.0572539	0.682867					0.711835	0.000209437	294.221	49.3933	57				0.711595	0.000329447
16	MAD01-Seq1-13um		2022-09-06		0.000404482	0.000120368	1.36704e-05	0.000107798	0.00197764	0.0001276	1.01432e-05	0.000102738	-0.000100163	0.000122362	0.000626074	0.000110708	2.16995e-06	0.000122773	1.09733e-05	0.000110134	8.62687e-05	0.000136056		0.880542			5.29193e-05	1.92686e-05	0.00478227	1.84911e-05	8.61679e-06	0.0844639	1.30067e-05	0.0609709	0.727065					0.711994	0.000166688	234.115	271.99	57				0.711606	0.000235039
17	MAD02-Seq1-13um		2022-09-06		0.000409439	0.000115008	7.48648e-06	0.00013511	0.00197699	0.000147143	2.05782e-06	0.000114896	-0.000102788	0.000127492	0.00062222	0.00011275	1.35774e-05	0.000137724	1.26897e-05	0.000104075	8.65259e-05	0.000116359		0.871789			4.20013e-05	2.57947e-05	0.00473088	2.13686e-05	7.85868e-06	0.0836215	1.95026e-06	0.0603616	0.719836					0.711936	0.000153803	216.035	190.804	57				0.711832	0.000282253
18	MAD03-Seq1-13um		2022-09-06		0.000402905	0.000125077	8.65616e-06	0.000110202	0.00198317	0.000153831	8.06953e-06	0.000125322	-9.98405e-05	0.000127525	0.000619415	0.000105417	1.24396e-05	0.000119008	1.29087e-05	0.000103827	8.84724e-05	0.000121839		0.874523			4.25968e-05	2.29775e-05	0.00473496	1.10367e-05	4.62285e-06	0.0838771	7.8649e-06	0.0605463	0.722093					0.711974	0.000152453	214.127	244.993	57				0.711688	0.000235697
19	MAD01-Seq2-13um		2022-09-06		0.000409061	0.000128245	6.2923e-06	0.000107426	0.00197934	0.000143043	2.67349e-06	0.000114921	-0.000104945	0.000133491	0.000624379	0.000110788	1.07678e-05	0.000126752	9.45513e-06	0.000104982	8.2779e-05	0.000114693		0.889332			4.58597e-05	2.57651e-05	0.00482969	1.96887e-05	8.28594e-06	0.0853068	3.09092e-06	0.0615782	0.734326					0.711925	0.000135079	189.738	174.92	57				0.71186	0.000200883
20	MAD02-Seq2-13um		2022-09-06		0.000408786	0.000125523	6.81993e-06	0.000118505	0.00198674	0.000137365	8.77488e-06	0.000110997	-9.8791e-05	0.0001212	0.000626684	0.000118539	1.13297e-05	0.000130621	1.35373e-05	0.000122569	9.18805e-05	0.000112224		0.892898			3.89884e-05	3.52723e-05	0.00483288	8.1856e-06	6.19422e-06	0.0856459	3.59688e-06	0.0618224	0.737264					0.711904	0.000170769	239.877	145.6	56				0.711872	0.000206481
21	MAD03-Seq2-13um		2022-09-06		0.0004127	0.000104631	1.26829e-05	0.000117369	0.00198289	0.000135872	5.65164e-06	0.000110752	-9.29922e-05	0.000119558	0.00062651	0.000115314	9.06719e-06	0.000113906	8.74199e-06	0.000110121	8.77919e-05	0.00011729		0.862853			4.14758e-05	2.53615e-05	0.004682	2.07017e-05	3.85652e-06	0.0827648	2.13502e-06	0.0597457	0.712457					0.712046	0.000184352	258.904	346.238	56				0.711981	0.000283856
																																						Average	0.71193							Average	0.711783
																																						2 s.d.	0.000213939							2 s.d.	0.000428983
																																						2 s.d. ppm	300.505							2 s.d. ppm	602.688
01	MAD01-Seq3-10um		2022-09-06		0.000405339	0.000113951	9.7667e-06	0.000111268	0.00197658	0.000128217	-4.39843e-07	0.000129042	-0.000101488	0.000140675	0.000619732	0.000116699	5.99646e-06	0.000106821	1.06388e-05	9.6707e-05	6.01303e-05	0.000116653		0.456998			3.09927e-05	1.57282e-05	0.00249077	7.57451e-06	8.12324e-06	0.0438569	2.2009e-06	0.0316362	0.377326					0.711627	0.0003139	441.102	-243.072	57				0.711295	0.000577597
02	MAD02-Seq3-10um		2022-09-06		0.000414395	0.000117171	1.04095e-05	0.000129499	0.00197589	0.00012664	1.9516e-07	0.000107384	-0.000101033	0.000131242	0.000617029	0.000120322	4.00525e-07	0.000123483	5.17997e-06	0.000111128	7.05544e-05	0.000123587		0.446604			2.54585e-05	1.21781e-05	0.00242207	4.93275e-06	5.64611e-06	0.0428446	4.53994e-06	0.0309242	0.368737					0.711883	0.000314227	441.403	116.551	58				0.711637	0.000604985
03	MAD03-Seq3-10um		2022-09-06		0.000411249	0.000118933	5.33659e-06	0.000118035	0.00197491	0.000130206	-3.4819e-06	0.000111925	-9.84504e-05	0.000123398	0.000621151	0.000107997	4.48435e-06	0.000111155	1.22943e-05	0.000116787	7.11887e-05	0.000111548		0.458217			2.22834e-05	2.15859e-05	0.00247828	9.56379e-06	-4.5347e-06	0.0439651	8.77486e-07	0.0317203	0.378326					0.71171	0.00028472	400.051	-126.276	56				0.711592	0.000622134
04	MAD01-Seq4-10um		2022-09-06		0.000410647	0.000127574	8.33484e-06	0.000105056	0.00197326	0.000146702	1.75747e-06	0.000120058	-9.01296e-05	0.000132286	0.000621589	0.000104054	2.67239e-06	9.94069e-05	9.18806e-06	0.000124782	7.29687e-05	0.000119238		0.470015			2.68172e-05	1.21751e-05	0.00255912	-1.48775e-06	1.88548e-06	0.0450912	3.47777e-06	0.0325416	0.388065					0.711856	0.000273391	384.053	79.2694	57				0.711753	0.000463065
05	MAD02-Seq4-10um		2022-09-06		0.000406494	0.000129402	8.60285e-06	0.000127836	0.00197356	0.000134698	-4.22682e-08	0.000107556	-9.75864e-05	0.000120572	0.000618682	0.000110502	1.66343e-06	0.000134257	1.14873e-05	0.000109657	7.12359e-05	0.000129108		0.45179			2.40606e-05	8.88272e-06	0.00245164	4.26793e-06	5.43506e-07	0.043344	6.47497e-06	0.0312777	0.373021					0.711794	0.000355881	499.978	-7.93062	58				0.711598	0.000546374
06	MAD03-Seq4-10um		2022-09-06		0.000406156	0.000130207	5.98989e-06	0.00010824	0.00197489	0.000147468	5.23374e-06	9.84918e-05	-9.13195e-05	0.000124007	0.000619844	0.000112813	4.07728e-06	0.000114474	4.60116e-06	0.000128138	7.5256e-05	0.000130232		0.450769			2.70286e-05	1.62517e-05	0.00244715	6.78585e-06	-5.33872e-06	0.0432368	4.27766e-06	0.0312062	0.372169					0.711931	0.000288961	405.884	184.503	57				0.711577	0.000505019
07	MAD01-Seq6-10um		2022-09-06		0.000414465	0.000123134	9.21126e-06	0.000123794	0.0019813	0.00015783	-7.56258e-08	0.000115289	-9.42933e-05	0.000127806	0.000625148	0.00011487	2.22226e-06	0.000113081	1.62209e-05	0.000119739	8.2258e-05	0.000127178		0.463271			2.21945e-05	8.36774e-06	0.00251762	2.5392e-05	-1.85261e-06	0.044447	2.05411e-06	0.0320755	0.382488					0.711736	0.000279844	393.185	-90.5017	56				0.711562	0.000527566
08	MAD02-Seq6-10um		2022-09-06		0.000417476	0.000117969	8.34063e-06	0.000119473	0.0019866	0.000141129	9.50313e-06	0.000109884	-9.79023e-05	0.000115573	0.000622393	0.000119467	4.40766e-06	0.000110575	1.26904e-05	0.000117852	9.20742e-05	0.000123725		0.457			2.8497e-05	1.74425e-05	0.00248404	1.53647e-05	6.07924e-06	0.0438516	7.86545e-07	0.0316404	0.3773					0.711759	0.000268208	376.823	-57.3706	56				0.711747	0.000465157
09	MAD03-Seq6-10um		2022-09-06		0.000408737	0.000132498	1.08009e-05	0.000138916	0.00199121	0.000136602	1.30978e-05	0.000115197	-9.37997e-05	0.000116525	0.00062812	0.000120902	6.4464e-06	0.000124662	9.1107e-06	0.000125105	8.87707e-05	0.000116419		0.473207			3.55375e-05	1.98348e-05	0.00256017	5.27978e-06	5.8372e-06	0.0453961	1.03365e-07	0.0327542	0.390685					0.711733	0.000229691	322.721	-93.5815	58				0.711579	0.000428519
10	MAD01-Seq1-10um		2022-09-07		0.000420481	0.000107349	1.0281e-05	0.00012784	0.00203859	0.000156308	1.49e-05	0.000122246	-9.41108e-05	0.000132322	0.000642065	0.000107325	4.93874e-06	0.000115756	8.11393e-06	9.87925e-05	5.57238e-05	0.000114484		0.41781			2.29344e-05	1.69747e-05	0.00227678	1.43893e-05	3.19114e-06	0.0400563	7.61633e-06	0.0289174	0.344972					0.711862	0.000236017	331.549	86.4401	54				0.711241	0.000458417
11	MAD02-Seq1-10um		2022-09-07		0.000420368	0.000129191	3.16651e-06	0.000122777	0.00204135	0.000140613	1.48281e-05	0.000105276	-9.40456e-05	0.00013144	0.000644288	0.000120341	6.24189e-06	0.000111554	1.11306e-05	0.000102115	6.348e-05	0.000118923		0.421668			2.43351e-05	1.89616e-05	0.00229431	6.65125e-06	-2.89661e-06	0.0404211	5.47184e-06	0.0291894	0.348149					0.712057	0.000330993	464.841	361.361	56				0.71156	0.000580578
12	MAD03-Seq1-10um		2022-09-07		0.000417289	0.000114941	-3.9317e-07	0.000123004	0.00204098	0.000141924	1.76643e-05	0.000116083	-8.33057e-05	0.000134122	0.000643758	0.000120944	5.21373e-06	0.000112267	9.51998e-06	0.000126724	6.52159e-05	0.00011865		0.419571			2.96841e-05	2.29273e-05	0.00227623	8.42454e-06	-3.66425e-06	0.0402217	1.88986e-06	0.0290392	0.346419					0.711869	0.000248342	348.858	97.2259	57				0.711827	0.00060271
13	MAD01-Seq2-10um		2022-09-07		0.000422017	0.000111232	1.61373e-06	0.000122506	0.00204164	0.000121545	9.23611e-06	0.000109774	-8.5727e-05	0.000115013	0.000642404	0.000110255	7.60543e-06	0.000127393	1.38879e-05	0.000114853	6.72993e-05	0.000114736		0.416491			2.3497e-05	1.62019e-05	0.00226772	1.62499e-05	-5.25179e-06	0.0399235	3.37899e-07	0.0288184	0.343873					0.71187	0.000352819	495.624	97.9085	58				0.711682	0.000607336
14	MAD02-Seq2-10um		2022-09-07		0.000410685	0.000123098	8.48213e-07	0.000119969	0.00203692	0.000133877	1.48908e-05	0.000131011	-9.26615e-05	0.000119152	0.000639963	0.000108933	1.27894e-05	0.000105869	1.25318e-05	0.000136593	6.80679e-05	0.000114159		0.423474			3.03038e-05	1.47993e-05	0.00230126	9.74605e-06	1.13593e-06	0.0406037	-2.22019e-06	0.0293029	0.349636					0.711548	0.000322216	452.838	-353.399	57				0.711678	0.000533507
15	MAD03-Seq2-10um		2022-09-07		0.000418298	0.000124456	4.99599e-06	0.00012734	0.00203846	0.00013687	1.48954e-05	0.000110588	-9.48011e-05	0.000127578	0.000648882	0.000123242	6.3237e-06	0.000110701	9.03765e-06	0.000130014	6.95943e-05	0.000115902		0.419417			2.48423e-05	1.59785e-05	0.00228284	1.36035e-05	8.3525e-06	0.0402094	2.3161e-06	0.0290386	0.346284					0.712131	0.000293001	411.443	465.334	57				0.711979	0.000570906
16	MAD01-Seq3-10um		2022-09-07		0.00041382	0.00011265	4.02634e-06	0.00013369	0.00203708	0.000154274	1.57943e-05	0.000120909	-8.60419e-05	0.000125559	0.000641098	0.000107522	2.90412e-06	0.000117209	8.28283e-06	0.000116986	6.56666e-05	0.00013922		0.422127			2.68596e-05	1.55257e-05	0.0022882	9.83159e-06	-1.48957e-06	0.0404755	-4.77333e-07	0.0292208	0.348524					0.71194	0.000267615	375.895	197.345	58				0.711972	0.000405796
17	MAD02-Seq3-10um		2022-09-07		0.000409625	0.000114018	4.87199e-06	0.00012312	0.0020391	0.000128068	1.37945e-05	0.000116301	-8.61319e-05	0.000116467	0.00064536	0.000126453	2.27907e-06	0.00011167	1.12391e-05	0.000106069	6.90225e-05	0.000113697		0.419576			3.11583e-05	1.81428e-05	0.00227453	1.87361e-05	7.396e-06	0.0402246	1.0465e-05	0.0290478	0.346417					0.712181	0.000344203	483.308	535.035	58				0.711612	0.000539796
18	MAD03-Seq3-10um		2022-09-07		0.000414343	0.000130296	-2.20857e-06	0.000132205	0.00204037	0.000141846	1.76196e-05	0.000138178	-9.37821e-05	0.000126413	0.000642819	0.000109471	6.16197e-06	0.000105517	1.0104e-05	0.000128245	7.10425e-05	0.000127839		0.426089			3.95081e-05	1.80905e-05	0.00230799	1.7063e-05	1.43412e-05	0.0408481	-1.3105e-06	0.0294855	0.351791					0.711703	0.000347501	488.267	-136.752	58				0.711852	0.000504658
19	MAD01-Seq4-10um		2022-09-07		0.000423336	0.000123652	9.30047e-06	0.000135699	0.00203628	0.000152589	1.53832e-05	0.000120147	-8.80573e-05	0.000118128	0.000641533	0.000122897	1.01624e-05	0.000118867	9.89368e-06	0.000113825	6.63322e-05	0.000126038		0.409755			2.03553e-05	1.54283e-05	0.00222262	1.76076e-05	-3.40216e-07	0.0392823	-3.82389e-06	0.028361	0.338309					0.711899	0.000295714	415.387	139.532	57				0.711985	0.000491657
20	MAD02-Seq4-10um		2022-09-07		0.0004182	0.000102975	-4.58781e-07	0.000109838	0.0020366	0.000154493	1.37613e-05	0.000114825	-9.1922e-05	0.000113725	0.000640586	0.000119879	7.962e-06	0.000105536	1.58026e-05	0.000117665	7.08319e-05	0.000120315		0.410032			3.06682e-05	2.29649e-05	0.00222055	1.06754e-05	9.20786e-06	0.0393054	1.43469e-05	0.0283667	0.338534					0.711491	0.000345508	485.611	-433.933	57				0.710647	0.000634122
21	MAD03-Seq4-10um		2022-09-07		0.000415628	0.000126505	7.48761e-06	0.00011502	0.00203584	0.000125596	1.48037e-05	0.00011632	-8.94099e-05	0.000126418	0.000644708	0.000112056	1.03359e-05	0.000120204	1.32525e-05	0.000108223	7.25698e-05	0.000119102		0.413171			2.97483e-05	1.64565e-05	0.00224731	9.38267e-06	4.33745e-06	0.0396123	1.63264e-06	0.0285982	0.341124					0.711791	0.00028327	397.968	-12.1407	55				0.711923	0.000501169
																																						Average	0.711827							Average	0.711633
																																						2 s.d.	0.000344129							2 s.d.	0.000603391
																																						2 s.d. ppm	483.445							2 s.d. ppm	847.896
01	Sly01-Seq7-50um		2022-08-30		0.000407178	0.000137766	8.86268e-06	0.000128613	0.00200372	0.000142791	-3.86237e-07	0.00011543	-0.000106507	0.000124032	0.000704755	0.000125429	1.7725e-06	0.000128586	6.47685e-05	0.000135764	0.000656344	0.000110757		8.56625			0.000179785	6.02521e-05	0.0467115	8.58365e-05	1.74164e-05	0.822898	3.1163e-05	0.590182	7.07336					0.707876	6.37371e-05	90.04	276.737	58				0.707799	6.84377e-05
02	Sly02-Seq7-50um		2022-08-30		0.000413692	0.000136057	9.94838e-06	0.000124156	0.00199716	0.000124284	3.32894e-06	0.0001443	-0.000119787	0.000119829	0.000709934	0.000109332	2.63881e-06	0.000114168	7.71631e-05	0.000125535	0.000718121	0.00014188		8.75767			0.000182501	6.03304e-05	0.0477858	9.9823e-05	3.2129e-05	0.841312	2.27492e-05	0.603358	7.23137					0.707841	6.10791e-05	86.2893	227.568	59				0.707769	6.7217e-05
03	Sly03-Seq7-50um		2022-08-30		0.000415249	0.000130708	6.82463e-06	9.57639e-05	0.0020006	0.000141859	5.026e-06	0.000126121	-0.000111908	0.000123365	0.000719633	9.70775e-05	7.91173e-06	0.000111546	7.74677e-05	0.000109439	0.000762841	0.000129924		8.9213			0.000179485	5.9619e-05	0.0486821	6.04411e-05	3.45423e-05	0.857052	3.10366e-05	0.614627	7.36644					0.707828	6.77293e-05	95.6861	209.229	59				0.707785	7.27111e-05
04	Sly01-Seq8-50um		2022-08-30		0.000419833	9.97909e-05	4.51955e-06	0.000120306	0.00200352	0.000137519	5.37754e-06	0.000125108	-0.000101558	0.000126838	0.00073178	9.68248e-05	1.03307e-05	9.69354e-05	9.07595e-05	0.000114075	0.00084903	0.000144543		9.25895			0.000191759	6.57173e-05	0.0505127	9.67882e-05	2.40988e-05	0.889323	2.6911e-05	0.637863	7.64519					0.707865	5.56453e-05	78.6101	260.746	56				0.707798	6.23834e-05
05	Sly02-Seq8-50um		2022-08-30		0.000420156	0.000130566	6.48552e-06	9.65721e-05	0.00200472	0.000137208	-3.68157e-06	0.000142616	-0.000107473	0.000133857	0.000733622	0.000103363	1.58551e-05	0.000105262	9.18637e-05	0.000134502	0.000850574	0.000153559		8.33225			0.000160974	5.23288e-05	0.0454653	0.000109841	1.8873e-05	0.800536	1.73364e-05	0.574111	6.87992					0.707888	5.87337e-05	82.9704	293.929	57				0.70783	5.50786e-05
06	Sly03-Seq8-50um		2022-08-30		0.000411187	0.000103654	-4.52959e-06	0.000100303	0.00200473	0.000133508	5.27934e-06	0.000101844	-0.000114476	0.000119686	0.000735245	0.000101872	1.78395e-06	9.84182e-05	8.99779e-05	9.69028e-05	0.000847163	0.00013188		9.33115			0.000198768	7.51939e-05	0.05089	6.61724e-05	3.44021e-05	0.896235	3.33671e-05	0.642752	7.70482					0.707798	5.56868e-05	78.6762	166.089	58				0.707713	5.7638e-05
07	Sly01-Seq9-50um		2022-08-30		0.000414791	0.000122533	1.71203e-05	0.00011537	0.00199457	0.00013939	4.5419e-06	0.000103956	-0.000106389	0.000148351	0.000736377	0.000116575	5.30038e-06	0.000111141	9.71937e-05	0.000109892	0.000914561	0.00014433		9.23282			0.000187627	5.12966e-05	0.0503567	0.000126295	1.97453e-05	0.886808	2.58657e-05	0.635989	7.62355					0.707792	5.79266e-05	81.8413	157.829	57				0.707737	6.46064e-05
08	Sly02-Seq9-50um		2022-08-30		0.00042035	0.00011537	3.36531e-06	0.000114845	0.00200325	0.000127151	5.92414e-06	0.00010653	-0.000104801	0.000123764	0.000744456	0.000119103	5.16459e-06	0.000129619	9.6936e-05	9.01807e-05	0.000915763	0.000112021		9.38174			0.000185467	6.77962e-05	0.0511607	7.9067e-05	1.37371e-05	0.901026	2.04459e-05	0.646211	7.74652					0.707795	6.37182e-05	90.0235	162.398	60				0.707743	5.87859e-05
09	Sly03-Seq9-50um		2022-08-30		0.000415972	0.000124425	-2.67907e-06	0.0001243	0.00199421	0.000173416	-1.22316e-06	9.43941e-05	-0.000113439	0.000130806	0.00073914	0.000102725	7.10191e-06	0.000146552	9.75191e-05	9.73288e-05	0.000913643	0.000146002		9.39024			0.000191489	6.92907e-05	0.0512281	7.2888e-05	3.61539e-05	0.901892	3.28448e-05	0.646802	7.75353					0.707782	6.04191e-05	85.364	144.601	60				0.707709	6.19018e-05
10	Sly01-Seq1-50um		2022-09-01		0.000441624	0.00010191	3.87785e-06	0.000136256	0.00211441	0.000168124	-5.33417e-06	0.000108349	-0.000104397	0.000112576	0.000674278	0.000119657	6.75568e-06	0.000113018	1.59166e-05	0.000107846	0.000154769	0.000136227		8.54419			0.00016879	6.34226e-05	0.0465092	8.07219e-05	2.42986e-05	0.820254	3.04231e-05	0.588437	7.05563					0.707822	5.41239e-05	76.4654	200.761	58				0.70775	5.7149e-05
11	Sly02-Seq1-50um		2022-09-01		0.000438717	0.00011828	7.49483e-06	0.000122074	0.00209505	0.00016	1.98697e-06	0.000103459	-0.00010025	0.00010528	0.00069283	8.39876e-05	1.44505e-05	9.90237e-05	4.27441e-05	0.000115457	0.000380461	0.000120441		8.47793			0.000169328	5.78545e-05	0.0461313	7.35258e-05	1.63021e-05	0.813829	1.81459e-05	0.583869	7.0007					0.707822	6.57048e-05	92.8268	200.278	57				0.707742	7.03605e-05
12	Sly03-Seq1-50um		2022-09-01		0.000434461	0.000150837	4.28186e-06	9.3054e-05	0.00208294	0.000140715	-1.25066e-06	0.000112644	-9.88487e-05	0.000130358	0.0007151	0.000113054	9.22224e-06	0.000123697	4.9465e-05	0.000106116	0.000520704	0.000158713		8.77385			0.000185229	7.05236e-05	0.0477696	0.000160068	1.42353e-05	0.842229	1.69676e-05	0.604255	7.24493					0.707845	5.66816e-05	80.0762	233.262	59				0.707776	5.56763e-05
13	Sly01-Seq2-50um		2022-09-01		0.000431793	0.000125049	1.11533e-05	9.49146e-05	0.00208296	0.000147918	-9.72168e-06	0.000104323	-0.000108446	0.000121769	0.000704981	0.000106169	-5.26275e-06	0.000122753	4.36139e-05	9.32831e-05	0.000462562	0.000120032		8.68778			0.000185649	6.17592e-05	0.0472916	0.000131569	2.96339e-05	0.8339	3.02086e-05	0.598291	7.17391					0.707833	5.62451e-05	79.461	216.142	58				0.707706	5.7007e-05
14	Sly02-Seq2-50um		2022-09-01		0.000436271	0.000100509	1.43634e-05	0.000126715	0.0020882	0.000171404	2.16628e-06	0.00011261	-9.96665e-05	0.000107774	0.000727742	0.000104098	8.82333e-07	0.000105503	6.23157e-05	0.000139116	0.000605285	0.000140663		9.01802			0.000201111	7.16776e-05	0.0490788	6.62801e-05	1.67037e-05	0.865532	2.65499e-05	0.620973	7.44648					0.707817	5.45357e-05	77.0477	194.262	56				0.707736	5.85244e-05
15	Sly01-Seq5-50um		2022-09-05		0.000402043	0.000126366	1.01597e-05	0.00012865	0.00195282	0.000138493	5.91731e-06	0.000107145	-0.000101753	0.000136712	0.000642148	0.00010814	-1.74671e-06	0.000114996	3.62925e-05	0.000128947	0.000276398	0.000128578		8.86359			0.000219707	9.41407e-05	0.0482369	8.87611e-05	3.2455e-05	0.850268	3.17164e-05	0.61016	7.31927					0.707754	4.08021e-05	57.65	105.18	57				0.707682	4.62809e-05
16	Sly02-Seq5-50um		2022-09-05		0.000403185	0.00011625	9.56853e-06	0.000114657	0.00195715	0.000142758	5.69611e-06	0.000104628	-9.85758e-05	0.000118638	0.000657652	0.000105744	-2.86736e-06	0.000126539	4.38114e-05	0.00012774	0.000393148	0.000164951		8.87703			0.000220696	9.42477e-05	0.0483082	9.96629e-05	3.04955e-05	0.851546	2.96357e-05	0.611093	7.33026					0.707775	4.30501e-05	60.8246	134.123	56				0.707695	4.57603e-05
17	Sly01-Seq6-50um		2022-09-05		0.000401211	0.000119923	8.19528e-06	0.00011713	0.00195037	0.000151906	4.33414e-06	0.000111095	-0.000101829	0.000109554	0.000645976	0.000120758	1.77752e-06	0.000124077	3.79812e-05	0.000118116	0.000291698	0.000121297		8.54761			0.000215666	9.4986e-05	0.0465811	8.21922e-05	4.44087e-05	0.820389	3.04145e-05	0.588606	7.05832					0.707823	4.06268e-05	57.3968	202.548	55				0.707732	5.40925e-05
18	Sly02-Seq6-50um		2022-09-05		0.000406663	0.000122501	1.11522e-05	0.000125759	0.0019615	0.000145847	1.27438e-07	0.000109535	-0.00010212	0.000119734	0.000670992	0.000117055	3.73649e-07	0.000113342	5.78489e-05	0.000112762	0.000491827	0.000187338		8.79569			0.000200178	8.28282e-05	0.0478873	8.55284e-05	3.73089e-05	0.843935	2.63785e-05	0.605565	7.26299					0.707789	4.99689e-05	70.5986	154.696	57				0.707721	5.31571e-05
19	Sly03-Seq6-50um		2022-09-05		0.000403296	0.000117114	1.19542e-05	0.000116918	0.00196457	0.000149753	1.11982e-06	0.000103361	-9.90149e-05	0.000132464	0.000666224	0.000125335	-2.18338e-06	0.000116409	5.76833e-05	0.000123375	0.000509152	0.000187062		8.81465			0.000199366	8.42436e-05	0.0479825	8.53167e-05	2.90745e-05	0.845883	3.36705e-05	0.606899	7.27863					0.707769	5.694e-05	80.45	125.288	58				0.707694	5.6587e-05
																																						Average	0.707817							Average	0.707743
																																						2 s.d.	7.31496e-05							2 s.d.	8.1596e-05
																																						2 s.d. ppm	103.345							2 s.d. ppm	115.29
01	Sly01-Seq4-25um		2022-08-30		0.00044797	0.000134052	1.01906e-05	0.000112399	0.00214616	0.000126782	7.73214e-06	0.000108072	-0.000105608	0.000128382	0.000689901	0.000128547	-2.80307e-07	0.000111158	2.10665e-05	0.000113753	0.0001743	0.000143935		2.42241			4.55326e-05	2.28508e-05	0.0131991	2.3e-05	1.30961e-05	0.232601	6.57312e-06	0.166847	2.00026					0.707792	7.55419e-05	106.729	158.106	56				0.707758	0.000107914
02	Sly02-Seq4-25um		2022-08-30		0.000437308	0.000118729	8.09699e-06	0.00015192	0.0021187	0.00013152	9.50875e-06	0.000107199	-0.000106959	0.000136518	0.000697603	0.000108046	5.40603e-08	0.000125819	3.2129e-05	0.000119324	0.000223437	0.000112153		2.42187			5.45017e-05	3.83592e-06	0.0132225	3.62262e-05	1.38407e-05	0.232566	1.68502e-05	0.166804	1.99976					0.707746	9.37168e-05	132.416	93.1153	56				0.707568	0.00011914
03	Sly03-Seq4-25um		2022-08-30		0.000427828	0.000106036	1.05389e-05	0.000133936	0.0021307	0.000130144	1.6663e-05	0.000113315	-8.6869e-05	0.000149997	0.000688669	0.000127486	1.38232e-05	9.97734e-05	3.21703e-05	0.000112995	0.00024278	0.000139847		2.42219			6.35128e-05	1.44015e-05	0.0132022	2.72908e-05	-5.7292e-06	0.232591	-6.35307e-06	0.166812	2					0.707724	9.15274e-05	129.326	62.763	57				0.707723	0.000113294
04	Sly01-Seq5-25um		2022-08-30		0.000436977	0.000104312	1.1729e-05	0.000145948	0.00211572	0.000146754	7.65973e-06	0.000133413	-0.000105066	0.000129979	0.000691438	0.000125101	1.53832e-06	9.93372e-05	2.23214e-05	0.000117437	0.000243202	0.000118099		2.44525			5.6681e-05	7.12935e-06	0.013356	3.0349e-05	1.44651e-05	0.234794	1.39739e-05	0.168423	2.01904					0.707853	8.48617e-05	119.886	244.837	58				0.707683	0.000108154
05	Sly02-Seq5-25um		2022-08-30		0.000432847	0.000118859	1.74908e-05	0.000129888	0.00212185	0.000177521	1.32502e-05	9.95309e-05	-0.00011118	0.000122852	0.000697343	0.000121261	-1.77065e-06	0.00012303	3.37122e-05	0.000109752	0.000278647	0.000122886		2.45512			7.19728e-05	1.25231e-05	0.013398	2.28772e-05	1.1506e-05	0.235742	7.61512e-06	0.169106	2.02716					0.707876	9.23386e-05	130.445	276.303	57				0.707761	0.000118407
06	Sly03-Seq5-25um		2022-08-30		0.000430856	0.000106858	4.13755e-06	0.000143573	0.00212145	0.00011252	1.2472e-05	0.000130778	-9.90265e-05	0.000106669	0.000704491	0.000110217	2.06206e-06	0.000123986	3.21736e-05	0.000135571	0.000293645	0.000133745		2.55492			4.97955e-05	2.43329e-05	0.0139352	1.7416e-05	6.55284e-06	0.24533	4.03409e-06	0.175962	2.10956					0.707767	8.32764e-05	117.661	123.54	56				0.707687	0.000106883
07	Sly01-Seq6-25um		2022-08-30		0.000424097	0.000131118	5.38697e-06	0.000146974	0.0021003	0.000120932	1.191e-05	0.000117914	-9.5178e-05	0.000151618	0.000701637	0.000118399	2.82186e-06	0.000104521	1.68849e-05	0.000119656	0.000275647	0.000122405		2.40714			5.90427e-05	3.09648e-05	0.0131509	6.5573e-06	-7.13824e-06	0.231164	8.89476e-06	0.165814	1.98754					0.70786	0.000109148	154.194	253.856	59				0.707802	0.000145676
08	Sly02-Seq6-25um		2022-08-30		0.000418886	0.000122889	2.31398e-06	0.000137587	0.0020994	0.000141012	9.63333e-06	0.000102535	-0.000117021	0.000145715	0.000686786	0.000113708	5.52793e-06	0.000113015	2.80184e-05	0.000123603	0.000281379	0.000126371		2.58371			7.89356e-05	3.09931e-05	0.0141005	2.05689e-05	1.90907e-05	0.248114	1.33751e-05	0.177948	2.13335					0.707762	0.000102749	145.174	116.067	58				0.70769	0.00010351
09	Sly03-Seq6-25um		2022-08-30		0.000442105	9.85404e-05	9.20305e-06	0.000115367	0.00210998	0.000123957	1.30572e-05	0.000120164	-0.000116331	0.000122659	0.000696292	0.000137946	9.83965e-06	0.000104292	2.97969e-05	0.000114775	0.000307385	0.000119992		2.35581			5.64984e-05	7.56228e-06	0.0128611	1.85373e-05	1.10919e-05	0.226243	6.70879e-06	0.162295	1.94512					0.707941	8.48562e-05	119.863	369.114	56				0.707844	0.000113343
10	Sly01-Seq2-25um		2022-09-05		0.000433035	0.000120766	3.83398e-06	0.000117875	0.00209873	0.000151701	-6.51101e-07	0.000107027	-9.60641e-05	0.000130231	0.000678401	0.000109653	9.36604e-06	0.000117868	2.68049e-05	0.000116895	0.000231393	0.000128491		2.44546			5.0986e-05	2.524e-05	0.013291	8.81744e-05	1.80298e-05	0.234511	6.06922e-06	0.168331	2.01923					0.707828	9.27435e-05	131.026	208.68	56				0.707691	0.000121803
11	Sly02-Seq2-25um		2022-09-05		0.000429903	0.000115585	9.30542e-06	0.000127683	0.00207382	0.000131655	-4.072e-06	0.000117851	-9.14987e-05	0.000116712	0.000675444	9.83346e-05	1.33654e-05	0.000123979	2.54108e-05	0.000107172	0.00020632	0.000133423		2.47969			6.48754e-05	2.58608e-05	0.0135039	1.74507e-05	1.47372e-05	0.237794	1.9286e-06	0.170663	2.04752					0.707754	7.96349e-05	112.518	104.564	59				0.70772	0.000103431
12	Sly03-Seq2-25um		2022-09-05		0.00042588	0.00012172	7.574e-06	0.000113054	0.00206895	0.000129094	2.96687e-06	0.000121882	-9.66834e-05	0.000117598	0.000665193	0.000115746	1.08595e-05	0.000116633	1.80629e-05	0.000124452	0.000198988	0.000133197		2.47367			6.38498e-05	2.3102e-05	0.0134809	2.25257e-05	1.33901e-05	0.237226	6.17715e-07	0.170274	2.04256					0.707829	9.27547e-05	131.041	210.768	57				0.707847	0.000128693
13	Sly01-Seq3-25um		2022-09-05		0.000420501	0.000118673	6.26408e-06	0.000105217	0.00207183	0.000135456	-1.10794e-06	0.000143503	-8.70258e-05	0.000118932	0.000667098	0.000116363	1.37172e-05	0.000115627	1.82155e-05	9.71973e-05	0.000185824	0.000122427		2.46796			6.09567e-05	2.27639e-05	0.0134427	1.77821e-05	5.27693e-06	0.236669	8.61959e-07	0.169875	2.03786					0.707853	8.36595e-05	118.188	243.858	58				0.707821	0.00011065
14	Sly02-Seq3-25um		2022-09-05		0.000422535	0.000127668	6.13737e-06	0.000121378	0.0020713	0.000133877	-5.10201e-06	0.000111905	-8.84001e-05	0.000130438	0.000667768	0.000111844	4.59381e-06	0.000105396	1.71287e-05	0.00012491	0.000193087	0.000147534		2.43306			6.01546e-05	2.23153e-05	0.0132518	3.54454e-05	8.53559e-06	0.233373	1.22418e-05	0.167489	2.00902					0.707799	9.40059e-05	132.814	168.482	57				0.707653	0.000108507
15	Sly03-Seq3-25um		2022-09-05		0.000424357	0.000123778	9.01093e-06	0.000127104	0.00206136	0.000135074	-9.8877e-06	0.000103742	-9.01064e-05	0.000120306	0.000670186	0.000113637	1.72339e-06	0.000113565	1.82964e-05	0.000104858	0.000195441	0.000111637		2.28661			5.51423e-05	2.66774e-05	0.0124751	3.28995e-05	1.86108e-05	0.21939	1.23488e-05	0.157427	1.88808					0.707802	8.89826e-05	125.717	171.892	58				0.707641	0.000106251
16	Sly01-Seq4-25um		2022-09-05		0.000423974	0.000114936	4.42014e-06	0.00012978	0.00206416	0.00014731	-5.21493e-06	0.000119313	-8.63611e-05	0.000129091	0.000667163	0.000120686	6.50332e-06	0.000113156	1.52919e-05	0.000125804	0.000201743	0.000133051		2.39761			7.33916e-05	2.17456e-05	0.0130703	1.77388e-05	9.29123e-06	0.230003	1.38616e-05	0.165033	1.97974					0.707753	8.90495e-05	125.82	103.506	57				0.70762	0.0001195
17	Sly02-Seq4-25um		2022-09-05		0.000420009	0.000142719	1.01732e-05	0.000137472	0.00206681	0.00015031	7.20332e-08	0.000125501	-9.28582e-05	0.00012022	0.000668436	0.000109708	6.35168e-06	0.000125547	1.19595e-05	0.000114306	0.000195265	0.000122675		2.4097			5.70849e-05	2.17495e-05	0.0131346	1.51763e-05	9.52853e-06	0.231136	1.06426e-05	0.165856	1.98974					0.707684	9.17724e-05	129.68	5.48055	56				0.707577	0.000122365
18	Sly03-Seq4-25um		2022-09-05		0.000425043	0.000106813	7.58498e-06	0.000118852	0.00205582	0.000149786	-3.9577e-06	0.000102498	-9.71671e-05	0.000128642	0.000667273	0.000113962	7.45479e-06	0.000128451	1.72045e-05	0.000108541	0.000199504	0.000135217		2.39576			6.32673e-05	2.76156e-05	0.0130645	2.65347e-05	1.36663e-05	0.229808	8.53224e-06	0.164918	1.97822					0.707792	8.44272e-05	119.283	157.679	55				0.707634	0.0001135
19	Sly01-Seq5-25um		2022-09-06		0.000406337	0.000118298	1.04011e-05	0.000130506	0.00197245	0.000132105	9.19504e-06	0.000119894	-9.83172e-05	0.000135151	0.000637769	0.000117667	-1.61837e-06	0.00011425	1.74731e-05	0.000130179	0.000136197	0.000117118		2.34614			4.97133e-05	2.06296e-05	0.0127765	2.60462e-05	5.98864e-06	0.225176	1.96088e-06	0.161544	1.93731					0.707739	0.000103654	146.457	83.3826	59				0.707706	0.000107263
20	Sly02-Seq5-25um		2022-09-06		0.00041062	0.000110711	5.40466e-06	0.00012275	0.00195905	0.000135665	6.79559e-06	0.000111191	-9.85487e-05	0.000101628	0.000633794	0.000118118	-5.86909e-06	0.000102678	2.14188e-05	0.00012779	0.000156314	0.000130465		2.31414			5.18847e-05	2.68764e-05	0.0126049	3.56953e-05	1.39147e-05	0.222051	1.86051e-05	0.159329	1.91086					0.707776	9.33036e-05	131.826	135.717	57				0.707589	0.000123944
21	Sly03-Seq5-25um		2022-09-06		0.000406622	0.000115293	7.3976e-06	0.000117943	0.00196588	0.00013094	1.15271e-05	0.000117693	-9.63258e-05	0.000125569	0.000637293	0.00010101	-2.19584e-07	0.000113788	1.98287e-05	0.00012717	0.000171026	0.000117787		2.30044			5.2445e-05	2.07375e-05	0.0125276	1.4243e-05	2.20589e-06	0.220798	6.54951e-07	0.158407	1.89953					0.7078	0.000108465	153.242	168.988	59				0.707815	0.000130202
																																						Average	0.707797							Average	0.707706
																																						2 s.d.	0.00011793							2 s.d.	0.000173114
																																						2 s.d. ppm	166.616							2 s.d. ppm	244.613
01	Sly01-Seq1-13um		2022-08-30		0.000454421	0.000111562	1.22011e-05	0.000141035	0.00221686	0.00013945	-3.27386e-06	0.000119348	-0.000102288	0.000138299	0.000711109	0.0001154	1.75184e-05	0.000117104	1.22111e-05	0.000127132	0.000109574	9.6293e-05		0.57541			1.99257e-05	6.37551e-06	0.00315205	1.69135e-05	1.73811e-05	0.0552222	-4.46076e-06	0.0396092	0.475062					0.707804	0.000241429	341.095	175.59	57				0.707698	0.000391316
02	Sly02-Seq1-13um		2022-08-30		0.000457269	0.000134535	1.33076e-05	0.000130126	0.00221908	0.000141884	-5.69612e-07	0.000110435	-9.83126e-05	0.000132794	0.000712844	0.000117952	1.05422e-05	0.00013399	1.18413e-05	0.000138952	0.000114797	0.000127169		0.595443			2.35905e-05	-7.70079e-06	0.00326327	1.28019e-05	-3.53284e-06	0.0571453	-4.3274e-06	0.0410099	0.491599					0.70799	0.000255862	361.392	438.648	56				0.708005	0.000370213
03	Sly03-Seq1-13um		2022-08-30		0.000460309	0.000127581	6.60847e-06	0.00012141	0.00225111	0.000141696	4.73338e-06	0.000120701	-0.000100982	0.00012702	0.000728942	9.99043e-05	-4.51098e-06	8.95538e-05	2.15566e-05	0.000106191	0.000113423	0.000112595		0.573955			1.84959e-05	7.25186e-06	0.00312769	4.06187e-06	7.29481e-06	0.0550807	1.36303e-05	0.0395017	0.473861					0.707625	0.000251204	354.996	-77.2507	56				0.707101	0.000357157
04	Sly01-Seq2-13um		2022-08-30		0.000465541	0.000107108	1.53005e-05	0.000121552	0.002253	0.00011463	-1.25946e-06	8.82497e-05	-8.47872e-05	0.000143793	0.000721486	0.000113148	6.07095e-06	0.000145861	1.06455e-05	0.000120708	0.000125416	0.000102462		0.595325			4.0577e-06	-5.23299e-06	0.00324462	1.87661e-05	-9.76411e-06	0.0571309	1.01996e-05	0.0409905	0.491494					0.707878	0.00026091	368.58	280.345	57				0.707439	0.000339184
05	Sly02-Seq2-13um		2022-08-30		0.000463252	0.000138373	8.55087e-06	0.000116458	0.00225341	0.000109401	8.22256e-06	9.51601e-05	-8.57588e-05	0.000144621	0.000720186	0.000145456	3.07474e-06	0.000113596	1.60497e-05	0.000148944	0.000126644	0.000111487		0.57718			1.04018e-05	2.95477e-06	0.00314764	3.66225e-06	4.3676e-07	0.0553995	5.30913e-06	0.0397424	0.476506					0.707749	0.000238586	337.105	97.1202	58				0.707581	0.000404529
06	Sly03-Seq2-13um		2022-08-30		0.000461594	0.000135054	4.93072e-06	0.000118214	0.00227088	0.000143846	8.65187e-06	0.000107018	-9.42397e-05	0.000124274	0.000728551	0.000107556	8.94214e-06	0.000121169	1.75202e-05	0.00012602	0.000127748	0.000139662		0.578578			1.98331e-05	8.99069e-06	0.00314969	4.829e-06	5.27956e-06	0.0555221	-4.10969e-06	0.0398235	0.477662					0.707659	0.000270199	381.82	-29.2739	57				0.707706	0.000502648
07	Sly01-Seq3-13um		2022-08-30		0.000459937	0.00011824	1.17815e-05	0.000124868	0.00224362	0.000145114	-5.00121e-07	0.00012158	-0.000102937	0.000115195	0.000721844	0.000109222	4.81946e-06	0.000106173	1.06957e-05	0.000117495	0.000128635	0.000129424		0.600444			1.66597e-05	4.0477e-06	0.00326821	3.43222e-06	4.84906e-06	0.0576189	7.03855e-06	0.0413425	0.495723					0.707899	0.000246579	348.325	309.021	58				0.707617	0.000381336
08	Sly02-Seq3-13um		2022-08-30		0.000467172	0.000102491	1.13621e-05	0.00012729	0.00223318	0.000135112	8.13696e-06	0.000118231	-9.55309e-05	0.000146133	0.00071513	0.000117373	-5.29757e-06	9.39407e-05	2.05449e-05	0.000136251	0.000121671	0.000123929		0.58823			1.10604e-05	-8.2803e-06	0.00321065	-9.55251e-07	-3.47994e-06	0.0564537	1.84002e-05	0.0404938	0.485636					0.707719	0.000174384	246.403	54.5399	57				0.707124	0.000335158
09	Sly03-Seq3-13um		2022-08-30		0.000461771	0.000119289	1.50358e-05	0.000123888	0.00223464	0.000127439	8.37573e-06	0.000102369	-0.000101047	0.000130913	0.000718782	9.65871e-05	1.14561e-05	0.000134416	1.19e-05	0.00010122	0.000134545	0.000125651		0.585594			1.31615e-05	9.69018e-06	0.00318303	1.0921e-06	1.73627e-05	0.0562129	-3.10611e-06	0.0403306	0.483446					0.707993	0.000355314	501.86	442.632	57				0.708071	0.000381099
10	Sly01-Seq1-13um		2022-09-02		0.000429856	0.000127225	7.70566e-06	0.000106687	0.00210238	0.00013606	4.98562e-06	0.000128759	-9.95085e-05	0.000135378	0.000670809	0.000124985	1.03125e-05	0.000106594	1.25791e-05	0.00011667	5.70795e-05	0.000126725		0.545806			1.81019e-05	1.33581e-05	0.00297614	5.38106e-06	1.2079e-05	0.052373	-9.01366e-06	0.0375597	0.450671					0.707387	0.000214729	303.553	-414.45	58				0.70762	0.000353353
11	Sly02-Seq1-13um		2022-09-02		0.000434308	0.000116901	8.96813e-06	0.00012417	0.00210079	0.000127233	-7.72563e-06	0.000116274	-9.44098e-05	0.000122934	0.00067022	0.000111559	3.43304e-06	0.000125756	1.33948e-05	0.000111034	5.84912e-05	0.000122961		0.527216			8.83581e-06	2.76222e-06	0.00287405	1.17708e-05	-8.10033e-07	0.0505742	-4.542e-06	0.0362909	0.435317					0.707694	0.000217584	307.454	20.2767	56				0.707793	0.000434314
12	Sly03-Seq1-13um		2022-09-02		0.000425394	0.000113386	9.49363e-06	0.000121914	0.00211288	0.000143484	2.19787e-06	0.000102609	-9.75825e-05	0.000111431	0.000670425	0.000112886	-1.77682e-06	0.000121859	8.19327e-06	0.00011693	6.58883e-05	0.000133807		0.518965			1.54218e-05	3.0486e-06	0.00281821	-1.50492e-07	1.15903e-07	0.0497832	1.07674e-06	0.035729	0.428495					0.707897	0.000224379	316.965	306.818	59				0.707817	0.000336542
13	Sly01-Seq2-13um		2022-09-02		0.000430073	0.00011119	1.09166e-05	0.000126854	0.00210062	0.000147236	-9.77374e-07	0.000115153	-9.49272e-05	0.000123851	0.000671905	0.000105908	1.73345e-06	0.00011761	1.48511e-05	0.000129472	6.79177e-05	0.000117106		0.528314			2.15274e-05	-2.68129e-06	0.00287886	1.13926e-05	-2.47818e-06	0.0506876	2.74363e-06	0.0363742	0.436212					0.707908	0.000211632	298.954	322.513	57				0.707586	0.000364476
14	Sly02-Seq2-13um		2022-09-02		0.000429832	0.000121774	6.60821e-06	0.000122106	0.00209792	0.000126649	-8.66705e-08	0.000112011	-9.6362e-05	0.000117054	0.00066896	0.000111824	3.35485e-07	0.000106163	7.98812e-06	0.000119059	6.60134e-05	0.000120411		0.537373			1.35325e-05	2.82734e-06	0.00292835	5.64362e-06	2.28743e-06	0.0515741	6.72531e-06	0.037008	0.443695					0.707855	0.000291342	411.584	247.058	59				0.707566	0.000462814
15	Sly03-Seq2-13um		2022-09-02		0.000428357	0.000125081	6.90361e-06	0.000115459	0.00210051	0.000142688	-5.89904e-06	0.000117377	-9.43063e-05	0.00010776	0.000670101	0.000115894	1.44666e-06	0.000122735	1.4408e-05	0.000119087	7.3143e-05	0.000113624		0.555628			2.12256e-05	8.52174e-06	0.00302414	1.486e-05	7.10132e-06	0.0533106	-2.67479e-06	0.0382486	0.458765					0.707711	0.000244208	345.067	43.793	57				0.707674	0.000335854
16	Sly01-Seq1-13um		2022-09-06		0.000414084	0.000126099	1.45867e-05	0.00012139	0.00201715	0.000154537	-7.39769e-06	0.000110353	-9.31522e-05	0.000114592	0.00063229	0.000114518	7.43965e-06	0.000110209	1.51618e-05	0.000114335	6.15292e-05	0.000102905		0.578234			8.3478e-06	9.29313e-06	0.00314113	3.28789e-06	-3.62815e-06	0.0554796	1.29251e-06	0.039803	0.477442					0.707739	0.000232382	328.344	83.7916	57				0.707473	0.000368511
17	Sly02-Seq1-13um		2022-09-06		0.000409538	0.000118519	8.50469e-06	0.000127991	0.00201142	0.000135312	6.96112e-07	0.000114138	-9.35449e-05	0.000135024	0.000632656	0.000124336	5.89009e-06	0.000114615	1.29246e-05	0.000119878	7.68928e-05	0.000119531		0.600245			1.23458e-05	7.96602e-06	0.00326705	6.52135e-06	7.53108e-06	0.0575847	6.69506e-06	0.0413246	0.495603					0.707879	0.000230132	325.101	280.821	58				0.707548	0.000360768
18	Sly03-Seq1-13um		2022-09-06		0.000406914	0.000128816	2.12188e-06	0.000106245	0.00200277	0.000118424	9.99128e-06	0.000128174	-9.35705e-05	0.000138109	0.000632242	0.000134198	2.67551e-06	0.000113016	1.35561e-05	0.000126181	7.54635e-05	0.000125564		0.549855			2.12825e-05	5.35535e-06	0.00299764	1.1151e-06	1.01374e-05	0.0527587	4.38322e-06	0.0378559	0.453994					0.707722	0.000260999	368.788	59.1359	57				0.707788	0.000337123
19	Sly01-Seq2-13um		2022-09-06		0.000413737	0.000119491	1.60275e-05	0.000122897	0.00201342	0.000148318	7.15841e-06	0.000103605	-9.37237e-05	0.000131451	0.000631156	0.000106267	5.96404e-06	0.00011619	1.0146e-05	0.000130951	7.70857e-05	0.000118112		0.53481			1.21469e-05	5.60531e-07	0.00291113	5.54298e-07	-1.352e-05	0.0513173	1.51902e-06	0.0368257	0.44157					0.707794	0.000246572	348.368	160.83	57				0.707601	0.000355757
20	Sly02-Seq2-13um		2022-09-06		0.000414295	0.000107439	1.74306e-05	0.000129097	0.00200419	0.000137571	8.79703e-06	0.000134744	-0.000107077	0.000123576	0.00062779	0.000119689	1.4007e-05	0.000127745	9.69399e-06	0.000116559	8.22759e-05	0.000128087		0.515817			1.07471e-05	-5.64707e-06	0.00280998	1.3896e-06	1.55356e-05	0.0495033	-1.74263e-08	0.0355123	0.425877					0.707646	0.000221426	312.905	-48.6291	58				0.707704	0.000447547
21	Sly03-Seq2-13um		2022-09-06		0.000411879	0.000130954	1.07604e-05	0.000126593	0.00199741	0.000146617	6.12161e-06	0.000120003	-0.00010183	0.000129502	0.000630562	0.000108039	1.0879e-05	0.000114366	1.36881e-05	0.000115754	7.79874e-05	0.000121278		0.524534			-8.28875e-07	4.489e-06	0.00284448	9.26648e-06	7.14555e-06	0.0503205	-2.85665e-07	0.0361097	0.433082					0.707878	0.000227046	320.741	280.493	56				0.707703	0.000393481
																																						Average	0.707782							Average	0.707629
																																						2 s.d.	0.000283738							2 s.d.	0.000459991
																																						2 s.d. ppm	400.883							2 s.d. ppm	650.046
01	Sly01-Seq3-10um		2022-09-06		0.000414701	0.000117721	4.61595e-06	0.000133481	0.00198843	0.000148125	5.1359e-07	0.000115292	-9.07673e-05	0.000137414	0.000627984	0.000120244	2.0565e-06	0.000116242	1.01695e-05	0.000116929	5.95889e-05	0.000121739		0.274558			-2.50401e-06	3.53309e-06	0.00147737	7.98572e-06	-3.90753e-07	0.0263419	-2.40129e-06	0.0189059	0.22667					0.708037	0.000511921	723.014	504.976	56				0.707814	0.000951376
02	Sly02-Seq3-10um		2022-09-06		0.000408165	0.000136028	9.17586e-06	0.000120435	0.00197336	0.00014821	3.88905e-06	0.00013179	-8.99737e-05	0.000119284	0.000627017	0.00011055	2.59262e-06	0.000106096	8.87228e-06	0.000116314	6.68506e-05	0.00012043		0.278379			6.66056e-06	-4.38029e-07	0.00151929	6.991e-06	-5.04266e-06	0.0267079	-3.21062e-06	0.0191706	0.229821					0.708154	0.000522205	737.417	669.526	57				0.70803	0.00086953
03	Sly03-Seq3-10um		2022-09-06		0.000406899	0.000121098	1.30846e-05	0.000124217	0.00198	0.000131635	8.04687e-06	0.000121834	-8.96539e-05	0.000111481	0.000620744	0.000120367	6.92718e-06	0.00011981	8.75586e-06	0.000114209	7.09197e-05	0.000129752		0.279032			4.28838e-06	7.15546e-06	0.00152756	-2.39265e-06	-1.63122e-06	0.0267863	5.33887e-06	0.0192056	0.230353					0.707665	0.000458399	647.763	-21.0348	57				0.706567	0.000806484
04	Sly01-Seq4-10um		2022-09-06		0.000404361	0.000118045	5.26814e-06	0.000115812	0.00197407	0.000144596	1.42228e-06	0.000121486	-9.65199e-05	0.000131893	0.000620229	0.000112667	8.62848e-06	0.000110189	7.04453e-06	0.000125713	7.44479e-05	0.000107297		0.284336			7.37574e-06	3.07947e-06	0.00154426	4.91948e-06	5.33363e-06	0.0272784	3.47945e-06	0.0195844	0.234732					0.708075	0.000397378	561.208	558.607	57				0.707308	0.000823559
05	Sly02-Seq4-10um		2022-09-06		0.000408094	0.000114109	1.27315e-05	0.000121754	0.00197484	0.000138178	8.71266e-06	0.000112632	-9.43756e-05	0.000113976	0.00062342	0.000121779	1.64648e-06	0.000120611	1.56542e-05	0.000122977	6.83456e-05	0.000119488		0.274938			1.36269e-05	1.26114e-06	0.00149839	1.88062e-07	-6.40369e-06	0.0263811	6.94982e-06	0.0189193	0.226974					0.707392	0.000471803	666.961	-406.461	56				0.706307	0.000702447
06	Sly03-Seq4-10um		2022-09-06		0.000405218	0.000135756	8.47976e-06	0.000117729	0.00197832	0.000122146	-1.71935e-06	0.00010426	-9.3004e-05	0.000121734	0.000625851	0.000121041	1.54998e-06	0.000128246	8.88411e-06	0.000115606	6.73851e-05	0.000119707		0.277528			1.4405e-05	2.90396e-06	0.00151043	-5.80964e-07	-1.61685e-08	0.0266252	4.81675e-06	0.0190991	0.229116					0.707785	0.000495498	700.068	148.583	58				0.707066	0.000831022
07	Sly01-Seq6-10um		2022-09-06		0.000411964	0.000132786	7.56139e-06	0.000119457	0.0020001	0.000132791	-6.4944e-06	0.000120108	-9.42752e-05	0.000119692	0.000627704	0.000121973	-4.64513e-06	0.00013126	1.08442e-05	0.000112928	8.55907e-05	0.000116643		0.281288			1.1267e-05	4.50248e-06	0.00152354	1.33748e-05	-6.6549e-08	0.026999	-9.5835e-07	0.0193663	0.232205					0.707798	0.000442887	625.726	166.623	56				0.707386	0.000655038
08	Sly02-Seq6-10um		2022-09-06		0.000414629	0.00011319	5.49683e-06	0.000114845	0.0019846	0.000119748	-1.43737e-06	0.000111511	-9.35349e-05	0.000132013	0.000624059	0.000103534	1.71352e-06	0.000105539	8.77594e-06	9.6131e-05	8.51401e-05	0.000107913		0.2854			1.24399e-05	6.07674e-06	0.00154958	2.16365e-05	5.19433e-06	0.0274059	4.03044e-06	0.0196583	0.235596					0.70778	0.000390214	551.32	141.55	56				0.707249	0.00068441
09	Sly03-Seq6-10um		2022-09-06		0.000413234	0.000127975	1.321e-05	0.000110447	0.00198761	0.000141468	-2.85875e-06	0.000107386	-9.51058e-05	0.000135599	0.00062458	0.000110006	-1.21807e-06	0.000109776	7.51149e-06	0.000110421	8.19415e-05	0.000108753		0.272495			1.34063e-05	-5.63554e-06	0.00149076	6.55649e-06	-2.78923e-06	0.0261488	-2.73876e-07	0.0187642	0.224948					0.708049	0.000520073	734.515	521.815	57				0.707778	0.000930175
10	Sly01-Seq1-10um		2022-09-07		0.000422794	0.000108367	1.20963e-05	0.000140837	0.00205852	0.000127641	1.39732e-05	0.000127318	-9.42259e-05	0.000121905	0.000650887	9.74738e-05	8.0407e-06	9.70553e-05	2.19525e-05	0.000120591	6.00629e-05	0.000132522		0.25423			6.96363e-06	-3.43324e-06	0.0013686	5.16787e-06	8.68054e-08	0.0243686	-2.74832e-06	0.0174859	0.209884					0.707699	0.000442551	625.338	26.1587	56				0.707651	0.000853341
11	Sly02-Seq1-10um		2022-09-07		0.00041858	0.000114794	1.31233e-05	0.000122722	0.0020465	0.000134497	1.63445e-05	0.000115205	-0.000102731	0.000140674	0.00064405	0.000113037	1.30215e-06	0.00011621	1.77118e-05	0.000127475	6.13611e-05	0.000127972		0.260509			1.43251e-05	3.74449e-06	0.00140899	2.60885e-06	1.24192e-05	0.0249807	4.03469e-06	0.0179265	0.215068					0.707934	0.000482159	681.079	358.662	56				0.707278	0.00075102
12	Sly03-Seq1-10um		2022-09-07		0.000418174	0.000126754	1.00951e-05	0.000120062	0.00204181	0.000147493	1.32988e-05	0.000118286	-8.35074e-05	0.000138315	0.000642562	0.000111121	3.73556e-07	0.000116301	1.48254e-05	0.000126505	5.73655e-05	0.000123856		0.243311			1.24097e-05	3.66504e-07	0.00131172	5.78508e-06	-1.45633e-05	0.0233388	1.608e-07	0.0167559	0.200869					0.708245	0.000585617	826.857	797.968	56				0.70784	0.00107088
13	Sly01-Seq2-10um		2022-09-07		0.000411818	0.000120703	8.89519e-06	0.000113651	0.0020397	0.000148098	1.43227e-05	9.30584e-05	-8.80842e-05	0.000129916	0.00064664	0.0001111	1.5062e-06	0.000115787	2.23236e-05	0.000136011	6.38047e-05	0.000114384		0.247302			1.34462e-05	4.1418e-06	0.00134692	1.48278e-06	4.6117e-06	0.0237064	9.98385e-06	0.0170175	0.204154					0.707816	0.000529573	748.178	192.65	58				0.707029	0.00089776
14	Sly02-Seq2-10um		2022-09-07		0.000417444	0.00012754	7.7272e-06	0.000118439	0.00204162	0.000146154	9.63937e-06	0.000116334	-8.56443e-05	0.000132302	0.00064478	0.000103948	6.16397e-06	0.000113871	1.2799e-05	0.00010994	5.93314e-05	0.000117237		0.256234			1.58078e-05	-2.92677e-06	0.00139136	3.05144e-06	2.60685e-06	0.0245812	-1.37883e-06	0.0176365	0.211538					0.707807	0.000476914	673.791	180.157	58				0.708011	0.00111474
15	Sly03-Seq2-10um		2022-09-07		0.000421073	0.000123272	5.73603e-06	0.000107908	0.00203474	0.000128953	9.75589e-06	0.000113709	-9.07256e-05	0.000122974	0.000639487	9.62847e-05	1.04856e-05	0.000114702	2.42609e-05	0.000126748	6.41514e-05	0.000125112		0.248738			8.3395e-06	1.31525e-05	0.00135055	8.54674e-06	3.712e-06	0.0238669	-5.28232e-06	0.0171209	0.205341					0.707551	0.000504283	712.716	-182.588	56				0.708078	0.00105529
16	Sly01-Seq3-10um		2022-09-07		0.000419576	0.000106474	8.07827e-06	0.000122849	0.00203956	0.000150135	4.71746e-06	0.00010994	-8.71471e-05	0.000133925	0.000648077	0.000121843	1.41551e-06	0.000115678	1.51349e-05	0.000108612	6.35256e-05	0.000110011		0.250732			3.33411e-06	9.11534e-06	0.00137258	1.56973e-05	-8.53323e-09	0.0240415	5.17271e-06	0.0172643	0.206994					0.708235	0.000517715	730.994	783.959	55				0.707369	0.00106564
17	Sly02-Seq3-10um		2022-09-07		0.000416863	0.000114537	6.70197e-06	0.00012096	0.00203851	0.000150922	3.71364e-06	0.000125845	-8.79024e-05	0.000134698	0.000637642	0.000104307	6.00505e-09	0.000126817	1.72609e-05	0.000120509	6.3325e-05	0.000121702		0.255227			1.67852e-05	1.013e-05	0.00139198	9.03437e-06	3.30829e-08	0.0244736	2.83912e-06	0.0175588	0.210702					0.707478	0.000591867	836.587	-285.095	56				0.707345	0.000835215
18	Sly03-Seq3-10um		2022-09-07		0.000418828	0.000117519	1.06663e-05	0.000126159	0.00204792	0.000138918	3.21043e-06	0.000119964	-8.88762e-05	0.000119159	0.000642577	0.000117193	4.74057e-06	0.000119045	1.18254e-05	0.000112725	6.30432e-05	0.000133301		0.269423			8.87248e-06	5.40781e-06	0.00145524	8.78479e-06	1.06386e-06	0.0258432	5.5984e-06	0.0185525	0.222424					0.708013	0.000453129	640	470.866	57				0.707105	0.000889826
19	Sly01-Seq4-10um		2022-09-07		0.000417472	0.000123949	7.41484e-06	0.000116554	0.00204039	0.000143072	3.94605e-06	0.000121061	-9.72059e-05	0.00011989	0.00065399	0.000114486	1.00804e-05	0.000109861	1.74701e-05	0.000122579	6.30606e-05	0.00011328		0.270201			1.19552e-05	6.29345e-06	0.00146547	1.34805e-05	7.06758e-06	0.0259068	-8.23738e-06	0.0186037	0.22307					0.708153	0.000358685	506.508	667.936	56				0.708524	0.000829151
20	Sly02-Seq4-10um		2022-09-07		0.000420793	0.000126744	9.08866e-06	0.000122191	0.00204589	0.000143807	-1.34814e-06	0.000116152	-8.90648e-05	0.000120126	0.000651713	0.000114495	3.39095e-06	0.000111414	1.52377e-05	0.000123397	6.67155e-05	0.000121202		0.255483			8.9831e-06	5.74237e-06	0.00138976	-2.56022e-06	-3.76817e-08	0.0245014	6.96412e-06	0.0175826	0.21091					0.708001	0.000466477	658.864	454.271	56				0.707053	0.00091197
21	Sly03-Seq4-10um		2022-09-07		0.000419427	0.000117717	1.13039e-05	0.000127574	0.00204321	0.000157193	-1.64344e-06	0.000117575	-8.93798e-05	0.000116867	0.00064916	0.000121139	4.05455e-06	0.000124405	1.77452e-05	0.00011621	7.05231e-05	0.000117364		0.268188			3.71496e-06	9.91049e-06	0.00145654	1.11532e-05	4.20662e-07	0.025704	-1.54673e-06	0.0184543	0.221398					0.708079	0.000355188	501.622	563.171	54				0.707422	0.00089375
																																						Average	0.707893							Average	0.707439
																																						2 s.d.	0.00048845							2 s.d.	0.00104203
																																						2 s.d. ppm	690.006							2 s.d. ppm	1472.97
01	Sume01-Seq7-50um		2022-08-30		0.000417051	0.000171777	1.46556e-05	0.000157543	0.00200782	0.000232428	-2.0468e-05	0.000115961	-0.000110296	0.000182186	0.00067106	0.000112603	-7.0245e-06	0.000121415	3.10018e-05	0.000167808	0.000347237	0.000191992		5.61449			0.00074365	0.000426965	0.0317247	0.00029974	0.000121578	0.539443	0.000123795	0.386787	4.6361					0.70775	5.71068e-05	80.6878	711.751	60				0.707326	6.36662e-05
02	Sume02-Seq7-50um		2022-08-30		0.000410521	0.00017698	5.705e-06	0.00015813	0.00200214	0.000224566	2.34644e-06	0.000146336	-0.000109813	0.000190389	0.000677828	0.000176266	1.2291e-06	0.000175612	5.09046e-05	0.000152615	0.000452197	0.000177779		5.60692			0.00071409	0.000414864	0.0316683	0.000252934	0.000118609	0.538791	0.000115463	0.386252	4.62974					0.707691	5.20206e-05	73.5075	628.406	57				0.707301	6.56658e-05
03	Sume03-Seq7-50um		2022-08-30		0.000419281	0.000188924	8.77828e-07	0.000192595	0.00199802	0.000206915	-6.70473e-06	0.000169355	-0.000106225	0.000174684	0.000695255	0.000146973	1.44449e-06	0.000178796	5.59877e-05	0.000137124	0.000499016	0.000175768		5.57317			0.000678726	0.000401323	0.0314413	0.000245802	0.000110541	0.535497	0.000104294	0.3839	4.60182					0.707667	6.54936e-05	92.5486	594.33	58				0.707333	7.2971e-05
04	Sume01-Seq8-50um		2022-08-30		0.000412212	0.000171332	3.14136e-06	0.000161837	0.00200037	0.000179656	-1.3349e-05	0.000154758	-9.37837e-05	0.000147144	0.000710707	0.000118491	2.06639e-06	0.000124328	6.61678e-05	0.000129669	0.000580736	0.000175421		6.08019			0.000701065	0.000399391	0.0342442	0.000265068	9.80645e-05	0.583982	0.000104518	0.418664	5.02044					0.707528	6.27775e-05	88.7279	397.541	59				0.707219	6.91188e-05
05	Sume03-Seq8-50um		2022-08-30		0.000408179	0.000162477	1.12452e-05	0.000215048	0.00200666	0.000179473	4.34146e-07	0.000170875	-0.000108125	0.000134186	0.000704493	0.000150517	5.61002e-06	0.000173348	6.10463e-05	0.000188617	0.000615213	0.000164938		5.50087			0.00057225	0.000322729	0.0309287	0.000219895	0.000104371	0.528539	8.08861e-05	0.378943	4.54201					0.707735	8.11711e-05	114.691	690.361	59				0.70744	8.82636e-05
06	Sume02-Seq8-50um		2022-08-30		0.000405512	0.000205234	7.63102e-06	0.000176086	0.00200267	0.000132999	8.80255e-06	0.000137802	-0.000108594	0.000190437	0.000696635	0.000151954	-7.24092e-08	0.000138021	6.61129e-05	0.000110206	0.000602923	0.000158915		6.48046			0.000709005	0.000396831	0.0364333	0.000257456	0.000111713	0.622367	0.000102709	0.44623	5.35096					0.707578	6.31697e-05	89.2759	468.18	58				0.707273	7.04505e-05
07	Sume01-Seq9-50um		2022-08-30		0.00040802	0.00015228	7.7308e-06	0.000142063	0.00200964	0.000218366	6.16611e-06	0.000167107	-9.27295e-05	0.000182466	0.000700417	0.000145759	-5.63119e-06	0.000143412	5.81001e-05	0.000156999	0.00067173	0.000144392		5.5985			0.000673492	0.000381227	0.031538	0.000317221	9.65681e-05	0.537889	0.000103849	0.385632	4.62257					0.707645	7.42746e-05	104.96	562.423	59				0.707289	6.77777e-05
08	Sume02-Seq9-50um		2022-08-30		0.000401709	0.000202673	4.10163e-06	0.000132719	0.0019919	0.000168198	-2.33585e-06	0.000173376	-0.000108856	0.000141267	0.000703609	0.000150994	5.17736e-06	0.000177938	6.91994e-05	0.000169048	0.000670033	0.000192883		5.75231			0.000602818	0.00034656	0.0323199	0.0002211	8.81282e-05	0.552423	8.55716e-05	0.396055	4.74959					0.707549	6.92277e-05	97.8415	427.258	57				0.707289	8.29867e-05
09	Sume03-Seq9-50um		2022-08-30		0.000406077	0.000150064	8.03488e-06	0.000134035	0.00199214	0.000152002	3.83236e-07	0.000133961	-0.000110938	0.000151624	0.000695548	0.00017021	3.01069e-06	0.000175355	6.72596e-05	0.00015361	0.000669421	0.000168534		5.76086			0.000597225	0.000331937	0.0323652	0.000217797	9.00159e-05	0.553411	8.19807e-05	0.396715	4.75665					0.707541	7.60422e-05	107.474	416.152	59				0.707285	8.44221e-05
10	Sume01-Seq1-50um		2022-09-01		0.000434073	0.000169547	1.98999e-05	0.000168568	0.0020731	0.000192983	-6.76748e-06	0.000138662	-9.90794e-05	0.000145049	0.000714364	0.000148109	2.5688e-06	0.000153249	5.58272e-05	0.000140711	0.000592238	0.000151753		5.25092			0.000644678	0.000364821	0.0295589	0.000244706	0.000107828	0.504255	9.36199e-05	0.361582	4.33562					0.707594	6.23492e-05	88.1144	490.374	56				0.707269	6.84445e-05
11	Sume02-Seq1-50um		2022-09-01		0.000434679	0.000180301	4.65698e-06	0.000161642	0.00208132	0.000199779	-7.59499e-06	0.000157372	-8.84529e-05	0.000135557	0.000723176	0.000156674	-6.69978e-07	0.000191352	6.45786e-05	0.000128574	0.00061726	0.000195459		5.52827			0.000714432	0.000436667	0.0311364	0.000282308	0.00010769	0.530845	0.000112316	0.38066	4.56463					0.707618	6.77713e-05	95.7739	524.821	59				0.707238	7.03485e-05
12	Sume03-Seq1-50um		2022-09-01		0.00042712	0.000183388	5.53092e-06	0.000152475	0.00208983	0.000210992	-9.48289e-07	0.000149382	-9.36655e-05	0.000179809	0.000727814	0.000115132	1.03028e-06	0.000168703	6.35528e-05	0.000156703	0.00063221	0.000202674		5.21933			0.000690618	0.000404863	0.0294112	0.00026574	0.000112994	0.501194	0.000109775	0.359366	4.30949					0.707574	5.44882e-05	77.007	461.887	57				0.707182	6.51715e-05
13	Sume01-Seq2-50um		2022-09-01		0.00043533	0.000149296	1.61393e-05	0.000167887	0.00207051	0.000194559	2.41199e-07	0.000186286	-0.000106812	0.000151194	0.000729804	0.000107894	3.72764e-06	0.000174322	6.46716e-05	0.000139194	0.000617594	0.000164338		5.3419			0.00062353	0.00035816	0.0300295	0.000221474	9.61995e-05	0.512924	8.89317e-05	0.367774	4.41073					0.707535	7.71408e-05	109.028	406.512	59				0.707239	8.37033e-05
14	Sume02-Seq2-50um		2022-09-01		0.000428613	0.000142327	1.30391e-05	0.000142895	0.0020771	0.000168668	-4.04429e-06	0.000166242	-0.000109493	0.000174197	0.000734624	0.00017655	3.95796e-06	0.000124133	6.62947e-05	0.000152949	0.00065797	0.00021036		5.45669			0.00072035	0.000417152	0.0307395	0.000263496	0.000126414	0.523921	0.000107989	0.37566	4.50548					0.707511	6.46679e-05	91.402	373.063	58				0.707147	6.69562e-05
15	Sume03-Seq2-50um		2022-09-01		0.000435438	0.000132302	1.38407e-05	0.000132205	0.00208223	0.000166635	7.18035e-07	0.000211478	-9.07415e-05	0.000155438	0.000740534	0.000154787	-5.25249e-06	0.000177851	6.67855e-05	0.000155599	0.000660339	0.000195047		5.73417			0.000820091	0.000484223	0.0323733	0.00030248	0.000125859	0.550576	0.000141855	0.39484	4.73462					0.707671	5.83212e-05	82.4129	599.496	59				0.707218	6.48376e-05
16	Sume01-Seq1-50um		2022-09-05		0.000409238	0.000163615	9.14106e-06	0.000166427	0.00197703	0.000188044	-7.04977e-06	0.000157867	-7.92356e-05	0.000175273	0.000639242	0.000148073	3.97249e-06	0.000201735	2.29565e-05	0.000158499	0.000193516	0.000156591		5.3298			0.000792031	0.000486154	0.0301209	0.000318399	0.000132273	0.511493	0.000111922	0.366936	4.40116					0.707659	5.18244e-05	73.2336	582.488	57				0.707287	6.03481e-05
17	Sume03-Seq1-50um		2022-09-05		0.000410881	0.000156664	2.53726e-05	0.000139716	0.0019693	0.000203195	4.95366e-06	0.000144226	-7.56251e-05	0.000201506	0.00063719	0.000152296	2.69688e-06	0.000163625	2.05508e-05	0.000154151	0.000189691	0.000156797		5.36813			0.00073431	0.000429936	0.0302544	0.000288486	0.000111691	0.515274	0.000111194	0.369592	4.43281					0.707665	8.08593e-05	114.262	590.738	59				0.707282	8.91964e-05
18	Sume01-Seq2-50um		2022-09-05		0.000408232	0.00016314	1.67859e-05	0.000165031	0.00196679	0.000205531	2.82593e-06	0.000144549	-8.14814e-05	0.000149986	0.000644639	0.000145958	9.91871e-06	0.000137074	3.13238e-05	0.00014455	0.000260179	0.000193642		5.2689			0.000812695	0.00048651	0.0298112	0.00032757	0.000137669	0.505743	0.000118335	0.362829	4.35079					0.707783	7.11117e-05	100.471	758.277	58				0.707342	7.28819e-05
19	Sume02-Seq2-50um		2022-09-05		0.000404039	0.000157956	1.46797e-05	0.000157379	0.00197653	0.000169935	7.203e-06	0.000145034	-8.47691e-05	0.000139129	0.000654375	0.000136742	9.25159e-06	0.000149588	3.86341e-05	0.000162899	0.00033755	0.000222		5.23486			0.000633274	0.000371933	0.0294543	0.000243588	0.00011015	0.502379	9.3042e-05	0.360306	4.32261					0.707517	6.46597e-05	91.3897	381.178	58				0.707147	7.17561e-05
20	Sume03-Seq2-50um		2022-09-05		0.000402662	0.000194782	1.64933e-05	0.000169749	0.00196776	0.000173641	-1.13333e-06	0.000152209	-8.28803e-05	0.000179702	0.000660414	0.000144191	7.51089e-06	0.000145151	3.89904e-05	0.000166188	0.000371829	0.000189229		5.2528			0.000794835	0.000470539	0.0296645	0.000322788	0.000131647	0.504178	0.000120654	0.361649	4.33739					0.70766	6.84985e-05	96.7958	584.089	58				0.707209	7.41747e-05
																																						Average	0.707624							Average	0.707266
																																						2 s.d.	0.000163211							2 s.d.	0.000139323
																																						2 s.d. ppm	230.646							2 s.d. ppm	196.988
01	Sume01-Seq4-25um		2022-08-30		0.000510417	0.000152141	8.33105e-06	0.000115112	0.00250147	0.000179274	2.76801e-06	9.85333e-05	-9.74013e-05	0.00017434	0.000795363	0.000131287	-1.96054e-06	0.000118894	2.97241e-05	0.000129006	0.000142497	0.000176316		1.53679			0.000162814	0.000123841	0.00842923	7.95326e-05	4.11272e-05	0.147498	3.14594e-05	0.105824	1.26894					0.707796	8.65968e-05	122.347	775.723	57				0.707376	0.000140269
02	Sume02-Seq4-25um		2022-08-30		0.000432855	0.000157729	5.86405e-06	0.000152844	0.00212725	0.000232071	1.92909e-06	0.000117468	-8.94469e-05	0.000134281	0.000681168	0.000167399	-3.20079e-06	0.000165577	1.51881e-05	0.000170313	0.000165346	0.000160313		1.55614			0.000209847	0.000119126	0.00878752	8.02363e-05	2.68379e-05	0.149419	3.32044e-05	0.107155	1.28489					0.707714	0.000125116	176.79	659.967	57				0.707217	0.000145183
03	Sume03-Seq4-25um		2022-08-30		0.000431439	0.000174054	-1.08183e-06	0.000101335	0.0021072	0.000209941	-6.47139e-06	0.000211508	-9.74656e-05	0.00013472	0.000683707	0.000164007	-5.78969e-06	0.000141275	2.96466e-05	0.000143749	0.000186302	0.000165448		1.57445			0.000200482	0.000123039	0.00888053	7.647e-05	2.40047e-05	0.151176	2.61561e-05	0.108387	1.29999					0.707521	0.000117926	166.674	387.214	58				0.707176	0.000173115
04	Sume01-Seq5-25um		2022-08-30		0.000424686	0.000137634	-3.78028e-06	0.000127766	0.00207165	0.000218812	-4.75327e-06	0.000167043	-0.000109735	0.000182231	0.000677341	0.000197704	1.26115e-05	0.000127964	2.34586e-05	0.000146386	0.000208219	0.000144582		1.62542			0.000236761	0.000152188	0.00920162	9.09008e-05	4.63553e-05	0.156079	1.2402e-05	0.111917	1.34207					0.70761	7.42753e-05	104.966	513.212	56				0.707475	0.000112359
05	Sume02-Seq5-25um		2022-08-30		0.000417236	0.000171019	9.58267e-06	0.000172838	0.00206102	0.000196544	-2.7456e-06	0.000136862	-8.91992e-05	0.000162936	0.000678819	0.000101238	-5.13605e-06	0.000128712	2.76071e-05	0.000167261	0.000213359	0.000151266		1.59188			0.000215518	0.000123349	0.0090056	9.11241e-05	2.65861e-05	0.152844	2.95483e-05	0.109616	1.31436					0.707734	0.000109269	154.393	688.421	57				0.707332	0.000156644
06	Sume03-Seq5-25um		2022-08-30		0.000420457	0.00016556	3.32151e-06	0.000156697	0.00206647	0.000159914	1.75841e-06	0.000148247	-0.000103592	0.000152841	0.000667646	0.000148927	4.51555e-06	0.00015679	1.75682e-05	0.000130733	0.00020894	0.00014856		1.62018			0.000209792	0.000122543	0.00914488	7.35879e-05	4.70154e-05	0.155584	1.91631e-05	0.111569	1.33774					0.70768	0.00012109	171.109	612.19	58				0.707445	0.000143286
07	Sume01-Seq6-25um		2022-08-30		0.000427116	0.000124352	-2.58084e-06	0.000155277	0.0020562	0.000177485	1.60702e-06	0.000137508	-8.87191e-05	0.000143568	0.000666562	0.000140303	-5.54383e-06	0.000132782	2.54581e-05	0.00016917	0.000214978	0.000162372		1.64914			0.000235697	0.000154039	0.00934745	8.89838e-05	2.65227e-05	0.158358	4.25825e-05	0.113547	1.36164					0.70763	9.15728e-05	129.408	541.613	56				0.707159	0.000145799
08	Sume02-Seq6-25um		2022-08-30		0.000424588	0.000186113	1.29569e-06	0.000167285	0.0020705	0.000163896	5.33634e-06	0.000120381	-9.3265e-05	0.000179095	0.000666898	0.000127992	-1.08048e-05	0.000130155	3.559e-05	0.00016148	0.00022941	0.000144254		1.57032			0.000208097	0.000128704	0.00886972	7.85332e-05	2.49169e-05	0.150796	4.09226e-05	0.108093	1.29654					0.707405	0.000112033	158.371	223.403	60				0.706896	0.000129426
09	Sume03-Seq6-25um		2022-08-30		0.000425677	0.000183635	1.22642e-05	0.000143763	0.00205495	0.000156158	5.17602e-05	0.000130556	-9.75288e-05	0.000173271	0.000676892	0.00013501	-9.20041e-06	0.00016156	2.48258e-05	0.000139906	0.000242838	0.000160359		1.60903			0.000202638	0.000129864	0.00908781	8.16827e-05	2.80549e-05	0.154464	3.30347e-05	0.110772	1.32849					0.707575	0.000102452	144.794	463.977	57				0.707237	0.000157599
10	Sume01-Seq4-25um		2022-09-02		0.000434761	0.000170217	9.74367e-06	0.000153819	0.00207406	0.000192835	4.86427e-05	0.000146914	-8.68368e-05	0.000159397	0.000661356	0.000158955	5.67778e-06	0.000166716	1.85013e-05	0.000159168	9.37282e-05	0.00014538		1.504			0.000278641	0.000175185	0.00855452	0.000119759	4.0062e-05	0.144365	3.8031e-05	0.103556	1.24191					0.707663	0.000122394	172.955	588.031	56				0.707171	0.000174451
11	Sume02-Seq4-25um		2022-09-02		0.000427462	0.000159591	1.12498e-05	0.000149297	0.00208835	0.000201855	5.4889e-05	0.000154838	-7.75787e-05	0.000178241	0.000656328	0.000141203	1.46429e-06	0.000140393	1.57447e-05	0.000166327	0.000108849	0.000158156		1.48476			0.000247971	0.000146237	0.00840171	9.26798e-05	2.9011e-05	0.142499	3.38059e-05	0.102206	1.226					0.707592	0.00012052	170.324	488.47	58				0.70707	0.000160286
12	Sume03-Seq4-25um		2022-09-02		0.000431031	0.000148817	1.06193e-05	0.000149466	0.00208776	0.000191337	2.94112e-05	0.000201961	-9.1192e-05	0.000176454	0.000662303	0.000158236	9.1624e-07	0.000142569	1.19966e-05	0.000134851	0.000119391	0.00018948		1.47955			0.000269403	0.000163711	0.00840825	8.46149e-05	3.47976e-05	0.142007	4.5588e-05	0.101872	1.22169					0.707678	0.000139646	197.33	610.025	56				0.707125	0.000175434
13	Sume01-Seq5-25um		2022-09-02		0.000429047	0.000161776	1.49891e-05	0.000181128	0.00208791	0.000208804	-8.63859e-07	0.000141397	-8.23029e-05	0.000146456	0.000665149	0.000149642	2.87233e-06	0.000158709	1.76515e-05	0.0001669	0.000135839	0.000179997		1.40339			0.000228525	0.000138638	0.00794448	9.45979e-05	2.83513e-05	0.134743	2.95887e-05	0.0966214	1.15878					0.707583	9.94863e-05	140.6	474.925	56				0.707201	0.000157894
14	Sume02-Seq5-25um		2022-09-02		0.000425169	0.000168027	1.21685e-05	0.000149433	0.00209661	0.000180217	1.1686e-06	0.000149069	-9.28956e-05	0.000168812	0.000670972	0.00014248	-3.25172e-06	0.000132087	1.48157e-05	0.000142053	0.000143302	0.000172557		1.40216			0.000229541	0.000140878	0.00793124	9.29284e-05	3.13014e-05	0.134593	3.8033e-05	0.0965406	1.15776					0.707693	0.000123325	174.264	630.775	58				0.707181	0.000184652
15	Sume03-Seq5-25um		2022-09-02		0.000428659	0.000150875	1.16006e-05	0.000175893	0.00209112	0.000160691	3.99326e-06	0.000153532	-9.28198e-05	0.000172339	0.000666545	0.000148595	5.08338e-06	0.000144177	1.21724e-05	0.000144294	0.000141831	0.00015483		1.41624			0.000237122	0.000140862	0.00802129	9.21152e-05	3.22348e-05	0.135952	3.09951e-05	0.0975085	1.16939					0.707672	0.000112084	158.384	601.268	57				0.70718	0.000149134
16	Sume01-Seq4-25um		2022-09-06		0.000406841	0.00017619	1.04771e-05	0.000152739	0.00196627	0.000166899	6.5566e-06	0.000162095	-9.5333e-05	0.000174474	0.000627184	0.000154735	-1.96005e-06	0.000160577	1.04323e-05	0.000177259	7.54481e-05	0.000147967		1.39145			0.000209743	0.000128996	0.00786782	7.42882e-05	3.0203e-05	0.13362	2.68097e-05	0.0958131	1.14898					0.707628	0.000134744	190.417	539.174	59				0.707294	0.000180249
17	Sume03-Seq4-25um		2022-09-06		0.000412534	0.00016445	1.25931e-05	0.000164744	0.00197017	0.000166084	6.3986e-06	0.000134557	-8.86076e-05	0.000134611	0.000633372	0.000139527	-4.93809e-06	0.000158882	9.30086e-06	0.00015516	9.83008e-05	0.000166862		1.4088			0.000210337	0.000133977	0.00796231	7.2734e-05	2.71173e-05	0.135262	3.81787e-05	0.0970079	1.16329					0.707664	0.000144057	203.567	589.572	58				0.707218	0.00015413
18	Sume03-Seq4-25um		2022-09-06		0.000411132	0.000146472	5.60022e-06	0.000158259	0.00196729	0.000173807	7.21265e-06	0.000155736	-8.88117e-05	0.000156735	0.000631514	0.000149653	4.01907e-06	0.000170657	1.21808e-05	0.000152434	0.000116872	0.000157537		1.4263			0.000209561	0.000120383	0.00804659	7.66246e-05	2.82394e-05	0.13696	3.23111e-05	0.0982103	1.17773					0.707528	0.000116997	165.36	397.168	56				0.707109	0.000173557
19	Sume01-Seq5-25um		2022-09-06		0.000411122	0.000148865	8.91493e-06	0.000168399	0.00197081	0.00016664	-3.81682e-06	0.000160344	-9.12441e-05	0.000156387	0.000634644	0.000157155	-4.49923e-06	0.000150734	2.14262e-05	0.00016736	0.000130745	0.000188834		1.51313			0.000231321	0.000136888	0.00854725	8.99594e-05	3.49018e-05	0.145212	3.87927e-05	0.104156	1.24941					0.707633	0.000109048	154.103	546.06	58				0.707093	0.000158861
20	Sume02-Seq5-25um		2022-09-06		0.000414003	0.000169904	1.50173e-05	0.000159561	0.00196973	0.000179673	-5.48122e-06	0.000135584	-8.65544e-05	0.000143123	0.00063048	0.000144584	-1.08956e-05	0.000128638	1.4596e-05	0.000156837	0.000145334	0.000158798		1.49533			0.000220857	0.000126866	0.00844775	9.11017e-05	3.04276e-05	0.143522	3.70543e-05	0.102924	1.2347					0.707545	0.00012581	177.813	420.955	58				0.706949	0.000175088
21	Sume03-Seq5-25um		2022-09-06		0.000415321	0.000154584	6.92314e-06	0.000158314	0.00196545	0.000178712	-2.55168e-06	0.000145605	-8.63008e-05	0.000158997	0.000635291	0.000157657	1.08972e-07	0.000156104	1.36547e-05	0.0001598	0.00014161	0.000180237		1.49994			0.000199035	0.00012598	0.00846037	7.65302e-05	1.72445e-05	0.143937	2.62507e-05	0.103239	1.23851					0.707586	0.000115403	163.094	478.936	57				0.70727	0.000176971
																																						Average	0.707625							Average	0.707199
																																						2 s.d.	0.000171382							2 s.d.	0.000283217
																																						2 s.d. ppm	242.193							2 s.d. ppm	400.477
01	Sume01-Seq1-13um		2022-08-30		0.000452058	0.000192949	5.11719e-06	0.000148987	0.00222413	0.000172227	1.17125e-05	0.000150818	-0.000105068	0.000167014	0.000702535	0.000162342	-6.21993e-07	0.000136316	1.52091e-05	0.000146653	0.000124791	0.000166003		0.38601			6.35755e-05	4.01846e-05	0.00217254	1.71309e-05	1.38253e-05	0.0370608	6.63951e-06	0.0265631	0.318642					0.707397	0.000394248	557.322	211.861	55				0.707199	0.000590398
02	Sume02-Seq1-13um		2022-08-30		0.000462546	0.000150088	4.67547e-06	8.12113e-05	0.00223231	0.000188732	9.61343e-06	0.000145221	-8.9294e-05	0.000175028	0.000714998	0.000171978	3.23258e-06	0.000188758	1.015e-05	0.000133225	0.000123322	0.000116558		0.372808			4.43291e-05	3.90958e-05	0.00209717	1.1363e-05	4.13352e-06	0.0357658	-1.43914e-06	0.0256508	0.307742					0.707515	0.000307778	435.012	379.421	57				0.707619	0.000485928
03	Sume03-Seq1-13um		2022-08-30		0.000450244	0.000125761	3.10552e-06	0.000134717	0.0022152	0.000180698	-1.30692e-06	0.000149732	-8.70616e-05	0.000154863	0.000703267	0.000191139	9.61016e-06	0.000105525	1.10556e-05	0.000149072	0.000125424	0.000153513		0.36766			6.00012e-05	3.42402e-05	0.00206987	2.7538e-05	-3.41948e-07	0.0352793	4.98914e-08	0.0252972	0.303488					0.707395	0.000328459	464.323	209.105	55				0.707179	0.000595884
04	Sume01-Seq2-13um		2022-08-30		0.000451585	0.000156585	2.23734e-05	0.000163013	0.00220024	0.000198016	7.18693e-06	0.000164297	-9.24035e-05	0.000163602	0.000693211	0.0001293	-2.46461e-06	0.000170075	1.31403e-05	0.000135446	0.000130015	0.000136645		0.375238			5.31479e-05	1.33582e-05	0.00211527	9.55782e-06	1.0312e-05	0.0359966	7.74769e-06	0.0258228	0.309741					0.707725	0.000311536	440.193	676.283	58				0.707041	0.000497406
05	Sume02-Seq2-13um		2022-08-30		0.000452579	0.000174342	7.88464e-06	0.000163232	0.0021692	0.000213057	4.83483e-07	0.000149665	-9.41797e-05	0.000130491	0.000689586	0.000143824	-5.33031e-06	0.000143994	1.30559e-05	0.000147382	0.000126876	0.000165057		0.377525			5.09621e-05	3.07426e-05	0.00214645	2.34621e-05	1.80369e-05	0.0362262	7.85535e-06	0.0259802	0.311633					0.707564	0.000327146	462.355	448.871	59				0.70706	0.000538643
06	Sume03-Seq2-13um		2022-08-30		0.000453354	0.000148231	5.42169e-06	0.000187819	0.00216755	0.000182494	-1.65503e-06	0.00015941	-9.81496e-05	0.000146586	0.000689407	0.000145712	-8.92874e-07	0.000113492	1.27037e-05	0.000132496	0.000119779	0.000196969		0.3678			5.49517e-05	3.77367e-05	0.00209091	2.30079e-05	7.43644e-06	0.0353068	7.2132e-06	0.0253124	0.30361					0.707456	0.000358583	506.862	295.646	60				0.706698	0.000607353
07	Sume01-Seq3-13um		2022-08-30		0.000449588	0.000124311	3.63838e-06	0.000111018	0.00216721	0.000217681	2.16739e-06	0.000163406	-0.000103425	0.000169702	0.000687878	0.000170491	-3.44545e-06	0.000134268	1.12811e-05	0.000174567	0.000121921	0.000131149		0.372286			4.84676e-05	4.21496e-05	0.00209335	2.61304e-05	1.68583e-06	0.0357158	1.35529e-05	0.0256192	0.307311					0.707688	0.000350031	494.612	622.923	57				0.707102	0.000519375
08	Sume02-Seq3-13um		2022-08-30		0.000444286	0.000185208	9.23092e-06	0.000144165	0.00215221	0.000213079	6.28057e-06	9.35901e-05	-0.000113775	0.00013399	0.000689029	0.000189188	3.84523e-06	0.000154414	7.63929e-06	0.000152581	0.000120298	0.000182457		0.378038			5.65805e-05	3.45898e-05	0.00213394	2.57685e-05	1.54227e-05	0.036275	1.52875e-06	0.026021	0.312063					0.707749	0.000329336	465.329	709.097	58				0.707334	0.000645102
09	Sume03-Seq3-13um		2022-08-30		0.000450125	0.000195666	1.99752e-05	0.000138146	0.00216916	0.000201287	3.88861e-06	0.000127687	-0.000106827	0.000164771	0.000675923	0.000174349	5.25276e-06	0.000199689	7.5613e-06	0.000136751	0.0001221	0.000155597		0.371784			4.74998e-05	1.5201e-05	0.0020905	1.64885e-05	1.19527e-05	0.0356917	7.958e-06	0.0255848	0.306897					0.707354	0.000356776	504.381	151.643	59				0.70668	0.000624204
10	Sume01-Seq1-13um		2022-09-02		0.000426085	0.000162882	1.07726e-05	0.000168941	0.00213295	0.000177592	4.16031e-06	0.000128725	-9.52566e-05	0.000156375	0.000663927	0.000149128	5.56353e-06	0.000150926	8.67149e-06	0.0001495	5.06998e-05	0.000155874		0.360135			6.84514e-05	3.10637e-05	0.00203602	2.45464e-05	1.3108e-05	0.034555	7.63374e-06	0.0247852	0.297349					0.707556	0.000405156	572.613	436.559	57				0.706836	0.00065117
11	Sume02-Seq1-13um		2022-09-02		0.000437125	0.00016634	5.27754e-06	0.000161132	0.0021335	0.000183428	-1.10672e-05	0.000150811	-9.73042e-05	0.000142859	0.000675237	0.000151389	5.55346e-06	0.000153493	1.61233e-05	0.000135068	5.92239e-05	0.000136177		0.348646			4.92664e-05	3.27533e-05	0.00198336	3.65391e-05	1.2018e-05	0.0334394	5.16944e-06	0.0239908	0.287853					0.70779	0.000330955	467.588	768.131	57				0.706728	0.000559117
12	Sume03-Seq1-13um		2022-09-02		0.000435783	0.000159651	6.76774e-06	0.000165044	0.00214036	0.000182901	-1.63241e-06	0.000135752	-8.93197e-05	0.000180439	0.000672011	0.000143773	1.85818e-06	0.000174374	1.31961e-05	0.000148757	5.82987e-05	0.000155394		0.358733			6.10451e-05	3.97491e-05	0.00201811	1.86111e-05	1.59624e-06	0.0343993	1.08819e-05	0.0246899	0.296184					0.707733	0.000377936	534.01	686.975	57				0.707217	0.000605269
13	Sume01-Seq2-13um		2022-09-02		0.000440692	0.000154753	1.53278e-05	0.000141744	0.00213606	0.000173237	-5.57053e-06	0.000142395	-9.10559e-05	0.000162049	0.000664791	0.000155425	6.33462e-06	0.000150159	1.25063e-05	0.000179732	5.94808e-05	0.000160443		0.364882			5.83761e-05	2.84425e-05	0.00206391	2.31447e-05	1.35992e-05	0.0350082	4.26048e-06	0.0251135	0.30126					0.707571	0.000333333	471.095	457.885	58				0.707016	0.000500285
14	Sume02-Seq2-13um		2022-09-02		0.000433108	0.00013781	9.88697e-06	0.000161637	0.00213853	0.000165311	-7.57819e-06	0.000148147	-9.02919e-05	0.000189829	0.000671526	0.000165088	-1.44317e-06	0.000132057	2.44456e-06	0.000172652	6.21675e-05	0.000160672		0.3584			5.96118e-05	4.09433e-05	0.00202006	2.96942e-05	8.36879e-06	0.0343758	1.48281e-05	0.0246707	0.295905					0.707894	0.000295181	416.985	914.356	57				0.706815	0.000590321
15	Sume03-Seq2-13um		2022-09-02		0.000440157	0.000139797	1.38062e-05	0.000154331	0.00213389	0.000191992	8.66112e-07	0.00014942	-9.07332e-05	0.000186189	0.000665725	0.000176643	1.4079e-07	0.000153532	1.78157e-05	0.000159457	5.68868e-05	0.000160825		0.358575			5.82152e-05	2.78024e-05	0.00202412	2.07067e-05	2.14867e-06	0.0343975	9.6559e-06	0.0246661	0.296054					0.70734	0.00029387	415.458	131.158	58				0.706096	0.000623929
16	Sume01-Seq3-13um		2022-09-02		0.000429586	0.000165731	6.6039e-06	0.00015129	0.00212756	0.000183636	4.90182e-06	0.000146374	-9.5094e-05	0.000165347	0.00066392	0.000152997	3.69677e-06	0.000142024	1.20705e-05	0.000120267	6.42627e-05	0.000181957		0.359709			6.7421e-05	5.12866e-05	0.00204337	2.11311e-05	2.07236e-06	0.0345164	5.6187e-06	0.0247491	0.296983					0.707389	0.000344727	487.324	200.102	57				0.706872	0.000644979
17	Sume02-Seq3-13um		2022-09-02		0.000434691	0.000153625	1.55122e-06	0.00016508	0.00213362	0.000193172	2.42554e-07	0.000136909	-9.43952e-05	0.000163127	0.000665899	0.000161829	2.4104e-06	0.00013438	1.52115e-05	0.000161317	6.39746e-05	0.000192517		0.358666			5.26171e-05	4.02258e-05	0.00201685	3.36468e-05	1.73992e-05	0.0344045	7.59525e-06	0.0246792	0.296122					0.70756	0.000339208	479.405	441.985	57				0.706945	0.000682655
18	Sume03-Seq3-13um		2022-09-02		0.000433841	0.000163508	1.05574e-05	0.000162188	0.00212323	0.000174284	3.05958e-06	0.000168228	-9.83383e-05	0.000150284	0.00066493	0.000169252	1.61014e-06	0.00016366	1.34596e-05	0.000129768	6.3299e-05	0.000143636		0.351226			5.35851e-05	4.52727e-05	0.00198709	2.80936e-05	3.77034e-06	0.0336881	2.34068e-06	0.0241717	0.289979					0.707786	0.000343283	485.011	761.508	57				0.707388	0.000696042
19	Sume01-Seq5-13um		2022-09-06		0.000437917	0.000169511	1.12296e-05	0.000171734	0.00205856	0.00019554	5.3327e-06	0.000158194	-0.000100381	0.000165019	0.000653011	0.000159342	2.67498e-06	0.000152094	2.34896e-06	0.000148461	6.77679e-05	0.000172016		0.392756			5.84238e-05	3.8742e-05	0.00219638	2.25528e-05	1.09861e-06	0.0376703	4.50354e-06	0.0270336	0.32427					0.707663	0.000310762	439.138	588.26	55				0.707497	0.000518855
20	Sume02-Seq5-13um		2022-09-06		0.000424883	0.00019059	1.31075e-05	0.000132648	0.00203649	0.000174335	-2.11618e-07	0.00015119	-0.000102053	0.00016852	0.000646351	0.000185977	2.98287e-06	0.000174398	1.05479e-05	0.000152461	7.08509e-05	0.000169864		0.394233			5.46711e-05	2.83825e-05	0.0022182	2.48914e-05	4.95712e-06	0.0378175	8.61384e-06	0.0271193	0.325486					0.707302	0.000290954	411.357	77.9484	58				0.706541	0.000481543
21	Sume03-Seq5-13um		2022-09-06		0.000425968	0.000156326	1.84076e-05	0.00016282	0.00203619	0.000181663	3.9311e-06	0.000126839	-0.000100084	0.000169907	0.000644284	0.000137254	2.19726e-06	0.000160203	9.72399e-06	0.000155396	7.08978e-05	0.000163245		0.396194			5.43506e-05	2.78794e-05	0.00223329	1.96669e-05	9.7515e-06	0.0380104	9.53552e-06	0.0272665	0.327106					0.707602	0.000331146	467.984	501.947	57				0.706925	0.000598297
																																						Average	0.707573							Average	0.70699
																																						2 s.d.	0.00034258							2 s.d.	0.000693669
																																						2 s.d. ppm	484.162							2 s.d. ppm	981.158
01	Sume01-Seq2-10um		2022-09-06		0.000400727	0.000157285	7.0678e-06	0.00016299	0.00198339	0.000188976	6.20837e-06	0.000137117	-9.50569e-05	0.000175579	0.00062581	0.000166645	1.52313e-06	0.000148461	9.96747e-06	0.000159816	6.32675e-05	0.000155821		0.193072			3.64689e-05	1.13156e-05	0.00108109	1.51301e-05	2.44805e-06	0.0185112	7.4228e-06	0.0132779	0.159375					0.70724	0.00059545	841.935	-9.33687	57				0.706056	0.000968599
02	Sume02-Seq2-10um		2022-09-06		0.000406741	0.000164381	3.32555e-06	0.000162746	0.00197836	0.000190354	9.32142e-06	0.000145346	-9.15036e-05	0.00016752	0.000619125	0.000135506	7.75734e-06	0.000174327	7.03448e-06	0.000160203	6.45921e-05	0.000154082		0.196688			3.75529e-05	2.6897e-05	0.00111302	9.54293e-06	-1.15901e-06	0.0188656	2.9944e-06	0.0135373	0.16236					0.707832	0.00053767	759.601	827.665	55				0.707483	0.00113139
03	Sume03-Seq2-10um		2022-09-06		0.000407265	0.000174433	9.46888e-06	0.000166322	0.00197597	0.000203961	5.55012e-06	0.000148275	-9.45638e-05	0.000148894	0.000627994	0.000150116	8.22444e-07	0.000161772	1.04754e-05	0.000148639	6.57691e-05	0.000185167		0.188641			2.9555e-05	1.50559e-05	0.00107334	1.26156e-05	9.85787e-06	0.0180833	5.30453e-06	0.0129726	0.155714					0.707498	0.000710101	1003.68	354.636	57				0.706265	0.00133815
04	Sume01-Seq3-10um		2022-09-06		0.000406152	0.000150264	1.98104e-06	0.00017253	0.00198019	0.0002086	9.39433e-06	0.000163577	-8.84841e-05	0.000163913	0.00062723	0.00015236	5.25992e-06	0.000153802	1.10685e-05	0.000152602	6.53582e-05	0.00014054		0.196309			3.70408e-05	2.02218e-05	0.00110756	1.57769e-05	3.55308e-06	0.0188298	4.92633e-06	0.0135053	0.162047					0.707777	0.000639404	903.398	748.786	55				0.706786	0.00132517
05	Sume02-Seq3-10um		2022-09-06		0.000411302	0.00017655	4.05313e-06	0.000163793	0.00197449	0.000181013	1.14717e-05	0.000136016	-9.48078e-05	0.00016287	0.000616645	0.000140343	5.05131e-06	0.000164949	1.10242e-05	0.000160002	5.97192e-05	0.000166162		0.195583			3.46072e-05	1.89925e-05	0.00110613	1.30664e-05	8.44117e-06	0.0187662	3.0073e-06	0.0134611	0.161452					0.707792	0.000589148	832.375	770.108	55				0.707117	0.00117134
06	Sume03-Seq3-10um		2022-09-06		0.00041137	0.000162341	9.11271e-06	0.000152013	0.00198258	0.000179144	8.80567e-06	0.000146755	-8.87894e-05	0.000181463	0.000624112	0.000156219	7.84984e-06	0.000170919	1.12791e-05	0.000158326	6.69401e-05	0.000152132		0.1928			2.8107e-05	1.82301e-05	0.00109033	7.59476e-06	8.13559e-06	0.0184976	-7.58425e-06	0.0132634	0.159147					0.707548	0.000682141	964.092	425.127	57				0.708376	0.00120232
07	Sume01-Seq6-10um		2022-09-06		0.000420121	0.000157195	4.10591e-06	0.000172492	0.00200067	0.000185279	1.25872e-05	0.000147576	-9.62675e-05	0.000175269	0.000634298	0.000160969	-3.01002e-06	0.00017037	1.63591e-05	0.000167568	8.60815e-05	0.000152505		0.196408			2.60426e-05	2.60601e-05	0.00110027	1.33321e-05	-1.33667e-06	0.0188264	8.77306e-06	0.0135058	0.162108					0.707524	0.000618148	873.678	391.355	57				0.706706	0.00118352
08	Sume02-Seq6-10um		2022-09-06		0.000414641	0.000164827	4.4591e-06	0.000152222	0.00198622	0.000193236	1.1156e-05	0.000146991	-9.4794e-05	0.000181469	0.000620381	0.000150441	6.87032e-06	0.000164762	1.36981e-05	0.00014363	8.42889e-05	0.000161929		0.19244			3.31128e-05	2.24268e-05	0.00108492	1.69747e-05	7.77974e-07	0.0184699	2.09477e-06	0.0132471	0.158832					0.707532	0.000634586	896.9	403.495	57				0.706891	0.00112646
09	Sume03-Seq6-10um		2022-09-06		0.000412153	0.000161236	3.43335e-06	0.00017967	0.00198637	0.000191776	6.03798e-06	0.000135704	-9.93052e-05	0.000152753	0.000619116	0.000151816	-7.87702e-07	0.000178972	1.29805e-05	0.000158885	8.3421e-05	0.000164169		0.187277			3.39996e-05	2.63871e-05	0.00106034	5.5115e-06	7.56439e-06	0.0179682	-7.37578e-06	0.0128826	0.15457					0.707425	0.000659562	932.341	252.337	57				0.708226	0.00108165
10	Sume01-Seq1-10um		2022-09-07		0.000417079	0.00016352	2.20558e-06	0.000158343	0.00203498	0.000190445	1.74058e-05	0.000174602	-8.74716e-05	0.000161765	0.000640219	0.000167468	3.36488e-06	0.000137774	1.1526e-05	0.000131066	6.50679e-05	0.000162744		0.1749			3.63919e-05	1.13e-05	0.000988287	8.17427e-06	3.71082e-06	0.0167627	6.48002e-06	0.0120223	0.144367					0.707179	0.000637137	900.956	-96.015	54				0.705979	0.00138873
11	Sume02-Seq1-10um		2022-09-07		0.000415109	0.000148049	1.9086e-06	0.000171124	0.00203695	0.000206226	1.29941e-05	0.000133113	-9.28201e-05	0.000165388	0.000645425	0.000167391	8.36016e-06	0.000145408	1.36594e-05	0.00015732	6.10419e-05	0.000162886		0.171909			2.32162e-05	1.84962e-05	0.000971437	1.38705e-05	2.40401e-06	0.0164738	-2.19785e-06	0.0118236	0.141901					0.707638	0.000687434	971.448	553.327	57				0.706803	0.0014674
12	Sume03-Seq1-10um		2022-09-07		0.000421573	0.000142546	4.80392e-07	0.00013106	0.00203134	0.000173825	1.53891e-05	0.000144923	-9.67864e-05	0.000170941	0.00063376	0.000147049	4.47355e-06	0.000159456	1.69209e-05	0.000161326	6.36006e-05	0.000165322		0.178161			2.0599e-05	1.70569e-05	0.0010082	8.07516e-06	7.4113e-06	0.0170917	3.73291e-06	0.012252	0.147061					0.707138	0.000743821	1051.88	-153.445	57				0.706859	0.00137698
13	Sume01-Seq2-10um		2022-09-07		0.000412622	0.000179063	9.49337e-06	0.000139225	0.00203099	0.000196305	9.05922e-06	0.000147219	-8.83242e-05	0.000178566	0.000642435	0.0001547	4.37598e-06	0.000177278	1.62284e-05	0.000164502	6.58412e-05	0.000153255		0.173071			3.1431e-05	1.15994e-05	0.00097785	1.65751e-05	-3.20368e-07	0.0165817	1.02227e-05	0.0118989	0.142856					0.707682	0.00078911	1115.06	614.484	56				0.705793	0.00142335
14	Sume02-Seq2-10um		2022-09-07		0.000413025	0.000187113	-8.91268e-07	0.000170809	0.00202262	0.000181601	1.37244e-05	0.000143849	-9.27677e-05	0.000146903	0.000642254	0.0001324	6.91753e-06	0.000150963	1.66043e-05	0.000159271	6.4692e-05	0.000143512		0.180435			3.29927e-05	3.29789e-05	0.00103068	1.9965e-05	9.48242e-08	0.017298	8.1503e-06	0.0124148	0.148938					0.707834	0.000683414	965.501	829.402	56				0.70642	0.00159765
15	Sume03-Seq2-10um		2022-09-07		0.000416411	0.000183087	4.15687e-06	0.000173199	0.00202891	0.000172078	1.40867e-05	0.000162384	-8.7531e-05	0.000156999	0.000641798	0.000132245	2.79886e-06	0.000164135	1.62022e-05	0.000156888	6.55407e-05	0.00016608		0.174278			2.89113e-05	2.10391e-05	0.000989453	7.79621e-06	8.61236e-06	0.0167038	1.64426e-05	0.011988	0.143853					0.708023	0.000698965	987.206	1097.88	58				0.705213	0.00124557
16	Sume01-Seq3-10um		2022-09-07		0.000416333	0.000168592	4.72199e-07	0.000153591	0.00203829	0.000173751	1.84064e-05	0.000154348	-8.43147e-05	0.000164953	0.000635804	0.000132688	9.91356e-07	0.000175986	1.31711e-05	0.000149935	6.2425e-05	0.000159845		0.173568			3.78782e-05	2.87596e-05	0.000975438	7.65762e-06	-2.72277e-06	0.0166374	3.19518e-06	0.0119415	0.14327					0.707748	0.000766237	1082.64	707.911	57				0.707428	0.00113866
17	Sume02-Seq3-10um		2022-09-07		0.000414923	0.000192364	1.52359e-06	0.000154527	0.00203586	0.000193492	9.37553e-06	0.000166945	-8.84625e-05	0.000166575	0.000638192	0.000163736	2.68642e-06	0.000131325	2.00436e-05	0.000146902	5.90094e-05	0.000164865		0.173222			3.04016e-05	1.53852e-05	0.000977911	1.48677e-05	-6.70099e-06	0.016606	4.40214e-06	0.0119059	0.142988					0.707087	0.000822601	1163.37	-225.981	57				0.706277	0.00125076
18	Sume03-Seq3-10um		2022-09-07		0.000415541	0.000160904	4.32009e-06	0.000148997	0.00203763	0.000182209	1.60838e-05	0.000153035	-8.24394e-05	0.000182299	0.000641705	0.000121876	4.61759e-06	0.000163033	1.69676e-05	0.000145501	6.42068e-05	0.000130977		0.17401			3.21281e-05	2.26235e-05	0.000990498	3.66954e-06	3.64691e-06	0.0166708	1.55725e-05	0.0119746	0.143633					0.708094	0.000609378	860.589	1197.88	54				0.705916	0.00166432
19	Sume01-Seq4-10um		2022-09-07		0.000413739	0.000155065	-8.35463e-07	0.000171613	0.00203102	0.000179241	1.39693e-05	0.00015144	-8.73063e-05	0.000153528	0.000639563	0.000152214	6.38398e-06	0.000138424	1.47173e-05	0.000157572	6.24632e-05	0.000171023		0.175876			3.55165e-05	2.59006e-05	0.00100695	1.69204e-05	3.5314e-06	0.0168628	9.70112e-06	0.0120961	0.145176					0.707463	0.000592799	837.922	305.942	56				0.705741	0.00122637
20	Sume03-Seq4-10um		2022-09-07		0.000417307	0.000172622	2.29312e-06	0.000180649	0.00202796	0.000175161	1.81251e-05	0.000138662	-9.38233e-05	0.000151264	0.000635317	0.000157563	8.47386e-06	0.000150537	1.20466e-05	0.000154258	6.53111e-05	0.000167121		0.176602			3.33371e-05	2.26492e-05	0.000997605	3.74307e-06	-3.27532e-06	0.0169384	-4.12917e-07	0.0121357	0.145773					0.706669	0.000660068	934.056	-817.911	57				0.706149	0.00135537
21	Sume02-Seq4-10um		2022-09-07		0.00041637	0.000163001	2.81475e-06	0.000153709	0.00203308	0.00018127	2.23373e-05	0.00014666	-8.86867e-05	0.000157969	0.000639829	0.000157442	2.80209e-06	0.000167995	1.45954e-05	0.000131029	5.76107e-05	0.00015969		0.179638			3.57403e-05	2.03425e-05	0.0010237	1.29737e-05	4.61383e-06	0.017215	4.38736e-06	0.0123545	0.148287					0.707766	0.000618674	874.121	734.167	57				0.707295	0.00116547
																																						Average	0.707547							Average	0.706656
																																						2 s.d.	0.000681424							2 s.d.	0.00161837
																																						2 s.d. ppm	963.08							2 s.d. ppm	2290.19
[truncated: 3 more columns]
