# Supplementary material for: High spatial resolution (10–50 μm) analysis of Sr isotopes in rock-forming apatite by LA-MC-ICP-MS
Source: J Anal At Spectrom. 2023 Aug 29;38(10):2113–26. doi: 10.1039/d3ja00177f (PMC10549232; doi:10.1039/d3ja00177f)
Supplement: JA-038-D3JA00177F-s002 [file JA-038-D3JA00177F-s002.xlsx]

## Sheet: Sheet1
									Intensities (V) corrected for background											Method 1 Mass bias correction							Method 2 Mass bias, REE, Rb and Ca correction
	Date	Sample name				total Sr(v) raw			83Kr	83.5	84Sr	85Rb	85.49	86Sr	86.5	87Sr	88Sr			87Sr/86Sr MB corr	2 s.e.	2 s.e. ppm	no. cycles				87Sr/86Sr MB corr	2 s.e.	2 s.e. ppm	no. cycles
	2022-06-14	Rb 0.5ppb NBS987-50ppb				15.2019			-1.44747e-05	-1.49924e-06	0.0799861	0.0860747	7.70348e-06	1.45777	8.79428e-06	1.08417	12.5525			0.733404	1.19612e-05	16.3092	37				0.710267	1.07819e-05	15.18	37
	2022-06-14	Rb 1ppb NBS987-50ppb				15.2739			2.47675e-05	-4.94455e-07	0.0804918	0.16578	1.07377e-06	1.46446	5.93581e-06	1.12072	12.6119			0.754614	9.06625e-06	12.0144	37				0.710265	9.4149e-06	13.2555	36
	2022-06-14	Rb 2.5ppb NBS987-50ppb				15.616			-2.35492e-05	2.52701e-07	0.0820693	0.426982	3.7221e-06	1.49709	7.45771e-06	1.24806	12.8945			0.821983	1.23734e-05	15.0531	38				0.710252	1.00088e-05	14.0919	37
	2022-06-14	Rb 5ppb NBS987-50ppb				15.458			0.000161742	1.00369e-05	0.0820532	0.842065	-3.06057e-06	1.48208	3.8073e-05	1.40207	12.7639			0.932813	1.44452e-05	15.4856	37				0.710249	1.0995e-05	15.4805	37
	2022-06-14	Rb 10ppb NBS987-50ppb				15.0216			9.84439e-06	4.71108e-06	0.0790831	1.68576	1.7526e-06	1.43997	6.78588e-06	1.70707	12.4035			1.16883	2.76814e-05	23.683	39				0.710273	1.31663e-05	18.537	38
	2022-06-14	Rb 20ppb NBS987-50ppb				15.3536			9.86692e-06	4.11378e-07	0.0807685	3.30153	7.89814e-06	1.47152	7.8028e-06	2.37202	12.6777			1.58919	5.70706e-05	35.9117	38				0.710262	1.92066e-05	27.0416	38
	2022-06-14	Rb 25ppb NBS987-50ppb				14.9124			4.91146e-06	-2.137e-06	0.0784505	4.07674	1.75668e-05	1.42925	7.00966e-06	2.64955	12.3134			1.82766	8.18488e-05	44.7833	38				0.710249	2.22211e-05	31.2864	39
	2022-06-16	Er 5ppb NBS987-50ppb				15.046			0.0014831	0.000961777	0.0804159	0.000604791	7.74263e-06	1.44251	6.97478e-07	1.03908	12.4235			0.710269	8.41225e-06	11.8438	38				0.710268	8.99215e-06	12.6602	38
	2022-06-16	Er 10ppb NBS987-50ppb				14.8562			0.00283661	0.00184243	0.0805021	0.00116644	6.31076e-06	1.42404	3.79858e-06	1.02589	12.2667			0.710276	7.99024e-06	11.2495	39				0.710274	7.86243e-06	11.0696	38
	2022-06-16	Er 15ppb NBS987-50ppb				14.6479			0.00433325	0.00280946	0.0806632	0.00174885	4.53942e-06	1.40418	-6.81941e-07	1.01154	12.0947			0.710273	1.15202e-05	16.2193	39				0.710276	1.37908e-05	19.4161	40
	2022-06-16	Er 20ppb NBS987-50ppb				14.8057			0.00587756	0.00381652	0.0827646	0.00244194	6.13582e-06	1.41923	1.98335e-06	1.02241	12.225			0.71028	7.7743e-06	10.9454	38				0.710276	8.8628e-06	12.478	39
	2022-06-16	Er 25ppb NBS987-50ppb				14.7827			0.00718969	0.00466791	0.0837023	0.00288878	4.73991e-06	1.41686	9.46443e-07	1.02075	12.206			0.710271	1.04146e-05	14.6629	39				0.71027	1.11432e-05	15.6886	39
	2022-06-16	Er 30 ppb NBS987-50ppb				14.5591			0.0089512	0.00582026	0.0840209	0.00365043	1.26586e-05	1.39561	9.13259e-06	1.00539	12.0214			0.710275	8.55799e-06	12.0488	37				0.710264	9.54774e-06	13.4425	37
	2022-06-16	Er 35 ppb NBS987-50ppb				14.6877			0.0104239	0.00678352	0.0859189	0.00419731	1.08636e-05	1.40795	4.3857e-06	1.01427	12.1276			0.710275	7.68277e-06	10.8166	38				0.710274	9.3331e-06	13.1401	38
	2022-06-16	Er-20ppb Yb 20ppb NBS987-100ppb				28.3592			0.00578813	0.00413774	0.154116	0.00255194	0.00102009	2.72165	0.00101856	1.96138	23.4176			0.710935	6.72584e-06	9.46056	39				0.710268	5.98949e-06	8.43272	38
	2022-06-16	Er-20ppb Yb 20ppb Rb 5 pppb NBS987-100ppb				33.9442			0.00591878	0.00423167	0.183589	0.832711	0.00103703	3.25719	0.00104687	2.67669	28.0297			0.810633	8.83287e-06	10.8963	37				0.710285	7.25356e-06	10.2122	38
	2022-06-15	Yb 5ppb NBS987 50 ppb				15.066			-5.91378e-06	-2.90545e-06	0.0793155	4.73152e-05	0.000264224	1.445	0.0002626	1.04116	12.4405			0.710596	1.19649e-05	16.8378	38				0.710274	1.23055e-05	17.325	37
	2022-06-15	Yb10ppb NBS987 50 ppb				15.2522			-4.3458e-06	-1.0333e-06	0.0803089	7.81556e-05	0.000526065	1.46319	0.000532542	1.05463	12.5942			0.710919	9.83817e-06	13.8387	38				0.710274	9.91858e-06	13.9644	39
	2022-06-15	Yb15ppb NBS987 50 ppb				15.4239			-1.74472e-06	6.21225e-07	0.0812188	0.00012908	0.000806889	1.47996	0.000802149	1.06708	12.7359			0.711234	9.86212e-06	13.8662	37				0.710265	1.01099e-05	14.234	38
	2022-06-15	Yb20ppb NBS987 50 ppb				15.4964			-2.82845e-06	5.78439e-07	0.0816145	0.000202152	0.00109848	1.4873	0.00110026	1.07278	12.7958			0.711595	1.045e-05	14.6854	39				0.710281	1.09021e-05	15.3489	40
	2022-06-15	Yb25ppb NBS987 50 ppb				15.5955			-1.06878e-06	1.73088e-06	0.0820948	0.000223551	0.00139555	1.49686	0.00140889	1.08017	12.8777			0.711938	1.03488e-05	14.5361	39				0.710267	1.01445e-05	14.2826	38
	2022-06-15	Yb30 ppb NBS987 50 ppb				15.5984			3.26354e-06	-1.79369e-06	0.0821057	0.000275827	0.00169775	1.49738	0.00171984	1.08104	12.8801			0.712313	1.12801e-05	15.8359	38				0.71027	1.00775e-05	14.1883	37
	2022-06-15	Yb30 ppb NBS987 50 ppb				15.471			-3.33189e-06	-1.13959e-06	0.0814059	0.000314163	0.00195889	1.48526	0.00198546	1.07273	12.7749			0.712634	1.02669e-05	14.407	38				0.71026	1.04575e-05	14.7234	37
	2022-06-15	NBS987 50 ppb 1				14.294			2.16836e-06	-2.35229e-07	0.0752436	4.87225e-05	2.25231e-05	1.37061	1.27249e-05	0.987254	11.8029			0.710284	9.13499e-06	12.861	38				0.71025	9.52474e-06	13.4104	38
	2022-06-16	NBS987 50 ppb 2				14.3421			2.48187e-05	-7.98056e-07	0.0755468	-3.13713e-05	3.1012e-05	1.37529	3.50141e-06	0.990559	11.8422			0.71027	1.0031e-05	14.1228	38				0.710265	1.20445e-05	16.9578	39
	2022-06-15	NBS987 50 ppb 3				13.7366			-1.8389e-06	-2.61931e-06	0.0722904	9.06882e-06	9.45214e-06	1.31707	8.08928e-06	0.948696	11.3426			0.710265	9.94745e-06	14.0053	38				0.710249	1.12854e-05	15.8894	37
	2022-06-16	NBS987 50 ppb 4				14.3215			1.31434e-05	1.3654e-07	0.0754242	-3.29974e-05	1.72319e-05	1.37327	7.50377e-06	0.989112	11.8252			0.710265	9.44496e-06	13.2978	38				0.710256	9.24705e-06	13.0193	36
	2022-06-15	NBS987 50 ppb 5				14.7919			-8.44251e-08	-7.24039e-07	0.0778292	-4.77723e-06	9.19903e-06	1.4181	3.30979e-06	1.02152	12.2141			0.710255	1e-05	14.0794	37				0.71025	1.03747e-05	14.6071	37
	2022-06-16	NBS987 50 ppb 6				14.3726			1.01774e-05	-7.57877e-07	0.0756874	-2.59124e-05	1.93582e-05	1.37817	5.79475e-06	0.992651	11.8673			0.71027	1.03038e-05	14.5069	38				0.710261	1.1358e-05	15.9913	39
	2022-06-16	NBS987 50 ppb 7				14.311			7.05408e-06	-1.49714e-06	0.0753575	-2.16537e-05	1.74957e-05	1.37227	3.42237e-06	0.988387	11.8165			0.710256	1.05389e-05	14.8381	38				0.710247	8.77094e-06	12.3491	36
	2022-06-16	NBS987 50 ppb 8				14.1578			5.68522e-06	2.88778e-06	0.0745083	-3.54059e-05	8.6861e-06	1.35734	5.38667e-06	0.977704	11.69			0.710254	7.85483e-06	11.0592	38				0.710245	8.02245e-06	11.2953	37
	2022-06-16	NBS987 50 ppb 9				14.8874			6.38293e-06	7.77931e-07	0.0783701	-3.3366e-05	1.2586e-05	1.42739	1.42031e-06	1.02815	12.2925			0.71026	8.43948e-06	11.8822	36				0.710259	1.02262e-05	14.3979	38
	2022-06-16	NBS987 50 ppb 10				14.6249			2.6786e-06	4.91955e-06	0.0768903	-3.27469e-05	7.22459e-06	1.40159	3.8892e-06	1.00979	12.0757			0.710262	8.05086e-06	11.3351	37				0.710255	9.13067e-06	12.8555	38
