# Supplementary material for: High spatial resolution (10–50 μm) analysis of Sr isotopes in rock-forming apatite by LA-MC-ICP-MS
Source: J Anal At Spectrom. 2023 Aug 29;38(10):2113–26. doi: 10.1039/d3ja00177f (PMC10549232; doi:10.1039/d3ja00177f)
Supplement: JA-038-D3JA00177F-s003 [file JA-038-D3JA00177F-s003.xlsx]

## Sheet: Sheet1
					Background measurements (V)																						Intensities corrected for background (V)													Method 1 Mass Bias correction only								Method 2 Mass Bias ,REE, Rb and Ca correction
Processed analysis #	Sample name				83Kr	3sd	83.5	3sd	84Sr	3sd	85Rb	3sd	85.5	3sd	86Sr	3sd	86.5	3sd	87Sr	3sd	88Sr	3sd		Total Sr(V) raw			83Kr	83.5	84Sr	85Rb	85.49	86Sr	86.5	87Sr	88Sr					87Sr/86Sr	2 s.e.	2 s.e. ppm	deviation from true (ppm)	no. cycles				87Sr/86Sr	2 s.e.
01	Dur01-Seq7-50um				0.000438552	0.000152391	6.29808e-07	9.62645e-05	0.00211066	0.000134956	1.63079e-06	0.000115213	-9.18629e-05	0.000130987	0.000697604	0.000120107	1.15466e-06	0.00010227	3.34247e-05	0.000135829	0.000273476	0.000122888		4.17041			0.00199336	0.00123954	0.0252455	0.00081179	0.000313122	0.400526	0.000279176	0.287206	3.44365					0.707683	8.10861e-05	114.58	1918.58	58				0.706428	7.28627e-05
02	Dur02-Seq7-50um				0.000436829	0.000127905	3.97071e-06	0.000127106	0.00213235	0.000129771	3.07274e-06	0.000126459	-8.84004e-05	0.000112087	0.000701821	0.000137906	9.32888e-06	0.000114395	4.81005e-05	0.000130724	0.000310358	0.000113725		4.16301			0.00189568	0.00117458	0.0251077	0.000771383	0.000277077	0.399851	0.000259067	0.28669	3.4375					0.707628	6.33253e-05	89.4895	1840.55	57				0.706455	7.03685e-05
03	Dur03-Seq7-50um				0.000447051	0.000124487	2.05475e-06	0.000104584	0.00212325	0.000137006	7.01216e-06	0.000105391	-9.55154e-05	0.000117761	0.000706077	0.000140239	8.36497e-06	0.000127822	5.03169e-05	0.000113215	0.000325118	0.000126888		4.02795			0.00194387	0.00121954	0.0244199	0.00078874	0.000310944	0.386879	0.000283839	0.277428	3.32595					0.70776	7.56336e-05	106.863	2027.6	57				0.706448	7.16067e-05
04	Dur01-Seq8-50um				0.000435275	0.000127706	5.27953e-06	0.000125401	0.00211124	0.00014558	1.50465e-06	0.000117307	-9.30095e-05	0.000110359	0.000703302	0.000129027	2.58625e-06	0.000122563	4.61264e-05	0.000121787	0.000352961	0.000123338		3.20574			0.000693096	0.000406073	0.0187666	0.000245547	0.000111073	0.30774	9.6959e-05	0.220494	2.64695					0.706917	7.63828e-05	108.051	833.752	56				0.706396	9.24968e-05
05	Dur02-Seq8-50um				0.000431092	0.000123846	3.99749e-06	0.000128231	0.00211712	0.000141023	-3.3004e-06	0.00010877	-8.89722e-05	0.000101178	0.00070589	0.000125121	5.29219e-06	0.000120688	4.14683e-05	0.000122073	0.000328711	0.000112072		3.21268			0.000714378	0.000421293	0.0188212	0.000284889	0.000102684	0.308392	8.88661e-05	0.220978	2.6527					0.706949	8.71386e-05	123.26	879.516	58				0.70645	8.35473e-05
06	Dur03-Seq8-50um				0.000436664	0.000121909	5.57157e-06	0.000159592	0.00212949	0.000138884	9.06878e-06	9.51185e-05	-9.92773e-05	0.00012138	0.000690426	0.000115009	4.47568e-06	9.68886e-05	5.29095e-05	0.000121736	0.00031386	0.000128871		3.29307			0.000756718	0.000443537	0.0193085	0.000284092	0.000111798	0.3161	9.78146e-05	0.226492	2.7191					0.706954	9.0963e-05	128.669	886.183	59				0.706385	0.000107229
07	Dur01-Seq11-50um				0.000437213	0.000106585	5.03231e-06	9.87161e-05	0.00210815	0.000124495	1.97986e-06	9.4583e-05	-9.06251e-05	0.000103795	0.000697495	0.000118254	4.65067e-06	0.000136668	3.27644e-05	0.000109482	0.000298174	0.000132018		3.32044			0.000784007	0.000454638	0.0195413	0.000311948	0.000110485	0.318747	0.000102459	0.228408	2.74173					0.706993	7.27593e-05	102.914	941.424	57				0.7064	8.89561e-05
08	Dur02-Seq11-50um				0.00044357	8.90488e-05	8.14421e-06	0.00013172	0.00211999	0.000133416	1.60714e-06	0.000145493	-0.000100175	0.000103859	0.000704928	0.000118266	-4.1565e-06	0.000118359	3.53659e-05	0.000116911	0.000315273	0.000113989		2.97044			0.00062376	0.000365749	0.017411	0.000247226	0.000104566	0.285216	9.83917e-05	0.204406	2.45267					0.707183	7.41942e-05	104.915	1210.54	58				0.706583	9.27073e-05
09	Dur03-Seq11-50um				0.000444543	0.000131374	8.74512e-06	0.000133788	0.00210172	0.000146966	1.13389e-05	0.000109411	-0.000102088	0.000136657	0.000696218	0.000131314	-1.70494e-06	0.000113897	4.53007e-05	0.000116135	0.000317376	0.000107055		3.67427			0.000948519	0.000576448	0.0217087	0.000396494	0.000143523	0.35264	0.000124499	0.252737	3.03389					0.707033	6.48787e-05	91.7619	997.917	57				0.706396	7.75835e-05
10	Dur01-Seq12-50um				0.000438755	0.000111045	5.48788e-06	0.000134676	0.00210557	0.000147666	1.0727e-05	0.000132416	-9.55244e-05	0.000106885	0.000703225	0.000109538	6.25915e-06	0.000113573	4.46585e-05	0.000114899	0.000345278	0.000128577		3.53268			0.000855082	0.000508837	0.0207597	0.000313363	0.000133668	0.339044	0.000109062	0.243002	2.91694					0.707098	6.71264e-05	94.9322	1090.6	57				0.706513	9.2368e-05
11	Dur02-Seq12-50um				0.00044108	0.000125234	5.94845e-06	9.37071e-05	0.00210833	0.000114507	2.89415e-06	0.000122858	-9.4375e-05	0.000121151	0.000704258	9.55378e-05	1.2996e-06	0.000105658	4.86685e-05	0.000109231	0.000344532	0.000133045		3.44256			0.000843908	0.000500853	0.0202888	0.000316542	0.000136361	0.330431	0.000108289	0.236796	2.84253					0.707008	5.92399e-05	83.7897	962.198	58				0.706447	8.15858e-05
12	Dur03-Seq12-50um				0.000431426	0.000124254	5.53519e-06	0.00011343	0.00210225	0.000180464	3.75636e-06	0.000113703	-8.85071e-05	0.000110991	0.000704253	0.000137005	-1.785e-06	9.55434e-05	4.62477e-05	0.000116953	0.000336388	0.000121186		3.51569			0.000905712	0.000531311	0.0207628	0.000347833	0.000142264	0.337446	0.000129596	0.241825	2.90292					0.707039	5.48441e-05	77.5687	1006.28	55				0.706341	7.63128e-05
13	Dur01-Seq13-50um				0.000425255	0.000104518	1.12253e-05	0.000138211	0.00208466	0.000124706	-1.93896e-05	0.00010002	-9.88574e-05	0.000140735	0.000784861	0.000112939	4.51429e-06	0.000133211	0.000118285	0.000126726	0.00108439	0.000144191		3.80486			0.0016755	0.00103989	0.0228336	0.000677349	0.000237356	0.365268	0.000219359	0.261876	3.14097					0.707482	6.77588e-05	95.7746	1633.89	58				0.706415	7.25153e-05
14	Dur02-Seq13-50um				0.000430209	9.22729e-05	7.41202e-09	0.000103903	0.00206915	0.000152406	-2.27438e-05	0.000149354	-0.000105368	0.000132771	0.000757194	0.000121369	-1.55557e-07	0.000116187	9.42493e-05	0.000107149	0.000860265	0.000137239		3.91421			0.00190253	0.00120181	0.0236745	0.000788068	0.000304931	0.375893	0.00029504	0.269554	3.2315					0.707704	7.56295e-05	106.866	1947.66	58				0.706326	6.69872e-05
15	Dur03-Seq13-50um				0.000433932	0.00012363	1.18824e-05	0.000119251	0.00209225	0.000149448	-1.6369e-05	0.000163662	-0.000102463	0.000128	0.000749106	0.000101714	-3.94703e-06	9.89854e-05	7.79565e-05	9.82227e-05	0.000770902	0.000133725		3.93646			0.00180986	0.00114251	0.0236781	0.000733541	0.000265297	0.377885	0.000245773	0.270983	3.24996					0.707576	6.35922e-05	89.8734	1766.26	59				0.706398	6.81767e-05
16	Dur01-Seq14-50um				0.000442393	0.000140967	1.52679e-05	0.00013835	0.0020891	0.000133439	-1.43723e-05	0.000110006	-0.000113082	0.00013912	0.000736126	9.16035e-05	9.56256e-06	0.00013957	7.4932e-05	0.000111556	0.000715227	0.000136595		3.8352			0.0016312	0.00102585	0.0229759	0.000663817	0.00025137	0.368192	0.00021933	0.263989	3.16639					0.707501	8.17098e-05	115.491	1661.3	59				0.70642	9.42115e-05
17	Dur02-Seq14-50um				0.000436239	0.000117539	9.88314e-06	9.22897e-05	0.00208561	0.00012026	-1.37615e-05	0.00012101	-0.000104832	0.000134186	0.000733567	0.000118846	5.20606e-06	0.000114901	7.06676e-05	0.000136473	0.000649033	0.000110125		3.91873			0.00181153	0.0011368	0.0235778	0.000738505	0.000274457	0.376191	0.000245138	0.269768	3.23544					0.707569	6.82718e-05	96.4879	1757.02	59				0.706402	7.01936e-05
18	Dur03-Seq14-50um				0.00044054	0.000101935	3.55931e-06	0.000118402	0.00208174	0.000113564	-5.99065e-06	0.000114565	-0.000101577	0.000141804	0.000723102	0.000132964	3.15967e-06	0.000121111	7.53584e-05	0.000132655	0.000602443	0.000120719		3.77427			0.00162699	0.0010157	0.0226052	0.000655503	0.000226609	0.362324	0.000216475	0.25979	3.11619					0.707502	7.97331e-05	112.697	1662.7	57				0.706428	9.73268e-05
19	Dur01-Seq15-50um				0.000427607	0.000127877	1.57019e-05	0.000116416	0.00204815	0.000142898	-2.99183e-06	0.000119131	-0.00010483	0.000106603	0.000713009	0.000106918	6.14058e-06	0.000114866	5.993e-05	0.000118747	0.000560642	0.00012304		3.43236			0.000788519	0.00046262	0.0200676	0.000299337	0.000115669	0.329349	0.00011357	0.236023	2.83388					0.706985	8.21607e-05	116.213	930.024	58				0.706389	0.00010056
20	Dur02-Seq15-50um				0.000429143	0.000110767	6.10891e-06	0.000141229	0.00206225	0.000157992	-1.88539e-06	0.000101534	-0.000104362	0.000100956	0.000708188	9.52723e-05	5.49619e-06	0.000137347	7.03387e-05	0.000108962	0.000521873	0.000122089		3.39453			0.000783975	0.000475554	0.0198571	0.000294296	0.000120678	0.325756	0.000107678	0.233411	2.80268					0.706878	9.03101e-05	127.759	778.791	58				0.706279	0.000104023
21	Dur03-Seq15-50um				0.000437985	0.000102993	6.06987e-06	0.000114561	0.00206787	0.000117499	-1.42104e-06	0.000125211	-0.000101071	0.000107181	0.000708452	0.0001083	2.80757e-06	0.000107502	6.15045e-05	0.000114937	0.000506389	0.000104936		3.21522			0.000765473	0.000460133	0.0188899	0.000298775	0.00012302	0.308573	0.000106346	0.221133	2.65462					0.707041	8.45635e-05	119.602	1008.94	58				0.706396	0.000103325
22	Dur01-Seq16-50um				0.000427235	0.000137879	-1.3103e-06	0.000108632	0.00207131	0.000147529	-3.94022e-06	0.000119846	-9.45088e-05	0.000145485	0.000711123	0.000106782	-3.12453e-07	0.000102912	5.11994e-05	0.000116104	0.000495532	0.000111479		3.2441			0.000774737	0.000465794	0.0190497	0.000290864	0.000110316	0.311348	0.000115558	0.223102	2.67848					0.706972	9.07404e-05	128.351	911.832	57				0.706313	0.000102314
23	Dur02-Seq16-50um				0.000437039	0.000110457	1.28255e-05	0.000128829	0.00207477	0.000136445	-6.87516e-06	0.000111605	-0.000100765	0.000125351	0.000700248	0.000105166	-1.24029e-06	0.00015679	5.84856e-05	0.000107601	0.000468772	0.000152151		3.31264			0.000807906	0.000475368	0.0194683	0.000303851	0.000122279	0.317962	0.000116476	0.227851	2.73511					0.707027	6.76116e-05	95.628	990.212	55				0.706375	8.182e-05
24	Dur03-Seq16-50um				0.00043966	0.000118391	4.15744e-06	0.000134413	0.00208459	0.000154259	1.47993e-06	0.000128896	-0.00011182	0.000152175	0.000712393	8.67967e-05	9.87262e-06	0.000104437	5.92462e-05	0.000106626	0.000452974	9.07589e-05		3.0937			0.000706199	0.000419438	0.0181219	0.000254834	0.000114587	0.296958	0.000102969	0.212808	2.55432					0.70707	6.32373e-05	89.4357	1049.94	57				0.706418	7.64533e-05
25	Dur01-Seq17-50um				0.000437996	0.000104329	1.48609e-06	0.000126274	0.00207816	0.000127626	-1.64418e-05	0.000105103	-0.00010576	0.000121431	0.000702319	0.000115323	8.3051e-06	9.26831e-05	6.35021e-05	0.000107714	0.000456404	0.000130695		3.05464			0.000698704	0.000416548	0.0178912	0.000259042	0.000124589	0.293227	9.51255e-05	0.2101	2.52206					0.706986	7.24837e-05	102.525	931.818	59				0.706413	9.05253e-05
26	Dur02-Seq17-50um				0.000442348	0.000117346	-4.79041e-06	0.000124844	0.0020775	0.000130005	-1.5692e-05	0.000134426	-9.05845e-05	0.000102996	0.000701635	0.000141809	4.90737e-06	0.000115395	5.05719e-05	0.00010921	0.000437789	0.000105286		3.17959			0.000752166	0.000460197	0.01867	0.000284723	0.000110632	0.305162	0.000112516	0.218671	2.62526					0.706961	7.86567e-05	111.26	896.482	58				0.706301	8.13634e-05
27	Dur03-Seq17-50um				0.000442484	0.00012891	4.51101e-06	0.000102365	0.00207721	0.000126999	-1.38028e-05	0.000133754	-0.000117297	0.00011679	0.000699597	0.000138805	-2.22264e-06	0.00012262	5.15192e-05	0.000128479	0.000423585	0.000126196		3.1003			0.000719364	0.000428452	0.0181753	0.000279248	0.000128827	0.297606	0.000110679	0.213246	2.5598					0.707001	9.34436e-05	132.169	953.213	59				0.706324	0.000115222
28	Dur01-Seq1-50um				0.000440492	0.000137468	7.79161e-06	0.000123369	0.00215999	0.000157721	1.51551e-05	0.000109591	-0.000104446	0.00013465	0.000685755	0.000110081	5.8699e-06	8.78904e-05	1.74346e-05	0.000128214	7.69773e-05	0.000124401		3.43351			0.000843514	0.000507635	0.0202133	0.00031914	0.000126242	0.329513	0.000117423	0.236156	2.83532					0.707003	7.74795e-05	109.589	955.768	57				0.706338	0.000104718
29	Dur02-Seq1-50um				0.000443083	0.000118537	1.64628e-05	0.000127686	0.00218597	0.000141397	1.63563e-06	8.85517e-05	-0.000118523	0.000122464	0.000691967	0.000110313	-1.64735e-06	0.000114203	2.75705e-05	0.00012279	0.000153728	0.000112986		3.61393			0.00089677	0.000531308	0.0212261	0.00034629	0.000149521	0.34686	0.000125667	0.248575	2.98423					0.706994	5.85208e-05	82.774	943.514	56				0.706368	6.97948e-05
30	Dur03-Seq1-50um				0.000443293	0.000126165	9.88847e-06	0.000101685	0.00218897	0.000171886	1.64724e-06	0.000106972	-0.000107512	0.000140242	0.000705815	0.000124297	6.69233e-06	0.000114273	2.55258e-05	0.000138559	0.000200788	0.000133082		3.52981			0.000907012	0.000553939	0.0207694	0.000337808	0.000143666	0.338731	0.000119259	0.242765	2.91472					0.707005	7.73151e-05	109.356	958.721	57				0.706367	8.98362e-05
31	Dur01-Seq2-50um				0.000437753	0.000114906	3.94234e-06	0.000115775	0.00218094	0.000162708	-1.13321e-05	0.000120894	-0.000103431	0.000122932	0.000713263	0.000124123	3.24701e-06	0.000112575	2.69784e-05	0.000103865	0.000232873	0.000106122		3.49988			0.000913771	0.000543579	0.0205809	0.000346135	0.000125703	0.335819	0.00011627	0.240704	2.88998					0.707006	6.16689e-05	87.2255	959.343	58				0.706412	7.86485e-05
32	Dur02-Seq2-50um				0.000448926	0.000129857	3.67744e-06	0.000102154	0.0021797	0.000150457	-1.01983e-05	0.00011411	-0.000100602	0.000127926	0.000709499	0.000117913	9.25357e-06	0.000127546	4.67951e-05	0.000119647	0.000251792	0.000128962		3.53703			0.000918431	0.000567057	0.020815	0.000366064	0.000140638	0.339395	0.000105656	0.243233	2.92062					0.706955	6.59962e-05	93.3528	887.241	57				0.706384	8.40953e-05
33	Dur03-Seq2-50um				0.00044487	0.000105079	9.20428e-06	9.93064e-05	0.00218552	0.000156928	-1.57796e-05	0.000114609	-0.000105691	0.000133204	0.000701192	0.00011658	6.18388e-06	0.00013005	3.39716e-05	0.000111822	0.000264703	0.00011505		3.38403			0.000837571	0.000509488	0.0198646	0.000329688	0.000121555	0.324768	0.000109613	0.232734	2.79427					0.706941	7.04651e-05	99.676	868.198	59				0.70635	9.28243e-05
34	Dur01-Seq4-50um				0.000442324	0.000126882	1.31404e-05	0.000102059	0.00215396	0.000118418	-3.25483e-06	0.000123177	-9.29114e-05	0.000131565	0.000689515	0.000107974	1.09119e-05	0.000128583	1.9203e-05	0.000104125	0.000132813	0.000125362		3.07251			0.000743411	0.000434311	0.0181388	0.000284036	0.000121641	0.294891	9.44466e-05	0.211356	2.53715					0.707068	8.27099e-05	116.976	1048.24	58				0.706446	9.91284e-05
35	Dur02-Seq4-50um				0.000435037	0.000131915	8.17198e-06	0.000119485	0.00213804	0.000127397	-8.85843e-07	0.000118858	-9.7717e-05	0.000133323	0.000688295	0.000110798	1.9617e-05	0.000112028	2.04776e-05	0.000114458	0.000180434	0.000126788		3.44149			0.000879013	0.00051958	0.0202851	0.000332493	0.000130915	0.33024	0.000110213	0.236684	2.8418					0.706979	6.68924e-05	94.6172	921.418	57				0.706392	7.46687e-05
36	Dur03-Seq4-50um				0.000439519	0.000119185	9.03477e-06	0.000130412	0.0021323	0.000142225	-4.49876e-06	0.00010426	-9.7338e-05	0.000120739	0.000692426	0.000112373	1.59156e-05	0.000125176	2.17866e-05	0.00010646	0.000208646	0.000120671		3.49052			0.000851454	0.000515803	0.0205555	0.000334193	0.000139588	0.334963	9.64288e-05	0.240078	2.88226					0.70703	9.09642e-05	128.657	994.565	58				0.70653	9.46673e-05
37	Dur01-Seq5-50um				0.000434514	0.000128785	5.26081e-06	0.000118608	0.00211787	0.000142036	-1.1324e-05	0.000113078	-9.7186e-05	0.00011809	0.000684173	0.000123197	4.99325e-06	0.000121255	2.44542e-05	0.000122848	0.000234258	0.000134036		3.47295			0.000847229	0.000505107	0.0204321	0.000339132	0.000123999	0.333302	0.000111115	0.238855	2.86773					0.706962	7.71973e-05	109.196	897.577	58				0.706378	8.93985e-05
38	Dur02-Seq5-50um				0.00043185	0.000121913	5.46787e-06	0.000104044	0.00211416	0.000135256	7.11169e-07	0.000104712	-0.00010488	0.000140113	0.000684114	0.000115279	6.85937e-06	0.000126893	2.22079e-05	0.000114988	0.000236133	0.000138251		3.29246			0.000793292	0.000472597	0.0193674	0.000306089	0.000127724	0.315973	0.000111927	0.226427	2.71868					0.706915	6.77773e-05	95.8775	831.266	57				0.706264	9.07492e-05
39	Dur03-Seq5-50um				0.00043152	0.000116879	5.17752e-06	0.000118566	0.00209697	0.000136696	-8.53607e-06	0.000100273	-0.000102165	0.000119864	0.000686987	0.000131672	1.33475e-05	0.000113026	2.63028e-05	0.000124155	0.000224659	0.000137784		3.16199			0.000751563	0.000446567	0.0186019	0.000292572	0.000124439	0.30347	0.000100891	0.217478	2.61094					0.706988	6.44546e-05	91.168	933.909	56				0.7064	7.86163e-05
40	Dur01-Seq6-50um				0.000426902	0.00012374	6.20678e-06	0.000121583	0.00209034	0.00015115	4.22549e-06	0.000119785	-8.85788e-05	0.00012576	0.000670297	0.000126031	7.66073e-06	0.00012238	2.23154e-05	0.000113401	0.000198842	0.000139843		3.29756			0.000812009	0.000491805	0.0194071	0.000302301	0.000123898	0.316431	0.000104504	0.226787	2.72292					0.706958	0.000102808	145.423	891.469	58				0.706364	0.000113055
41	Dur02-Seq6-50um				0.00042457	0.000120568	5.16667e-06	0.000122616	0.00209109	0.000143776	-1.03386e-06	0.000119023	-9.45623e-05	0.00013229	0.000675355	0.000103719	1.12734e-05	0.000110254	3.08168e-05	0.000114872	0.000220714	0.000145713		3.44491			0.000912967	0.000557161	0.0203362	0.000349653	0.000134242	0.330507	0.000117371	0.236899	2.84459					0.706994	7.07531e-05	100.076	942.824	58				0.706346	8.64702e-05
42	Dur03-Seq6-50um				0.000420918	0.000129589	1.20341e-05	0.000124971	0.00208662	0.000146061	-6.3283e-06	0.000102562	-9.83124e-05	0.000130966	0.000679578	0.000108715	8.12094e-06	0.000111988	2.59783e-05	0.000123709	0.000229175	0.000138476		3.30397			0.00081907	0.000474433	0.0194452	0.000313423	0.000126184	0.317028	0.000108192	0.227216	2.72819					0.706944	7.21815e-05	102.104	872.42	57				0.706346	9.80423e-05
43	Dur02-Seq1-50um				0.000429973	0.000122931	9.01796e-06	0.000111614	0.00207051	0.00013946	1.04715e-05	0.000112708	-0.000108974	0.000120155	0.000667479	0.000100631	1.12099e-06	0.000113352	1.86631e-05	0.000120067	0.000157486	0.000129893		3.33811			0.000764198	0.00045371	0.0195656	0.000281874	0.000125089	0.320404	0.000100432	0.229599	2.75645					0.70696	7.7833e-05	110.095	895.027	57				0.70641	9.81744e-05
44	Dur03-Seq1-50um				0.000424115	0.000130883	6.19314e-06	0.000117144	0.0020703	0.00011766	-2.83481e-06	0.000124792	-0.000101644	0.000119653	0.000671907	0.00011789	-3.14424e-06	0.000123835	2.57487e-05	0.000110724	0.000175881	0.000131579		3.25349			0.000730903	0.000431933	0.0190365	0.000273271	0.000106232	0.312282	9.18016e-05	0.22376	2.68656					0.706888	7.4135e-05	104.875	792.786	58				0.706358	8.41098e-05
45	Dur02-Seq2-50um				0.000421914	0.000124515	1.10417e-05	0.000113372	0.00205498	0.000144466	5.31148e-06	0.000120777	-9.84282e-05	0.000130402	0.00067125	0.000121694	-5.53879e-06	0.000112633	2.70934e-05	0.000122986	0.000197519	0.000120615		3.30431			0.000729613	0.000429567	0.0193273	0.000278219	0.000107615	0.317144	9.62252e-05	0.227249	2.7285					0.706873	8.19923e-05	115.993	771.076	57				0.706372	8.20969e-05
46	Dur03-Seq2-50um				0.000421554	0.00010934	8.73644e-06	0.000118002	0.00205574	0.000139648	8.06535e-06	0.000133833	-0.000111405	0.000105971	0.000665587	0.000125046	-7.83485e-07	0.000113963	2.48668e-05	0.000114476	0.000204326	0.000121638		3.31498			0.00080061	0.000471889	0.0194485	0.000326554	0.000126232	0.318194	9.76788e-05	0.228086	2.73731					0.707163	8.12571e-05	114.906	1182.46	58				0.706638	9.37788e-05
47	Dur01-Seq5-50um				0.000415166	0.000132943	1.42518e-05	0.000127578	0.00204652	0.000119701	6.52607e-06	0.000123234	-9.31724e-05	0.000120214	0.000658938	0.000114026	6.37691e-06	0.000114625	1.38251e-05	0.000123498	0.000121713	0.000123448		3.20718			0.000813122	0.000481103	0.0188897	0.000317053	0.000130088	0.307883	0.000113867	0.220694	2.64837					0.707256	9.46891e-05	133.882	1313.22	58				0.706618	0.000102801
48	Dur02-Seq5-50um				0.000414833	0.000114408	7.40993e-06	0.000120759	0.00204062	0.00014368	9.12205e-06	0.00012837	-8.43933e-05	0.000126825	0.000650083	0.000109433	1.00265e-05	0.000133919	1.95435e-05	0.000116439	0.000179427	0.00013399		3.50941			0.000981855	0.000595233	0.0207245	0.000372927	0.000149002	0.336708	0.000127986	0.241345	2.89789					0.706999	7.41777e-05	104.919	950.253	59				0.706307	8.4208e-05
49	Dur03-Seq5-50um				0.000419657	0.000129893	1.24619e-05	0.000119175	0.00202686	0.000152871	3.72428e-06	0.000120523	-9.21484e-05	0.000121244	0.000655556	0.000116939	6.18747e-06	0.00010051	2.67202e-05	0.0001275	0.000207105	0.000132172		3.21656			0.000836538	0.000516183	0.0189652	0.000322813	0.000129876	0.308693	0.000120062	0.221241	2.65603					0.707039	9.17873e-05	129.819	1006.12	58				0.706327	9.66516e-05
50	Dur01-Seq6-50um				0.000415945	0.000128309	1.3501e-05	0.00011654	0.00202215	0.000122459	-1.09394e-06	0.000119384	-9.90157e-05	0.000126037	0.000651069	0.000112571	3.10115e-06	0.00011335	2.46118e-05	0.000103068	0.000219755	0.000125034		3.55437			0.00103407	0.000631665	0.0210149	0.00040786	0.00015269	0.341015	0.000152003	0.244431	2.93497					0.706969	7.56508e-05	107.007	907.361	57				0.706196	9.15873e-05
51	Dur02-Seq6-50um				0.000411065	0.000117089	3.60239e-06	0.000121773	0.00202499	0.000141082	-3.06592e-06	0.000112792	-9.83267e-05	0.000115595	0.00065922	0.000122962	9.27023e-06	0.00011915	2.8622e-05	0.00011782	0.000224478	0.000130778		3.4712			0.000993426	0.000615911	0.0205196	0.000396036	0.000147785	0.33303	0.000135944	0.238725	2.86629					0.707034	6.41074e-05	90.6708	999.923	57				0.706259	8.17765e-05
52	Dur03-Seq6-50um				0.000406157	0.000114314	7.89854e-06	0.000102331	0.00202314	0.000153908	-1.70954e-06	0.000115444	-9.42823e-05	0.000113568	0.000655064	0.000111467	3.45801e-06	0.000113414	2.63571e-05	0.000120467	0.000231811	0.000130759		3.03662			0.000816336	0.000498185	0.0178822	0.000351002	0.000119336	0.291436	0.000113398	0.208892	2.50741					0.707077	9.09156e-05	128.579	1061.12	58				0.706388	0.000100151
																																						Average	0.707106							Average	0.706392
																																						2 s.d.	0.000483702							2 s.d.	0.000163329
																																						2 s.d. ppm	684.059							2 s.d. ppm	231.216
01	Dur01-Seq7-25um				0.000430414	0.000131392	8.85841e-06	0.000112172	0.00211439	0.000124763	3.61798e-06	0.000104392	-0.000100643	0.000124738	0.000677001	9.73564e-05	-5.49084e-06	0.000121238	1.10803e-05	0.000102413	0.000138761	7.69735e-05		0.905244			0.000256528	0.000154972	0.0053861	9.13647e-05	4.69111e-05	0.0869402	4.61988e-05	0.0623214	0.747415					0.707462	0.000147287	208.19	1604.85	58				0.70639	0.000239859
02	Dur02-Seq7-25um				0.000442691	0.000104883	5.63444e-06	0.000152145	0.00210452	0.000139441	-8.06867e-06	0.00011441	-9.88424e-05	0.000102731	0.000674087	0.000106933	-6.7741e-06	0.000136744	2.46701e-05	0.00011018	0.000151534	0.000141129		0.915137			0.00023885	0.000149431	0.00544603	0.000111493	4.68823e-05	0.0879103	4.47934e-05	0.0629916	0.755568					0.707219	0.000155913	220.459	1261.51	58				0.706318	0.000235852
03	Dur03-Seq7-25um				0.000433917	0.000103936	8.72762e-06	0.000119499	0.0021038	0.00013354	1.35883e-05	0.000125265	-8.99792e-05	0.0001294	0.000676033	0.000140438	9.97322e-06	0.000125311	1.97547e-05	0.000127261	0.000159474	0.000138472		0.908408			0.000243422	0.000149891	0.00539819	9.40244e-05	3.82873e-05	0.0872708	2.93308e-05	0.0625271	0.75001					0.70719	0.000124526	176.086	1219.85	58				0.706595	0.000245404
04	Dur01-Seq8-25um				0.000428904	0.000116526	5.14917e-06	0.000125976	0.00209136	0.000133559	4.76744e-06	9.43685e-05	-0.000102491	0.000131328	0.000678683	0.000108092	9.85201e-06	0.000128888	2.45313e-05	0.000132961	0.000172255	0.000129617		0.905244			0.000252851	0.000158944	0.00541539	9.41329e-05	4.38001e-05	0.0869311	3.37841e-05	0.0623044	0.747378					0.707299	0.000143034	202.225	1374.6	57				0.7065	0.000239542
05	Dur02-Seq8-25um				0.000436088	0.000124663	1.77878e-06	0.000118982	0.00209973	0.000138589	9.25845e-06	0.000137376	-0.000101076	0.000113279	0.000681399	0.000107266	-6.71817e-06	0.000118701	1.67269e-05	0.000105927	0.000177651	0.000128426		0.892601			0.00023626	0.000153338	0.0053077	9.19587e-05	4.50689e-05	0.085754	3.64249e-05	0.0614522	0.736933					0.707451	0.000123382	174.404	1589.47	55				0.706636	0.000225211
06	Dur03-Seq8-25um				0.000425377	0.000130307	6.78527e-06	0.000128395	0.00209584	0.000105777	5.65693e-06	0.000107282	-9.49167e-05	0.000162818	0.000673554	0.000109242	-7.02577e-06	0.000115674	2.18469e-05	0.000114232	0.000174552	9.87894e-05		0.896061			0.00024629	0.000140067	0.00531791	8.73794e-05	4.52728e-05	0.0860837	3.60395e-05	0.0616808	0.739791					0.707241	0.000186127	263.174	1292.48	59				0.706567	0.000322922
07	Dur01-Seq9-25um				0.000432222	0.000140857	-9.78856e-07	0.00010853	0.0020902	0.000122852	4.82406e-06	0.000130573	-0.000100385	0.000123044	0.000675299	0.000118256	-7.3926e-06	0.000105294	1.80263e-05	0.000119441	0.000161923	0.000118321		0.895914			0.000253039	0.000151341	0.00531901	9.53709e-05	4.53731e-05	0.0860447	4.44836e-05	0.0616649	0.739689					0.707302	0.000131242	185.553	1379.27	56				0.706381	0.000238846
08	Dur02-Seq9-25um				0.000427492	0.000101651	1.55336e-05	0.000111456	0.00209379	0.000152374	1.08409e-05	0.000112775	-0.000103907	0.00014451	0.000665423	0.000113221	2.30791e-06	0.000137781	1.37913e-05	0.000111263	0.000171699	0.000113384		0.939052			0.000262632	0.000154476	0.00559336	9.49303e-05	4.59423e-05	0.0902266	2.43442e-05	0.0646431	0.775304					0.707232	0.000169265	239.334	1279.39	59				0.706727	0.00025333
09	Dur03-Seq9-25um				0.000449471	0.000108181	1.30886e-05	0.000128913	0.0021457	0.000137258	7.76819e-06	0.000119532	-9.97686e-05	0.000167095	0.000692092	8.8039e-05	-7.31585e-06	9.24882e-05	8.15092e-06	0.000133388	0.000177672	0.000131218		0.896794			0.000237351	0.000130999	0.00532563	8.85459e-05	4.94337e-05	0.0861448	4.77432e-05	0.061741	0.7404					0.707421	0.000153778	217.379	1546.98	58				0.706414	0.000213106
10	Dur02-Seq3-25um				0.000432383	0.00013249	8.49558e-06	0.000116505	0.00210163	0.000136442	1.44977e-06	0.00011517	-9.98195e-05	0.000128336	0.000662438	0.000113206	-9.79692e-08	0.000122294	8.23013e-06	0.000107577	7.71667e-05	0.000129403		0.840206			0.000260787	0.000157605	0.00498986	0.000102142	4.07002e-05	0.0806622	2.89546e-05	0.0578163	0.693767					0.707176	0.000164961	233.268	1200.22	58				0.706571	0.000254729
11	Dur03-Seq3-25um				0.000427707	0.000131058	1.03905e-05	0.000123098	0.00209874	0.000130364	-1.07201e-06	0.000103835	-9.97009e-05	0.0001373	0.000664243	0.000110344	3.92385e-06	0.00011167	8.17099e-06	0.000111758	9.80243e-05	0.000131122		0.852941			0.000256997	0.0001678	0.00507104	0.000109711	4.02727e-05	0.0818797	3.45832e-05	0.0586828	0.704262					0.70707	0.000145802	206.205	1050.49	57				0.706264	0.000283673
12	Dur01-Seq4-25um				0.00042527	0.000123915	1.04678e-05	0.000117977	0.00208526	0.000140171	-1.28922e-06	0.000122291	-9.64732e-05	0.000132512	0.000664736	0.000110323	6.74037e-06	0.000123385	5.55112e-06	0.00012504	9.56285e-05	0.000137702		0.8426			0.000262269	0.000158142	0.005013	0.00010359	3.52525e-05	0.0808984	3.85454e-05	0.0579763	0.695724					0.707139	0.000170452	241.044	1148.31	57				0.706146	0.00029811
13	Dur02-Seq4-25um				0.000429968	0.000109827	1.43645e-05	0.000109197	0.00209372	0.000140186	-1.42239e-05	0.000113169	-9.85772e-05	0.000140062	0.000666192	0.000108101	-2.91825e-06	0.000123189	4.32878e-06	0.00011617	0.00010622	0.000129441		0.850423			0.000256495	0.000151139	0.00505258	0.000102112	4.1398e-05	0.0816321	4.04885e-05	0.0585089	0.702174					0.707285	0.000165866	234.511	1354.29	56				0.706185	0.000227527
14	Dur03-Seq4-25um				0.000429972	0.00013	1.03925e-05	0.000122244	0.00208985	0.000133637	-9.08809e-06	0.000123244	-9.60645e-05	0.000130078	0.000663993	0.000124246	5.88372e-06	0.000122726	7.97672e-06	0.000116513	0.000105447	0.000122105		0.842567			0.000251274	0.0001645	0.00500498	9.76439e-05	3.76888e-05	0.0808679	2.67752e-05	0.0579689	0.695686					0.707236	0.000182295	257.757	1284.91	59				0.706636	0.000245059
15	Dur01-Seq6-25um				0.00040646	0.000125114	6.08897e-06	0.000133239	0.00196712	0.00014168	5.34263e-07	0.000110816	-9.51855e-05	0.000113199	0.000630676	0.000100831	-2.23456e-06	0.000106595	1.74293e-05	0.000104211	0.00012882	0.000115381		0.916007			0.000249252	0.000147065	0.00539522	8.75411e-05	3.51117e-05	0.0879181	2.64779e-05	0.0630062	0.75631					0.707001	0.000157481	222.745	953.146	56				0.706518	0.000225755
16	Dur02-Seq6-25um				0.000407713	0.000120114	1.00103e-05	0.000117619	0.00197783	0.000136236	-1.42831e-06	0.00012121	-9.30725e-05	0.000117528	0.000632965	0.00011123	-8.00893e-06	0.000121459	1.41268e-05	0.000116146	0.000132529	0.000125619		0.909139			0.000246968	0.000146117	0.00534705	8.52748e-05	4.3193e-05	0.0872596	2.03039e-05	0.0625267	0.750636					0.70697	0.000173693	245.686	908.714	58				0.706657	0.000268032
17	Dur03-Seq6-25um				0.000405236	0.000124728	1.41649e-05	0.000119726	0.00197176	0.000136873	-4.92738e-06	0.000106164	-9.96946e-05	0.000132891	0.000631858	0.000103618	-5.90737e-06	0.000116249	1.37974e-05	0.000120978	0.000133602	0.000129725		0.915314			0.000256868	0.000143823	0.00539662	0.000108447	3.80052e-05	0.0878683	4.10136e-05	0.0629617	0.755733					0.707043	0.000158984	224.858	1012.19	57				0.706035	0.000265709
18	Dur01-Seq7-25um				0.000413045	0.000143316	6.37333e-06	0.000117411	0.00198123	0.000156422	5.44473e-06	0.000127212	-9.36758e-05	0.000115679	0.000634224	0.000102361	-7.22843e-06	0.000103539	1.39553e-05	0.000126145	0.000117813	0.000116853		0.458634			0.000129338	7.62096e-05	0.00276449	5.57222e-05	2.0246e-05	0.0451452	1.64704e-05	0.0323475	0.388333					0.707009	0.00015706	222.147	964.084	58				0.706218	0.000240104
19	Dur02-Seq7-25um				0.000407276	0.000111737	7.40756e-06	0.000121422	0.0019811	0.000149473	6.1773e-05	0.00011729	-0.000102792	0.000118246	0.000636941	0.000118752	-7.00259e-06	0.000112494	1.44711e-05	0.000112389	0.000117117	0.000108237		0.927054			0.000254959	0.000157366	0.00546638	9.18028e-05	3.45093e-05	0.0889742	3.4383e-05	0.0637631	0.765445					0.707008	0.000139783	197.71	962.779	58				0.706238	0.000253057
20	Dur03-Seq7-25um				0.000409913	0.000107202	5.98966e-06	0.000121612	0.00197682	0.00013781	6.41218e-06	0.000118239	-0.000100695	0.000133851	0.00063517	0.000117591	-7.37504e-06	0.000124734	1.4415e-05	0.000123775	0.000127645	0.000111399		0.922729			0.000252537	0.000160691	0.00544843	0.000104873	4.27604e-05	0.0885728	2.55586e-05	0.0634689	0.761859					0.707055	0.000166601	235.626	1029.83	58				0.706421	0.000238133
																																						Average	0.70719							Average	0.706421
																																						2 s.d.	0.000305212							2 s.d.	0.000390516
																																						2 s.d. ppm	431.584							2 s.d. ppm	552.809
01	Dur01-Seq1-13um				0.000442541	0.000140004	1.02379e-05	0.000131479	0.00213388	0.000154425	7.3594e-06	0.000115714	-0.000101511	0.000148227	0.000683583	0.00012079	4.80086e-07	0.000139407	2.86903e-05	0.000140739	0.000116863	0.000117827		0.237989			7.74895e-05	4.94127e-05	0.00143972	3.12788e-05	2.65311e-05	0.0228488	1.16376e-05	0.0163628	0.196417					0.706685	0.000483812	684.621	505.989	56				0.705943	0.000888362
02	Dur02-Seq1-13um				0.000446183	0.000111858	7.13228e-06	0.000125096	0.00215171	0.000141566	-4.47273e-06	0.00012752	-8.48313e-05	0.000140671	0.000682111	0.000141757	9.07387e-06	0.000127934	1.35853e-05	0.000136386	0.00011387	0.00010554		0.227842			7.65313e-05	5.60595e-05	0.00134316	3.34419e-05	-1.59277e-06	0.0218776	5.6675e-06	0.0156803	0.18804					0.70723	0.000486866	688.412	1276.5	57				0.70698	0.000879679
03	Dur03-Seq1-13um				0.000442469	0.000115753	1.21949e-05	0.000103765	0.00214404	0.000122817	-3.35668e-07	9.76883e-05	-0.000102942	0.000136276	0.000693687	0.00012177	5.74211e-07	0.000100478	2.19336e-05	0.000119207	0.000102373	9.2516e-05		0.22728			7.66075e-05	3.11259e-05	0.0013506	2.38649e-05	4.56746e-06	0.0218201	1.51117e-05	0.0156273	0.187583					0.706878	0.000446233	631.273	778.477	55				0.705773	0.000819931
04	Dur01-Seq2-13um				0.000438015	0.000117476	-1.64313e-06	0.000111156	0.00213368	0.000131767	1.3853e-05	0.000118	-9.87506e-05	0.000139749	0.000669922	0.000113189	3.42521e-06	0.000114155	1.68405e-05	0.000122975	0.000106844	0.000109833		0.223765			7.62936e-05	4.77214e-05	0.00134529	1.1793e-05	-9.48788e-06	0.0215038	5.35275e-06	0.0153824	0.184676					0.706535	0.000522186	739.08	293.152	56				0.705753	0.00088162
05	Dur02-Seq2-13um				0.000436945	0.000111275	2.63161e-06	0.000124521	0.00214542	0.00013131	1.1575e-05	9.23151e-05	-0.000110819	0.000131163	0.00067283	0.000113156	2.62101e-06	0.000128181	5.49396e-06	0.000103903	0.000104488	0.000123839		0.231302			7.47681e-05	4.08178e-05	0.00138845	2.65819e-05	2.3963e-05	0.0222246	1.99471e-05	0.0159184	0.190908					0.706798	0.000490287	693.673	665.433	56				0.705081	0.000795911
06	Dur03-Seq2-13um				0.000448688	0.000122634	-5.55477e-06	0.000111594	0.00213239	0.000158823	2.72851e-06	0.000103089	-9.0682e-05	0.000115952	0.000685573	0.000131596	8.62416e-06	0.000112356	8.11594e-06	0.000100832	0.000101202	0.000156836		0.228321			7.8824e-05	4.41654e-05	0.00136612	2.74687e-05	4.80995e-06	0.0219272	1.34548e-05	0.0157099	0.188449					0.707125	0.000525404	743.014	1128.92	57				0.705516	0.000787626
07	Dur01-Seq1-13um				0.000457173	0.00012443	1.57218e-05	0.000122547	0.00225942	0.000152205	3.95489e-06	0.000124416	-0.000102915	0.000117432	0.000729019	0.000131526	-2.91699e-06	0.00012363	1.65269e-05	0.000112023	0.000114357	9.85113e-05		0.247685			0.000183278	0.000121087	0.00154489	8.48804e-05	2.39905e-06	0.0237905	1.50888e-05	0.0170466	0.204422					0.707341	0.000445856	630.327	1434.09	57				0.706121	0.000785316
08	Dur02-Seq1-13um				0.000458659	0.000125809	1.25358e-05	0.000108556	0.00224451	0.000160255	5.27121e-07	0.000131775	-9.67979e-05	0.000134434	0.000722199	9.7918e-05	7.94058e-07	9.31562e-05	1.16764e-05	0.000110095	0.000116117	0.000115132		0.245374			0.000175408	0.000107697	0.00153324	8.01473e-05	5.97939e-06	0.0235631	1.43449e-05	0.0168978	0.202511					0.707726	0.000430135	607.77	1979.95	55				0.706635	0.000969407
09	Dur03-Seq1-13um				0.000457935	0.000110115	1.30772e-05	0.000110951	0.002223	0.00014936	5.4769e-06	0.000112907	-9.91439e-05	0.000139254	0.000715018	0.000104712	3.96763e-06	0.000125453	1.30466e-05	0.000113582	0.000114217	0.000141367		0.228513			0.00015392	9.77962e-05	0.00141482	6.44925e-05	1.00273e-05	0.0219419	1.94484e-05	0.0157305	0.188592					0.707328	0.000485597	686.523	1416.36	56				0.705499	0.000787264
10	Dur01-Seq3-13um				0.000435353	0.000113652	2.43035e-06	0.000121949	0.00211747	0.000133745	5.03442e-06	0.000111211	-9.21285e-05	0.000124768	0.000687285	0.000114143	3.78185e-06	0.000107033	1.50989e-05	0.000121185	9.45639e-05	0.000110289		0.268556			0.000129382	9.84791e-05	0.00163573	4.00291e-05	1.70146e-06	0.0257737	1.07307e-05	0.0184791	0.221676					0.707474	0.000499811	706.474	1621.83	59				0.706164	0.000862777
11	Dur02-Seq3-13um				0.000438407	0.000119738	1.56109e-05	0.000109613	0.00212217	0.000130589	-1.46937e-06	0.000138508	-0.000100624	0.000118144	0.000681798	0.000133094	-3.49543e-07	0.000104559	1.62174e-05	0.000102785	9.29513e-05	0.000105116		0.255392			0.000126073	7.66036e-05	0.00156	5.57889e-05	2.09401e-05	0.024517	2.53505e-05	0.0175709	0.210808					0.707454	0.00039727	561.549	1594.09	57				0.70553	0.000706144
12	Dur02-Seq3-13um				0.000430124	0.000121877	4.01786e-07	0.000132068	0.00212882	0.000145813	1.61446e-05	0.000124141	-0.000106969	0.00013122	0.000680785	8.42666e-05	8.79442e-06	9.78396e-05	1.66704e-05	0.000124596	8.89685e-05	0.000117616		0.253426			0.000135928	8.92144e-05	0.00153495	3.53172e-05	2.17314e-05	0.0243283	1.11827e-05	0.0174373	0.209186					0.707221	0.000441538	624.328	1264.39	58				0.706611	0.000732285
13	Dur01-Seq4-13um				0.00044542	0.000100366	7.7963e-06	9.39764e-05	0.00213828	0.000129519	8.56779e-07	0.000117722	-9.85062e-05	0.000115673	0.000679314	0.0001169	1.27692e-05	0.000111196	1.55725e-05	0.000126119	0.000104075	0.000109889		0.253018			0.000118573	7.40898e-05	0.00155136	5.78138e-05	1.64149e-05	0.0243014	8.77114e-06	0.0174137	0.208838					0.707361	0.0004446	628.533	1462.75	58				0.706168	0.000742065
14	Dur02-Seq4-13um				0.000440617	0.000113227	1.03845e-05	0.000112912	0.00213483	0.000148305	1.06417e-05	0.000145975	-0.0001051	0.000111607	0.000679781	0.000107818	-1.07697e-06	0.000110886	1.25034e-05	0.000110014	0.000104774	0.000118104		0.263619			0.000132702	7.74489e-05	0.00159272	4.87087e-05	2.32535e-05	0.0253154	1.42211e-05	0.0181413	0.217592					0.707512	0.000469902	664.16	1676.46	58				0.70611	0.0009523
15	Dur03-Seq4-13um				0.000440762	0.000113625	1.13337e-06	0.000119103	0.00211775	0.000156383	1.44984e-05	0.000115349	-0.000107102	0.000108737	0.000689841	0.00011264	-2.18291e-06	0.000117652	2.12249e-05	0.000121022	0.000100066	0.000111723		0.253606			0.000120501	8.77723e-05	0.0015526	3.82645e-05	1.71693e-06	0.0243456	1.54855e-05	0.0174435	0.209328					0.706907	0.000453055	640.898	819.232	55				0.705707	0.00102959
16	Dur01-Seq5-13um				0.000439461	0.000151276	1.0962e-05	0.000120019	0.00209594	0.000154893	9.95684e-06	0.000148741	-8.56269e-05	0.000130803	0.000663988	0.000122701	4.11319e-06	0.000118934	9.02112e-06	0.000121243	8.82512e-05	0.000101653		0.251486			0.000114296	8.13785e-05	0.00155436	5.48949e-05	-4.34494e-06	0.0241528	1.44431e-05	0.0173175	0.207587					0.707488	0.000407658	576.205	1642.42	56				0.70621	0.000776591
17	Dur02-Seq5-13um				0.000444441	0.000109843	7.36529e-06	9.41632e-05	0.00213232	0.000147301	1.93492e-06	0.00010338	-9.24668e-05	0.000116794	0.000680086	0.000116727	3.72889e-06	0.000129909	2.07846e-05	0.000118146	9.41937e-05	0.000129535		0.2498			0.000126623	9.26191e-05	0.00153021	5.40815e-05	7.15651e-06	0.0239879	1.53335e-05	0.0171884	0.206188					0.707219	0.000556498	786.882	1261.98	56				0.706169	0.000923255
18	Dur03-Seq5-13um				0.000444169	0.000132414	1.84463e-05	0.000122136	0.00214967	0.00014179	4.7344e-06	0.000142488	-0.000105091	0.000143592	0.000688214	0.00010383	-3.43397e-06	0.000108519	1.78167e-05	0.000139861	9.43582e-05	0.000127503		0.250435			0.000137399	6.93739e-05	0.00157425	5.87516e-05	1.60043e-05	0.0240632	2.14798e-05	0.0172423	0.20671					0.707673	0.000421154	595.124	1904.74	56				0.705911	0.000786056
19	Dur01-Seq6-13um				0.000476747	0.000134165	5.2876e-06	0.000111504	0.0022884	0.000223592	1.35072e-05	0.000136434	-8.76045e-05	0.000125621	0.000723413	0.000116281	8.26501e-06	0.000127703	1.04914e-05	0.000108454	9.62132e-05	0.000139327		0.216786			5.88396e-05	4.7049e-05	0.00129015	2.2984e-05	4.50517e-06	0.020798	9.09595e-06	0.0149003	0.178931					0.706811	0.000482155	682.155	684.33	56				0.706099	0.00102536
20	Dur02-Seq6-13um				0.000469352	0.000114733	1.25044e-05	0.000133538	0.0022762	0.000156971	-5.84426e-06	0.000100058	-9.7359e-05	0.000118188	0.000729315	0.000108942	5.51455e-06	0.000116323	1.55905e-05	0.000108547	0.000107427	0.000107291		0.219493			6.50626e-05	2.72559e-05	0.00129052	3.80028e-05	7.5345e-06	0.0210502	1.79485e-05	0.0150941	0.181152					0.707537	0.000533081	753.433	1711.24	56				0.705519	0.00101633
21	Dur03-Seq6-13um				0.000467204	0.00012631	1.20493e-05	0.00013465	0.00226123	0.000133855	8.62926e-06	0.000141796	-8.61559e-05	0.000131291	0.000728581	0.000121472	8.87404e-06	0.000114164	1.12788e-05	0.00012388	0.000100989	0.000137498		0.2205			7.44816e-05	3.04762e-05	0.00131764	2.30128e-05	4.39937e-06	0.0211674	1.65675e-05	0.0151708	0.181991					0.707276	0.000515885	729.398	1341.75	58				0.705753	0.00118129
22	Dur01-Seq1-13um				0.000421531	0.000118014	1.34086e-05	0.000132105	0.00205471	0.000132685	-4.10358e-07	9.8478e-05	-8.79568e-05	0.000119341	0.000668542	0.000116531	5.98655e-07	0.000123483	1.74677e-05	0.00014183	0.00015896	0.000113779		0.216914			8.35393e-05	3.48889e-05	0.00127952	1.55769e-05	6.64482e-06	0.0207905	7.95715e-06	0.0149052	0.178967					0.707061	0.000446848	631.979	1038.02	56				0.706196	0.000916133
23	Dur02-Seq1-13um				0.00044054	0.000112453	1.34061e-05	0.000160831	0.00206674	0.000126729	-2.12723e-06	0.000141558	-9.24919e-05	0.000124488	0.000676538	0.000136127	2.59167e-06	0.000105675	1.62805e-05	0.000105014	0.000154043	0.000130274		0.216289			6.49332e-05	3.2712e-05	0.00128846	1.59945e-05	1.26956e-08	0.0207321	1.36109e-05	0.0148522	0.178454					0.70648	0.000506134	716.416	215.512	56				0.705052	0.00116829
24	Dur03-Seq1-13um				0.000439819	0.000100519	2.99725e-06	0.000129046	0.00207139	0.000135278	-9.12732e-06	0.000108793	-9.62421e-05	0.000119605	0.000672314	0.00010894	-5.48765e-06	0.000110895	2.42654e-05	0.000129788	0.000151552	0.000111818		0.225168			6.21654e-05	5.23167e-05	0.00133018	2.95852e-05	1.45113e-05	0.0215769	1.95325e-05	0.015467	0.185795					0.707114	0.000562967	796.147	1113.48	57				0.704641	0.000868872
25	Dur01-Seq3-13um				0.000432792	0.000131483	1.27029e-05	0.000126932	0.00210371	0.000142572	-2.88454e-06	0.00010562	-9.83139e-05	0.000120517	0.000658508	0.000122505	-2.29731e-06	0.00011578	7.60176e-06	0.000108391	8.50776e-05	0.000119591		0.217669			6.71132e-05	4.42249e-05	0.00128932	3.0452e-05	9.66361e-06	0.0208758	1.56043e-05	0.0149732	0.179665					0.707514	0.000468924	662.777	1678.57	56				0.706194	0.000828107
26	Dur01-Seq5-13um				0.000416817	0.000108286	8.46089e-06	0.000125434	0.00204094	0.000151085	-7.26139e-07	0.000106985	-8.99339e-05	0.00012188	0.000647463	0.000129047	5.19123e-06	0.000115504	4.31614e-06	0.000117338	7.41371e-05	0.000114867		0.220027			6.74133e-05	4.28553e-05	0.00129844	3.21473e-05	3.13108e-06	0.0210911	-1.89667e-06	0.0151187	0.181624					0.706899	0.000601252	850.549	808.104	58				0.706833	0.000915751
27	Dur02-Seq5-13um				0.000422339	0.000123512	9.61292e-06	0.00011497	0.00203901	0.000139101	7.2974e-06	9.87191e-05	-9.25436e-05	0.000119	0.000643334	0.000116607	-5.53273e-06	0.000123617	1.12784e-05	0.000114596	7.37602e-05	0.000111744		0.227813			6.24457e-05	3.95383e-05	0.00134636	2.67075e-05	7.18325e-06	0.0218408	1.0227e-05	0.0156534	0.188051					0.706657	0.000472231	668.261	466.076	58				0.70558	0.000932305
28	Dur01-Seq5-13um				0.000422895	0.000132096	1.20393e-05	0.000123953	0.00203656	0.000145479	-2.32471e-07	0.000122009	-0.000101227	0.000121761	0.000650186	0.000108124	7.40629e-07	0.000123839	7.7075e-06	0.00011507	7.11745e-05	0.000115689		0.21626			6.48436e-05	3.01481e-05	0.00128174	2.36342e-05	1.64761e-05	0.0207346	5.45908e-06	0.0148632	0.178514					0.706986	0.000554783	784.715	931.85	55				0.706434	0.00103124
																																						Average	0.707153							Average	0.705935
																																						2 s.d.	0.000691978							2 s.d.	0.00106905
																																						2 s.d. ppm	978.541							2 s.d. ppm	1514.37
01	Dur01-Seq3-10um				0.000420828	0.000106949	7.53756e-06	0.000108622	0.00204461	0.000134011	4.69433e-06	0.000107926	-0.000107548	0.00011796	0.000663917	0.000119661	-3.66191e-06	0.000113082	2.07082e-05	0.000135301	0.00019563	0.00013542		0.118557			3.44299e-05	2.95361e-05	0.000695094	7.91827e-06	1.46868e-05	0.0113494	-3.09329e-06	0.0081449	0.0977084					0.70807	0.000954314	1347.77	2466.18	55				0.707104	0.00177274
02	Dur02-Seq3-10um				0.000417013	0.000125244	4.94687e-06	0.00012394	0.00204795	0.000141806	-2.45447e-06	0.000112822	-9.76878e-05	0.000121187	0.000657975	0.000115705	-3.74368e-06	0.000116458	1.1311e-05	0.000120354	0.00012783	0.00011874		0.118288			3.59028e-05	2.94167e-05	0.000697067	1.99941e-05	-3.46363e-06	0.0113368	3.64634e-06	0.00811837	0.0975537					0.705834	0.00110422	1564.42	-699.28	57				0.70482	0.00196587
03	Dur03-Seq3-10um				0.000413208	0.000118945	1.45232e-05	0.000130225	0.00204577	0.000133603	-6.14039e-08	0.000131444	-0.000100187	0.000126147	0.000660318	0.000109184	-1.62825e-06	0.000115933	1.11609e-05	0.000104528	0.000106297	0.000121497		0.115037			3.61864e-05	1.65509e-05	0.000668268	1.40771e-05	-2.90475e-06	0.0110105	4.68478e-07	0.00790078	0.0948906					0.707352	0.0012328	1742.83	1449.48	57				0.706028	0.00162389
04	Dur01-Seq4-10um				0.000419715	0.000129897	1.10667e-05	0.000131357	0.00204005	0.00015107	-1.87641e-06	0.000122321	-9.92705e-05	0.000125148	0.000651657	0.00012254	-1.76427e-06	0.000117014	6.58195e-06	0.000113983	9.26096e-05	0.000131095		0.119546			3.27186e-05	1.38359e-05	0.000701325	7.74811e-06	6.56076e-06	0.0114557	1.02093e-05	0.00822007	0.0986294					0.707736	0.000999779	1412.64	1993.61	55				0.705612	0.00250896
05	Dur02-Seq4-10um				0.000416481	0.000132434	1.24907e-05	0.000138434	0.00203954	0.000152843	-8.4801e-06	0.000108881	-9.62638e-05	0.000138539	0.000646085	0.00013023	2.26885e-07	0.000111287	4.37611e-06	0.000100523	8.753e-05	0.000124026		0.112686			3.30894e-05	1.20272e-05	0.000662404	1.52761e-05	1.54801e-06	0.0108019	-3.6071e-06	0.00774759	0.0929663					0.707961	0.00102142	1442.76	2311.5	58				0.706447	0.00188276
06	Dur03-Seq4-10um				0.000422885	0.000126072	1.26156e-05	0.000134676	0.00203929	0.000137424	2.68053e-06	0.000112459	-9.23263e-05	0.000122212	0.000646224	0.000117449	1.14783e-06	0.000129943	4.43052e-06	0.000113563	7.98669e-05	0.0001292		0.115786			2.79739e-05	2.21132e-05	0.000684018	9.06956e-06	1.07968e-07	0.011103	1.60562e-06	0.00795862	0.0955349					0.707065	0.000965121	1364.97	1043.24	56				0.707026	0.00202784
07	Dur01-Seq8-10um				0.000406658	0.000123974	6.1335e-06	0.000122565	0.0019658	0.000140253	1.1408e-05	0.000127195	-8.75899e-05	0.000125731	0.000621957	0.000109271	3.98281e-06	0.000111338	1.23421e-05	0.000110454	9.97658e-05	0.000118577		0.127192			4.76647e-05	1.40458e-05	0.000774894	2.62114e-05	8.80107e-06	0.0121958	-2.81871e-07	0.00874301	0.104937					0.707209	0.000876499	1239.38	1247.79	56				0.706016	0.00185989
08	Dur02-Seq8-10um				0.000408142	0.000119139	8.28304e-06	0.000113393	0.00198344	0.00013562	1.34092e-05	0.000115658	-8.96971e-05	0.000119338	0.000624918	0.000115665	-1.41407e-06	0.000122512	1.84276e-05	0.00011769	9.70849e-05	0.000109274		0.130292			3.99691e-05	2.92356e-05	0.000775034	1.69499e-05	4.91827e-07	0.0124904	7.2594e-06	0.00894923	0.107498					0.706941	0.000782188	1106.44	867.746	55				0.705132	0.0020334
09	Dur03-Seq8-10um				0.000409779	0.000123056	1.18328e-05	0.000116366	0.00198272	0.000143607	1.41857e-05	0.000107641	-9.24587e-05	0.000125255	0.000624866	0.000124205	5.91305e-06	0.000120842	1.7247e-05	0.000135677	9.11941e-05	0.000129404		0.127084			3.83545e-05	1.24907e-05	0.000749418	1.82122e-05	1.25168e-05	0.0121805	-6.53433e-06	0.00872873	0.104853					0.706626	0.000785545	1111.68	421.344	56				0.706859	0.00171922
10	Dur01-Seq7-10um				0.000413113	0.000120286	7.96107e-06	0.0001071	0.00201061	0.000144531	5.13887e-06	0.000111648	-9.89537e-05	0.000112162	0.000646004	0.000121939	4.83839e-07	0.000106282	2.38129e-05	0.000118198	0.000162412	0.000122608		0.112355			3.90373e-05	1.89125e-05	0.000670799	2.04901e-05	5.84235e-06	0.0107589	9.34233e-06	0.00771129	0.0926212					0.707331	0.0010217	1444.44	1419.68	56				0.704919	0.00157787
11	Dur02-Seq7-10um				0.000408692	0.000117745	1.03134e-05	0.000137477	0.00202103	0.000130932	6.60091e-06	0.0001101	-9.89091e-05	0.000125655	0.000642509	0.000122269	3.2559e-06	0.000111873	2.15144e-05	0.000115192	0.000123548	0.000126118		0.107013			3.11788e-05	1.17114e-05	0.00063363	1.40901e-05	7.31717e-06	0.010237	4.35132e-06	0.00734312	0.0882512					0.706641	0.00111271	1574.64	442.582	58				0.705412	0.0024664
12	Dur03-Seq7-10um				0.000408952	0.000125958	1.00704e-05	0.000126174	0.00202004	0.000146196	5.33405e-06	0.000117266	-9.60584e-05	0.000132456	0.000636344	0.00011422	8.246e-06	0.000119156	1.52149e-05	0.000115539	0.000109377	0.000122635		0.110167			4.53561e-05	2.47946e-05	0.000655047	1.8198e-05	7.35808e-06	0.0105599	-3.20366e-06	0.007558	0.090867					0.706109	0.000963427	1364.42	-309.859	57				0.705422	0.00211778
13	Dur01-Seq8-10um				0.000411396	0.000127636	1.02982e-05	0.000112297	0.00201864	0.000123166	1.43512e-05	0.000106966	-9.76334e-05	0.00012605	0.000639395	0.000115164	1.58583e-05	0.000122552	1.15217e-05	0.000118873	9.78239e-05	0.000116246		0.109444			3.88262e-05	2.13214e-05	0.000650817	1.19528e-05	9.52331e-06	0.0104847	-1.7148e-06	0.00751763	0.0902824					0.70673	0.00104274	1475.45	569.17	58				0.70742	0.00180321
14	Dur02-Seq8-10um				0.000409764	0.000111196	8.00077e-06	0.000110539	0.00202722	0.000137782	6.69202e-06	0.000113303	-8.94804e-05	0.000128024	0.000644005	0.000115587	6.17884e-06	0.000120357	1.12395e-05	0.000113816	8.76218e-05	0.000124262		0.108721			4.15163e-05	1.38868e-05	0.000637144	1.25461e-05	9.90925e-06	0.0104171	9.44035e-06	0.00746822	0.0896953					0.70706	0.00133011	1881.19	1035.98	56				0.704787	0.00201971
15	Dur03-Seq8-10um				0.00040437	0.000126559	4.2042e-06	0.000117106	0.00202337	0.000129555	1.33849e-05	0.000106208	-9.60486e-05	0.000128744	0.000642542	0.000125117	7.51442e-06	0.00010861	1.37926e-05	0.000123394	8.44075e-05	0.000123336		0.107661			5.19322e-05	2.7101e-05	0.000650667	1.08148e-05	3.01056e-06	0.0103116	1.18065e-07	0.00738948	0.0888257					0.706919	0.00101884	1441.24	836.953	56				0.706747	0.00207467
16	Dur01-Seq9-10um				0.00041665	0.00011606	7.72133e-06	0.000123937	0.00202463	0.000141727	1.28076e-05	0.000125173	-9.46237e-05	0.000130455	0.000640277	0.000110153	4.33951e-06	0.000129765	1.53019e-05	0.000130938	7.5027e-05	0.000130203		0.112817			4.25471e-05	3.33226e-05	0.000683948	1.56145e-05	4.05506e-06	0.010808	2.60751e-06	0.0077517	0.0930882					0.706978	0.000935016	1322.55	920.689	55				0.706192	0.00223784
17	Dur02-Seq9-10um				0.000412188	0.000117537	8.58299e-06	0.000124176	0.00203732	0.000144214	1.51616e-05	0.000120271	-0.000105596	0.00013063	0.000641038	0.000121711	-1.12269e-06	0.000127797	1.31541e-05	0.000104074	7.75773e-05	0.000116999		0.106855			3.89908e-05	1.93869e-05	0.000626704	7.6273e-06	8.24517e-06	0.0102359	5.92345e-06	0.00733096	0.0881608					0.70546	0.00118551	1680.48	-1228.6	57				0.703158	0.00221444
18	Dur03-Seq9-10um				0.000413547	0.000129429	5.37826e-06	0.000121702	0.00202994	0.00012791	1.38946e-05	0.000125545	-9.05173e-05	0.000113991	0.000643864	0.000121001	8.29712e-06	0.000107963	1.3308e-05	0.000110028	7.08128e-05	0.000113038		0.108442			4.78417e-05	3.19264e-05	0.000641785	1.11293e-05	-5.04214e-06	0.0103946	9.07657e-07	0.00744995	0.0894826					0.707158	0.00086107	1217.65	1175.37	54				0.706581	0.00178364
19	Dur01-Seq10-10um				0.000416508	0.000110717	1.16417e-05	0.000108895	0.0020391	0.000132795	1.26463e-05	0.000105023	-9.40108e-05	0.000110329	0.000639789	0.000119729	4.48621e-06	0.000116465	1.86793e-05	0.000111458	6.76613e-05	0.000123533		0.10844			3.89982e-05	2.29876e-05	0.000637026	4.85399e-06	6.044e-07	0.0103895	-1.45721e-06	0.00745088	0.0894794					0.707241	0.0009494	1342.4	1292.12	55				0.707394	0.00182085
20	Dur02-Seq10-10um				0.000418761	0.000137372	1.10758e-05	0.00012336	0.00203442	0.000147502	5.9974e-06	0.00012273	-9.68394e-05	0.000134072	0.000638435	0.000103998	8.31881e-06	0.000108236	1.72511e-05	0.000122318	6.83183e-05	0.000126731		0.107463			3.51924e-05	3.10003e-05	0.000633156	1.35093e-05	3.20921e-06	0.0103019	-1.53412e-06	0.00738375	0.0886763					0.707386	0.00114373	1616.84	1497.8	56				0.707593	0.00194702
21	Dur03-Seq10-10um				0.000423125	0.000109971	1.10709e-05	0.000128656	0.00202806	0.000151108	1.39045e-05	0.000119647	-0.000105734	0.000141235	0.000639526	0.000115259	5.31526e-06	0.000117736	1.89159e-05	9.71632e-05	6.5241e-05	0.000118318		0.108931			2.88248e-05	2.51495e-05	0.000661269	4.19557e-06	1.25585e-05	0.0104546	3.89659e-06	0.00748973	0.0898925					0.706876	0.00095067	1344.89	775.36	54				0.70632	0.00222771
																																						Average	0.706985							Average	0.706047
																																						2 s.d.	0.00126598							2 s.d.	0.00220838
																																						2 s.d. ppm	1790.68							2 s.d. ppm	3127.8
01	Ipira01-Seq7-50um				0.000800622	0.000136493	0.000197577	0.000108927	0.0161793	0.00175994	0.00012758	0.000129515	-5.74105e-05	0.000110798	0.227198	0.0288337	6.168e-05	0.000114878	0.163242	0.0208091	1.9476	0.247933		2.35844			0.000383629	0.000186797	0.0141795	0.000127555	6.59073e-05	0.22652	5.57642e-05	0.163199	1.94719					0.71108	8.43848e-05	118.671	834.741	58				0.710589	0.000109954
02	Ipira02-Seq7-50um				0.000916955	0.000237142	0.000264755	0.000150421	0.0177884	0.00250036	0.000179735	0.000133067	-4.87162e-05	0.000169193	0.251362	0.0381975	7.04285e-05	0.000131054	0.180633	0.0275375	2.15509	0.32802		2.6097			0.000494571	0.000255014	0.0157847	0.000162404	7.90556e-05	0.250691	6.178e-05	0.180593	2.1547					0.711014	6.74202e-05	94.8227	741.73	56				0.710584	0.000104845
03	Ipira03-Seq7-50um				0.00078497	0.000144268	0.000173298	0.000116519	0.0162652	0.00187645	0.000126282	0.000181171	-5.5151e-05	0.000130366	0.228794	0.0305551	5.10646e-05	0.000119916	0.164369	0.0220842	1.96134	0.262947		2.37508			0.000365848	0.000164578	0.0142553	0.000122222	4.41842e-05	0.228115	4.55356e-05	0.164318	1.96098					0.710936	9.1321e-05	128.452	632.617	56				0.710558	0.000113981
04	Ipira01-Seq8-50um				0.000788673	0.000132881	0.000190246	0.00013113	0.0163174	0.00134642	0.000129292	0.000116705	-6.77744e-05	0.000125249	0.229495	0.0222149	4.96488e-05	0.000111855	0.16489	0.0161146	1.96719	0.191507		2.38216			0.000379049	0.000181174	0.0143155	0.000130573	5.35728e-05	0.228822	4.25916e-05	0.164844	1.96682					0.711003	8.97043e-05	126.166	726.215	56				0.710661	0.000119474
05	Ipira01-Seq8-50um				0.000783185	0.000137381	0.000187561	0.000138374	0.0162224	0.00155889	0.000118188	0.000121632	-6.16306e-05	0.000131195	0.227894	0.02484	5.43889e-05	0.000130944	0.163719	0.0179565	1.95337	0.213728		2.36543			0.000366411	0.000180891	0.0142252	0.000121473	5.66869e-05	0.227224	4.67694e-05	0.163672	1.95302					0.710962	0.00011022	155.029	669.23	58				0.710604	0.000135298
06	Ipira03-Seq8-50um				0.000852675	0.000207532	0.000227741	0.000159609	0.0173152	0.00222661	0.000147491	0.00012254	-4.65246e-05	0.00013468	0.244655	0.0339145	6.35808e-05	0.000122865	0.175798	0.0243896	2.09752	0.291834		2.53998			0.000429327	0.000215655	0.0153124	0.000140964	6.91183e-05	0.243982	5.95187e-05	0.175755	2.09718					0.710999	7.51289e-05	105.667	720.968	58				0.710525	9.55487e-05
07	Ipira01-Seq9-50um				0.000853456	0.00017251	0.00022569	0.00014096	0.0177016	0.00308581	0.000154312	0.00012965	-4.30547e-05	0.00013798	0.250929	0.0480656	6.02329e-05	0.000130432	0.180331	0.0345174	2.15162	0.414278		2.6055			0.000439874	0.00021974	0.015684	0.000152298	5.96524e-05	0.250257	5.86441e-05	0.180293	2.15127					0.710984	8.25557e-05	116.115	698.865	57				0.710564	0.000110644
08	Ipira02-Seq9-50um				0.000817689	0.0001621	0.000205343	0.000135156	0.0174351	0.00316473	0.000134734	0.000114099	-5.8307e-05	0.000118351	0.24688	0.0500779	5.98207e-05	0.000117328	0.177399	0.0359987	2.11627	0.430858		2.56269			0.000403353	0.00021083	0.0154273	0.00014284	5.78591e-05	0.246222	6.00355e-05	0.177358	2.11592					0.710979	9.09665e-05	127.945	692.999	56				0.710539	0.000109487
09	Ipira03-Seq9-50um				0.000828605	0.000141729	0.000209149	0.000116505	0.0174122	0.00284073	0.000140851	0.000134678	-4.11333e-05	0.000127495	0.246868	0.0445271	5.88701e-05	9.61668e-05	0.17739	0.0319445	2.11591	0.382556		2.56225			0.00040797	0.000208125	0.0153981	0.000127298	5.77796e-05	0.246195	5.61334e-05	0.177348	2.11557					0.711062	9.38227e-05	131.947	808.914	57				0.710643	0.000112058
10	Ipira01-Seq1-50um				0.000912071	0.000161498	0.000254523	0.000140278	0.0163164	0.00405165	0.000160728	0.000125346	-3.40408e-05	0.000144791	0.227871	0.0650921	7.47799e-05	0.000128148	0.163727	0.0469101	1.95418	0.559551		2.36641			0.000480252	0.000248945	0.0142306	0.00017508	6.57266e-05	0.227146	6.70084e-05	0.163659	1.95356					0.71093	8.12287e-05	114.257	623.357	58				0.710406	0.000105835
11	Ipira02-Seq1-50um				0.000886781	0.000226085	0.000255186	0.000181639	0.0162402	0.00336759	0.0001494	0.000137819	-2.76582e-05	0.00012205	0.226753	0.0523053	5.85964e-05	0.000126955	0.162914	0.0377293	1.94457	0.449305		2.35477			0.000455217	0.000245147	0.0141523	0.000163532	7.09201e-05	0.226026	5.40156e-05	0.162859	1.94404					0.710941	8.18065e-05	115.068	638.423	58				0.710508	0.000122617
12	Ipira03-Seq1-50um				0.000904749	0.00015281	0.000261937	0.000129917	0.0160125	0.00318416	0.000160874	0.000130425	-3.60278e-05	0.000127154	0.222833	0.0508556	6.23053e-05	0.000141999	0.160105	0.036632	1.91076	0.436542		2.31383			0.000468134	0.00025419	0.0139308	0.000171908	6.93406e-05	0.222116	6.18149e-05	0.160047	1.91028					0.710967	8.67191e-05	121.973	675.841	59				0.710478	0.000116546
13	Ipira01-Seq2-50um				0.000898219	0.000144088	0.000251631	0.000162563	0.0157135	0.0019322	0.000163963	0.00010872	-2.96508e-05	0.000126562	0.217936	0.0307408	5.83421e-05	0.000126557	0.156594	0.0221895	1.86879	0.263737		2.263			0.000463506	0.000242954	0.013639	0.00017595	7.30891e-05	0.217226	6.53487e-05	0.156538	1.86832					0.711057	6.91781e-05	97.289	802.689	58				0.710474	8.51785e-05
14	Ipira02-Seq2-50um				0.000842909	0.000209373	0.000213939	0.000142505	0.0156313	0.00295469	0.00013366	0.000119641	-4.88845e-05	0.000117077	0.217774	0.0463775	5.96352e-05	0.000104788	0.156454	0.033521	1.86673	0.399419		2.26051			0.000417086	0.00020096	0.0135436	0.000135829	5.54088e-05	0.217069	6.35725e-05	0.15641	1.86631					0.711112	9.73449e-05	136.891	879.54	57				0.710561	0.000103813
15	Ipira03-Seq2-50um				0.000906875	0.000161149	0.000251127	0.000156429	0.0163738	0.00131454	0.000154137	0.000105364	-3.34368e-05	0.000124876	0.228472	0.0208104	6.37424e-05	0.000124238	0.164175	0.0150364	1.95954	0.1788		2.3729			0.000476574	0.000238085	0.0142824	0.000162812	7.2992e-05	0.227768	5.81376e-05	0.164131	1.95915					0.710993	7.58338e-05	106.659	711.727	58				0.710532	9.97386e-05
16	Ipira01-Seq1-50um				0.000856371	0.000166977	0.00024254	0.000136514	0.0155091	0.00175654	0.000161807	0.00011947	-2.47906e-05	0.000128386	0.215926	0.0286409	5.45951e-05	0.000133247	0.155188	0.0206689	1.85234	0.246742		2.24308			0.000443091	0.000222471	0.0135106	0.000161453	5.99326e-05	0.215291	4.59972e-05	0.155169	1.85217					0.711079	8.59016e-05	120.805	833.833	57				0.710658	0.000125985
17	Ipira02-Seq1-50um				0.000895614	0.00024242	0.000264897	0.000166493	0.01577	0.0049716	0.00017397	0.000118145	-2.32797e-06	0.000126306	0.220017	0.0788456	7.18037e-05	0.000139053	0.158139	0.0568444	1.88731	0.679723		2.28544			0.000482426	0.000256358	0.0137792	0.000169595	8.57034e-05	0.219372	6.7643e-05	0.15812	1.88708					0.711187	9.93976e-05	139.763	985.592	56				0.710593	0.000120648
18	Ipira03-Seq1-50um				0.000891995	0.000179337	0.000272805	0.000125472	0.0157864	0.00398903	0.000175175	0.000122966	-1.31941e-05	0.000119099	0.220045	0.0636092	6.79293e-05	0.000131641	0.158148	0.045831	1.88777	0.547326		2.28599			0.000481475	0.000256403	0.0138029	0.000178934	6.65389e-05	0.2194	6.57271e-05	0.158118	1.88751					0.71104	7.60439e-05	106.947	777.801	56				0.710492	0.000130429
19	Ipira01-Seq2-50um				0.000927865	0.000164875	0.000295688	0.000108186	0.0163953	0.00372406	0.000177424	0.000110628	-3.06882e-06	0.000106578	0.229599	0.0597894	6.51805e-05	0.00011387	0.16504	0.0430504	1.97034	0.514026		2.38598			0.00051696	0.000284255	0.0144118	0.000182563	8.00847e-05	0.22896	6.61992e-05	0.165009	1.97012					0.710957	6.78291e-05	95.4053	661.524	56				0.710396	0.000103332
20	Ipira02-Seq2-50um				0.000888056	0.000158946	0.000262475	0.000143405	0.0158265	0.00276162	0.00015847	0.000130856	-1.51295e-05	0.000118187	0.220939	0.0455207	6.48769e-05	0.000114541	0.15881	0.0327555	1.89566	0.391087		2.29554			0.000475894	0.000247952	0.0138521	0.000165453	7.19506e-05	0.220297	6.06306e-05	0.158775	1.89542					0.711067	9.91405e-05	139.425	816.351	57				0.710556	0.000109839
21	Ipira03-Seq2-50um				0.000864714	0.000141944	0.000266203	0.000122913	0.015725	0.00314822	0.000155623	9.71394e-05	-1.5799e-05	0.000120175	0.219473	0.0506593	6.32484e-05	0.000117922	0.157736	0.0366125	1.88314	0.436591		2.28039			0.000460238	0.000249885	0.0137442	0.000156969	7.03902e-05	0.218831	5.88717e-05	0.157703	1.88291					0.71091	7.57388e-05	106.538	595.912	57				0.710465	9.56746e-05
																																						Average	0.711012							Average	0.710542
																																						2 s.d.	0.000138592							2 s.d.	0.000146877
																																						2 s.d. ppm	194.922							2 s.d. ppm	206.711
01	Ipira01-Seq4-25um				0.00057202	0.000134212	7.42866e-05	0.00010015	0.00612769	0.00161132	0.000105483	0.000107416	-7.54003e-05	0.000123799	0.0643279	0.0256829	2.39074e-05	0.000117497	0.0458716	0.0185098	0.547523	0.220833		0.663022			0.000136013	6.93997e-05	0.00401753	3.54692e-05	2.79735e-05	0.0636513	1.16025e-05	0.0458512	0.547362					0.710838	0.000195828	275.49	493.51	57				0.710418	0.000291187
02	Ipira02-Seq4-25um				0.000562548	0.000125955	7.03662e-05	0.000135649	0.00615359	0.00170038	0.0001039	0.000118668	-7.17109e-05	0.000150487	0.0652349	0.0269104	1.77875e-05	0.000116588	0.0465323	0.0193769	0.555279	0.23124		0.672413			0.000134873	5.3555e-05	0.00406195	4.25673e-05	2.9613e-05	0.0645636	2.00967e-05	0.0465109	0.555125					0.710972	0.000186727	262.636	682.581	57				0.710361	0.000306348
03	Ipira03-Seq4-25um				0.000564003	0.000137734	5.83613e-05	0.000112615	0.00617917	0.00174894	7.64e-05	0.000161093	-9.1345e-05	0.000116682	0.0656753	0.0279838	2.20008e-05	0.000112459	0.0468456	0.0201745	0.559045	0.240519		0.676974			0.000135211	6.0238e-05	0.00407779	2.40676e-05	-3.10907e-06	0.0649937	2.40389e-05	0.0468245	0.558878					0.710843	0.000167247	235.279	500.646	58				0.710074	0.000277095
04	Ipira01-Seq5-25um				0.000561074	0.000128669	7.07946e-05	0.000140848	0.00615574	0.00173785	5.58143e-05	9.59752e-05	-8.9147e-05	0.000120198	0.0653153	0.0274585	1.8405e-05	0.000140578	0.0465826	0.019768	0.556003	0.235941		0.67329			0.000135967	6.24568e-05	0.00407213	4.52698e-05	9.9525e-06	0.0646371	2.27534e-05	0.0465593	0.555831					0.710816	0.000217927	306.587	462.827	56				0.710188	0.000406364
05	Ipira02-Seq5-25um				0.000564783	0.000113078	8.1476e-05	0.000110536	0.00617521	0.00175671	5.82126e-05	0.000110915	-7.74087e-05	0.000118777	0.0655741	0.0282323	1.68549e-05	0.000111182	0.0467759	0.020338	0.558251	0.242819		0.676012			0.000139675	7.31382e-05	0.0040916	4.76682e-05	2.16907e-05	0.064896	2.12033e-05	0.0467526	0.558079					0.710906	0.000212244	298.554	590.396	58				0.710291	0.000340966
06	Ipira03-Seq5-25um				0.000562875	0.00012492	7.45525e-05	0.000116478	0.00614155	0.00166515	5.1149e-05	0.000125149	-8.54186e-05	0.000114339	0.0651429	0.0265592	2.02578e-05	0.000107384	0.0464661	0.0191604	0.554405	0.22838		0.671355			0.000147744	6.75413e-05	0.00406159	4.31175e-05	1.17317e-05	0.0644674	2.07682e-05	0.0464449	0.554247					0.71099	0.000210328	295.824	708.306	60				0.710297	0.000308886
07	Ipira01-Seq6-25um				0.000567422	0.000102899	7.09273e-05	0.000126773	0.00612514	0.00167362	5.62132e-05	0.000107479	-7.60343e-05	0.00011463	0.0650201	0.0268523	1.7902e-05	0.000127296	0.0463763	0.0193362	0.553473	0.230472		0.670226			0.000136349	5.92973e-05	0.00404478	5.00893e-05	2.21823e-05	0.0643513	1.43735e-05	0.0463613	0.553304					0.710931	0.000194227	273.201	624.826	57				0.710512	0.000362347
08	Ipira02-Seq6-25um				0.000562611	0.000158255	8.25886e-05	0.000110758	0.00613146	0.0017169	4.45468e-05	0.000124304	-8.27819e-05	0.000139269	0.0650613	0.0279044	1.90337e-05	0.000124793	0.046409	0.0200524	0.553789	0.239534		0.670609			0.000136169	6.81585e-05	0.00404527	3.30622e-05	6.93488e-06	0.0644012	6.98889e-06	0.0463916	0.553632					0.711006	0.000195866	275.477	730.451	57				0.710828	0.000327352
09	Ipira03-Seq6-25um				0.000569465	0.000118866	7.5211e-05	0.000117368	0.00616981	0.00158289	5.37266e-05	0.000123992	-8.65477e-05	0.000146447	0.0645311	0.0263563	1.30106e-05	0.000136401	0.0460202	0.0190049	0.549096	0.22676		0.664926			0.000139982	7.1498e-05	0.0040638	4.02412e-05	7.36278e-06	0.06387	1.24049e-05	0.0460056	0.548933					0.711031	0.00023141	325.457	765.154	59				0.710525	0.000308325
10	Ipira01-Seq3-25um				0.000606054	0.000159208	0.000112876	0.000118983	0.00598941	0.00200048	5.90873e-05	0.000145797	-5.19863e-05	0.000134049	0.0618506	0.0317461	3.18968e-05	0.000120682	0.0441211	0.0228887	0.526551	0.272844		0.637625			0.00016863	9.49967e-05	0.00388122	7.13399e-05	4.02067e-05	0.061187	2.60232e-05	0.0441092	0.526446					0.711167	0.000273567	384.674	956.693	60				0.71021	0.000349441
11	Ipira02-Seq3-25um				0.00060424	0.000171022	0.000100546	0.000129402	0.00599237	0.00197859	6.04954e-05	0.000124938	-6.44855e-05	0.000111347	0.0623912	0.0315443	2.88053e-05	0.000119522	0.0445045	0.0227359	0.531161	0.271554		0.643207			0.000173929	8.68782e-05	0.00389727	7.33773e-05	2.61196e-05	0.0617267	2.31978e-05	0.0444929	0.531052					0.711189	0.000182826	257.071	987.754	56				0.710295	0.000333681
12	Ipira03-Seq3-25um				0.000606432	0.000139323	0.000108078	0.000130222	0.00596226	0.00197222	4.96394e-05	0.000112426	-6.26943e-05	0.000110469	0.061849	0.0312139	3.17116e-05	0.000131989	0.0441123	0.0224987	0.526551	0.268621		0.637625			0.000173432	9.7746e-05	0.00387469	6.23481e-05	2.35802e-05	0.0611869	2.42475e-05	0.0440994	0.526445					0.711021	0.000189352	266.31	751.379	58				0.710247	0.000358047
13	Ipira01-Seq8-25um				0.000580366	0.000154616	9.68524e-05	0.000112517	0.00586109	0.00180109	5.44701e-05	9.49402e-05	-7.2746e-05	0.000128815	0.0604287	0.0289505	1.87147e-05	0.000120739	0.0430901	0.0208691	0.514372	0.249104		0.622877			0.000151801	8.33534e-05	0.00376901	6.55246e-05	2.01975e-05	0.0597679	9.32901e-06	0.0430756	0.514277					0.710906	0.000231095	325.071	589.075	58				0.710541	0.000325602
14	Ipira02-Seq8-25um				0.00057826	0.000125862	9.50143e-05	0.000138089	0.00584718	0.00174375	5.31582e-05	0.000106303	-7.37216e-05	0.000122856	0.060092	0.027735	1.90339e-05	0.000109179	0.0428461	0.0199974	0.511389	0.23865		0.619265			0.000143683	8.21556e-05	0.00375748	5.0212e-05	2.33341e-05	0.0594325	1.55484e-05	0.0428328	0.511293					0.711151	0.000209703	294.879	934.445	57				0.710559	0.000329841
15	Ipira03-Seq8-25um				0.00058234	0.000131723	9.75011e-05	0.000122214	0.00589307	0.00174955	0.000104788	0.000121405	-6.3632e-05	0.000139994	0.0610263	0.027951	2.81131e-05	0.000113213	0.0435086	0.0201167	0.519464	0.240374		0.629044			0.000147432	8.14801e-05	0.00380594	9.58098e-05	3.03478e-05	0.060362	2.96849e-05	0.0434976	0.519367					0.710876	0.00022515	316.723	546.922	59				0.709763	0.000268359
16	Ipira01-Seq1-25um				0.000537095	0.000135459	8.40242e-05	0.000127542	0.00572209	0.0016071	5.5001e-05	0.000117022	-6.91209e-05	0.000126526	0.0598771	0.0260617	1.90677e-05	0.000106949	0.0426981	0.0187605	0.509736	0.224031		0.617263			0.000129055	7.32522e-05	0.00373044	4.81821e-05	3.33095e-05	0.0592481	7.56583e-06	0.0426833	0.509659					0.710777	0.000201155	283.007	407.964	58				0.710472	0.000300024
17	Ipira02-Seq1-25um				0.000537912	0.000113454	8.11824e-05	0.000139592	0.00568843	0.00134821	5.36185e-05	0.000108744	-7.29835e-05	0.00013141	0.0593854	0.0220151	1.98169e-05	0.00010357	0.0423521	0.015864	0.505498	0.18919		0.612132			0.000124008	7.26671e-05	0.00369907	4.63707e-05	2.08674e-05	0.0587556	1.59299e-05	0.0423387	0.505411					0.71092	0.000246544	346.796	609.162	59				0.710433	0.000364843
18	Ipira03-Seq1-25um				0.000546516	0.000134889	9.01501e-05	9.8715e-05	0.00576413	0.00156143	4.76107e-05	0.000117263	-7.69015e-05	0.000134384	0.0605344	0.025062	2.52763e-05	0.000116393	0.0431842	0.0180124	0.515366	0.215155		0.624081			0.000140105	8.04451e-05	0.00377688	4.33429e-05	1.80328e-05	0.0599096	2.53778e-05	0.0431786	0.515275					0.711191	0.000197794	278.117	990.554	57				0.710471	0.00035835
19	Ipira01-Seq2-25um				0.000537243	0.000104205	8.54859e-05	0.0001283	0.00573423	0.00160072	5.37383e-05	0.000112992	-7.26915e-05	0.000113929	0.0601317	0.0259419	2.14771e-05	0.000121334	0.0428822	0.0186405	0.511782	0.22263		0.619741			0.000130322	7.15482e-05	0.00374707	4.45855e-05	1.11343e-05	0.0595053	1.69641e-05	0.0428758	0.511699					0.7111	0.000177673	249.856	862.94	58				0.710515	0.000366926
20	Ipira02-Seq2-25um				0.000539996	0.000120042	7.4576e-05	0.000116768	0.00576814	0.00153132	5.38142e-05	0.000108778	-8.42259e-05	0.000135907	0.0607754	0.0247306	2.10058e-05	0.000113703	0.0433589	0.0178092	0.517493	0.212355		0.626657			0.000132444	6.4026e-05	0.00378234	5.19206e-05	9.86764e-06	0.0601523	1.27812e-05	0.0433497	0.517404					0.711014	0.000177951	250.279	741.299	57				0.710514	0.000309185
21	Ipira03-Seq2-25um				0.00055133	0.0001299	8.8586e-05	0.000151302	0.00596215	0.00168163	6.00132e-05	0.000110533	-7.80134e-05	0.000123121	0.063692	0.0267399	2.70801e-05	0.000106742	0.0454448	0.0192746	0.542404	0.230271		0.656822			0.000146276	6.96733e-05	0.00397824	4.9036e-05	3.00809e-05	0.0630684	1.50363e-05	0.0454287	0.542309					0.71079	0.00020344	286.217	426.633	59				0.710264	0.000298484
																																						Average	0.710973							Average	0.71037
																																						2 s.d.	0.000261904							2 s.d.	0.000434932
																																						2 s.d. ppm	368.374							2 s.d. ppm	612.26
01	Ipira01-Seq1-13um				0.000480401	0.000120519	2.33627e-05	0.000121248	0.00313525	0.000897464	1.93392e-05	0.000109179	-9.36245e-05	0.000108959	0.0162239	0.0143165	4.86343e-06	0.000130236	0.0112097	0.0103254	0.133787	0.123066		0.162008			2.92158e-05	1.14386e-05	0.000973272	2.18963e-05	1.4986e-05	0.0155338	-1.36555e-06	0.0111897	0.133664					0.710804	0.000769722	1082.89	445.861	56				0.710027	0.00137223
02	Ipira02-Seq1-13um				0.000476306	0.00014237	2.41619e-05	0.000115581	0.00312588	0.000942322	2.09393e-05	0.000117793	-0.000100104	0.00012069	0.0160762	0.0146672	6.77366e-06	0.000115909	0.0111034	0.0105436	0.13245	0.126055		0.16039			3.05921e-05	9.11074e-06	0.00097161	1.98714e-05	-4.26755e-06	0.0153897	4.77138e-06	0.0110916	0.132337					0.71115	0.000684357	962.325	932.761	56				0.709926	0.00123313
03	Ipira03-Seq1-13um				0.000476868	0.000129995	1.93848e-05	0.000135917	0.00313402	0.000858937	1.70594e-05	0.000100508	-8.54485e-05	0.000134369	0.0163359	0.0141072	3.31351e-06	0.000108857	0.0112796	0.0101473	0.134695	0.121225		0.163108			3.7154e-05	1.63336e-05	0.000986221	1.41983e-05	1.64914e-05	0.0156526	5.97733e-06	0.0112729	0.134579					0.711072	0.000682532	959.864	822.955	56				0.710115	0.00115274
04	Ipira01-Seq2-13um				0.000483616	0.000134572	3.20004e-05	0.000115384	0.00310835	0.000897611	2.24146e-05	0.000127689	-9.95383e-05	0.000119167	0.0158395	0.0141271	-1.1377e-06	0.000114303	0.010941	0.0101701	0.130558	0.121502		0.158099			5.26379e-05	2.26834e-05	0.000942374	1.36393e-05	2.90024e-06	0.0151555	-8.35964e-06	0.0109181	0.130449					0.710823	0.000859362	1208.97	472.829	57				0.71137	0.00128836
05	Ipira02-Seq2-13um				0.000478687	0.000118891	2.54234e-05	0.000137	0.00311744	0.000896386	1.75987e-05	0.000126151	-9.319e-05	0.000117253	0.0159797	0.0140702	8.45164e-06	0.000129731	0.0110377	0.0101493	0.131626	0.12092		0.159392			4.1234e-05	1.67186e-05	0.00097591	1.3948e-05	1.06358e-06	0.0153015	7.29776e-06	0.011023	0.131518					0.71082	0.000609268	857.134	468.289	57				0.709766	0.00160881
06	Ipira03-Seq2-13um				0.000479267	0.000132641	3.33458e-05	0.000117908	0.00314666	0.000983455	2.07822e-05	0.000118125	-9.27789e-05	0.000141219	0.0165413	0.0153946	1.16332e-05	8.80535e-05	0.0114392	0.0110976	0.136471	0.132335		0.16526			3.83388e-05	2.75664e-05	0.00101385	2.39077e-05	2.51382e-06	0.0158548	1.72793e-05	0.0114228	0.136363					0.710693	0.000652534	918.167	289.347	55				0.708612	0.0010134
07	Ipira01-Seq3-13um				0.00047171	0.000129625	2.36828e-05	0.000124168	0.00315552	0.000874141	1.85518e-05	0.000111003	-0.00010393	0.000111744	0.0166959	0.0138928	9.44461e-06	0.000127696	0.0115508	0.00999786	0.137818	0.119321		0.166891			3.43311e-05	1.04186e-05	0.00102387	3.33823e-05	2.29603e-06	0.0160191	2.98233e-06	0.0115437	0.137725					0.711233	0.000651845	916.5	1049.53	56				0.710562	0.00118693
08	Ipira02-Seq3-13um				0.000467975	0.000118766	2.4561e-05	9.87278e-05	0.00311552	0.000939903	1.51364e-05	0.000122682	-9.81718e-05	0.000122565	0.0161117	0.0147499	5.61004e-06	0.00013555	0.011127	0.0106175	0.132815	0.126816		0.160831			2.28166e-05	2.21088e-05	0.000984664	1.50405e-05	2.1759e-05	0.0154414	6.41898e-07	0.0111086	0.132717					0.709867	0.000782899	1102.88	-872.226	59				0.709622	0.00139398
09	Ipira03-Seq3-13um				0.000465521	0.00011351	2.64296e-05	0.000133677	0.00312503	0.000879987	1.59153e-05	0.000100802	-0.000101065	0.000108563	0.0162713	0.0141089	9.06601e-06	0.000123629	0.0112414	0.0101745	0.134165	0.121337		0.162467			2.81427e-05	1.31653e-05	0.000993373	3.07458e-05	5.1614e-06	0.0155946	2.60374e-06	0.0112343	0.134072					0.711001	0.000698695	982.691	723.664	56				0.709996	0.00153847
10	Ipira01-Seq1-13um				0.000473981	0.000113524	2.51845e-05	0.000126688	0.00316904	0.0010617	9.35401e-06	0.000104007	-9.19471e-05	0.000129567	0.0165805	0.0168415	4.81235e-06	0.000105708	0.0114769	0.0120915	0.136992	0.144808		0.165891			3.5223e-05	1.12312e-05	0.000996709	2.51402e-05	6.45665e-06	0.0158989	4.73673e-06	0.011452	0.136829					0.710486	0.00079265	1115.64	-1.71763	58				0.709649	0.00130975
11	Ipira02-Seq1-13um				0.000470578	0.000127511	2.79947e-05	0.000128895	0.00314168	0.00102444	1.66473e-05	0.000112492	-9.97438e-05	0.000112096	0.0163136	0.0161939	8.6353e-06	0.000113078	0.0112874	0.0116917	0.134697	0.139457		0.163111			3.73154e-05	1.15612e-05	0.000989255	1.41318e-05	9.55551e-06	0.0156118	1.10374e-05	0.011265	0.134561					0.711074	0.000716944	1008.25	826.803	56				0.709383	0.00115687
12	Ipira03-Seq1-13um				0.000475001	0.000113328	3.69264e-05	0.000106074	0.0030925	0.000906729	2.20304e-05	0.000115404	-9.12066e-05	0.00012625	0.0156029	0.0143375	1.14938e-06	0.000120703	0.0107767	0.0103342	0.128539	0.123342		0.155654			3.15035e-05	2.62415e-05	0.000934363	8.55297e-06	2.50221e-06	0.0149149	-7.07463e-06	0.0107621	0.128417					0.711461	0.000765572	1076.06	1370.57	57				0.712698	0.00126695
13	Ipira01-Seq2-13um				0.000476101	0.000127215	3.21479e-05	0.000112141	0.00312365	0.000915475	1.62937e-05	0.000118713	-8.66396e-05	0.000118309	0.016195	0.0145098	5.21426e-06	0.000122855	0.0111889	0.0104465	0.133463	0.124747		0.161616			3.3473e-05	2.41384e-05	0.000973844	7.99744e-06	7.11025e-06	0.0155035	4.91216e-07	0.0111751	0.133347					0.711192	0.000785702	1104.77	992.17	57				0.71039	0.00147049
14	Ipira02-Seq2-13um				0.000477207	0.000135496	3.20838e-05	0.000122356	0.0031263	0.000998022	6.23676e-06	0.000115226	-9.41015e-05	0.000134151	0.016023	0.0155019	6.59064e-06	0.000100448	0.0110781	0.0111571	0.132118	0.133285		0.159987			4.18042e-05	1.55527e-05	0.000982703	3.57549e-06	7.82961e-06	0.0153316	1.10119e-05	0.011055	0.132015					0.711695	0.000739516	1039.09	1699.77	56				0.709771	0.00113966
15	Ipira03-Seq2-13um				0.000476183	0.000132511	3.3579e-05	0.000117427	0.0031051	0.000876411	6.62506e-06	0.00011751	-9.40522e-05	0.000130828	0.015684	0.0136999	6.61236e-06	0.000103909	0.0108376	0.00991332	0.129254	0.11782		0.15652			4.62871e-05	2.83483e-05	0.000961185	1.98026e-05	9.35428e-06	0.0149964	1.70039e-06	0.0108266	0.129161					0.711953	0.000638677	897.077	2063.54	56				0.711206	0.00109096
16	Ipira01-Seq3-13um				0.000484699	0.000125503	4.24852e-05	0.000107348	0.0031298	0.000994767	8.81167e-06	0.00012627	-9.64159e-05	0.000140562	0.016135	0.0154925	2.63773e-06	0.000106192	0.0111543	0.0111532	0.133175	0.13326		0.161268			4.06599e-05	2.92919e-05	0.000978203	2.4763e-05	-6.49988e-07	0.0154472	7.52324e-06	0.0111377	0.133085					0.710537	0.000670281	943.345	70.2652	54				0.709753	0.00113605
17	Ipira03-Seq3-13um				0.000479738	0.00013787	3.87352e-05	0.000116512	0.00312959	0.000991536	1.3757e-05	0.000102368	-9.79172e-05	0.000109239	0.0159792	0.0154382	1.98357e-06	0.000136296	0.0110409	0.0111315	0.131828	0.133046		0.159637			4.01747e-05	3.24643e-05	0.00097237	2.77966e-05	-8.36792e-06	0.0153059	-3.98274e-06	0.0110218	0.131739					0.710166	0.000659427	928.553	-451.89	56				0.710206	0.00139714
18	Ipira03-Seq3-13um				0.000480461	0.000152278	2.63208e-05	0.000124417	0.00309907	0.000978512	8.45938e-06	0.000123635	-9.36809e-05	0.000133711	0.0157928	0.0155549	2.61009e-06	0.000103132	0.0109047	0.0112178	0.130207	0.133851		0.157674			4.00302e-05	8.61216e-06	0.00094763	1.41907e-05	1.2706e-05	0.0151044	-2.71418e-06	0.0109031	0.130124					0.711652	0.000548109	770.192	1640.06	56				0.71175	0.00114671
19	Ipira01-Seq4-13um				0.000477702	0.000126416	3.10074e-05	0.000105854	0.0031039	0.000922507	3.56826e-05	0.000124718	-0.000101215	0.000152748	0.0158402	0.0142588	7.74596e-06	0.000119317	0.0109396	0.01027	0.130603	0.122828		0.158153			4.00709e-05	2.42315e-05	0.000951451	2.51763e-05	-5.49263e-06	0.0151568	2.83703e-06	0.0109329	0.130531					0.711222	0.000599729	843.238	1034.1	57				0.710975	0.00145284
20	Ipira02-Seq4-13um				0.000476034	0.000116435	2.89291e-05	0.000110484	0.00311926	0.000894975	6.67733e-05	0.000130608	-9.93669e-05	0.00013592	0.0160624	0.0141161	1.23316e-05	0.000105078	0.0111011	0.010165	0.132516	0.121296		0.160469			4.06276e-05	1.69814e-05	0.000974935	4.7085e-05	1.46025e-05	0.0153812	6.77434e-06	0.0110951	0.132443					0.711139	0.000663159	932.531	917.708	58				0.709615	0.00125631
21	Ipira03-Seq4-13um				0.000473217	0.000110293	3.06903e-05	0.000122973	0.00308038	0.00097215	3.84495e-05	0.000122049	-9.27436e-05	0.000119411	0.0154951	0.0152904	6.20402e-06	0.00010382	0.0106842	0.0110305	0.127569	0.131527		0.154479			3.2032e-05	2.37616e-05	0.000931578	2.12257e-05	9.37136e-06	0.0148153	1.04432e-06	0.010682	0.127499					0.710853	0.000665752	936.553	515.719	54				0.711038	0.00139822
22	Ipira01-Seq5-13um				0.000477631	0.000138187	2.90465e-05	0.000137311	0.00308252	0.000949977	2.66473e-05	9.75542e-05	-0.000108117	0.000125853	0.0154662	0.0151143	9.70065e-07	0.00014039	0.010663	0.0108999	0.127341	0.130077		0.154203			3.98554e-05	2.12804e-05	0.000934443	3.44191e-06	-6.47948e-06	0.0147903	-6.40943e-06	0.0106581	0.12727					0.710599	0.000762305	1072.77	157.041	56				0.711009	0.00157033
23	Ipira02-Seq5-13um				0.000478882	0.000123687	2.69403e-05	0.000129555	0.00307418	0.000951953	2.52058e-05	0.000134739	-9.0828e-05	0.000123095	0.015373	0.0149907	8.6193e-06	0.000114707	0.0105879	0.0107925	0.126567	0.129089		0.153266			4.27335e-05	1.56637e-05	0.000928942	7.0724e-06	1.12228e-05	0.0146942	-1.8719e-06	0.0105888	0.126501					0.710618	0.000601259	846.108	183.813	55				0.711141	0.00128811
24	Ipira03-Seq5-13um				0.00048197	0.00011787	3.00933e-05	0.000121015	0.00308829	0.000986936	2.431e-05	0.000112413	-9.39734e-05	0.000154858	0.0155431	0.0157743	9.745e-06	0.0001097	0.0107173	0.0113775	0.128009	0.135708		0.155012			4.4164e-05	2.89601e-05	0.000945179	8.35162e-06	9.84912e-06	0.0148642	4.77185e-06	0.0107171	0.127938					0.710896	0.000688959	969.141	576.128	58				0.710043	0.00118571
																																						Average	0.710958							Average	0.710359
																																						2 s.d.	0.000948589							2 s.d.	0.00178618
																																						2 s.d. ppm	1334.24							2 s.d. ppm	2514.47
01	Ipira01-Seq6-10um				0.000466488	0.000145902	1.77939e-05	0.000119477	0.00263685	0.000679578	2.22166e-05	0.000150852	-9.85337e-05	0.000123888	0.00840643	0.0105762	-1.08869e-06	0.000105592	0.00556664	0.00762839	0.0665961	0.0910723		0.0806443			2.60299e-05	8.8936e-06	0.00049118	8.64349e-06	6.40905e-06	0.00773128	-2.08832e-06	0.00556148	0.0665286					0.708881	0.001555	2193.6	-2260.98	57				0.70792	0.00259381
02	Ipira02-Seq6-10um				0.000464682	0.000122067	1.66912e-05	0.000114011	0.002629	0.000647467	2.05743e-05	9.90575e-05	-0.00010773	0.000115537	0.00828055	0.0101002	1.08474e-05	0.00013212	0.00547834	0.00727624	0.0654532	0.087107		0.0792604			2.22735e-05	8.17957e-06	0.000486692	7.04501e-06	-4.51355e-06	0.00760175	3.6929e-06	0.00547947	0.0653946					0.711133	0.00138092	1941.86	908.808	57				0.710441	0.00378425
03	Ipira03-Seq6-10um				0.000468105	0.000117139	1.81193e-05	0.000128222	0.00263168	0.000673103	2.88002e-05	0.000114097	-0.000100969	0.00011097	0.00845672	0.010499	1.21227e-06	0.000120175	0.00560104	0.00756178	0.0670205	0.0902974		0.0811583			2.66439e-05	5.29044e-06	0.00048405	1.09041e-05	3.32059e-06	0.00777821	-3.47403e-06	0.00560489	0.0669585					0.710337	0.00158259	2227.94	-210.748	57				0.710138	0.0034413
04	Ipira01-Seq3-10um				0.000431534	0.000118495	2.24884e-05	0.000121243	0.00250329	0.000699058	1.94771e-05	0.00011113	-9.20618e-05	0.00013764	0.00895454	0.0108784	2.20471e-05	0.000136843	0.00600728	0.00782917	0.0717281	0.0934367		0.0868589			2.09698e-05	1.48995e-05	0.000514692	3.80667e-06	1.64765e-06	0.0083287	1.82315e-05	0.00599498	0.0716573					0.710051	0.00144302	2032.28	-613.606	57				0.703577	0.00353336
05	Ipira02-Seq3-10um				0.000427619	0.000136459	1.60573e-05	0.000129779	0.00255021	0.000762282	1.51962e-05	0.000114734	-9.54625e-05	0.000129323	0.00957471	0.0118938	6.03409e-06	0.000120781	0.00646564	0.00857504	0.0771808	0.10237		0.0934619			2.02971e-05	8.23241e-06	0.000568621	4.85625e-06	4.8733e-06	0.00895206	4.7015e-06	0.00646005	0.077109					0.710973	0.00115132	1619.35	684.52	57				0.709852	0.00225782
06	Ipira03-Seq3-10um				0.000424001	0.000129096	1.78873e-05	0.000101522	0.00249267	0.000692544	1.38489e-05	0.000104462	-0.000100658	0.000119021	0.008717	0.010678	1.9333e-06	0.000118185	0.00583768	0.0077064	0.0697186	0.0920051		0.0844255			1.95362e-05	1.28839e-05	0.00051686	-4.23851e-07	4.19091e-06	0.00809252	-3.19663e-06	0.00582704	0.069659					0.710585	0.00149854	2108.88	138.202	57				0.710996	0.00276859
07	Ipira01-Seq4-10um				0.000430744	0.000131018	1.90662e-05	0.000119796	0.0025264	0.000693196	1.7783e-05	0.000132524	-9.43078e-05	0.00014675	0.00921902	0.0109358	8.38524e-06	0.000113157	0.00621738	0.00788897	0.0740416	0.0942078		0.0896604			1.94097e-05	1.24381e-05	0.000543538	8.94004e-06	7.06789e-06	0.00858798	2.65727e-06	0.00620772	0.0739143					0.713584	0.00119885	1680.04	4359.45	57				0.711229	0.00240137
08	Ipira02-Seq4-10um				0.00042831	0.000151935	1.60877e-05	0.000132125	0.00252063	0.000719017	1.85344e-05	0.000117307	-9.69818e-05	0.000135713	0.009118	0.0113832	5.45772e-06	0.000128017	0.00613379	0.00822618	0.0732141	0.0978928		0.0886583			2.14694e-05	1.09444e-05	0.00054323	1.06341e-05	7.45875e-06	0.0084944	3.62401e-06	0.00611912	0.0731009					0.711021	0.00144586	2033.5	751.021	56				0.710594	0.00261938
09	Ipira03-Seq4-10um				0.00043058	0.000130828	2.20868e-05	0.000145837	0.00252273	0.00070885	1.9908e-05	9.95394e-05	-8.37097e-05	0.000109692	0.00922557	0.0110308	9.69292e-08	0.000110132	0.00621722	0.0079814	0.0740671	0.0949979		0.0896914			1.84627e-05	1.36461e-05	0.000542754	6.22235e-06	8.18937e-06	0.00859567	-1.20476e-06	0.00620341	0.0739572					0.712188	0.00141755	1990.41	2394.33	58				0.711715	0.00211197
10	Ipira01-Seq1-10um				0.000472257	0.000124779	2.16e-05	0.000137854	0.00265341	0.000654112	6.01212e-06	0.000106251	-7.99795e-05	0.000146072	0.00776359	0.00981766	7.0033e-06	0.000102315	0.00509091	0.00708193	0.0608662	0.0843631		0.0737057			1.61186e-05	1.07491e-05	0.00045021	-2.91618e-06	9.77474e-06	0.00706409	6.10207e-07	0.00507601	0.0608065					0.707513	0.00159197	2250.09	-4185.18	55				0.706481	0.00252442
11	Ipira02-Seq1-10um				0.000471333	0.00012625	2.01939e-05	0.000139483	0.00260366	0.000679762	1.77246e-05	0.000124738	-0.00010241	0.000132736	0.00770757	0.0100379	8.1079e-07	0.000115805	0.00507164	0.00723211	0.0605913	0.0862502		0.0733728			1.49136e-05	1.39899e-05	0.000412235	8.96715e-06	-9.24941e-06	0.00701258	-3.86137e-06	0.00505949	0.0605377					0.710801	0.00221424	3115.14	441.978	55				0.710472	0.00277699
12	Ipira03-Seq1-10um				0.000442069	0.000133403	2.83266e-05	0.000125328	0.00251657	0.000682394	1.80081e-05	0.000117555	-9.13985e-05	0.000111114	0.00806695	0.0103238	3.42504e-06	0.00011291	0.00535193	0.00746185	0.0639313	0.0890062		0.0774174			1.18311e-05	1.52925e-05	0.000444883	9.89437e-06	7.08114e-06	0.00741608	-3.54983e-07	0.00533763	0.0638619					0.709725	0.00144212	2031.95	-1071.85	57				0.710043	0.002862
13	Ipira01-Seq2-10um				0.000444028	0.000116503	2.52784e-05	0.000115272	0.00248234	0.000659275	8.1296e-06	0.000111267	-9.846e-05	0.000137335	0.00766379	0.0100792	4.31812e-06	0.000109713	0.00507706	0.00724122	0.060518	0.0865122		0.0732841			1.90462e-05	1.76144e-05	0.000446993	4.88375e-06	-1.3845e-06	0.00701639	6.41598e-06	0.00506752	0.0604549					0.711875	0.00129631	1820.98	1953.78	55				0.708003	0.00259021
14	Ipira02-Seq2-10um				0.000440879	0.000109274	1.98565e-05	0.000116384	0.00247393	0.000637937	1.29398e-05	0.00012116	-0.000101148	9.98806e-05	0.00773359	0.0099701	5.07528e-06	0.000116281	0.00511508	0.00718704	0.0610723	0.0859526		0.0739553			1.31885e-05	6.88095e-06	0.000436565	1.08869e-05	5.54251e-06	0.00708474	-2.01659e-06	0.00510256	0.0610096					0.710685	0.00203001	2856.41	278.278	57				0.711648	0.00344908
15	Ipira03-Seq2-10um				0.000439997	0.000121363	2.24703e-05	0.000119246	0.00248584	0.000641063	1.19477e-05	0.0001038	-0.000102151	0.000120828	0.00780201	0.00993571	6.34105e-06	0.000118535	0.0051783	0.00719339	0.0617102	0.0856764		0.0747278			1.97269e-05	9.82504e-06	0.000453697	7.36947e-06	3.96085e-06	0.00716161	1.23358e-06	0.00517094	0.06165					0.712076	0.00176062	2472.51	2237.08	56				0.710699	0.00335554
16	Ipira01-Seq3-10um				0.00043861	0.000123703	9.46282e-06	0.000107454	0.00248154	0.000660958	1.76247e-05	0.000112218	-0.0001	0.000127953	0.00779384	0.0103781	7.94531e-08	0.000124087	0.00516489	0.00747701	0.0616887	0.0892993		0.0747018			1.99958e-05	3.16116e-06	0.000449524	1.2343e-05	5.78868e-06	0.00715158	5.01012e-06	0.00515507	0.0616246					0.710247	0.00176126	2479.78	-338.431	57				0.708463	0.00364434
17	Ipira02-Seq3-10um				0.000448324	0.00013596	2.02116e-05	0.000122804	0.00248285	0.000645124	2.00342e-05	0.00010834	-9.07743e-05	0.000123761	0.00775571	0.0101202	7.35458e-06	0.000129268	0.00513676	0.00728411	0.0613281	0.0870537		0.0742651			2.87824e-05	1.20726e-05	0.000449372	1.31224e-05	3.77357e-06	0.00711126	3.02023e-06	0.00512322	0.0612626					0.709895	0.00146861	2068.78	-833.377	57				0.707855	0.00377886
18	Ipira03-Seq3-10um				0.000445748	0.000135003	1.57298e-05	0.000130094	0.00246006	0.000603142	2.05786e-05	0.000129422	-9.50181e-05	0.000124943	0.00751136	0.00936758	1.05777e-05	9.66166e-05	0.00496039	0.00675917	0.0591727	0.0807085		0.0716549			2.69219e-05	5.02265e-06	0.000427253	9.97395e-06	1.09634e-06	0.0068637	9.03139e-06	0.00495409	0.059114					0.711725	0.00151761	2132.3	1742.65	57				0.707781	0.00264846
19	Ipira01-Seq4-10um				0.000449153	0.000127543	1.74688e-05	0.000115941	0.00249166	0.000653271	9.14622e-06	0.0001189	-9.35843e-05	0.000132141	0.00777301	0.00997273	1.2794e-05	0.000116799	0.00514465	0.0071979	0.0614576	0.0859751		0.0744219			2.98292e-05	6.93877e-06	0.000452019	8.92659e-06	1.15822e-05	0.00712532	8.45141e-06	0.00513446	0.061399					0.71029	0.00117444	1653.47	-277.647	55				0.70726	0.0026944
20	Ipira02-Seq4-10um				0.000437913	0.000122363	2.33887e-05	0.000134804	0.00251758	0.000706868	1.57309e-05	0.000119737	-9.73919e-05	0.000119118	0.00831887	0.0107988	8.5906e-06	0.000117734	0.00554102	0.0077917	0.066092	0.0929003		0.0800339			1.84014e-05	1.83167e-05	0.000481921	1.31418e-05	-1.24558e-06	0.00767393	6.41652e-06	0.00553355	0.0660253					0.710989	0.00172975	2432.89	706.423	57				0.708269	0.00327536
21	Ipira03-Seq4-10um				0.000451406	0.00012205	2.41223e-05	0.000119377	0.00246841	0.000621396	1.89224e-05	0.000115698	-9.13354e-05	9.88355e-05	0.00758033	0.00958793	5.37693e-06	0.000116136	0.00499927	0.00690203	0.0597737	0.0824214		0.0723828			2.80988e-05	1.59173e-05	0.000434195	1.23221e-05	8.08725e-06	0.00693479	1.98581e-06	0.00499449	0.0597084					0.710204	0.00151095	2127.49	-398.263	56				0.708648	0.00326282
																																						Average	0.710704							Average	0.709147
																																						2 s.d.	0.00251263							2 s.d.	0.00400872
																																						2 s.d. ppm	3535.41							2 s.d. ppm	5652.88
01	MAD01-Seq7-50um				0.000886578	0.000117089	0.00026845	0.00012962	0.0703116	0.0112989	0.000170678	0.000121295	-3.45176e-05	0.000132615	1.21104	0.200688	8.05705e-05	0.000124062	0.873317	0.14497	10.4095	1.72705		12.6053			0.000475344	0.000262128	0.0683243	0.000156263	6.99096e-05	1.21032	7.32993e-05	0.873236	10.4088					0.711903	8.39751e-05	117.959	144.994	58				0.711798	8.38797e-05
02	MAD02-Seq7-50um				0.000891619	0.000159361	0.000270663	0.00011711	0.068792	0.00964229	0.000227823	0.00117157	-4.24073e-05	0.000133091	1.18402	0.170399	7.48745e-05	0.000140773	0.853843	0.123269	10.1761	1.46616		12.3227			0.000493462	0.000259972	0.0667892	0.00021975	7.04351e-05	1.18329	7.29153e-05	0.853749	10.1752					0.711951	7.28236e-05	102.287	212.064	58				0.711842	7.07701e-05
03	MAD03-Seq7-50um				0.000900782	0.000194381	0.000277243	0.000136943	0.0692684	0.00751637	0.000178223	0.000110898	-3.1498e-05	0.000126717	1.19207	0.132536	7.40125e-05	0.000117787	0.859603	0.0960093	10.2451	1.14664		12.4063			0.000491011	0.000266243	0.0672708	0.000178202	7.04713e-05	1.19131	6.42614e-05	0.859508	10.2441					0.71193	5.99464e-05	84.2027	182.968	58				0.711833	6.25194e-05
04	MAD01-Seq8-50um				0.000933745	0.000194989	0.00029901	0.000143348	0.0732116	0.0083133	0.00020298	0.000121496	-3.4472e-05	0.000140785	1.26165	0.14752	7.56179e-05	0.000149061	0.909892	0.106527	10.845	1.27065		13.1328			0.000520293	0.00028871	0.0712164	0.00019686	8.22929e-05	1.2609	7.70457e-05	0.909804	10.8441					0.71194	7.38243e-05	103.695	196.082	58				0.711824	7.66439e-05
05	MAD02-Seq8-50um				0.000894428	0.000222619	0.00027554	0.000151327	0.0690999	0.0250844	0.000176405	0.000157599	-3.33367e-05	0.000126088	1.18931	0.445316	7.47188e-05	0.000144202	0.857573	0.321409	10.2199	3.83707		12.3757			0.000483857	0.000266876	0.0671023	0.000166984	7.7905e-05	1.18855	8.62832e-05	0.85746	10.2188					0.711942	6.78575e-05	95.3132	199.492	57				0.711842	7.68427e-05
06	MAD03-Seq8-50um				0.000967042	0.000189308	0.000310222	0.000130888	0.0735588	0.0184336	0.000200402	0.000120093	-9.53674e-06	0.000122315	1.26742	0.32762	8.43779e-05	0.000120375	0.914006	0.236683	10.8931	2.82781		13.191			0.000549857	0.000300821	0.0715489	0.000209075	8.4393e-05	1.26666	7.279e-05	0.913888	10.8919					0.711982	6.26293e-05	87.9648	255.069	58				0.711867	6.06628e-05
07	MAD01-Seq9-50um				0.000922998	0.000262265	0.000296135	0.000180937	0.070997	0.0105442	0.000191358	0.00015094	-1.6297e-05	0.000121235	1.22264	0.184898	8.44606e-05	0.000118175	0.881741	0.133725	10.5085	1.59376		12.7253			0.00052124	0.000290592	0.0690044	0.000190042	9.17923e-05	1.22189	7.74441e-05	0.881652	10.5076					0.711948	6.95373e-05	97.6719	207.527	57				0.711817	6.38415e-05
08	MAD02-Seq9-50um				0.000913301	0.000166687	0.000290943	0.000158161	0.0714337	0.0162571	0.000183834	0.000145278	-2.50282e-05	0.000123052	1.23021	0.289488	8.90174e-05	0.000122189	0.887087	0.209069	10.5721	2.49629		12.8022			0.000502896	0.000296491	0.0694507	0.000188863	7.18633e-05	1.22944	8.83341e-05	0.886974	10.571					0.711922	7.64205e-05	107.344	171.177	57				0.711803	7.52445e-05
09	MAD03-Seq9-50um				0.000843116	0.000170453	0.000250003	0.000151129	0.0662227	0.0205124	0.000157556	0.000133057	-3.24556e-05	0.000143153	1.13796	0.364526	6.60232e-05	0.000120316	0.820428	0.26326	9.77464	3.1422		11.8366			0.000442046	0.00023728	0.0642338	0.000164344	7.91809e-05	1.13719	6.26454e-05	0.820304	9.7734					0.712008	8.51036e-05	119.526	292.651	57				0.71188	8.08761e-05
10	MAD01-Seq1-50um				0.00102386	0.000189474	0.000348585	0.000140409	0.0691179	0.0166605	0.000225895	0.000134805	-9.27106e-06	0.000147122	1.18712	0.295008	9.03168e-05	0.000114913	0.856061	0.212916	10.2042	2.53575		12.3567			0.000585783	0.000333453	0.0670362	0.000228101	8.88054e-05	1.18642	9.1373e-05	0.856025	10.2038					0.711945	5.28054e-05	74.1706	203.343	57				0.711797	5.58173e-05
11	MAD02-Seq1-50um				0.00100293	0.000157862	0.000322898	0.000148044	0.0669463	0.00723823	0.000214725	0.000119221	-6.47486e-06	0.000123558	1.1489	0.128442	9.12555e-05	0.000126931	0.828477	0.092762	9.87495	1.10183		11.958			0.000571927	0.000320115	0.064851	0.000225585	9.83012e-05	1.14816	9.11271e-05	0.828413	9.8743					0.711928	5.89641e-05	82.8232	179.627	58				0.711791	6.13288e-05
12	MAD03-Seq1-50um				0.0010245	0.00016302	0.000345865	0.000119139	0.0669571	0.0110792	0.000219551	0.000129791	-1.56369e-05	0.000108936	1.14856	0.19599	0.000101057	0.000108709	0.82829	0.141602	9.87223	1.68535		11.9547			0.000590872	0.000340514	0.0648746	0.000219472	9.08226e-05	1.14781	9.62489e-05	0.828218	9.87142					0.711993	5.58029e-05	78.3757	270.581	56				0.711853	5.74516e-05
13	MAD01-Seq2-50um				0.00105416	0.000164455	0.000364225	0.000130557	0.0695482	0.0140454	0.000229667	0.00011589	-2.25852e-07	0.00013678	1.19438	0.248389	0.000100572	0.000109392	0.861371	0.179355	10.2675	2.13449		12.4334			0.00063187	0.000360812	0.0674602	0.000232944	0.000100239	1.19362	9.65709e-05	0.861284	10.2667					0.711963	5.78741e-05	81.288	229.321	59				0.711827	5.88442e-05
14	MAD02-Seq2-50um				0.00106989	0.000178038	0.000378126	0.0001402	0.070473	0.0159103	0.000241748	0.00013645	-2.63711e-06	0.000148996	1.2111	0.281595	0.000101325	0.000106579	0.873495	0.20334	10.4121	2.42058		12.6085			0.000638054	0.000373077	0.0683785	0.000247932	0.000102061	1.21033	0.000102892	0.873394	10.4111					0.711989	4.86538e-05	68.335	265.081	58				0.711837	4.8002e-05
15	MAD03-Seq2-50um				0.00105759	0.000150509	0.000360889	0.000129599	0.0706841	0.014951	0.000224548	0.000170649	-5.60362e-06	0.000142415	1.21498	0.265178	9.55498e-05	0.000117128	0.876219	0.191207	10.4444	2.27647		12.6476			0.000621263	0.00034533	0.0685894	0.000240829	9.28112e-05	1.21419	9.9278e-05	0.876109	10.4433					0.711962	4.92309e-05	69.1482	227.639	59				0.711798	5.2626e-05
16	MAD01-Seq5-50um				0.00107915	0.00017206	0.000400134	0.000129857	0.0709717	0.0181288	0.000269509	0.000146033	6.75498e-06	0.00012379	1.22158	0.3221	0.000107841	0.000130919	0.881282	0.232443	10.5073	2.77071		12.7238			0.00067815	0.000384966	0.0690241	0.000266042	0.000102913	1.22094	0.000111402	0.88124	10.507					0.711945	4.79057e-05	67.2884	204.323	57				0.711778	4.95631e-05
17	MAD02-Seq5-50um				0.00108932	0.000203116	0.000408119	0.000131893	0.0693053	0.0185907	0.000264153	0.000145652	8.31321e-06	0.000121581	1.19163	0.329733	0.000102235	0.000123795	0.859635	0.238184	10.2487	2.83806		12.4106			0.000697549	0.000401283	0.0673514	0.000260892	0.000112664	1.19096	0.000104655	0.859576	10.2482					0.711974	5.51091e-05	77.4032	245.139	58				0.711818	5.82346e-05
18	MAD03-Seq5-50um				0.00108761	0.000207575	0.000399802	0.000161811	0.070974	0.0146443	0.000280162	0.00024757	1.21585e-05	0.000118487	1.22185	0.257939	9.86426e-05	0.000124243	0.88143	0.186434	10.5092	2.21902		12.726			0.000688112	0.000392027	0.069022	0.000271694	0.000113839	1.22117	9.9023e-05	0.881359	10.5085					0.711905	7.14372e-05	100.347	147.091	57				0.711742	6.6392e-05
19	MAD01-Seq6-50um				0.00103618	0.00027639	0.00037554	0.00021565	0.0686626	0.0210208	0.00025227	0.000163956	8.87507e-07	0.000134756	1.18097	0.371598	9.80887e-05	0.000132739	0.851879	0.268423	10.1551	3.20287		12.2973			0.000637825	0.000373394	0.0667157	0.000249554	0.000104476	1.18031	0.000103275	0.851826	10.1546					0.711987	6.12243e-05	85.9908	262.122	57				0.711819	5.52016e-05
20	MAD02-Seq6-50um				0.00108311	0.000236184	0.000411836	0.00018407	0.0705192	0.0178009	0.000262906	0.000147656	1.34308e-05	0.000146124	1.21303	0.315416	0.000108024	0.000120025	0.875039	0.227936	10.4315	2.72162		12.632			0.000685144	0.000405173	0.0685658	0.000257422	0.000111023	1.21234	0.000113172	0.874969	10.4308					0.711978	4.65696e-05	65.4087	250.625	58				0.711819	4.63136e-05
21	MAD03-Seq6-50um				0.00102508	0.000232011	0.000365218	0.000165515	0.0671872	0.0244695	0.000239022	0.00012584	1.29213e-06	0.000117423	1.15502	0.433438	9.01777e-05	0.000100038	0.833242	0.312862	9.9333	3.73437		12.0287			0.000629296	0.000360462	0.0652377	0.000239647	9.18502e-05	1.15433	8.91133e-05	0.833167	9.93256					0.711996	6.39428e-05	89.8079	274.923	56				0.711854	6.65021e-05
																																						Average	0.711957							Average	0.711821
																																						2 s.d.	6.01169e-05							2 s.d.	6.30563e-05
																																						2 s.d. ppm	84.4389							2 s.d. ppm	88.5845
01	MAD01-Seq4-25um				0.000589428	0.000126753	9.91274e-05	0.000129824	0.0209979	0.00790804	7.70757e-05	0.000102973	-8.48549e-05	0.000133005	0.335119	0.140038	2.73366e-05	0.000110705	0.241352	0.101042	2.87684	1.20414		3.48371			0.000153741	8.46652e-05	0.0189082	6.61046e-05	8.55731e-06	0.33443	2.3228e-05	0.241316	2.87657					0.711955	7.38403e-05	103.715	217.687	58				0.711825	8.74499e-05
02	MAD02-Seq4-25um				0.000587307	0.000116599	9.90641e-05	0.000144555	0.021012	0.00760784	6.05599e-05	9.75893e-05	-7.53281e-05	0.000151516	0.335572	0.134651	2.30524e-05	0.000121142	0.241667	0.0971139	2.88078	1.1575		3.48847			0.000154921	9.53599e-05	0.0189415	5.48761e-05	4.06958e-05	0.33489	2.38417e-05	0.241635	2.88046					0.711923	7.57418e-05	106.391	172.35	56				0.711788	0.000100841
03	MAD03-Seq4-25um				0.00057919	0.000122718	9.87504e-05	0.000121225	0.021061	0.00765254	7.48202e-05	0.000101291	-9.33311e-05	0.000117073	0.336651	0.135554	2.12091e-05	0.000126353	0.242484	0.0978335	2.89035	1.16586		3.50006			0.000162465	9.25461e-05	0.0189806	5.80906e-05	1.67062e-05	0.335948	3.85377e-06	0.242454	2.89					0.712033	8.91583e-05	125.217	327.363	58				0.711999	9.54088e-05
04	MAD01-Seq5-25um				0.00058437	0.000137369	9.88456e-05	0.000116981	0.0211643	0.00769473	6.79577e-05	0.000118928	-8.27578e-05	0.000122832	0.338509	0.136067	3.23763e-05	0.000132171	0.2438	0.0982205	2.90616	1.17064		3.51921			0.000157088	9.55594e-05	0.0190996	6.12405e-05	1.82123e-05	0.337817	2.54991e-05	0.243757	2.90577					0.711938	8.77825e-05	123.301	193.243	58				0.711768	0.000105106
05	MAD02-Seq5-25um				0.00057292	0.000129069	9.55952e-05	0.000133134	0.0211825	0.00826812	6.50211e-05	9.14347e-05	-8.05439e-05	0.000135055	0.338894	0.146602	2.8417e-05	0.00010772	0.244092	0.10575	2.90965	1.26051		3.52343			0.000156792	8.59869e-05	0.0191256	5.73879e-05	2.41866e-05	0.338193	1.96983e-05	0.244051	2.90924					0.711979	8.2772e-05	116.256	251.93	58				0.711833	9.26391e-05
06	MAD03-Seq5-25um				0.000584718	0.000100763	0.000103117	0.00010001	0.0210817	0.00790069	6.85196e-05	0.000101764	-6.99963e-05	0.000132814	0.337134	0.139804	2.6055e-05	0.000105213	0.242806	0.100928	2.89418	1.20248		3.5047			0.0001571	9.21532e-05	0.0190061	5.96259e-05	3.19248e-05	0.336424	2.38308e-05	0.242769	2.89377					0.711999	9.7181e-05	136.49	278.998	59				0.71186	9.63731e-05
07	MAD01-Seq6-25um				0.000580096	0.000127827	9.11088e-05	0.000120891	0.0212118	0.00863238	7.14156e-05	0.000124057	-7.72102e-05	0.000147388	0.339474	0.15268	2.93991e-05	0.000126533	0.24449	0.110222	2.91454	1.31328		3.52935			0.000161506	6.48802e-05	0.0191437	5.48112e-05	1.49552e-05	0.338776	2.08824e-05	0.24445	2.9141					0.711886	7.91957e-05	111.248	120.186	57				0.711764	8.75022e-05
08	MAD02-Seq6-25um				0.000592611	0.000120687	0.000101339	0.000121403	0.0213247	0.00833988	7.66539e-05	0.000115728	-7.42341e-05	0.000148903	0.341312	0.147765	3.03198e-05	0.000118642	0.24582	0.106632	2.93041	1.2704		3.54857			0.00017239	9.76189e-05	0.0192649	6.7235e-05	3.42947e-05	0.340599	2.28968e-05	0.245774	2.92995					0.711926	8.30185e-05	116.611	177.473	58				0.711797	9.13594e-05
09	MAD03-Seq6-25um				0.000586836	0.00013591	9.80642e-05	0.000118127	0.0212763	0.0078954	6.787e-05	0.000118225	-7.71829e-05	0.000118687	0.340432	0.139476	3.20943e-05	0.000122948	0.245192	0.100703	2.92285	1.19956		3.53942			0.000160617	9.26072e-05	0.0192291	6.22234e-05	3.35779e-05	0.339733	1.96891e-05	0.245146	2.92239					0.71191	8.33088e-05	117.022	154.244	59				0.711789	0.000105478
10	MAD01-Seq1-25um				0.00063773	0.000132074	0.00013159	0.000142783	0.0213089	0.00899478	7.54787e-05	0.000120045	-6.46914e-05	0.000143633	0.340763	0.159607	4.22013e-05	0.000113357	0.245546	0.115161	2.92847	1.37389		3.54622			0.000214604	0.000130024	0.0192548	8.20943e-05	1.76126e-05	0.3401	2.78696e-05	0.245526	2.92828					0.711935	7.98138e-05	112.108	190.341	59				0.711801	9.69539e-05
11	MAD02-Seq1-25um				0.000642302	0.000151268	0.000124234	0.000130662	0.0215299	0.00942756	7.32221e-05	0.000164508	-6.25471e-05	0.000118304	0.344579	0.166978	4.32482e-05	0.000111097	0.248298	0.120636	2.96114	1.43768		3.58579			0.000214964	0.000114087	0.0194735	7.79657e-05	2.80684e-05	0.34391	3.83365e-05	0.248277	2.96092					0.711969	7.65142e-05	107.468	237.768	58				0.711746	9.42363e-05
12	MAD03-Seq1-25um				0.000635441	0.00013078	0.000131443	0.000136371	0.0212924	0.00918233	7.96028e-05	0.000104054	-6.52666e-05	0.000104918	0.340425	0.162773	3.4605e-05	0.000127788	0.245282	0.117445	2.92542	1.40069		3.54253			0.000210096	0.000124882	0.0192328	7.78715e-05	2.9495e-05	0.339757	2.54215e-05	0.245263	2.92519					0.711931	7.1421e-05	100.32	184.674	57				0.711734	0.000103415
13	MAD01-Seq2-25um				0.000662343	0.000164716	0.000150076	0.000117851	0.0207431	0.00871899	9.47709e-05	0.000144976	-4.39184e-05	0.000123371	0.330256	0.1541	3.59951e-05	0.000139648	0.237948	0.11125	2.83722	1.32593		3.43572			0.000238152	0.000143859	0.0186894	9.76844e-05	4.95144e-05	0.329592	3.26244e-05	0.237928	2.83697					0.712006	7.42208e-05	104.242	289.043	60				0.711854	7.50397e-05
14	MAD02-Seq2-25um				0.00065522	0.000136803	0.000142552	0.000135744	0.0203101	0.00841691	8.87609e-05	0.000116354	-5.76003e-05	0.000109524	0.322492	0.148791	4.22171e-05	0.000116903	0.232336	0.10741	2.77008	1.28063		3.35442			0.000232734	0.000134333	0.0182585	8.99291e-05	3.01156e-05	0.321827	3.31765e-05	0.232313	2.76982					0.712019	7.91136e-05	111.112	307.966	58				0.711858	7.43689e-05
15	MAD03-Seq2-25um				0.000651146	0.000140019	0.000140039	0.000127539	0.0204062	0.00822217	9.03722e-05	9.14413e-05	-6.35321e-05	0.000152013	0.324459	0.14542	3.92892e-05	0.000111149	0.233732	0.104972	2.78667	1.25037		3.37451			0.000230515	0.000130739	0.0183536	8.88776e-05	3.03029e-05	0.323786	3.11551e-05	0.233711	2.7864					0.711981	7.03864e-05	98.8599	254.305	57				0.711801	9.78087e-05
16	MAD01-Seq3-25um				0.000664059	0.000143464	0.000150106	0.000122277	0.020581	0.00861572	8.81843e-05	0.000114646	-5.80127e-05	0.000132129	0.327573	0.152085	4.03974e-05	0.000120434	0.23599	0.109704	2.81416	1.30863		3.40779			0.000244823	0.000137673	0.0185347	8.40463e-05	3.9633e-05	0.3269	2.50843e-05	0.235963	2.81388					0.71195	6.8365e-05	96.0251	210.311	59				0.711784	8.12426e-05
17	MAD02-Seq3-25um				0.000656434	0.000144376	0.000146491	0.000122151	0.0204963	0.00798171	8.98143e-05	0.000127049	-5.68913e-05	0.000111485	0.325977	0.140974	4.14109e-05	0.000127895	0.23485	0.101712	2.79995	1.21256		3.39059			0.000234937	0.000141429	0.018446	9.38367e-05	3.84432e-05	0.325308	2.77219e-05	0.23483	2.79966					0.712022	7.06654e-05	99.2461	311.222	56				0.711869	8.82239e-05
18	MAD03-Seq3-25um				0.000641668	0.00015092	0.000134636	0.000131302	0.0202935	0.0070488	8.30044e-05	0.0001288	-7.04917e-05	0.000126597	0.322687	0.124087	3.65941e-05	0.00011524	0.232461	0.0894965	2.77138	1.06749		3.35599			0.000218757	0.000126038	0.0182497	8.31643e-05	2.87375e-05	0.322016	2.93998e-05	0.232445	2.7711					0.712043	9.38874e-05	131.856	341.032	59				0.711848	0.000107625
19	MAD01-Seq5-25um				0.000621568	0.000161176	0.000128768	0.000120476	0.0209209	0.00939193	8.26867e-05	0.000116018	-6.86158e-05	0.000119052	0.335338	0.166314	1.594e-05	0.000101156	0.241582	0.119994	2.88043	1.43146		3.48805			0.000205498	0.000125703	0.0189289	7.66458e-05	1.95308e-05	0.334701	1.91671e-05	0.241569	2.88032					0.711968	7.13028e-05	100.149	235.993	57				0.711835	8.43516e-05
20	MAD02-Seq5-25um				0.000613632	0.000140324	0.000121667	0.000124362	0.0209448	0.00921306	7.47574e-05	9.90567e-05	-5.93677e-05	0.000121873	0.336096	0.163036	2.83591e-05	0.000120964	0.242145	0.117717	2.88701	1.40299		3.49602			0.000203012	0.000112816	0.0189664	6.65388e-05	3.80111e-05	0.335451	3.13477e-05	0.242133	2.88686					0.711971	7.50813e-05	105.456	239.719	58				0.711823	9.76136e-05
21	MAD03-Seq5-25um				0.000603633	0.000134258	0.000117156	0.000141221	0.0207558	0.00889979	8.07676e-05	0.000119034	-6.65006e-05	0.000131098	0.332778	0.157535	2.13658e-05	0.000115248	0.239737	0.1137	2.85845	1.3556		3.46143			0.000194631	0.000112061	0.0187764	7.53598e-05	2.47128e-05	0.332134	2.68125e-05	0.239714	2.85826					0.711886	8.13878e-05	114.327	120.124	55				0.71176	0.00010505
																																						Average	0.711963							Average	0.711816
																																						2 s.d.	9.17612e-05							2 s.d.	0.000115082
																																						2 s.d. ppm	128.885							2 s.d. ppm	161.674
01	MAD01-Seq1-13um				0.000478325	0.000116927	3.19209e-05	0.000134895	0.00660525	0.0042593	1.77574e-05	0.000109865	-9.7289e-05	0.000127785	0.0797552	0.0748639	-5.73438e-06	0.000124769	0.0570659	0.054025	0.680278	0.643859		0.823781			4.74933e-05	2.06129e-05	0.00446746	1.73459e-05	6.41505e-06	0.0790902	-1.88863e-05	0.0570548	0.680168					0.71185	0.000159811	224.501	70.0045	57				0.712248	0.000280299
02	MAD02-Seq1-13um				0.000483509	0.000109314	3.71559e-05	9.10083e-05	0.00669495	0.00401366	2.14797e-05	0.000113397	-9.64754e-05	0.00012957	0.0814065	0.0709072	4.29893e-06	0.0001341	0.0582638	0.051198	0.69443	0.609972		0.840918			4.53529e-05	1.22401e-05	0.00457098	1.20104e-05	9.0538e-07	0.0807152	4.27095e-06	0.0582608	0.694324					0.712114	0.000158986	223.26	440.477	57				0.711916	0.000268266
03	MAD03-Seq1-13um				0.000472084	0.000104068	3.31801e-05	0.0001289	0.0066458	0.00413608	1.98645e-05	0.000105684	-9.77947e-05	0.00012008	0.0805559	0.0733529	1.05428e-05	0.000130464	0.057627	0.0529234	0.687015	0.630563		0.831938			3.48731e-05	1.86004e-05	0.00452142	1.68898e-05	5.56979e-06	0.079877	1.40757e-05	0.0576082	0.686893					0.711696	0.000164895	231.692	-146.107	57				0.711424	0.000285932
04	MAD01-Seq2-13um				0.000480811	0.000145662	3.8846e-05	0.000124359	0.00662938	0.00417873	7.28958e-06	0.000104404	-0.000103265	0.000101063	0.0803676	0.0741071	4.66012e-07	0.000117429	0.0575181	0.053464	0.685564	0.63735		0.830181			4.77374e-05	1.99583e-05	0.00450261	1.26634e-05	4.66231e-06	0.0796892	9.1101e-07	0.0575088	0.685431					0.712034	0.000154362	216.79	328.659	57				0.711976	0.000260056
05	MAD02-Seq2-13um				0.000468694	0.000117646	3.68329e-05	0.000115522	0.00657218	0.0039144	2.92591e-06	0.000128836	-0.000102414	0.000119742	0.0794692	0.0690217	1.34522e-06	0.000109523	0.0568712	0.0498096	0.677698	0.593256		0.820657			4.26515e-05	3.29139e-05	0.00444738	3.89036e-06	-5.53458e-08	0.0787982	1.8005e-06	0.0568501	0.67756					0.711946	0.000155453	218.349	205.707	58				0.711991	0.000247121
06	MAD03-Seq2-13um				0.000474392	0.000145742	2.6727e-05	0.000126936	0.00677205	0.00422969	-3.58392e-07	0.000123076	-0.000102303	0.000124289	0.0828618	0.0748344	4.08393e-06	0.000126951	0.0593063	0.0539877	0.707026	0.643464		0.856171			4.45377e-05	2.08516e-05	0.00464674	7.76694e-06	2.97245e-06	0.0821778	-5.99327e-06	0.0592881	0.706882					0.711879	0.000175823	246.985	110.447	58				0.711852	0.000289117
07	MAD01-Seq3-13um				0.000472387	0.000135507	3.39554e-05	0.00012099	0.00662731	0.0042816	2.55891e-05	0.000126746	-0.000108587	0.000119143	0.0802563	0.0755793	1.16506e-05	0.000114837	0.0574352	0.054542	0.68456	0.650066		0.828966			3.3876e-05	2.56165e-05	0.0045094	3.50738e-05	-1.86221e-06	0.0795785	7.62256e-06	0.0574136	0.684406					0.711832	0.000146719	206.114	44.2566	57				0.711462	0.000290444
08	MAD02-Seq3-13um				0.00047232	0.000134282	3.25377e-05	0.000133231	0.00656578	0.00428288	1.49836e-05	0.000130672	-9.75676e-05	0.000116691	0.0793314	0.0754954	1.4813e-05	0.000116846	0.0567766	0.0544954	0.6767	0.649351		0.819448			3.37678e-05	1.94111e-05	0.00443043	1.68293e-05	1.50023e-05	0.078646	6.3769e-06	0.0567587	0.676551					0.712045	0.000187307	263.056	344.217	59				0.71186	0.000307705
09	MAD03-Seq3-13um				0.000473659	0.000109065	3.28925e-05	0.000119994	0.00658131	0.00389135	1.35414e-05	0.000128792	-0.000106067	0.000116552	0.0795435	0.068946	4.35776e-06	0.000109931	0.0569187	0.0497018	0.678441	0.592731		0.821556			3.94414e-05	2.62451e-05	0.00446638	1.30971e-05	1.08382e-05	0.0788663	-1.14592e-05	0.0569046	0.678295					0.711927	0.000197727	277.735	179.076	58				0.712086	0.000293243
10	MAD01-Seq1-13um				0.000486239	0.000144785	3.67759e-05	0.000143342	0.00659889	0.00438239	1.90448e-05	0.000135973	-9.24877e-05	9.37937e-05	0.0804394	0.0774474	1.14109e-05	0.000125062	0.0575865	0.0559197	0.686737	0.666912		0.831602			5.45246e-05	2.92332e-05	0.00450746	1.88719e-05	5.54822e-06	0.0797726	8.3725e-06	0.057573	0.686665					0.711839	0.000156644	220.055	54.9002	57				0.711519	0.000241135
11	MAD02-Seq1-13um				0.00047398	0.000112989	4.07381e-05	0.000129102	0.0066312	0.00432613	2.62473e-05	0.000145319	-9.72742e-05	0.000125858	0.0808918	0.0761439	5.79209e-06	0.000132311	0.057918	0.0549664	0.690602	0.655327		0.836282			4.25152e-05	2.89134e-05	0.00453681	3.40069e-05	5.17939e-06	0.080217	3.38928e-06	0.0579044	0.690528					0.711965	0.000192531	270.422	232.39	57				0.711699	0.000264413
12	MAD03-Seq1-13um				0.000474995	0.000141588	3.88639e-05	0.000122681	0.00657839	0.00386171	2.13252e-05	0.000113117	-8.74044e-05	0.000109268	0.0799098	0.0682518	1.00562e-05	0.000105808	0.0572008	0.0492508	0.682117	0.587357		0.826007			4.21189e-05	2.58706e-05	0.00448206	1.93313e-05	1.74183e-05	0.0792341	6.00692e-06	0.0571832	0.682041					0.711753	0.000153616	215.828	-66.0409	56				0.711621	0.000235613
13	MAD01-Seq2-13um				0.000486725	0.000142755	3.57939e-05	0.00011525	0.00673371	0.00423014	2.11604e-05	8.46709e-05	-8.81625e-05	0.000127324	0.0826587	0.0742254	1.98178e-05	0.00013069	0.0592061	0.0535433	0.705898	0.638705		0.854805			5.91297e-05	2.56663e-05	0.00463749	2.49379e-05	1.82718e-05	0.0819868	1.47289e-05	0.059193	0.705816					0.712094	0.000142801	200.537	413.082	56				0.711762	0.000290438
14	MAD02-Seq2-13um				0.000476672	0.00013106	4.4853e-05	0.000114151	0.00663827	0.00459185	2.27668e-05	0.000104517	-9.31449e-05	0.000126414	0.0808565	0.0811464	1.50482e-05	0.000101988	0.0578925	0.0585549	0.690379	0.698387		0.836012			4.54873e-05	3.72752e-05	0.00455079	1.95798e-05	2.98315e-06	0.0801775	1.24848e-05	0.0578791	0.690301					0.711946	0.00014597	205.03	204.535	57				0.711591	0.000241219
15	MAD03-Seq2-13um				0.000479274	0.000136857	4.25824e-05	0.000125029	0.00659038	0.004496	2.25114e-05	0.000122724	-9.20407e-05	0.000145953	0.079994	0.0793724	5.9535e-06	0.000113295	0.0572684	0.0573097	0.682949	0.683168		0.827015			5.07659e-05	3.73677e-05	0.004498	1.43632e-05	8.37272e-06	0.079317	9.91166e-06	0.0572539	0.682867					0.711835	0.000209437	294.221	49.3933	57				0.711595	0.000329447
16	MAD01-Seq1-13um				0.000455931	0.000134121	3.37683e-05	0.000115896	0.00675853	0.0048046	2.74151e-05	0.000122542	-9.21389e-05	0.000130287	0.0850867	0.0848002	1.25716e-05	0.000112806	0.0609798	0.0612249	0.727151	0.730086		0.880542			5.29193e-05	1.92686e-05	0.00478227	1.84911e-05	8.61679e-06	0.0844639	1.30067e-05	0.0609709	0.727065					0.711994	0.000166688	234.115	271.99	57				0.711606	0.000235039
17	MAD02-Seq1-13um				0.00045359	0.000143153	3.49899e-05	0.000113092	0.00671303	0.00452854	2.26477e-05	0.000115262	-9.51544e-05	0.000128438	0.0842459	0.0801022	1.39871e-05	0.000114205	0.0603771	0.0577994	0.719923	0.689427		0.871789			4.20013e-05	2.57947e-05	0.00473088	2.13686e-05	7.85868e-06	0.0836215	1.95026e-06	0.0603616	0.719836					0.711936	0.000153803	216.035	190.804	57				0.711832	0.000282253
18	MAD03-Seq1-13um				0.000448694	0.000142086	3.45104e-05	0.000147007	0.00671928	0.00444454	2.16754e-05	0.000119459	-9.70682e-05	0.000111	0.0844985	0.0785027	1.80111e-05	0.000116618	0.0605577	0.0566309	0.722181	0.675569		0.874523			4.25968e-05	2.29775e-05	0.00473496	1.10367e-05	4.62285e-06	0.0838771	7.8649e-06	0.0605463	0.722093					0.711974	0.000152453	214.127	244.993	57				0.711688	0.000235697
19	MAD01-Seq2-13um				0.000454671	0.000108059	3.42523e-05	0.000121978	0.00680487	0.00457633	2.04623e-05	9.85257e-05	-9.61754e-05	0.000123939	0.0859288	0.0809116	1.49077e-05	0.000104422	0.0615885	0.0584363	0.73441	0.696492		0.889332			4.58597e-05	2.57651e-05	0.00482969	1.96887e-05	8.28594e-06	0.0853068	3.09092e-06	0.0615782	0.734326					0.711925	0.000135079	189.738	174.92	57				0.71186	0.000200883
20	MAD02-Seq2-13um				0.000450403	0.000119969	4.22128e-05	0.000139078	0.00681824	0.00432124	1.69493e-05	0.000115402	-9.06303e-05	0.000123158	0.0862725	0.0763999	1.7871e-05	0.00010845	0.0618363	0.0551597	0.737356	0.657364		0.892898			3.89884e-05	3.52723e-05	0.00483288	8.1856e-06	6.19422e-06	0.0856459	3.59688e-06	0.0618224	0.737264					0.711904	0.000170769	239.877	145.6	56				0.711872	0.000206481
21	MAD03-Seq2-13um				0.000454905	0.000102761	3.8389e-05	0.000118152	0.00666582	0.00460987	2.45429e-05	0.000119966	-8.91038e-05	0.000126846	0.0833923	0.0815403	1.21103e-05	0.000117671	0.0597567	0.058855	0.712544	0.70174		0.862853			4.14758e-05	2.53615e-05	0.004682	2.07017e-05	3.85652e-06	0.0827648	2.13502e-06	0.0597457	0.712457					0.712046	0.000184352	258.904	346.238	56				0.711981	0.000283856
																																						Average	0.71193							Average	0.711783
																																						2 s.d.	0.000213939							2 s.d.	0.000428983
																																						2 s.d. ppm	300.505							2 s.d. ppm	602.688
01	MAD01-Seq3-10um				0.000437862	0.000115311	2.37181e-05	0.000133925	0.00446178	0.00316952	8.41932e-06	0.000118073	-9.42117e-05	0.000173388	0.0444743	0.055751	6.239e-06	0.000111213	0.0316455	0.0402596	0.377389	0.479676		0.456998			3.09927e-05	1.57282e-05	0.00249077	7.57451e-06	8.12324e-06	0.0438569	2.2009e-06	0.0316362	0.377326					0.711627	0.0003139	441.102	-243.072	57				0.711295	0.000577597
02	MAD02-Seq3-10um				0.000439315	0.000139076	2.00572e-05	0.000128225	0.00439605	0.00306569	3.63134e-06	0.00010683	-9.51802e-05	0.000122795	0.0434629	0.0541772	3.38231e-06	0.000114323	0.0309294	0.0391171	0.368805	0.466367		0.446604			2.54585e-05	1.21781e-05	0.00242207	4.93275e-06	5.64611e-06	0.0428446	4.53994e-06	0.0309242	0.368737					0.711883	0.000314227	441.403	116.551	58				0.711637	0.000604985
03	MAD03-Seq3-10um				0.000435447	0.000107188	2.67579e-05	0.00011436	0.00445494	0.00310933	8.18975e-06	0.000112412	-9.86772e-05	0.000139034	0.0445869	0.0548726	7.16387e-06	0.000128202	0.0317334	0.0396316	0.378396	0.472431		0.458217			2.22834e-05	2.15859e-05	0.00247828	9.56379e-06	-4.5347e-06	0.0439651	8.77486e-07	0.0317203	0.378326					0.71171	0.00028472	400.051	-126.276	56				0.711592	0.000622134
04	MAD01-Seq4-10um				0.000436481	0.000130882	1.94998e-05	0.000114972	0.00452818	0.00312104	6.41282e-07	9.54522e-05	-9.00573e-05	0.000143782	0.0457118	0.055325	7.61137e-06	0.000125515	0.0325517	0.0398924	0.388138	0.475803		0.470015			2.68172e-05	1.21751e-05	0.00255912	-1.48775e-06	1.88548e-06	0.0450912	3.47777e-06	0.0325416	0.388065					0.711856	0.000273391	384.053	79.2694	57				0.711753	0.000463065
05	MAD02-Seq4-10um				0.000433427	0.000128779	1.78103e-05	0.000127305	0.00442609	0.00305269	3.2063e-06	0.000111028	-9.7767e-05	0.000130194	0.0439618	0.053797	7.97973e-06	0.000100293	0.0312913	0.0388334	0.373088	0.462988		0.45179			2.40606e-05	8.88272e-06	0.00245164	4.26793e-06	5.43506e-07	0.043344	6.47497e-06	0.0312777	0.373021					0.711794	0.000355881	499.978	-7.93062	58				0.711598	0.000546374
06	MAD03-Seq4-10um				0.000432263	0.000104228	2.47629e-05	0.000116291	0.0044221	0.00305485	1.34541e-05	0.000110713	-9.75398e-05	0.000138405	0.0438559	0.0540339	5.78954e-06	0.000115021	0.0312133	0.0389904	0.372245	0.46484		0.450769			2.70286e-05	1.62517e-05	0.00244715	6.78585e-06	-5.33872e-06	0.0432368	4.27766e-06	0.0312062	0.372169					0.711931	0.000288961	405.884	184.503	57				0.711577	0.000505019
07	MAD01-Seq6-10um				0.000439076	0.000127225	1.74004e-05	0.000118529	0.00449904	0.00313278	2.29706e-05	0.000138527	-9.71753e-05	0.000135649	0.0450725	0.0554585	2.41699e-08	0.000124591	0.0320933	0.0400269	0.382569	0.477058		0.463271			2.21945e-05	8.36774e-06	0.00251762	2.5392e-05	-1.85261e-06	0.044447	2.05411e-06	0.0320755	0.382488					0.711736	0.000279844	393.185	-90.5017	56				0.711562	0.000527566
08	MAD02-Seq6-10um				0.000444778	0.000126545	2.77066e-05	0.000121963	0.00447122	0.00298006	2.62007e-05	0.000111051	-9.33287e-05	0.000118325	0.0444706	0.0528209	5.26036e-06	0.000112406	0.0316529	0.0381235	0.377391	0.454465		0.457			2.8497e-05	1.74425e-05	0.00248404	1.53647e-05	6.07924e-06	0.0438516	7.86545e-07	0.0316404	0.3773					0.711759	0.000268208	376.823	-57.3706	56				0.711747	0.000465157
09	MAD03-Seq6-10um				0.000443367	0.000104748	3.03006e-05	0.000123097	0.00455293	0.00314514	1.86516e-05	0.000121591	-8.56232e-05	0.000119788	0.0460231	0.0555407	7.50401e-06	0.000116095	0.0327661	0.0400464	0.390774	0.47778		0.473207			3.55375e-05	1.98348e-05	0.00256017	5.27978e-06	5.8372e-06	0.0453961	1.03365e-07	0.0327542	0.390685					0.711733	0.000229691	322.721	-93.5815	58				0.711579	0.000428519
10	MAD01-Seq1-10um				0.000443917	0.000121298	2.88927e-05	0.000122813	0.00431281	0.00284971	2.80753e-05	0.000111326	-9.1117e-05	0.000133707	0.0406959	0.0503824	1.03299e-05	0.000107311	0.0289247	0.0363935	0.345028	0.434098		0.41781			2.29344e-05	1.69747e-05	0.00227678	1.43893e-05	3.19114e-06	0.0400563	7.61633e-06	0.0289174	0.344972					0.711862	0.000236017	331.549	86.4401	54				0.711241	0.000458417
11	MAD02-Seq1-10um				0.000443828	0.000124431	2.35681e-05	0.000133506	0.00433532	0.00290585	1.90457e-05	0.000129122	-9.53627e-05	0.000139505	0.0410662	0.0506767	1.20807e-05	0.000113124	0.0292005	0.0365963	0.348214	0.43655		0.421668			2.43351e-05	1.89616e-05	0.00229431	6.65125e-06	-2.89661e-06	0.0404211	5.47184e-06	0.0291894	0.348149					0.712057	0.000330993	464.841	361.361	56				0.71156	0.000580578
12	MAD03-Seq1-10um				0.000445496	0.000138589	2.01648e-05	0.000112682	0.00431536	0.00280004	2.65509e-05	9.62001e-05	-8.43728e-05	0.000149121	0.0408639	0.049365	7.38647e-06	0.000119146	0.0290506	0.0356513	0.346482	0.425112		0.419571			2.96841e-05	2.29273e-05	0.00227623	8.42454e-06	-3.66425e-06	0.0402217	1.88986e-06	0.0290392	0.346419					0.711869	0.000248342	348.858	97.2259	57				0.711827	0.00060271
13	MAD01-Seq2-10um				0.000447056	0.000117571	1.80571e-05	0.000144914	0.00430958	0.00290467	2.4741e-05	0.000110716	-9.39906e-05	0.000116782	0.0405656	0.0512947	8.68951e-06	0.000106268	0.028834	0.0370188	0.343939	0.441714		0.416491			2.3497e-05	1.62019e-05	0.00226772	1.62499e-05	-5.25179e-06	0.0399235	3.37899e-07	0.0288184	0.343873					0.71187	0.000352819	495.624	97.9085	58				0.711682	0.000607336
14	MAD02-Seq2-10um				0.000441936	0.00014633	1.81066e-05	0.000135213	0.0043366	0.00287851	2.35944e-05	0.000132091	-9.15339e-05	0.000118539	0.0412436	0.0508983	1.17871e-05	0.000126666	0.0293167	0.0367372	0.349705	0.438132		0.423474			3.03038e-05	1.47993e-05	0.00230126	9.74605e-06	1.13593e-06	0.0406037	-2.22019e-06	0.0293029	0.349636					0.711548	0.000322216	452.838	-353.399	57				0.711678	0.000533507
15	MAD03-Seq2-10um				0.000445551	0.0001143	2.12893e-05	0.000123801	0.00431765	0.00281786	2.78483e-05	0.000130008	-8.82181e-05	0.000124012	0.0408574	0.0497899	9.90985e-06	0.000101093	0.0290477	0.0359407	0.346354	0.428733		0.419417			2.48423e-05	1.59785e-05	0.00228284	1.36035e-05	8.3525e-06	0.0402094	2.3161e-06	0.0290386	0.346284					0.712131	0.000293001	411.443	465.334	57				0.711979	0.000570906
16	MAD01-Seq3-10um				0.000440043	0.000132153	1.8741e-05	0.000123203	0.00432716	0.0028695	2.16501e-05	8.98949e-05	-8.90317e-05	0.000125122	0.0411174	0.0510352	2.45944e-06	0.000110296	0.0292265	0.0368061	0.348592	0.439267		0.422127			2.68596e-05	1.55257e-05	0.0022882	9.83159e-06	-1.48957e-06	0.0404755	-4.77333e-07	0.0292208	0.348524					0.71194	0.000267615	375.895	197.345	58				0.711972	0.000405796
17	MAD02-Seq3-10um				0.000438855	0.000124619	2.02343e-05	0.000124266	0.00431582	0.00284247	3.07703e-05	0.000115736	-8.36564e-05	0.000121063	0.0408709	0.0500573	1.42911e-05	0.000131239	0.0290611	0.0361529	0.346486	0.431219		0.419576			3.11583e-05	1.81428e-05	0.00227453	1.87361e-05	7.396e-06	0.0402246	1.0465e-05	0.0290478	0.346417					0.712181	0.000344203	483.308	535.035	58				0.711612	0.000539796
18	MAD03-Seq3-10um				0.000453185	0.0001167	2.04067e-05	0.000112213	0.0043483	0.00294118	3.29202e-05	0.000131761	-7.91338e-05	0.000136667	0.0414896	0.0512719	2.63112e-06	0.00012248	0.0294958	0.037019	0.351864	0.441446		0.426089			3.95081e-05	1.80905e-05	0.00230799	1.7063e-05	1.43412e-05	0.0408481	-1.3105e-06	0.0294855	0.351791					0.711703	0.000347501	488.267	-136.752	58				0.711852	0.000504658
19	MAD01-Seq4-10um				0.000445476	0.000116012	2.64455e-05	0.000119008	0.00425893	0.00276587	3.22035e-05	0.000125253	-8.75193e-05	0.000100962	0.0399246	0.0485181	6.19366e-06	0.000118261	0.0283716	0.0350428	0.338376	0.417932		0.409755			2.03553e-05	1.54283e-05	0.00222262	1.76076e-05	-3.40216e-07	0.0392823	-3.82389e-06	0.028361	0.338309					0.711899	0.000295714	415.387	139.532	57				0.711985	0.000491657
20	MAD02-Seq4-10um				0.00044812	0.000149516	2.16699e-05	0.000108384	0.0042566	0.00268219	2.51959e-05	9.79625e-05	-8.30302e-05	0.000131074	0.0399452	0.0475878	2.10295e-05	0.0001019	0.0283823	0.0343711	0.338604	0.409779		0.410032			3.06682e-05	2.29649e-05	0.00222055	1.06754e-05	9.20786e-06	0.0393054	1.43469e-05	0.0283667	0.338534					0.711491	0.000345508	485.611	-433.933	57				0.710647	0.000634122
21	MAD03-Seq4-10um				0.000444047	0.00011852	2.44444e-05	0.000110562	0.00428389	0.0028193	2.41709e-05	0.000117867	-8.63087e-05	0.000110271	0.040256	0.0493989	1.16507e-05	9.39533e-05	0.0286113	0.0356969	0.341197	0.425367		0.413171			2.97483e-05	1.64565e-05	0.00224731	9.38267e-06	4.33745e-06	0.0396123	1.63264e-06	0.0285982	0.341124					0.711791	0.00028327	397.968	-12.1407	55				0.711923	0.000501169
																																						Average	0.711827							Average	0.711633
																																						2 s.d.	0.000344129							2 s.d.	0.000603391
																																						2 s.d. ppm	483.445							2 s.d. ppm	847.896
01	Sly01-Seq7-50um				0.000407178	0.000137766	8.86268e-06	0.000128613	0.00200372	0.000142791	-3.86237e-07	0.00011543	-0.000106507	0.000124032	0.000704755	0.000125429	1.7725e-06	0.000128586	6.47685e-05	0.000135764	0.000656344	0.000110757		8.56625			0.000179785	6.02521e-05	0.0467115	8.58365e-05	1.74164e-05	0.822898	3.1163e-05	0.590182	7.07336					0.707876	6.37371e-05	90.04	276.737	58				0.707799	6.84377e-05
02	Sly02-Seq7-50um				0.000413692	0.000136057	9.94838e-06	0.000124156	0.00199716	0.000124284	3.32894e-06	0.0001443	-0.000119787	0.000119829	0.000709934	0.000109332	2.63881e-06	0.000114168	7.71631e-05	0.000125535	0.000718121	0.00014188		8.75767			0.000182501	6.03304e-05	0.0477858	9.9823e-05	3.2129e-05	0.841312	2.27492e-05	0.603358	7.23137					0.707841	6.10791e-05	86.2893	227.568	59				0.707769	6.7217e-05
03	Sly03-Seq7-50um				0.000415249	0.000130708	6.82463e-06	9.57639e-05	0.0020006	0.000141859	5.026e-06	0.000126121	-0.000111908	0.000123365	0.000719633	9.70775e-05	7.91173e-06	0.000111546	7.74677e-05	0.000109439	0.000762841	0.000129924		8.9213			0.000179485	5.9619e-05	0.0486821	6.04411e-05	3.45423e-05	0.857052	3.10366e-05	0.614627	7.36644					0.707828	6.77293e-05	95.6861	209.229	59				0.707785	7.27111e-05
04	Sly01-Seq8-50um				0.000419833	9.97909e-05	4.51955e-06	0.000120306	0.00200352	0.000137519	5.37754e-06	0.000125108	-0.000101558	0.000126838	0.00073178	9.68248e-05	1.03307e-05	9.69354e-05	9.07595e-05	0.000114075	0.00084903	0.000144543		9.25895			0.000191759	6.57173e-05	0.0505127	9.67882e-05	2.40988e-05	0.889323	2.6911e-05	0.637863	7.64519					0.707865	5.56453e-05	78.6101	260.746	56				0.707798	6.23834e-05
05	Sly02-Seq8-50um				0.000420156	0.000130566	6.48552e-06	9.65721e-05	0.00200472	0.000137208	-3.68157e-06	0.000142616	-0.000107473	0.000133857	0.000733622	0.000103363	1.58551e-05	0.000105262	9.18637e-05	0.000134502	0.000850574	0.000153559		8.33225			0.000160974	5.23288e-05	0.0454653	0.000109841	1.8873e-05	0.800536	1.73364e-05	0.574111	6.87992					0.707888	5.87337e-05	82.9704	293.929	57				0.70783	5.50786e-05
06	Sly03-Seq8-50um				0.000411187	0.000103654	-4.52959e-06	0.000100303	0.00200473	0.000133508	5.27934e-06	0.000101844	-0.000114476	0.000119686	0.000735245	0.000101872	1.78395e-06	9.84182e-05	8.99779e-05	9.69028e-05	0.000847163	0.00013188		9.33115			0.000198768	7.51939e-05	0.05089	6.61724e-05	3.44021e-05	0.896235	3.33671e-05	0.642752	7.70482					0.707798	5.56868e-05	78.6762	166.089	58				0.707713	5.7638e-05
07	Sly01-Seq9-50um				0.000414791	0.000122533	1.71203e-05	0.00011537	0.00199457	0.00013939	4.5419e-06	0.000103956	-0.000106389	0.000148351	0.000736377	0.000116575	5.30038e-06	0.000111141	9.71937e-05	0.000109892	0.000914561	0.00014433		9.23282			0.000187627	5.12966e-05	0.0503567	0.000126295	1.97453e-05	0.886808	2.58657e-05	0.635989	7.62355					0.707792	5.79266e-05	81.8413	157.829	57				0.707737	6.46064e-05
08	Sly02-Seq9-50um				0.00042035	0.00011537	3.36531e-06	0.000114845	0.00200325	0.000127151	5.92414e-06	0.00010653	-0.000104801	0.000123764	0.000744456	0.000119103	5.16459e-06	0.000129619	9.6936e-05	9.01807e-05	0.000915763	0.000112021		9.38174			0.000185467	6.77962e-05	0.0511607	7.9067e-05	1.37371e-05	0.901026	2.04459e-05	0.646211	7.74652					0.707795	6.37182e-05	90.0235	162.398	60				0.707743	5.87859e-05
09	Sly03-Seq9-50um				0.000415972	0.000124425	-2.67907e-06	0.0001243	0.00199421	0.000173416	-1.22316e-06	9.43941e-05	-0.000113439	0.000130806	0.00073914	0.000102725	7.10191e-06	0.000146552	9.75191e-05	9.73288e-05	0.000913643	0.000146002		9.39024			0.000191489	6.92907e-05	0.0512281	7.2888e-05	3.61539e-05	0.901892	3.28448e-05	0.646802	7.75353					0.707782	6.04191e-05	85.364	144.601	60				0.707709	6.19018e-05
10	Sly01-Seq1-50um				0.000441624	0.00010191	3.87785e-06	0.000136256	0.00211441	0.000168124	-5.33417e-06	0.000108349	-0.000104397	0.000112576	0.000674278	0.000119657	6.75568e-06	0.000113018	1.59166e-05	0.000107846	0.000154769	0.000136227		8.54419			0.00016879	6.34226e-05	0.0465092	8.07219e-05	2.42986e-05	0.820254	3.04231e-05	0.588437	7.05563					0.707822	5.41239e-05	76.4654	200.761	58				0.70775	5.7149e-05
11	Sly02-Seq1-50um				0.000438717	0.00011828	7.49483e-06	0.000122074	0.00209505	0.00016	1.98697e-06	0.000103459	-0.00010025	0.00010528	0.00069283	8.39876e-05	1.44505e-05	9.90237e-05	4.27441e-05	0.000115457	0.000380461	0.000120441		8.47793			0.000169328	5.78545e-05	0.0461313	7.35258e-05	1.63021e-05	0.813829	1.81459e-05	0.583869	7.0007					0.707822	6.57048e-05	92.8268	200.278	57				0.707742	7.03605e-05
12	Sly03-Seq1-50um				0.000434461	0.000150837	4.28186e-06	9.3054e-05	0.00208294	0.000140715	-1.25066e-06	0.000112644	-9.88487e-05	0.000130358	0.0007151	0.000113054	9.22224e-06	0.000123697	4.9465e-05	0.000106116	0.000520704	0.000158713		8.77385			0.000185229	7.05236e-05	0.0477696	0.000160068	1.42353e-05	0.842229	1.69676e-05	0.604255	7.24493					0.707845	5.66816e-05	80.0762	233.262	59				0.707776	5.56763e-05
13	Sly01-Seq2-50um				0.000431793	0.000125049	1.11533e-05	9.49146e-05	0.00208296	0.000147918	-9.72168e-06	0.000104323	-0.000108446	0.000121769	0.000704981	0.000106169	-5.26275e-06	0.000122753	4.36139e-05	9.32831e-05	0.000462562	0.000120032		8.68778			0.000185649	6.17592e-05	0.0472916	0.000131569	2.96339e-05	0.8339	3.02086e-05	0.598291	7.17391					0.707833	5.62451e-05	79.461	216.142	58				0.707706	5.7007e-05
14	Sly02-Seq2-50um				0.000436271	0.000100509	1.43634e-05	0.000126715	0.0020882	0.000171404	2.16628e-06	0.00011261	-9.96665e-05	0.000107774	0.000727742	0.000104098	8.82333e-07	0.000105503	6.23157e-05	0.000139116	0.000605285	0.000140663		9.01802			0.000201111	7.16776e-05	0.0490788	6.62801e-05	1.67037e-05	0.865532	2.65499e-05	0.620973	7.44648					0.707817	5.45357e-05	77.0477	194.262	56				0.707736	5.85244e-05
15	Sly01-Seq5-50um				0.000402043	0.000126366	1.01597e-05	0.00012865	0.00195282	0.000138493	5.91731e-06	0.000107145	-0.000101753	0.000136712	0.000642148	0.00010814	-1.74671e-06	0.000114996	3.62925e-05	0.000128947	0.000276398	0.000128578		8.86359			0.000219707	9.41407e-05	0.0482369	8.87611e-05	3.2455e-05	0.850268	3.17164e-05	0.61016	7.31927					0.707754	4.08021e-05	57.65	105.18	57				0.707682	4.62809e-05
16	Sly02-Seq5-50um				0.000403185	0.00011625	9.56853e-06	0.000114657	0.00195715	0.000142758	5.69611e-06	0.000104628	-9.85758e-05	0.000118638	0.000657652	0.000105744	-2.86736e-06	0.000126539	4.38114e-05	0.00012774	0.000393148	0.000164951		8.87703			0.000220696	9.42477e-05	0.0483082	9.96629e-05	3.04955e-05	0.851546	2.96357e-05	0.611093	7.33026					0.707775	4.30501e-05	60.8246	134.123	56				0.707695	4.57603e-05
17	Sly01-Seq6-50um				0.000401211	0.000119923	8.19528e-06	0.00011713	0.00195037	0.000151906	4.33414e-06	0.000111095	-0.000101829	0.000109554	0.000645976	0.000120758	1.77752e-06	0.000124077	3.79812e-05	0.000118116	0.000291698	0.000121297		8.54761			0.000215666	9.4986e-05	0.0465811	8.21922e-05	4.44087e-05	0.820389	3.04145e-05	0.588606	7.05832					0.707823	4.06268e-05	57.3968	202.548	55				0.707732	5.40925e-05
18	Sly02-Seq6-50um				0.000406663	0.000122501	1.11522e-05	0.000125759	0.0019615	0.000145847	1.27438e-07	0.000109535	-0.00010212	0.000119734	0.000670992	0.000117055	3.73649e-07	0.000113342	5.78489e-05	0.000112762	0.000491827	0.000187338		8.79569			0.000200178	8.28282e-05	0.0478873	8.55284e-05	3.73089e-05	0.843935	2.63785e-05	0.605565	7.26299					0.707789	4.99689e-05	70.5986	154.696	57				0.707721	5.31571e-05
19	Sly03-Seq6-50um				0.000403296	0.000117114	1.19542e-05	0.000116918	0.00196457	0.000149753	1.11982e-06	0.000103361	-9.90149e-05	0.000132464	0.000666224	0.000125335	-2.18338e-06	0.000116409	5.76833e-05	0.000123375	0.000509152	0.000187062		8.81465			0.000199366	8.42436e-05	0.0479825	8.53167e-05	2.90745e-05	0.845883	3.36705e-05	0.606899	7.27863					0.707769	5.694e-05	80.45	125.288	58				0.707694	5.6587e-05
																																						Average	0.707817							Average	0.707743
																																						2 s.d.	7.31496e-05							2 s.d.	8.1596e-05
																																						2 s.d. ppm	103.345							2 s.d. ppm	115.29
01	Sly01-Seq4-25um				0.00044797	0.000134052	1.01906e-05	0.000112399	0.00214616	0.000126782	7.73214e-06	0.000108072	-0.000105608	0.000128382	0.000689901	0.000128547	-2.80307e-07	0.000111158	2.10665e-05	0.000113753	0.0001743	0.000143935		2.42241			4.55326e-05	2.28508e-05	0.0131991	2.3e-05	1.30961e-05	0.232601	6.57312e-06	0.166847	2.00026					0.707792	7.55419e-05	106.729	158.106	56				0.707758	0.000107914
02	Sly02-Seq4-25um				0.000437308	0.000118729	8.09699e-06	0.00015192	0.0021187	0.00013152	9.50875e-06	0.000107199	-0.000106959	0.000136518	0.000697603	0.000108046	5.40603e-08	0.000125819	3.2129e-05	0.000119324	0.000223437	0.000112153		2.42187			5.45017e-05	3.83592e-06	0.0132225	3.62262e-05	1.38407e-05	0.232566	1.68502e-05	0.166804	1.99976					0.707746	9.37168e-05	132.416	93.1153	56				0.707568	0.00011914
03	Sly03-Seq4-25um				0.000427828	0.000106036	1.05389e-05	0.000133936	0.0021307	0.000130144	1.6663e-05	0.000113315	-8.6869e-05	0.000149997	0.000688669	0.000127486	1.38232e-05	9.97734e-05	3.21703e-05	0.000112995	0.00024278	0.000139847		2.42219			6.35128e-05	1.44015e-05	0.0132022	2.72908e-05	-5.7292e-06	0.232591	-6.35307e-06	0.166812	2					0.707724	9.15274e-05	129.326	62.763	57				0.707723	0.000113294
04	Sly01-Seq5-25um				0.000436977	0.000104312	1.1729e-05	0.000145948	0.00211572	0.000146754	7.65973e-06	0.000133413	-0.000105066	0.000129979	0.000691438	0.000125101	1.53832e-06	9.93372e-05	2.23214e-05	0.000117437	0.000243202	0.000118099		2.44525			5.6681e-05	7.12935e-06	0.013356	3.0349e-05	1.44651e-05	0.234794	1.39739e-05	0.168423	2.01904					0.707853	8.48617e-05	119.886	244.837	58				0.707683	0.000108154
05	Sly02-Seq5-25um				0.000432847	0.000118859	1.74908e-05	0.000129888	0.00212185	0.000177521	1.32502e-05	9.95309e-05	-0.00011118	0.000122852	0.000697343	0.000121261	-1.77065e-06	0.00012303	3.37122e-05	0.000109752	0.000278647	0.000122886		2.45512			7.19728e-05	1.25231e-05	0.013398	2.28772e-05	1.1506e-05	0.235742	7.61512e-06	0.169106	2.02716					0.707876	9.23386e-05	130.445	276.303	57				0.707761	0.000118407
06	Sly03-Seq5-25um				0.000430856	0.000106858	4.13755e-06	0.000143573	0.00212145	0.00011252	1.2472e-05	0.000130778	-9.90265e-05	0.000106669	0.000704491	0.000110217	2.06206e-06	0.000123986	3.21736e-05	0.000135571	0.000293645	0.000133745		2.55492			4.97955e-05	2.43329e-05	0.0139352	1.7416e-05	6.55284e-06	0.24533	4.03409e-06	0.175962	2.10956					0.707767	8.32764e-05	117.661	123.54	56				0.707687	0.000106883
07	Sly01-Seq6-25um				0.000424097	0.000131118	5.38697e-06	0.000146974	0.0021003	0.000120932	1.191e-05	0.000117914	-9.5178e-05	0.000151618	0.000701637	0.000118399	2.82186e-06	0.000104521	1.68849e-05	0.000119656	0.000275647	0.000122405		2.40714			5.90427e-05	3.09648e-05	0.0131509	6.5573e-06	-7.13824e-06	0.231164	8.89476e-06	0.165814	1.98754					0.70786	0.000109148	154.194	253.856	59				0.707802	0.000145676
08	Sly02-Seq6-25um				0.000418886	0.000122889	2.31398e-06	0.000137587	0.0020994	0.000141012	9.63333e-06	0.000102535	-0.000117021	0.000145715	0.000686786	0.000113708	5.52793e-06	0.000113015	2.80184e-05	0.000123603	0.000281379	0.000126371		2.58371			7.89356e-05	3.09931e-05	0.0141005	2.05689e-05	1.90907e-05	0.248114	1.33751e-05	0.177948	2.13335					0.707762	0.000102749	145.174	116.067	58				0.70769	0.00010351
09	Sly03-Seq6-25um				0.000442105	9.85404e-05	9.20305e-06	0.000115367	0.00210998	0.000123957	1.30572e-05	0.000120164	-0.000116331	0.000122659	0.000696292	0.000137946	9.83965e-06	0.000104292	2.97969e-05	0.000114775	0.000307385	0.000119992		2.35581			5.64984e-05	7.56228e-06	0.0128611	1.85373e-05	1.10919e-05	0.226243	6.70879e-06	0.162295	1.94512					0.707941	8.48562e-05	119.863	369.114	56				0.707844	0.000113343
10	Sly01-Seq2-25um				0.000433035	0.000120766	3.83398e-06	0.000117875	0.00209873	0.000151701	-6.51101e-07	0.000107027	-9.60641e-05	0.000130231	0.000678401	0.000109653	9.36604e-06	0.000117868	2.68049e-05	0.000116895	0.000231393	0.000128491		2.44546			5.0986e-05	2.524e-05	0.013291	8.81744e-05	1.80298e-05	0.234511	6.06922e-06	0.168331	2.01923					0.707828	9.27435e-05	131.026	208.68	56				0.707691	0.000121803
11	Sly02-Seq2-25um				0.000429903	0.000115585	9.30542e-06	0.000127683	0.00207382	0.000131655	-4.072e-06	0.000117851	-9.14987e-05	0.000116712	0.000675444	9.83346e-05	1.33654e-05	0.000123979	2.54108e-05	0.000107172	0.00020632	0.000133423		2.47969			6.48754e-05	2.58608e-05	0.0135039	1.74507e-05	1.47372e-05	0.237794	1.9286e-06	0.170663	2.04752					0.707754	7.96349e-05	112.518	104.564	59				0.70772	0.000103431
12	Sly03-Seq2-25um				0.00042588	0.00012172	7.574e-06	0.000113054	0.00206895	0.000129094	2.96687e-06	0.000121882	-9.66834e-05	0.000117598	0.000665193	0.000115746	1.08595e-05	0.000116633	1.80629e-05	0.000124452	0.000198988	0.000133197		2.47367			6.38498e-05	2.3102e-05	0.0134809	2.25257e-05	1.33901e-05	0.237226	6.17715e-07	0.170274	2.04256					0.707829	9.27547e-05	131.041	210.768	57				0.707847	0.000128693
13	Sly01-Seq3-25um				0.000420501	0.000118673	6.26408e-06	0.000105217	0.00207183	0.000135456	-1.10794e-06	0.000143503	-8.70258e-05	0.000118932	0.000667098	0.000116363	1.37172e-05	0.000115627	1.82155e-05	9.71973e-05	0.000185824	0.000122427		2.46796			6.09567e-05	2.27639e-05	0.0134427	1.77821e-05	5.27693e-06	0.236669	8.61959e-07	0.169875	2.03786					0.707853	8.36595e-05	118.188	243.858	58				0.707821	0.00011065
14	Sly02-Seq3-25um				0.000422535	0.000127668	6.13737e-06	0.000121378	0.0020713	0.000133877	-5.10201e-06	0.000111905	-8.84001e-05	0.000130438	0.000667768	0.000111844	4.59381e-06	0.000105396	1.71287e-05	0.00012491	0.000193087	0.000147534		2.43306			6.01546e-05	2.23153e-05	0.0132518	3.54454e-05	8.53559e-06	0.233373	1.22418e-05	0.167489	2.00902					0.707799	9.40059e-05	132.814	168.482	57				0.707653	0.000108507
15	Sly03-Seq3-25um				0.000424357	0.000123778	9.01093e-06	0.000127104	0.00206136	0.000135074	-9.8877e-06	0.000103742	-9.01064e-05	0.000120306	0.000670186	0.000113637	1.72339e-06	0.000113565	1.82964e-05	0.000104858	0.000195441	0.000111637		2.28661			5.51423e-05	2.66774e-05	0.0124751	3.28995e-05	1.86108e-05	0.21939	1.23488e-05	0.157427	1.88808					0.707802	8.89826e-05	125.717	171.892	58				0.707641	0.000106251
16	Sly01-Seq4-25um				0.000423974	0.000114936	4.42014e-06	0.00012978	0.00206416	0.00014731	-5.21493e-06	0.000119313	-8.63611e-05	0.000129091	0.000667163	0.000120686	6.50332e-06	0.000113156	1.52919e-05	0.000125804	0.000201743	0.000133051		2.39761			7.33916e-05	2.17456e-05	0.0130703	1.77388e-05	9.29123e-06	0.230003	1.38616e-05	0.165033	1.97974					0.707753	8.90495e-05	125.82	103.506	57				0.70762	0.0001195
17	Sly02-Seq4-25um				0.000420009	0.000142719	1.01732e-05	0.000137472	0.00206681	0.00015031	7.20332e-08	0.000125501	-9.28582e-05	0.00012022	0.000668436	0.000109708	6.35168e-06	0.000125547	1.19595e-05	0.000114306	0.000195265	0.000122675		2.4097			5.70849e-05	2.17495e-05	0.0131346	1.51763e-05	9.52853e-06	0.231136	1.06426e-05	0.165856	1.98974					0.707684	9.17724e-05	129.68	5.48055	56				0.707577	0.000122365
18	Sly03-Seq4-25um				0.000425043	0.000106813	7.58498e-06	0.000118852	0.00205582	0.000149786	-3.9577e-06	0.000102498	-9.71671e-05	0.000128642	0.000667273	0.000113962	7.45479e-06	0.000128451	1.72045e-05	0.000108541	0.000199504	0.000135217		2.39576			6.32673e-05	2.76156e-05	0.0130645	2.65347e-05	1.36663e-05	0.229808	8.53224e-06	0.164918	1.97822					0.707792	8.44272e-05	119.283	157.679	55				0.707634	0.0001135
19	Sly01-Seq5-25um				0.000406337	0.000118298	1.04011e-05	0.000130506	0.00197245	0.000132105	9.19504e-06	0.000119894	-9.83172e-05	0.000135151	0.000637769	0.000117667	-1.61837e-06	0.00011425	1.74731e-05	0.000130179	0.000136197	0.000117118		2.34614			4.97133e-05	2.06296e-05	0.0127765	2.60462e-05	5.98864e-06	0.225176	1.96088e-06	0.161544	1.93731					0.707739	0.000103654	146.457	83.3826	59				0.707706	0.000107263
20	Sly02-Seq5-25um				0.00041062	0.000110711	5.40466e-06	0.00012275	0.00195905	0.000135665	6.79559e-06	0.000111191	-9.85487e-05	0.000101628	0.000633794	0.000118118	-5.86909e-06	0.000102678	2.14188e-05	0.00012779	0.000156314	0.000130465		2.31414			5.18847e-05	2.68764e-05	0.0126049	3.56953e-05	1.39147e-05	0.222051	1.86051e-05	0.159329	1.91086					0.707776	9.33036e-05	131.826	135.717	57				0.707589	0.000123944
21	Sly03-Seq5-25um				0.000406622	0.000115293	7.3976e-06	0.000117943	0.00196588	0.00013094	1.15271e-05	0.000117693	-9.63258e-05	0.000125569	0.000637293	0.00010101	-2.19584e-07	0.000113788	1.98287e-05	0.00012717	0.000171026	0.000117787		2.30044			5.2445e-05	2.07375e-05	0.0125276	1.4243e-05	2.20589e-06	0.220798	6.54951e-07	0.158407	1.89953					0.7078	0.000108465	153.242	168.988	59				0.707815	0.000130202
																																						Average	0.707797							Average	0.707706
																																						2 s.d.	0.00011793							2 s.d.	0.000173114
																																						2 s.d. ppm	166.616							2 s.d. ppm	244.613
01	Sly01-Seq1-13um				0.000454421	0.000111562	1.22011e-05	0.000141035	0.00221686	0.00013945	-3.27386e-06	0.000119348	-0.000102288	0.000138299	0.000711109	0.0001154	1.75184e-05	0.000117104	1.22111e-05	0.000127132	0.000109574	9.6293e-05		0.57541			1.99257e-05	6.37551e-06	0.00315205	1.69135e-05	1.73811e-05	0.0552222	-4.46076e-06	0.0396092	0.475062					0.707804	0.000241429	341.095	175.59	57				0.707698	0.000391316
02	Sly02-Seq1-13um				0.000457269	0.000134535	1.33076e-05	0.000130126	0.00221908	0.000141884	-5.69612e-07	0.000110435	-9.83126e-05	0.000132794	0.000712844	0.000117952	1.05422e-05	0.00013399	1.18413e-05	0.000138952	0.000114797	0.000127169		0.595443			2.35905e-05	-7.70079e-06	0.00326327	1.28019e-05	-3.53284e-06	0.0571453	-4.3274e-06	0.0410099	0.491599					0.70799	0.000255862	361.392	438.648	56				0.708005	0.000370213
03	Sly03-Seq1-13um				0.000460309	0.000127581	6.60847e-06	0.00012141	0.00225111	0.000141696	4.73338e-06	0.000120701	-0.000100982	0.00012702	0.000728942	9.99043e-05	-4.51098e-06	8.95538e-05	2.15566e-05	0.000106191	0.000113423	0.000112595		0.573955			1.84959e-05	7.25186e-06	0.00312769	4.06187e-06	7.29481e-06	0.0550807	1.36303e-05	0.0395017	0.473861					0.707625	0.000251204	354.996	-77.2507	56				0.707101	0.000357157
04	Sly01-Seq2-13um				0.000465541	0.000107108	1.53005e-05	0.000121552	0.002253	0.00011463	-1.25946e-06	8.82497e-05	-8.47872e-05	0.000143793	0.000721486	0.000113148	6.07095e-06	0.000145861	1.06455e-05	0.000120708	0.000125416	0.000102462		0.595325			4.0577e-06	-5.23299e-06	0.00324462	1.87661e-05	-9.76411e-06	0.0571309	1.01996e-05	0.0409905	0.491494					0.707878	0.00026091	368.58	280.345	57				0.707439	0.000339184
05	Sly02-Seq2-13um				0.000463252	0.000138373	8.55087e-06	0.000116458	0.00225341	0.000109401	8.22256e-06	9.51601e-05	-8.57588e-05	0.000144621	0.000720186	0.000145456	3.07474e-06	0.000113596	1.60497e-05	0.000148944	0.000126644	0.000111487		0.57718			1.04018e-05	2.95477e-06	0.00314764	3.66225e-06	4.3676e-07	0.0553995	5.30913e-06	0.0397424	0.476506					0.707749	0.000238586	337.105	97.1202	58				0.707581	0.000404529
06	Sly03-Seq2-13um				0.000461594	0.000135054	4.93072e-06	0.000118214	0.00227088	0.000143846	8.65187e-06	0.000107018	-9.42397e-05	0.000124274	0.000728551	0.000107556	8.94214e-06	0.000121169	1.75202e-05	0.00012602	0.000127748	0.000139662		0.578578			1.98331e-05	8.99069e-06	0.00314969	4.829e-06	5.27956e-06	0.0555221	-4.10969e-06	0.0398235	0.477662					0.707659	0.000270199	381.82	-29.2739	57				0.707706	0.000502648
07	Sly01-Seq3-13um				0.000459937	0.00011824	1.17815e-05	0.000124868	0.00224362	0.000145114	-5.00121e-07	0.00012158	-0.000102937	0.000115195	0.000721844	0.000109222	4.81946e-06	0.000106173	1.06957e-05	0.000117495	0.000128635	0.000129424		0.600444			1.66597e-05	4.0477e-06	0.00326821	3.43222e-06	4.84906e-06	0.0576189	7.03855e-06	0.0413425	0.495723					0.707899	0.000246579	348.325	309.021	58				0.707617	0.000381336
08	Sly02-Seq3-13um				0.000467172	0.000102491	1.13621e-05	0.00012729	0.00223318	0.000135112	8.13696e-06	0.000118231	-9.55309e-05	0.000146133	0.00071513	0.000117373	-5.29757e-06	9.39407e-05	2.05449e-05	0.000136251	0.000121671	0.000123929		0.58823			1.10604e-05	-8.2803e-06	0.00321065	-9.55251e-07	-3.47994e-06	0.0564537	1.84002e-05	0.0404938	0.485636					0.707719	0.000174384	246.403	54.5399	57				0.707124	0.000335158
09	Sly03-Seq3-13um				0.000461771	0.000119289	1.50358e-05	0.000123888	0.00223464	0.000127439	8.37573e-06	0.000102369	-0.000101047	0.000130913	0.000718782	9.65871e-05	1.14561e-05	0.000134416	1.19e-05	0.00010122	0.000134545	0.000125651		0.585594			1.31615e-05	9.69018e-06	0.00318303	1.0921e-06	1.73627e-05	0.0562129	-3.10611e-06	0.0403306	0.483446					0.707993	0.000355314	501.86	442.632	57				0.708071	0.000381099
10	Sly01-Seq1-13um				0.000429856	0.000127225	7.70566e-06	0.000106687	0.00210238	0.00013606	4.98562e-06	0.000128759	-9.95085e-05	0.000135378	0.000670809	0.000124985	1.03125e-05	0.000106594	1.25791e-05	0.00011667	5.70795e-05	0.000126725		0.545806			1.81019e-05	1.33581e-05	0.00297614	5.38106e-06	1.2079e-05	0.052373	-9.01366e-06	0.0375597	0.450671					0.707387	0.000214729	303.553	-414.45	58				0.70762	0.000353353
11	Sly02-Seq1-13um				0.000434308	0.000116901	8.96813e-06	0.00012417	0.00210079	0.000127233	-7.72563e-06	0.000116274	-9.44098e-05	0.000122934	0.00067022	0.000111559	3.43304e-06	0.000125756	1.33948e-05	0.000111034	5.84912e-05	0.000122961		0.527216			8.83581e-06	2.76222e-06	0.00287405	1.17708e-05	-8.10033e-07	0.0505742	-4.542e-06	0.0362909	0.435317					0.707694	0.000217584	307.454	20.2767	56				0.707793	0.000434314
12	Sly03-Seq1-13um				0.000425394	0.000113386	9.49363e-06	0.000121914	0.00211288	0.000143484	2.19787e-06	0.000102609	-9.75825e-05	0.000111431	0.000670425	0.000112886	-1.77682e-06	0.000121859	8.19327e-06	0.00011693	6.58883e-05	0.000133807		0.518965			1.54218e-05	3.0486e-06	0.00281821	-1.50492e-07	1.15903e-07	0.0497832	1.07674e-06	0.035729	0.428495					0.707897	0.000224379	316.965	306.818	59				0.707817	0.000336542
13	Sly01-Seq2-13um				0.000430073	0.00011119	1.09166e-05	0.000126854	0.00210062	0.000147236	-9.77374e-07	0.000115153	-9.49272e-05	0.000123851	0.000671905	0.000105908	1.73345e-06	0.00011761	1.48511e-05	0.000129472	6.79177e-05	0.000117106		0.528314			2.15274e-05	-2.68129e-06	0.00287886	1.13926e-05	-2.47818e-06	0.0506876	2.74363e-06	0.0363742	0.436212					0.707908	0.000211632	298.954	322.513	57				0.707586	0.000364476
14	Sly02-Seq2-13um				0.000429832	0.000121774	6.60821e-06	0.000122106	0.00209792	0.000126649	-8.66705e-08	0.000112011	-9.6362e-05	0.000117054	0.00066896	0.000111824	3.35485e-07	0.000106163	7.98812e-06	0.000119059	6.60134e-05	0.000120411		0.537373			1.35325e-05	2.82734e-06	0.00292835	5.64362e-06	2.28743e-06	0.0515741	6.72531e-06	0.037008	0.443695					0.707855	0.000291342	411.584	247.058	59				0.707566	0.000462814
15	Sly03-Seq2-13um				0.000428357	0.000125081	6.90361e-06	0.000115459	0.00210051	0.000142688	-5.89904e-06	0.000117377	-9.43063e-05	0.00010776	0.000670101	0.000115894	1.44666e-06	0.000122735	1.4408e-05	0.000119087	7.3143e-05	0.000113624		0.555628			2.12256e-05	8.52174e-06	0.00302414	1.486e-05	7.10132e-06	0.0533106	-2.67479e-06	0.0382486	0.458765					0.707711	0.000244208	345.067	43.793	57				0.707674	0.000335854
16	Sly01-Seq1-13um				0.000414084	0.000126099	1.45867e-05	0.00012139	0.00201715	0.000154537	-7.39769e-06	0.000110353	-9.31522e-05	0.000114592	0.00063229	0.000114518	7.43965e-06	0.000110209	1.51618e-05	0.000114335	6.15292e-05	0.000102905		0.578234			8.3478e-06	9.29313e-06	0.00314113	3.28789e-06	-3.62815e-06	0.0554796	1.29251e-06	0.039803	0.477442					0.707739	0.000232382	328.344	83.7916	57				0.707473	0.000368511
17	Sly02-Seq1-13um				0.000409538	0.000118519	8.50469e-06	0.000127991	0.00201142	0.000135312	6.96112e-07	0.000114138	-9.35449e-05	0.000135024	0.000632656	0.000124336	5.89009e-06	0.000114615	1.29246e-05	0.000119878	7.68928e-05	0.000119531		0.600245			1.23458e-05	7.96602e-06	0.00326705	6.52135e-06	7.53108e-06	0.0575847	6.69506e-06	0.0413246	0.495603					0.707879	0.000230132	325.101	280.821	58				0.707548	0.000360768
18	Sly03-Seq1-13um				0.000406914	0.000128816	2.12188e-06	0.000106245	0.00200277	0.000118424	9.99128e-06	0.000128174	-9.35705e-05	0.000138109	0.000632242	0.000134198	2.67551e-06	0.000113016	1.35561e-05	0.000126181	7.54635e-05	0.000125564		0.549855			2.12825e-05	5.35535e-06	0.00299764	1.1151e-06	1.01374e-05	0.0527587	4.38322e-06	0.0378559	0.453994					0.707722	0.000260999	368.788	59.1359	57				0.707788	0.000337123
19	Sly01-Seq2-13um				0.000413737	0.000119491	1.60275e-05	0.000122897	0.00201342	0.000148318	7.15841e-06	0.000103605	-9.37237e-05	0.000131451	0.000631156	0.000106267	5.96404e-06	0.00011619	1.0146e-05	0.000130951	7.70857e-05	0.000118112		0.53481			1.21469e-05	5.60531e-07	0.00291113	5.54298e-07	-1.352e-05	0.0513173	1.51902e-06	0.0368257	0.44157					0.707794	0.000246572	348.368	160.83	57				0.707601	0.000355757
20	Sly02-Seq2-13um				0.000414295	0.000107439	1.74306e-05	0.000129097	0.00200419	0.000137571	8.79703e-06	0.000134744	-0.000107077	0.000123576	0.00062779	0.000119689	1.4007e-05	0.000127745	9.69399e-06	0.000116559	8.22759e-05	0.000128087		0.515817			1.07471e-05	-5.64707e-06	0.00280998	1.3896e-06	1.55356e-05	0.0495033	-1.74263e-08	0.0355123	0.425877					0.707646	0.000221426	312.905	-48.6291	58				0.707704	0.000447547
21	Sly03-Seq2-13um				0.000411879	0.000130954	1.07604e-05	0.000126593	0.00199741	0.000146617	6.12161e-06	0.000120003	-0.00010183	0.000129502	0.000630562	0.000108039	1.0879e-05	0.000114366	1.36881e-05	0.000115754	7.79874e-05	0.000121278		0.524534			-8.28875e-07	4.489e-06	0.00284448	9.26648e-06	7.14555e-06	0.0503205	-2.85665e-07	0.0361097	0.433082					0.707878	0.000227046	320.741	280.493	56				0.707703	0.000393481
																																						Average	0.707782							Average	0.707629
																																						2 s.d.	0.000283738							2 s.d.	0.000459991
																																						2 s.d. ppm	400.883							2 s.d. ppm	650.046
01	Sly01-Seq3-10um				0.000414701	0.000117721	4.61595e-06	0.000133481	0.00198843	0.000148125	5.1359e-07	0.000115292	-9.07673e-05	0.000137414	0.000627984	0.000120244	2.0565e-06	0.000116242	1.01695e-05	0.000116929	5.95889e-05	0.000121739		0.274558			-2.50401e-06	3.53309e-06	0.00147737	7.98572e-06	-3.90753e-07	0.0263419	-2.40129e-06	0.0189059	0.22667					0.708037	0.000511921	723.014	504.976	56				0.707814	0.000951376
02	Sly02-Seq3-10um				0.000408165	0.000136028	9.17586e-06	0.000120435	0.00197336	0.00014821	3.88905e-06	0.00013179	-8.99737e-05	0.000119284	0.000627017	0.00011055	2.59262e-06	0.000106096	8.87228e-06	0.000116314	6.68506e-05	0.00012043		0.278379			6.66056e-06	-4.38029e-07	0.00151929	6.991e-06	-5.04266e-06	0.0267079	-3.21062e-06	0.0191706	0.229821					0.708154	0.000522205	737.417	669.526	57				0.70803	0.00086953
03	Sly03-Seq3-10um				0.000406899	0.000121098	1.30846e-05	0.000124217	0.00198	0.000131635	8.04687e-06	0.000121834	-8.96539e-05	0.000111481	0.000620744	0.000120367	6.92718e-06	0.00011981	8.75586e-06	0.000114209	7.09197e-05	0.000129752		0.279032			4.28838e-06	7.15546e-06	0.00152756	-2.39265e-06	-1.63122e-06	0.0267863	5.33887e-06	0.0192056	0.230353					0.707665	0.000458399	647.763	-21.0348	57				0.706567	0.000806484
04	Sly01-Seq4-10um				0.000404361	0.000118045	5.26814e-06	0.000115812	0.00197407	0.000144596	1.42228e-06	0.000121486	-9.65199e-05	0.000131893	0.000620229	0.000112667	8.62848e-06	0.000110189	7.04453e-06	0.000125713	7.44479e-05	0.000107297		0.284336			7.37574e-06	3.07947e-06	0.00154426	4.91948e-06	5.33363e-06	0.0272784	3.47945e-06	0.0195844	0.234732					0.708075	0.000397378	561.208	558.607	57				0.707308	0.000823559
05	Sly02-Seq4-10um				0.000408094	0.000114109	1.27315e-05	0.000121754	0.00197484	0.000138178	8.71266e-06	0.000112632	-9.43756e-05	0.000113976	0.00062342	0.000121779	1.64648e-06	0.000120611	1.56542e-05	0.000122977	6.83456e-05	0.000119488		0.274938			1.36269e-05	1.26114e-06	0.00149839	1.88062e-07	-6.40369e-06	0.0263811	6.94982e-06	0.0189193	0.226974					0.707392	0.000471803	666.961	-406.461	56				0.706307	0.000702447
06	Sly03-Seq4-10um				0.000405218	0.000135756	8.47976e-06	0.000117729	0.00197832	0.000122146	-1.71935e-06	0.00010426	-9.3004e-05	0.000121734	0.000625851	0.000121041	1.54998e-06	0.000128246	8.88411e-06	0.000115606	6.73851e-05	0.000119707		0.277528			1.4405e-05	2.90396e-06	0.00151043	-5.80964e-07	-1.61685e-08	0.0266252	4.81675e-06	0.0190991	0.229116					0.707785	0.000495498	700.068	148.583	58				0.707066	0.000831022
07	Sly01-Seq6-10um				0.000411964	0.000132786	7.56139e-06	0.000119457	0.0020001	0.000132791	-6.4944e-06	0.000120108	-9.42752e-05	0.000119692	0.000627704	0.000121973	-4.64513e-06	0.00013126	1.08442e-05	0.000112928	8.55907e-05	0.000116643		0.281288			1.1267e-05	4.50248e-06	0.00152354	1.33748e-05	-6.6549e-08	0.026999	-9.5835e-07	0.0193663	0.232205					0.707798	0.000442887	625.726	166.623	56				0.707386	0.000655038
08	Sly02-Seq6-10um				0.000414629	0.00011319	5.49683e-06	0.000114845	0.0019846	0.000119748	-1.43737e-06	0.000111511	-9.35349e-05	0.000132013	0.000624059	0.000103534	1.71352e-06	0.000105539	8.77594e-06	9.6131e-05	8.51401e-05	0.000107913		0.2854			1.24399e-05	6.07674e-06	0.00154958	2.16365e-05	5.19433e-06	0.0274059	4.03044e-06	0.0196583	0.235596					0.70778	0.000390214	551.32	141.55	56				0.707249	0.00068441
09	Sly03-Seq6-10um				0.000413234	0.000127975	1.321e-05	0.000110447	0.00198761	0.000141468	-2.85875e-06	0.000107386	-9.51058e-05	0.000135599	0.00062458	0.000110006	-1.21807e-06	0.000109776	7.51149e-06	0.000110421	8.19415e-05	0.000108753		0.272495			1.34063e-05	-5.63554e-06	0.00149076	6.55649e-06	-2.78923e-06	0.0261488	-2.73876e-07	0.0187642	0.224948					0.708049	0.000520073	734.515	521.815	57				0.707778	0.000930175
10	Sly01-Seq1-10um				0.000422794	0.000108367	1.20963e-05	0.000140837	0.00205852	0.000127641	1.39732e-05	0.000127318	-9.42259e-05	0.000121905	0.000650887	9.74738e-05	8.0407e-06	9.70553e-05	2.19525e-05	0.000120591	6.00629e-05	0.000132522		0.25423			6.96363e-06	-3.43324e-06	0.0013686	5.16787e-06	8.68054e-08	0.0243686	-2.74832e-06	0.0174859	0.209884					0.707699	0.000442551	625.338	26.1587	56				0.707651	0.000853341
11	Sly02-Seq1-10um				0.00041858	0.000114794	1.31233e-05	0.000122722	0.0020465	0.000134497	1.63445e-05	0.000115205	-0.000102731	0.000140674	0.00064405	0.000113037	1.30215e-06	0.00011621	1.77118e-05	0.000127475	6.13611e-05	0.000127972		0.260509			1.43251e-05	3.74449e-06	0.00140899	2.60885e-06	1.24192e-05	0.0249807	4.03469e-06	0.0179265	0.215068					0.707934	0.000482159	681.079	358.662	56				0.707278	0.00075102
12	Sly03-Seq1-10um				0.000418174	0.000126754	1.00951e-05	0.000120062	0.00204181	0.000147493	1.32988e-05	0.000118286	-8.35074e-05	0.000138315	0.000642562	0.000111121	3.73556e-07	0.000116301	1.48254e-05	0.000126505	5.73655e-05	0.000123856		0.243311			1.24097e-05	3.66504e-07	0.00131172	5.78508e-06	-1.45633e-05	0.0233388	1.608e-07	0.0167559	0.200869					0.708245	0.000585617	826.857	797.968	56				0.70784	0.00107088
13	Sly01-Seq2-10um				0.000411818	0.000120703	8.89519e-06	0.000113651	0.0020397	0.000148098	1.43227e-05	9.30584e-05	-8.80842e-05	0.000129916	0.00064664	0.0001111	1.5062e-06	0.000115787	2.23236e-05	0.000136011	6.38047e-05	0.000114384		0.247302			1.34462e-05	4.1418e-06	0.00134692	1.48278e-06	4.6117e-06	0.0237064	9.98385e-06	0.0170175	0.204154					0.707816	0.000529573	748.178	192.65	58				0.707029	0.00089776
14	Sly02-Seq2-10um				0.000417444	0.00012754	7.7272e-06	0.000118439	0.00204162	0.000146154	9.63937e-06	0.000116334	-8.56443e-05	0.000132302	0.00064478	0.000103948	6.16397e-06	0.000113871	1.2799e-05	0.00010994	5.93314e-05	0.000117237		0.256234			1.58078e-05	-2.92677e-06	0.00139136	3.05144e-06	2.60685e-06	0.0245812	-1.37883e-06	0.0176365	0.211538					0.707807	0.000476914	673.791	180.157	58				0.708011	0.00111474
15	Sly03-Seq2-10um				0.000421073	0.000123272	5.73603e-06	0.000107908	0.00203474	0.000128953	9.75589e-06	0.000113709	-9.07256e-05	0.000122974	0.000639487	9.62847e-05	1.04856e-05	0.000114702	2.42609e-05	0.000126748	6.41514e-05	0.000125112		0.248738			8.3395e-06	1.31525e-05	0.00135055	8.54674e-06	3.712e-06	0.0238669	-5.28232e-06	0.0171209	0.205341					0.707551	0.000504283	712.716	-182.588	56				0.708078	0.00105529
16	Sly01-Seq3-10um				0.000419576	0.000106474	8.07827e-06	0.000122849	0.00203956	0.000150135	4.71746e-06	0.00010994	-8.71471e-05	0.000133925	0.000648077	0.000121843	1.41551e-06	0.000115678	1.51349e-05	0.000108612	6.35256e-05	0.000110011		0.250732			3.33411e-06	9.11534e-06	0.00137258	1.56973e-05	-8.53323e-09	0.0240415	5.17271e-06	0.0172643	0.206994					0.708235	0.000517715	730.994	783.959	55				0.707369	0.00106564
17	Sly02-Seq3-10um				0.000416863	0.000114537	6.70197e-06	0.00012096	0.00203851	0.000150922	3.71364e-06	0.000125845	-8.79024e-05	0.000134698	0.000637642	0.000104307	6.00505e-09	0.000126817	1.72609e-05	0.000120509	6.3325e-05	0.000121702		0.255227			1.67852e-05	1.013e-05	0.00139198	9.03437e-06	3.30829e-08	0.0244736	2.83912e-06	0.0175588	0.210702					0.707478	0.000591867	836.587	-285.095	56				0.707345	0.000835215
18	Sly03-Seq3-10um				0.000418828	0.000117519	1.06663e-05	0.000126159	0.00204792	0.000138918	3.21043e-06	0.000119964	-8.88762e-05	0.000119159	0.000642577	0.000117193	4.74057e-06	0.000119045	1.18254e-05	0.000112725	6.30432e-05	0.000133301		0.269423			8.87248e-06	5.40781e-06	0.00145524	8.78479e-06	1.06386e-06	0.0258432	5.5984e-06	0.0185525	0.222424					0.708013	0.000453129	640	470.866	57				0.707105	0.000889826
19	Sly01-Seq4-10um				0.000417472	0.000123949	7.41484e-06	0.000116554	0.00204039	0.000143072	3.94605e-06	0.000121061	-9.72059e-05	0.00011989	0.00065399	0.000114486	1.00804e-05	0.000109861	1.74701e-05	0.000122579	6.30606e-05	0.00011328		0.270201			1.19552e-05	6.29345e-06	0.00146547	1.34805e-05	7.06758e-06	0.0259068	-8.23738e-06	0.0186037	0.22307					0.708153	0.000358685	506.508	667.936	56				0.708524	0.000829151
20	Sly02-Seq4-10um				0.000420793	0.000126744	9.08866e-06	0.000122191	0.00204589	0.000143807	-1.34814e-06	0.000116152	-8.90648e-05	0.000120126	0.000651713	0.000114495	3.39095e-06	0.000111414	1.52377e-05	0.000123397	6.67155e-05	0.000121202		0.255483			8.9831e-06	5.74237e-06	0.00138976	-2.56022e-06	-3.76817e-08	0.0245014	6.96412e-06	0.0175826	0.21091					0.708001	0.000466477	658.864	454.271	56				0.707053	0.00091197
21	Sly03-Seq4-10um				0.000419427	0.000117717	1.13039e-05	0.000127574	0.00204321	0.000157193	-1.64344e-06	0.000117575	-8.93798e-05	0.000116867	0.00064916	0.000121139	4.05455e-06	0.000124405	1.77452e-05	0.00011621	7.05231e-05	0.000117364		0.268188			3.71496e-06	9.91049e-06	0.00145654	1.11532e-05	4.20662e-07	0.025704	-1.54673e-06	0.0184543	0.221398					0.708079	0.000355188	501.622	563.171	54				0.707422	0.00089375
																																						Average	0.707893							Average	0.707439
																																						2 s.d.	0.00048845							2 s.d.	0.00104203
																																						2 s.d. ppm	690.006							2 s.d. ppm	1472.97
01	Sume01-Seq7-50um				0.000417051	0.000171777	1.46556e-05	0.000157543	0.00200782	0.000232428	-2.0468e-05	0.000115961	-0.000110296	0.000182186	0.00067106	0.000112603	-7.0245e-06	0.000121415	3.10018e-05	0.000167808	0.000347237	0.000191992		5.61449			0.00074365	0.000426965	0.0317247	0.00029974	0.000121578	0.539443	0.000123795	0.386787	4.6361					0.70775	5.71068e-05	80.6878	711.751	60				0.707326	6.36662e-05
02	Sume02-Seq7-50um				0.000410521	0.00017698	5.705e-06	0.00015813	0.00200214	0.000224566	2.34644e-06	0.000146336	-0.000109813	0.000190389	0.000677828	0.000176266	1.2291e-06	0.000175612	5.09046e-05	0.000152615	0.000452197	0.000177779		5.60692			0.00071409	0.000414864	0.0316683	0.000252934	0.000118609	0.538791	0.000115463	0.386252	4.62974					0.707691	5.20206e-05	73.5075	628.406	57				0.707301	6.56658e-05
03	Sume03-Seq7-50um				0.000419281	0.000188924	8.77828e-07	0.000192595	0.00199802	0.000206915	-6.70473e-06	0.000169355	-0.000106225	0.000174684	0.000695255	0.000146973	1.44449e-06	0.000178796	5.59877e-05	0.000137124	0.000499016	0.000175768		5.57317			0.000678726	0.000401323	0.0314413	0.000245802	0.000110541	0.535497	0.000104294	0.3839	4.60182					0.707667	6.54936e-05	92.5486	594.33	58				0.707333	7.2971e-05
04	Sume01-Seq8-50um				0.000412212	0.000171332	3.14136e-06	0.000161837	0.00200037	0.000179656	-1.3349e-05	0.000154758	-9.37837e-05	0.000147144	0.000710707	0.000118491	2.06639e-06	0.000124328	6.61678e-05	0.000129669	0.000580736	0.000175421		6.08019			0.000701065	0.000399391	0.0342442	0.000265068	9.80645e-05	0.583982	0.000104518	0.418664	5.02044					0.707528	6.27775e-05	88.7279	397.541	59				0.707219	6.91188e-05
05	Sume03-Seq8-50um				0.000408179	0.000162477	1.12452e-05	0.000215048	0.00200666	0.000179473	4.34146e-07	0.000170875	-0.000108125	0.000134186	0.000704493	0.000150517	5.61002e-06	0.000173348	6.10463e-05	0.000188617	0.000615213	0.000164938		5.50087			0.00057225	0.000322729	0.0309287	0.000219895	0.000104371	0.528539	8.08861e-05	0.378943	4.54201					0.707735	8.11711e-05	114.691	690.361	59				0.70744	8.82636e-05
06	Sume02-Seq8-50um				0.000405512	0.000205234	7.63102e-06	0.000176086	0.00200267	0.000132999	8.80255e-06	0.000137802	-0.000108594	0.000190437	0.000696635	0.000151954	-7.24092e-08	0.000138021	6.61129e-05	0.000110206	0.000602923	0.000158915		6.48046			0.000709005	0.000396831	0.0364333	0.000257456	0.000111713	0.622367	0.000102709	0.44623	5.35096					0.707578	6.31697e-05	89.2759	468.18	58				0.707273	7.04505e-05
07	Sume01-Seq9-50um				0.00040802	0.00015228	7.7308e-06	0.000142063	0.00200964	0.000218366	6.16611e-06	0.000167107	-9.27295e-05	0.000182466	0.000700417	0.000145759	-5.63119e-06	0.000143412	5.81001e-05	0.000156999	0.00067173	0.000144392		5.5985			0.000673492	0.000381227	0.031538	0.000317221	9.65681e-05	0.537889	0.000103849	0.385632	4.62257					0.707645	7.42746e-05	104.96	562.423	59				0.707289	6.77777e-05
08	Sume02-Seq9-50um				0.000401709	0.000202673	4.10163e-06	0.000132719	0.0019919	0.000168198	-2.33585e-06	0.000173376	-0.000108856	0.000141267	0.000703609	0.000150994	5.17736e-06	0.000177938	6.91994e-05	0.000169048	0.000670033	0.000192883		5.75231			0.000602818	0.00034656	0.0323199	0.0002211	8.81282e-05	0.552423	8.55716e-05	0.396055	4.74959					0.707549	6.92277e-05	97.8415	427.258	57				0.707289	8.29867e-05
09	Sume03-Seq9-50um				0.000406077	0.000150064	8.03488e-06	0.000134035	0.00199214	0.000152002	3.83236e-07	0.000133961	-0.000110938	0.000151624	0.000695548	0.00017021	3.01069e-06	0.000175355	6.72596e-05	0.00015361	0.000669421	0.000168534		5.76086			0.000597225	0.000331937	0.0323652	0.000217797	9.00159e-05	0.553411	8.19807e-05	0.396715	4.75665					0.707541	7.60422e-05	107.474	416.152	59				0.707285	8.44221e-05
10	Sume01-Seq1-50um				0.000434073	0.000169547	1.98999e-05	0.000168568	0.0020731	0.000192983	-6.76748e-06	0.000138662	-9.90794e-05	0.000145049	0.000714364	0.000148109	2.5688e-06	0.000153249	5.58272e-05	0.000140711	0.000592238	0.000151753		5.25092			0.000644678	0.000364821	0.0295589	0.000244706	0.000107828	0.504255	9.36199e-05	0.361582	4.33562					0.707594	6.23492e-05	88.1144	490.374	56				0.707269	6.84445e-05
11	Sume02-Seq1-50um				0.000434679	0.000180301	4.65698e-06	0.000161642	0.00208132	0.000199779	-7.59499e-06	0.000157372	-8.84529e-05	0.000135557	0.000723176	0.000156674	-6.69978e-07	0.000191352	6.45786e-05	0.000128574	0.00061726	0.000195459		5.52827			0.000714432	0.000436667	0.0311364	0.000282308	0.00010769	0.530845	0.000112316	0.38066	4.56463					0.707618	6.77713e-05	95.7739	524.821	59				0.707238	7.03485e-05
12	Sume03-Seq1-50um				0.00042712	0.000183388	5.53092e-06	0.000152475	0.00208983	0.000210992	-9.48289e-07	0.000149382	-9.36655e-05	0.000179809	0.000727814	0.000115132	1.03028e-06	0.000168703	6.35528e-05	0.000156703	0.00063221	0.000202674		5.21933			0.000690618	0.000404863	0.0294112	0.00026574	0.000112994	0.501194	0.000109775	0.359366	4.30949					0.707574	5.44882e-05	77.007	461.887	57				0.707182	6.51715e-05
13	Sume01-Seq2-50um				0.00043533	0.000149296	1.61393e-05	0.000167887	0.00207051	0.000194559	2.41199e-07	0.000186286	-0.000106812	0.000151194	0.000729804	0.000107894	3.72764e-06	0.000174322	6.46716e-05	0.000139194	0.000617594	0.000164338		5.3419			0.00062353	0.00035816	0.0300295	0.000221474	9.61995e-05	0.512924	8.89317e-05	0.367774	4.41073					0.707535	7.71408e-05	109.028	406.512	59				0.707239	8.37033e-05
14	Sume02-Seq2-50um				0.000428613	0.000142327	1.30391e-05	0.000142895	0.0020771	0.000168668	-4.04429e-06	0.000166242	-0.000109493	0.000174197	0.000734624	0.00017655	3.95796e-06	0.000124133	6.62947e-05	0.000152949	0.00065797	0.00021036		5.45669			0.00072035	0.000417152	0.0307395	0.000263496	0.000126414	0.523921	0.000107989	0.37566	4.50548					0.707511	6.46679e-05	91.402	373.063	58				0.707147	6.69562e-05
15	Sume03-Seq2-50um				0.000435438	0.000132302	1.38407e-05	0.000132205	0.00208223	0.000166635	7.18035e-07	0.000211478	-9.07415e-05	0.000155438	0.000740534	0.000154787	-5.25249e-06	0.000177851	6.67855e-05	0.000155599	0.000660339	0.000195047		5.73417			0.000820091	0.000484223	0.0323733	0.00030248	0.000125859	0.550576	0.000141855	0.39484	4.73462					0.707671	5.83212e-05	82.4129	599.496	59				0.707218	6.48376e-05
16	Sume01-Seq1-50um				0.000409238	0.000163615	9.14106e-06	0.000166427	0.00197703	0.000188044	-7.04977e-06	0.000157867	-7.92356e-05	0.000175273	0.000639242	0.000148073	3.97249e-06	0.000201735	2.29565e-05	0.000158499	0.000193516	0.000156591		5.3298			0.000792031	0.000486154	0.0301209	0.000318399	0.000132273	0.511493	0.000111922	0.366936	4.40116					0.707659	5.18244e-05	73.2336	582.488	57				0.707287	6.03481e-05
17	Sume03-Seq1-50um				0.000410881	0.000156664	2.53726e-05	0.000139716	0.0019693	0.000203195	4.95366e-06	0.000144226	-7.56251e-05	0.000201506	0.00063719	0.000152296	2.69688e-06	0.000163625	2.05508e-05	0.000154151	0.000189691	0.000156797		5.36813			0.00073431	0.000429936	0.0302544	0.000288486	0.000111691	0.515274	0.000111194	0.369592	4.43281					0.707665	8.08593e-05	114.262	590.738	59				0.707282	8.91964e-05
18	Sume01-Seq2-50um				0.000408232	0.00016314	1.67859e-05	0.000165031	0.00196679	0.000205531	2.82593e-06	0.000144549	-8.14814e-05	0.000149986	0.000644639	0.000145958	9.91871e-06	0.000137074	3.13238e-05	0.00014455	0.000260179	0.000193642		5.2689			0.000812695	0.00048651	0.0298112	0.00032757	0.000137669	0.505743	0.000118335	0.362829	4.35079					0.707783	7.11117e-05	100.471	758.277	58				0.707342	7.28819e-05
19	Sume02-Seq2-50um				0.000404039	0.000157956	1.46797e-05	0.000157379	0.00197653	0.000169935	7.203e-06	0.000145034	-8.47691e-05	0.000139129	0.000654375	0.000136742	9.25159e-06	0.000149588	3.86341e-05	0.000162899	0.00033755	0.000222		5.23486			0.000633274	0.000371933	0.0294543	0.000243588	0.00011015	0.502379	9.3042e-05	0.360306	4.32261					0.707517	6.46597e-05	91.3897	381.178	58				0.707147	7.17561e-05
20	Sume03-Seq2-50um				0.000402662	0.000194782	1.64933e-05	0.000169749	0.00196776	0.000173641	-1.13333e-06	0.000152209	-8.28803e-05	0.000179702	0.000660414	0.000144191	7.51089e-06	0.000145151	3.89904e-05	0.000166188	0.000371829	0.000189229		5.2528			0.000794835	0.000470539	0.0296645	0.000322788	0.000131647	0.504178	0.000120654	0.361649	4.33739					0.70766	6.84985e-05	96.7958	584.089	58				0.707209	7.41747e-05
																																						Average	0.707624							Average	0.707266
																																						2 s.d.	0.000163211							2 s.d.	0.000139323
																																						2 s.d. ppm	230.646							2 s.d. ppm	196.988
01	Sume01-Seq4-25um				0.000510417	0.000152141	8.33105e-06	0.000115112	0.00250147	0.000179274	2.76801e-06	9.85333e-05	-9.74013e-05	0.00017434	0.000795363	0.000131287	-1.96054e-06	0.000118894	2.97241e-05	0.000129006	0.000142497	0.000176316		1.53679			0.000162814	0.000123841	0.00842923	7.95326e-05	4.11272e-05	0.147498	3.14594e-05	0.105824	1.26894					0.707796	8.65968e-05	122.347	775.723	57				0.707376	0.000140269
02	Sume02-Seq4-25um				0.000432855	0.000157729	5.86405e-06	0.000152844	0.00212725	0.000232071	1.92909e-06	0.000117468	-8.94469e-05	0.000134281	0.000681168	0.000167399	-3.20079e-06	0.000165577	1.51881e-05	0.000170313	0.000165346	0.000160313		1.55614			0.000209847	0.000119126	0.00878752	8.02363e-05	2.68379e-05	0.149419	3.32044e-05	0.107155	1.28489					0.707714	0.000125116	176.79	659.967	57				0.707217	0.000145183
03	Sume03-Seq4-25um				0.000431439	0.000174054	-1.08183e-06	0.000101335	0.0021072	0.000209941	-6.47139e-06	0.000211508	-9.74656e-05	0.00013472	0.000683707	0.000164007	-5.78969e-06	0.000141275	2.96466e-05	0.000143749	0.000186302	0.000165448		1.57445			0.000200482	0.000123039	0.00888053	7.647e-05	2.40047e-05	0.151176	2.61561e-05	0.108387	1.29999					0.707521	0.000117926	166.674	387.214	58				0.707176	0.000173115
04	Sume01-Seq5-25um				0.000424686	0.000137634	-3.78028e-06	0.000127766	0.00207165	0.000218812	-4.75327e-06	0.000167043	-0.000109735	0.000182231	0.000677341	0.000197704	1.26115e-05	0.000127964	2.34586e-05	0.000146386	0.000208219	0.000144582		1.62542			0.000236761	0.000152188	0.00920162	9.09008e-05	4.63553e-05	0.156079	1.2402e-05	0.111917	1.34207					0.70761	7.42753e-05	104.966	513.212	56				0.707475	0.000112359
05	Sume02-Seq5-25um				0.000417236	0.000171019	9.58267e-06	0.000172838	0.00206102	0.000196544	-2.7456e-06	0.000136862	-8.91992e-05	0.000162936	0.000678819	0.000101238	-5.13605e-06	0.000128712	2.76071e-05	0.000167261	0.000213359	0.000151266		1.59188			0.000215518	0.000123349	0.0090056	9.11241e-05	2.65861e-05	0.152844	2.95483e-05	0.109616	1.31436					0.707734	0.000109269	154.393	688.421	57				0.707332	0.000156644
06	Sume03-Seq5-25um				0.000420457	0.00016556	3.32151e-06	0.000156697	0.00206647	0.000159914	1.75841e-06	0.000148247	-0.000103592	0.000152841	0.000667646	0.000148927	4.51555e-06	0.00015679	1.75682e-05	0.000130733	0.00020894	0.00014856		1.62018			0.000209792	0.000122543	0.00914488	7.35879e-05	4.70154e-05	0.155584	1.91631e-05	0.111569	1.33774					0.70768	0.00012109	171.109	612.19	58				0.707445	0.000143286
07	Sume01-Seq6-25um				0.000427116	0.000124352	-2.58084e-06	0.000155277	0.0020562	0.000177485	1.60702e-06	0.000137508	-8.87191e-05	0.000143568	0.000666562	0.000140303	-5.54383e-06	0.000132782	2.54581e-05	0.00016917	0.000214978	0.000162372		1.64914			0.000235697	0.000154039	0.00934745	8.89838e-05	2.65227e-05	0.158358	4.25825e-05	0.113547	1.36164					0.70763	9.15728e-05	129.408	541.613	56				0.707159	0.000145799
08	Sume02-Seq6-25um				0.000424588	0.000186113	1.29569e-06	0.000167285	0.0020705	0.000163896	5.33634e-06	0.000120381	-9.3265e-05	0.000179095	0.000666898	0.000127992	-1.08048e-05	0.000130155	3.559e-05	0.00016148	0.00022941	0.000144254		1.57032			0.000208097	0.000128704	0.00886972	7.85332e-05	2.49169e-05	0.150796	4.09226e-05	0.108093	1.29654					0.707405	0.000112033	158.371	223.403	60				0.706896	0.000129426
09	Sume03-Seq6-25um				0.000425677	0.000183635	1.22642e-05	0.000143763	0.00205495	0.000156158	5.17602e-05	0.000130556	-9.75288e-05	0.000173271	0.000676892	0.00013501	-9.20041e-06	0.00016156	2.48258e-05	0.000139906	0.000242838	0.000160359		1.60903			0.000202638	0.000129864	0.00908781	8.16827e-05	2.80549e-05	0.154464	3.30347e-05	0.110772	1.32849					0.707575	0.000102452	144.794	463.977	57				0.707237	0.000157599
10	Sume01-Seq4-25um				0.000434761	0.000170217	9.74367e-06	0.000153819	0.00207406	0.000192835	4.86427e-05	0.000146914	-8.68368e-05	0.000159397	0.000661356	0.000158955	5.67778e-06	0.000166716	1.85013e-05	0.000159168	9.37282e-05	0.00014538		1.504			0.000278641	0.000175185	0.00855452	0.000119759	4.0062e-05	0.144365	3.8031e-05	0.103556	1.24191					0.707663	0.000122394	172.955	588.031	56				0.707171	0.000174451
11	Sume02-Seq4-25um				0.000427462	0.000159591	1.12498e-05	0.000149297	0.00208835	0.000201855	5.4889e-05	0.000154838	-7.75787e-05	0.000178241	0.000656328	0.000141203	1.46429e-06	0.000140393	1.57447e-05	0.000166327	0.000108849	0.000158156		1.48476			0.000247971	0.000146237	0.00840171	9.26798e-05	2.9011e-05	0.142499	3.38059e-05	0.102206	1.226					0.707592	0.00012052	170.324	488.47	58				0.70707	0.000160286
12	Sume03-Seq4-25um				0.000431031	0.000148817	1.06193e-05	0.000149466	0.00208776	0.000191337	2.94112e-05	0.000201961	-9.1192e-05	0.000176454	0.000662303	0.000158236	9.1624e-07	0.000142569	1.19966e-05	0.000134851	0.000119391	0.00018948		1.47955			0.000269403	0.000163711	0.00840825	8.46149e-05	3.47976e-05	0.142007	4.5588e-05	0.101872	1.22169					0.707678	0.000139646	197.33	610.025	56				0.707125	0.000175434
13	Sume01-Seq5-25um				0.000429047	0.000161776	1.49891e-05	0.000181128	0.00208791	0.000208804	-8.63859e-07	0.000141397	-8.23029e-05	0.000146456	0.000665149	0.000149642	2.87233e-06	0.000158709	1.76515e-05	0.0001669	0.000135839	0.000179997		1.40339			0.000228525	0.000138638	0.00794448	9.45979e-05	2.83513e-05	0.134743	2.95887e-05	0.0966214	1.15878					0.707583	9.94863e-05	140.6	474.925	56				0.707201	0.000157894
14	Sume02-Seq5-25um				0.000425169	0.000168027	1.21685e-05	0.000149433	0.00209661	0.000180217	1.1686e-06	0.000149069	-9.28956e-05	0.000168812	0.000670972	0.00014248	-3.25172e-06	0.000132087	1.48157e-05	0.000142053	0.000143302	0.000172557		1.40216			0.000229541	0.000140878	0.00793124	9.29284e-05	3.13014e-05	0.134593	3.8033e-05	0.0965406	1.15776					0.707693	0.000123325	174.264	630.775	58				0.707181	0.000184652
15	Sume03-Seq5-25um				0.000428659	0.000150875	1.16006e-05	0.000175893	0.00209112	0.000160691	3.99326e-06	0.000153532	-9.28198e-05	0.000172339	0.000666545	0.000148595	5.08338e-06	0.000144177	1.21724e-05	0.000144294	0.000141831	0.00015483		1.41624			0.000237122	0.000140862	0.00802129	9.21152e-05	3.22348e-05	0.135952	3.09951e-05	0.0975085	1.16939					0.707672	0.000112084	158.384	601.268	57				0.70718	0.000149134
16	Sume01-Seq4-25um				0.000406841	0.00017619	1.04771e-05	0.000152739	0.00196627	0.000166899	6.5566e-06	0.000162095	-9.5333e-05	0.000174474	0.000627184	0.000154735	-1.96005e-06	0.000160577	1.04323e-05	0.000177259	7.54481e-05	0.000147967		1.39145			0.000209743	0.000128996	0.00786782	7.42882e-05	3.0203e-05	0.13362	2.68097e-05	0.0958131	1.14898					0.707628	0.000134744	190.417	539.174	59				0.707294	0.000180249
17	Sume03-Seq4-25um				0.000412534	0.00016445	1.25931e-05	0.000164744	0.00197017	0.000166084	6.3986e-06	0.000134557	-8.86076e-05	0.000134611	0.000633372	0.000139527	-4.93809e-06	0.000158882	9.30086e-06	0.00015516	9.83008e-05	0.000166862		1.4088			0.000210337	0.000133977	0.00796231	7.2734e-05	2.71173e-05	0.135262	3.81787e-05	0.0970079	1.16329					0.707664	0.000144057	203.567	589.572	58				0.707218	0.00015413
18	Sume03-Seq4-25um				0.000411132	0.000146472	5.60022e-06	0.000158259	0.00196729	0.000173807	7.21265e-06	0.000155736	-8.88117e-05	0.000156735	0.000631514	0.000149653	4.01907e-06	0.000170657	1.21808e-05	0.000152434	0.000116872	0.000157537		1.4263			0.000209561	0.000120383	0.00804659	7.66246e-05	2.82394e-05	0.13696	3.23111e-05	0.0982103	1.17773					0.707528	0.000116997	165.36	397.168	56				0.707109	0.000173557
19	Sume01-Seq5-25um				0.000411122	0.000148865	8.91493e-06	0.000168399	0.00197081	0.00016664	-3.81682e-06	0.000160344	-9.12441e-05	0.000156387	0.000634644	0.000157155	-4.49923e-06	0.000150734	2.14262e-05	0.00016736	0.000130745	0.000188834		1.51313			0.000231321	0.000136888	0.00854725	8.99594e-05	3.49018e-05	0.145212	3.87927e-05	0.104156	1.24941					0.707633	0.000109048	154.103	546.06	58				0.707093	0.000158861
20	Sume02-Seq5-25um				0.000414003	0.000169904	1.50173e-05	0.000159561	0.00196973	0.000179673	-5.48122e-06	0.000135584	-8.65544e-05	0.000143123	0.00063048	0.000144584	-1.08956e-05	0.000128638	1.4596e-05	0.000156837	0.000145334	0.000158798		1.49533			0.000220857	0.000126866	0.00844775	9.11017e-05	3.04276e-05	0.143522	3.70543e-05	0.102924	1.2347					0.707545	0.00012581	177.813	420.955	58				0.706949	0.000175088
21	Sume03-Seq5-25um				0.000415321	0.000154584	6.92314e-06	0.000158314	0.00196545	0.000178712	-2.55168e-06	0.000145605	-8.63008e-05	0.000158997	0.000635291	0.000157657	1.08972e-07	0.000156104	1.36547e-05	0.0001598	0.00014161	0.000180237		1.49994			0.000199035	0.00012598	0.00846037	7.65302e-05	1.72445e-05	0.143937	2.62507e-05	0.103239	1.23851					0.707586	0.000115403	163.094	478.936	57				0.70727	0.000176971
																																						Average	0.707625							Average	0.707199
																																						2 s.d.	0.000171382							2 s.d.	0.000283217
																																						2 s.d. ppm	242.193							2 s.d. ppm	400.477
01	Sume01-Seq1-13um				0.000452058	0.000192949	5.11719e-06	0.000148987	0.00222413	0.000172227	1.17125e-05	0.000150818	-0.000105068	0.000167014	0.000702535	0.000162342	-6.21993e-07	0.000136316	1.52091e-05	0.000146653	0.000124791	0.000166003		0.38601			6.35755e-05	4.01846e-05	0.00217254	1.71309e-05	1.38253e-05	0.0370608	6.63951e-06	0.0265631	0.318642					0.707397	0.000394248	557.322	211.861	55				0.707199	0.000590398
02	Sume02-Seq1-13um				0.000462546	0.000150088	4.67547e-06	8.12113e-05	0.00223231	0.000188732	9.61343e-06	0.000145221	-8.9294e-05	0.000175028	0.000714998	0.000171978	3.23258e-06	0.000188758	1.015e-05	0.000133225	0.000123322	0.000116558		0.372808			4.43291e-05	3.90958e-05	0.00209717	1.1363e-05	4.13352e-06	0.0357658	-1.43914e-06	0.0256508	0.307742					0.707515	0.000307778	435.012	379.421	57				0.707619	0.000485928
03	Sume03-Seq1-13um				0.000450244	0.000125761	3.10552e-06	0.000134717	0.0022152	0.000180698	-1.30692e-06	0.000149732	-8.70616e-05	0.000154863	0.000703267	0.000191139	9.61016e-06	0.000105525	1.10556e-05	0.000149072	0.000125424	0.000153513		0.36766			6.00012e-05	3.42402e-05	0.00206987	2.7538e-05	-3.41948e-07	0.0352793	4.98914e-08	0.0252972	0.303488					0.707395	0.000328459	464.323	209.105	55				0.707179	0.000595884
04	Sume01-Seq2-13um				0.000451585	0.000156585	2.23734e-05	0.000163013	0.00220024	0.000198016	7.18693e-06	0.000164297	-9.24035e-05	0.000163602	0.000693211	0.0001293	-2.46461e-06	0.000170075	1.31403e-05	0.000135446	0.000130015	0.000136645		0.375238			5.31479e-05	1.33582e-05	0.00211527	9.55782e-06	1.0312e-05	0.0359966	7.74769e-06	0.0258228	0.309741					0.707725	0.000311536	440.193	676.283	58				0.707041	0.000497406
05	Sume02-Seq2-13um				0.000452579	0.000174342	7.88464e-06	0.000163232	0.0021692	0.000213057	4.83483e-07	0.000149665	-9.41797e-05	0.000130491	0.000689586	0.000143824	-5.33031e-06	0.000143994	1.30559e-05	0.000147382	0.000126876	0.000165057		0.377525			5.09621e-05	3.07426e-05	0.00214645	2.34621e-05	1.80369e-05	0.0362262	7.85535e-06	0.0259802	0.311633					0.707564	0.000327146	462.355	448.871	59				0.70706	0.000538643
06	Sume03-Seq2-13um				0.000453354	0.000148231	5.42169e-06	0.000187819	0.00216755	0.000182494	-1.65503e-06	0.00015941	-9.81496e-05	0.000146586	0.000689407	0.000145712	-8.92874e-07	0.000113492	1.27037e-05	0.000132496	0.000119779	0.000196969		0.3678			5.49517e-05	3.77367e-05	0.00209091	2.30079e-05	7.43644e-06	0.0353068	7.2132e-06	0.0253124	0.30361					0.707456	0.000358583	506.862	295.646	60				0.706698	0.000607353
07	Sume01-Seq3-13um				0.000449588	0.000124311	3.63838e-06	0.000111018	0.00216721	0.000217681	2.16739e-06	0.000163406	-0.000103425	0.000169702	0.000687878	0.000170491	-3.44545e-06	0.000134268	1.12811e-05	0.000174567	0.000121921	0.000131149		0.372286			4.84676e-05	4.21496e-05	0.00209335	2.61304e-05	1.68583e-06	0.0357158	1.35529e-05	0.0256192	0.307311					0.707688	0.000350031	494.612	622.923	57				0.707102	0.000519375
08	Sume02-Seq3-13um				0.000444286	0.000185208	9.23092e-06	0.000144165	0.00215221	0.000213079	6.28057e-06	9.35901e-05	-0.000113775	0.00013399	0.000689029	0.000189188	3.84523e-06	0.000154414	7.63929e-06	0.000152581	0.000120298	0.000182457		0.378038			5.65805e-05	3.45898e-05	0.00213394	2.57685e-05	1.54227e-05	0.036275	1.52875e-06	0.026021	0.312063					0.707749	0.000329336	465.329	709.097	58				0.707334	0.000645102
09	Sume03-Seq3-13um				0.000450125	0.000195666	1.99752e-05	0.000138146	0.00216916	0.000201287	3.88861e-06	0.000127687	-0.000106827	0.000164771	0.000675923	0.000174349	5.25276e-06	0.000199689	7.5613e-06	0.000136751	0.0001221	0.000155597		0.371784			4.74998e-05	1.5201e-05	0.0020905	1.64885e-05	1.19527e-05	0.0356917	7.958e-06	0.0255848	0.306897					0.707354	0.000356776	504.381	151.643	59				0.70668	0.000624204
10	Sume01-Seq1-13um				0.000426085	0.000162882	1.07726e-05	0.000168941	0.00213295	0.000177592	4.16031e-06	0.000128725	-9.52566e-05	0.000156375	0.000663927	0.000149128	5.56353e-06	0.000150926	8.67149e-06	0.0001495	5.06998e-05	0.000155874		0.360135			6.84514e-05	3.10637e-05	0.00203602	2.45464e-05	1.3108e-05	0.034555	7.63374e-06	0.0247852	0.297349					0.707556	0.000405156	572.613	436.559	57				0.706836	0.00065117
11	Sume02-Seq1-13um				0.000437125	0.00016634	5.27754e-06	0.000161132	0.0021335	0.000183428	-1.10672e-05	0.000150811	-9.73042e-05	0.000142859	0.000675237	0.000151389	5.55346e-06	0.000153493	1.61233e-05	0.000135068	5.92239e-05	0.000136177		0.348646			4.92664e-05	3.27533e-05	0.00198336	3.65391e-05	1.2018e-05	0.0334394	5.16944e-06	0.0239908	0.287853					0.70779	0.000330955	467.588	768.131	57				0.706728	0.000559117
12	Sume03-Seq1-13um				0.000435783	0.000159651	6.76774e-06	0.000165044	0.00214036	0.000182901	-1.63241e-06	0.000135752	-8.93197e-05	0.000180439	0.000672011	0.000143773	1.85818e-06	0.000174374	1.31961e-05	0.000148757	5.82987e-05	0.000155394		0.358733			6.10451e-05	3.97491e-05	0.00201811	1.86111e-05	1.59624e-06	0.0343993	1.08819e-05	0.0246899	0.296184					0.707733	0.000377936	534.01	686.975	57				0.707217	0.000605269
13	Sume01-Seq2-13um				0.000440692	0.000154753	1.53278e-05	0.000141744	0.00213606	0.000173237	-5.57053e-06	0.000142395	-9.10559e-05	0.000162049	0.000664791	0.000155425	6.33462e-06	0.000150159	1.25063e-05	0.000179732	5.94808e-05	0.000160443		0.364882			5.83761e-05	2.84425e-05	0.00206391	2.31447e-05	1.35992e-05	0.0350082	4.26048e-06	0.0251135	0.30126					0.707571	0.000333333	471.095	457.885	58				0.707016	0.000500285
14	Sume02-Seq2-13um				0.000433108	0.00013781	9.88697e-06	0.000161637	0.00213853	0.000165311	-7.57819e-06	0.000148147	-9.02919e-05	0.000189829	0.000671526	0.000165088	-1.44317e-06	0.000132057	2.44456e-06	0.000172652	6.21675e-05	0.000160672		0.3584			5.96118e-05	4.09433e-05	0.00202006	2.96942e-05	8.36879e-06	0.0343758	1.48281e-05	0.0246707	0.295905					0.707894	0.000295181	416.985	914.356	57				0.706815	0.000590321
15	Sume03-Seq2-13um				0.000440157	0.000139797	1.38062e-05	0.000154331	0.00213389	0.000191992	8.66112e-07	0.00014942	-9.07332e-05	0.000186189	0.000665725	0.000176643	1.4079e-07	0.000153532	1.78157e-05	0.000159457	5.68868e-05	0.000160825		0.358575			5.82152e-05	2.78024e-05	0.00202412	2.07067e-05	2.14867e-06	0.0343975	9.6559e-06	0.0246661	0.296054					0.70734	0.00029387	415.458	131.158	58				0.706096	0.000623929
16	Sume01-Seq3-13um				0.000429586	0.000165731	6.6039e-06	0.00015129	0.00212756	0.000183636	4.90182e-06	0.000146374	-9.5094e-05	0.000165347	0.00066392	0.000152997	3.69677e-06	0.000142024	1.20705e-05	0.000120267	6.42627e-05	0.000181957		0.359709			6.7421e-05	5.12866e-05	0.00204337	2.11311e-05	2.07236e-06	0.0345164	5.6187e-06	0.0247491	0.296983					0.707389	0.000344727	487.324	200.102	57				0.706872	0.000644979
17	Sume02-Seq3-13um				0.000434691	0.000153625	1.55122e-06	0.00016508	0.00213362	0.000193172	2.42554e-07	0.000136909	-9.43952e-05	0.000163127	0.000665899	0.000161829	2.4104e-06	0.00013438	1.52115e-05	0.000161317	6.39746e-05	0.000192517		0.358666			5.26171e-05	4.02258e-05	0.00201685	3.36468e-05	1.73992e-05	0.0344045	7.59525e-06	0.0246792	0.296122					0.70756	0.000339208	479.405	441.985	57				0.706945	0.000682655
18	Sume03-Seq3-13um				0.000433841	0.000163508	1.05574e-05	0.000162188	0.00212323	0.000174284	3.05958e-06	0.000168228	-9.83383e-05	0.000150284	0.00066493	0.000169252	1.61014e-06	0.00016366	1.34596e-05	0.000129768	6.3299e-05	0.000143636		0.351226			5.35851e-05	4.52727e-05	0.00198709	2.80936e-05	3.77034e-06	0.0336881	2.34068e-06	0.0241717	0.289979					0.707786	0.000343283	485.011	761.508	57				0.707388	0.000696042
19	Sume01-Seq5-13um				0.000437917	0.000169511	1.12296e-05	0.000171734	0.00205856	0.00019554	5.3327e-06	0.000158194	-0.000100381	0.000165019	0.000653011	0.000159342	2.67498e-06	0.000152094	2.34896e-06	0.000148461	6.77679e-05	0.000172016		0.392756			5.84238e-05	3.8742e-05	0.00219638	2.25528e-05	1.09861e-06	0.0376703	4.50354e-06	0.0270336	0.32427					0.707663	0.000310762	439.138	588.26	55				0.707497	0.000518855
20	Sume02-Seq5-13um				0.000424883	0.00019059	1.31075e-05	0.000132648	0.00203649	0.000174335	-2.11618e-07	0.00015119	-0.000102053	0.00016852	0.000646351	0.000185977	2.98287e-06	0.000174398	1.05479e-05	0.000152461	7.08509e-05	0.000169864		0.394233			5.46711e-05	2.83825e-05	0.0022182	2.48914e-05	4.95712e-06	0.0378175	8.61384e-06	0.0271193	0.325486					0.707302	0.000290954	411.357	77.9484	58				0.706541	0.000481543
21	Sume03-Seq5-13um				0.000425968	0.000156326	1.84076e-05	0.00016282	0.00203619	0.000181663	3.9311e-06	0.000126839	-0.000100084	0.000169907	0.000644284	0.000137254	2.19726e-06	0.000160203	9.72399e-06	0.000155396	7.08978e-05	0.000163245		0.396194			5.43506e-05	2.78794e-05	0.00223329	1.96669e-05	9.7515e-06	0.0380104	9.53552e-06	0.0272665	0.327106					0.707602	0.000331146	467.984	501.947	57				0.706925	0.000598297
																																						Average	0.707573							Average	0.70699
																																						2 s.d.	0.00034258							2 s.d.	0.000693669
																																						2 s.d. ppm	484.162							2 s.d. ppm	981.158
01	Sume01-Seq2-10um				0.000400727	0.000157285	7.0678e-06	0.00016299	0.00198339	0.000188976	6.20837e-06	0.000137117	-9.50569e-05	0.000175579	0.00062581	0.000166645	1.52313e-06	0.000148461	9.96747e-06	0.000159816	6.32675e-05	0.000155821		0.193072			3.64689e-05	1.13156e-05	0.00108109	1.51301e-05	2.44805e-06	0.0185112	7.4228e-06	0.0132779	0.159375					0.70724	0.00059545	841.935	-9.33687	57				0.706056	0.000968599
02	Sume02-Seq2-10um				0.000406741	0.000164381	3.32555e-06	0.000162746	0.00197836	0.000190354	9.32142e-06	0.000145346	-9.15036e-05	0.00016752	0.000619125	0.000135506	7.75734e-06	0.000174327	7.03448e-06	0.000160203	6.45921e-05	0.000154082		0.196688			3.75529e-05	2.6897e-05	0.00111302	9.54293e-06	-1.15901e-06	0.0188656	2.9944e-06	0.0135373	0.16236					0.707832	0.00053767	759.601	827.665	55				0.707483	0.00113139
03	Sume03-Seq2-10um				0.000407265	0.000174433	9.46888e-06	0.000166322	0.00197597	0.000203961	5.55012e-06	0.000148275	-9.45638e-05	0.000148894	0.000627994	0.000150116	8.22444e-07	0.000161772	1.04754e-05	0.000148639	6.57691e-05	0.000185167		0.188641			2.9555e-05	1.50559e-05	0.00107334	1.26156e-05	9.85787e-06	0.0180833	5.30453e-06	0.0129726	0.155714					0.707498	0.000710101	1003.68	354.636	57				0.706265	0.00133815
04	Sume01-Seq3-10um				0.000406152	0.000150264	1.98104e-06	0.00017253	0.00198019	0.0002086	9.39433e-06	0.000163577	-8.84841e-05	0.000163913	0.00062723	0.00015236	5.25992e-06	0.000153802	1.10685e-05	0.000152602	6.53582e-05	0.00014054		0.196309			3.70408e-05	2.02218e-05	0.00110756	1.57769e-05	3.55308e-06	0.0188298	4.92633e-06	0.0135053	0.162047					0.707777	0.000639404	903.398	748.786	55				0.706786	0.00132517
05	Sume02-Seq3-10um				0.000411302	0.00017655	4.05313e-06	0.000163793	0.00197449	0.000181013	1.14717e-05	0.000136016	-9.48078e-05	0.00016287	0.000616645	0.000140343	5.05131e-06	0.000164949	1.10242e-05	0.000160002	5.97192e-05	0.000166162		0.195583			3.46072e-05	1.89925e-05	0.00110613	1.30664e-05	8.44117e-06	0.0187662	3.0073e-06	0.0134611	0.161452					0.707792	0.000589148	832.375	770.108	55				0.707117	0.00117134
06	Sume03-Seq3-10um				0.00041137	0.000162341	9.11271e-06	0.000152013	0.00198258	0.000179144	8.80567e-06	0.000146755	-8.87894e-05	0.000181463	0.000624112	0.000156219	7.84984e-06	0.000170919	1.12791e-05	0.000158326	6.69401e-05	0.000152132		0.1928			2.8107e-05	1.82301e-05	0.00109033	7.59476e-06	8.13559e-06	0.0184976	-7.58425e-06	0.0132634	0.159147					0.707548	0.000682141	964.092	425.127	57				0.708376	0.00120232
07	Sume01-Seq6-10um				0.000420121	0.000157195	4.10591e-06	0.000172492	0.00200067	0.000185279	1.25872e-05	0.000147576	-9.62675e-05	0.000175269	0.000634298	0.000160969	-3.01002e-06	0.00017037	1.63591e-05	0.000167568	8.60815e-05	0.000152505		0.196408			2.60426e-05	2.60601e-05	0.00110027	1.33321e-05	-1.33667e-06	0.0188264	8.77306e-06	0.0135058	0.162108					0.707524	0.000618148	873.678	391.355	57				0.706706	0.00118352
08	Sume02-Seq6-10um				0.000414641	0.000164827	4.4591e-06	0.000152222	0.00198622	0.000193236	1.1156e-05	0.000146991	-9.4794e-05	0.000181469	0.000620381	0.000150441	6.87032e-06	0.000164762	1.36981e-05	0.00014363	8.42889e-05	0.000161929		0.19244			3.31128e-05	2.24268e-05	0.00108492	1.69747e-05	7.77974e-07	0.0184699	2.09477e-06	0.0132471	0.158832					0.707532	0.000634586	896.9	403.495	57				0.706891	0.00112646
09	Sume03-Seq6-10um				0.000412153	0.000161236	3.43335e-06	0.00017967	0.00198637	0.000191776	6.03798e-06	0.000135704	-9.93052e-05	0.000152753	0.000619116	0.000151816	-7.87702e-07	0.000178972	1.29805e-05	0.000158885	8.3421e-05	0.000164169		0.187277			3.39996e-05	2.63871e-05	0.00106034	5.5115e-06	7.56439e-06	0.0179682	-7.37578e-06	0.0128826	0.15457					0.707425	0.000659562	932.341	252.337	57				0.708226	0.00108165
10	Sume01-Seq1-10um				0.000417079	0.00016352	2.20558e-06	0.000158343	0.00203498	0.000190445	1.74058e-05	0.000174602	-8.74716e-05	0.000161765	0.000640219	0.000167468	3.36488e-06	0.000137774	1.1526e-05	0.000131066	6.50679e-05	0.000162744		0.1749			3.63919e-05	1.13e-05	0.000988287	8.17427e-06	3.71082e-06	0.0167627	6.48002e-06	0.0120223	0.144367					0.707179	0.000637137	900.956	-96.015	54				0.705979	0.00138873
11	Sume02-Seq1-10um				0.000415109	0.000148049	1.9086e-06	0.000171124	0.00203695	0.000206226	1.29941e-05	0.000133113	-9.28201e-05	0.000165388	0.000645425	0.000167391	8.36016e-06	0.000145408	1.36594e-05	0.00015732	6.10419e-05	0.000162886		0.171909			2.32162e-05	1.84962e-05	0.000971437	1.38705e-05	2.40401e-06	0.0164738	-2.19785e-06	0.0118236	0.141901					0.707638	0.000687434	971.448	553.327	57				0.706803	0.0014674
12	Sume03-Seq1-10um				0.000421573	0.000142546	4.80392e-07	0.00013106	0.00203134	0.000173825	1.53891e-05	0.000144923	-9.67864e-05	0.000170941	0.00063376	0.000147049	4.47355e-06	0.000159456	1.69209e-05	0.000161326	6.36006e-05	0.000165322		0.178161			2.0599e-05	1.70569e-05	0.0010082	8.07516e-06	7.4113e-06	0.0170917	3.73291e-06	0.012252	0.147061					0.707138	0.000743821	1051.88	-153.445	57				0.706859	0.00137698
13	Sume01-Seq2-10um				0.000412622	0.000179063	9.49337e-06	0.000139225	0.00203099	0.000196305	9.05922e-06	0.000147219	-8.83242e-05	0.000178566	0.000642435	0.0001547	4.37598e-06	0.000177278	1.62284e-05	0.000164502	6.58412e-05	0.000153255		0.173071			3.1431e-05	1.15994e-05	0.00097785	1.65751e-05	-3.20368e-07	0.0165817	1.02227e-05	0.0118989	0.142856					0.707682	0.00078911	1115.06	614.484	56				0.705793	0.00142335
14	Sume02-Seq2-10um				0.000413025	0.000187113	-8.91268e-07	0.000170809	0.00202262	0.000181601	1.37244e-05	0.000143849	-9.27677e-05	0.000146903	0.000642254	0.0001324	6.91753e-06	0.000150963	1.66043e-05	0.000159271	6.4692e-05	0.000143512		0.180435			3.29927e-05	3.29789e-05	0.00103068	1.9965e-05	9.48242e-08	0.017298	8.1503e-06	0.0124148	0.148938					0.707834	0.000683414	965.501	829.402	56				0.70642	0.00159765
15	Sume03-Seq2-10um				0.000416411	0.000183087	4.15687e-06	0.000173199	0.00202891	0.000172078	1.40867e-05	0.000162384	-8.7531e-05	0.000156999	0.000641798	0.000132245	2.79886e-06	0.000164135	1.62022e-05	0.000156888	6.55407e-05	0.00016608		0.174278			2.89113e-05	2.10391e-05	0.000989453	7.79621e-06	8.61236e-06	0.0167038	1.64426e-05	0.011988	0.143853					0.708023	0.000698965	987.206	1097.88	58				0.705213	0.00124557
16	Sume01-Seq3-10um				0.000416333	0.000168592	4.72199e-07	0.000153591	0.00203829	0.000173751	1.84064e-05	0.000154348	-8.43147e-05	0.000164953	0.000635804	0.000132688	9.91356e-07	0.000175986	1.31711e-05	0.000149935	6.2425e-05	0.000159845		0.173568			3.78782e-05	2.87596e-05	0.000975438	7.65762e-06	-2.72277e-06	0.0166374	3.19518e-06	0.0119415	0.14327					0.707748	0.000766237	1082.64	707.911	57				0.707428	0.00113866
17	Sume02-Seq3-10um				0.000414923	0.000192364	1.52359e-06	0.000154527	0.00203586	0.000193492	9.37553e-06	0.000166945	-8.84625e-05	0.000166575	0.000638192	0.000163736	2.68642e-06	0.000131325	2.00436e-05	0.000146902	5.90094e-05	0.000164865		0.173222			3.04016e-05	1.53852e-05	0.000977911	1.48677e-05	-6.70099e-06	0.016606	4.40214e-06	0.0119059	0.142988					0.707087	0.000822601	1163.37	-225.981	57				0.706277	0.00125076
18	Sume03-Seq3-10um				0.000415541	0.000160904	4.32009e-06	0.000148997	0.00203763	0.000182209	1.60838e-05	0.000153035	-8.24394e-05	0.000182299	0.000641705	0.000121876	4.61759e-06	0.000163033	1.69676e-05	0.000145501	6.42068e-05	0.000130977		0.17401			3.21281e-05	2.26235e-05	0.000990498	3.66954e-06	3.64691e-06	0.0166708	1.55725e-05	0.0119746	0.143633					0.708094	0.000609378	860.589	1197.88	54				0.705916	0.00166432
19	Sume01-Seq4-10um				0.000413739	0.000155065	-8.35463e-07	0.000171613	0.00203102	0.000179241	1.39693e-05	0.00015144	-8.73063e-05	0.000153528	0.000639563	0.000152214	6.38398e-06	0.000138424	1.47173e-05	0.000157572	6.24632e-05	0.000171023		0.175876			3.55165e-05	2.59006e-05	0.00100695	1.69204e-05	3.5314e-06	0.0168628	9.70112e-06	0.0120961	0.145176					0.707463	0.000592799	837.922	305.942	56				0.705741	0.00122637
20	Sume03-Seq4-10um				0.000417307	0.000172622	2.29312e-06	0.000180649	0.00202796	0.000175161	1.81251e-05	0.000138662	-9.38233e-05	0.000151264	0.000635317	0.000157563	8.47386e-06	0.000150537	1.20466e-05	0.000154258	6.53111e-05	0.000167121		0.176602			3.33371e-05	2.26492e-05	0.000997605	3.74307e-06	-3.27532e-06	0.0169384	-4.12917e-07	0.0121357	0.145773					0.706669	0.000660068	934.056	-817.911	57				0.706149	0.00135537
21	Sume02-Seq4-10um				0.00041637	0.000163001	2.81475e-06	0.000153709	0.00203308	0.00018127	2.23373e-05	0.00014666	-8.86867e-05	0.000157969	0.000639829	0.000157442	2.80209e-06	0.000167995	1.45954e-05	0.000131029	5.76107e-05	0.00015969		0.179638			3.57403e-05	2.03425e-05	0.0010237	1.29737e-05	4.61383e-06	0.017215	4.38736e-06	0.0123545	0.148287					0.707766	0.000618674	874.121	734.167	57				0.707295	0.00116547
																																						Average	0.707547							Average	0.706656
																																						2 s.d.	0.000681424							2 s.d.	0.00161837
																																						2 s.d. ppm	963.08							2 s.d. ppm	2290.19
[truncated: 3 more columns]
